# Supplementary material for: Mechanisms of BPA Degradation and Toxicity Resistance in Rhodococcus equi
Source: Microorganisms. 2022 Dec 26;11(1):67. doi: 10.3390/microorganisms11010067 (PMC9862853; doi:10.3390/microorganisms11010067)
Supplement: Supplementary file 1 [file microorganisms-11-00067-s001.zip › Supplementary tables.xlsx]

## Sheet: Table S1
Table S1. 5 mg/L BPA-treated group (A1) significantly differentially expressed genes
Gene id	MeanTPM (A1)	MeanTPM (B1)	log2FoldChange	pValue	qValue	result	GeneName	GeneDescription	GO	KEGG	COG
GE00631	4661.75	1750.79	1.41287	0	0	up	GE00631	Malonyl CoA-acyl carrier protein transacylase	GO:0003674,GO:0003824,GO:0004312,GO:0004314,GO:0005575,GO:0005622,GO:0005737,GO:0005829,GO:0005835,GO:0006082,GO:0006629,GO:0006631,GO:0006633,GO:0008150,GO:0008152,GO:0008610,GO:0009058,GO:0009987,GO:0016053,GO:0016417,GO:0016419,GO:0016420,GO:0016740,GO:0016746,GO:0016747,GO:0019752,GO:0032787,GO:0032991,GO:0043436,GO:0044237,GO:0044238,GO:0044249,GO:0044255,GO:0044281,GO:0044283,GO:0046394,GO:…	K00645-ko01212 Fatty acid metabolism;ko00061 Fatty acid biosynthesis	COG0331-(acyl-carrier-protein) S-malonyltransferase[I]
GE04695	6570.1	2055.77	1.67624	0	0	up	GE04695	hypothetical protein	-	-	-
GE02065	13591.5	6581.05	1.04631	0	0	up	GE02065	hypothetical protein	-	-	-
GE03616	3492.08	937.16	1.89772	0	0	up	GE03616	hypothetical protein	-	-	-
GE00275	327.13	80.94	2.01494	6.93e-231	6.8e-229	up	GE00275	Acryloyl-CoA reductase	-	K00249-ko01200 Carbon metabolism;ko01212 Fatty acid metabolism;ko00640 Propanoate metabolism;ko00071 Fatty acid degradation;ko00280 Valine, leucine and isoleucine degradation;ko00410 beta-Alanine metabolism;ko03320 PPAR signaling pathway	COG1960-Acyl-CoA dehydrogenases[I]
GE04359	288.63	93.67	1.62356	2.17e-181	1.75e-179	up	GE04359	3-ketoacyl-CoA thiolase	GO:0003674,GO:0003676,GO:0003723,GO:0003729,GO:0003824,GO:0003988,GO:0005488,GO:0005575,GO:0005622,GO:0005737,GO:0005739,GO:0005740,GO:0005758,GO:0005777,GO:0005782,GO:0006082,GO:0006629,GO:0006631,GO:0006635,GO:0008150,GO:0008152,GO:0009056,GO:0009062,GO:0009987,GO:0016042,GO:0016054,GO:0016408,GO:0016740,GO:0016746,GO:0016747,GO:0019395,GO:0019752,GO:0030258,GO:0031907,GO:0031967,GO:0031970,GO:…	K00626-ko01200 Carbon metabolism;ko01212 Fatty acid metabolism;ko00620 Pyruvate metabolism;ko00630 Glyoxylate and dicarboxylate metabolism;ko00640 Propanoate metabolism;ko00650 Butanoate metabolism;ko00720 Carbon fixation pathways in prokaryotes;ko00071 Fatty acid degradation;ko00072 Synthesis and degradation of ketone bodies;ko00280 Valine, leucine and isoleucine degradation;ko00310 Lysine degra…	COG0183-Acetyl-CoA acetyltransferase[I]
GE01535	783.42	361.94	1.11404	1.61e-167	1.15e-165	up	GE01535	hypothetical protein	-	-	-
GE00276	218.14	62.12	1.81212	4.26e-159	2.83e-157	up	GE00276	putative acyl-CoA dehydrogenase YngJ	-	-	COG1960-Acyl-CoA dehydrogenases[I]
GE03702	498.3	240.32	1.05206	1.2e-147	7.22e-146	up	GE03702	Phthalate dioxygenase reductase	-	-	COG1018-Flavodoxin reductases (ferredoxin-NADPH reductases) family 1[C]
GE02039	433.37	179.66	1.27033	1.11e-136	5.95e-135	up	GE02039	Putative acetyl-hydrolase LipR (Precursor)	-	-	COG0657-Esterase/lipase[I]
GE00066	248.13	67.67	1.87451	2.9e-126	1.46e-124	up	GE00066	hypothetical protein	-	-	COG4759-Uncharacterized protein conserved in bacteria containing thioredoxin-like domain[O]
GE04083	423.24	167.18	1.34007	3.7e-97	1.4e-95	up	GE04083	HTH-type transcriptional repressor KstR	-	-	COG1309-Transcriptional regulator[K]
GE00068	83.01	27.57	1.59019	3.91e-75	1.15e-73	up	GE00068	Fatty acyl-CoA reductase	-	-	COG4221-Short-chain alcohol dehydrogenase of unknown specificity[R]
GE02994	322.2	133.13	1.27512	3.87e-65	9.77e-64	up	GE02994	Flavin-dependent monooxygenase, reductase subunit HsaB	GO:0000166,GO:0003674,GO:0003824,GO:0005488,GO:0006066,GO:0006629,GO:0006694,GO:0006706,GO:0006707,GO:0008150,GO:0008152,GO:0008202,GO:0008203,GO:0008610,GO:0009056,GO:0009058,GO:0016042,GO:0016125,GO:0016127,GO:0016491,GO:0016645,GO:0016646,GO:0036094,GO:0042602,GO:0043167,GO:0043168,GO:0044238,GO:0044281,GO:0044282,GO:0046164,GO:0050660,GO:0055114,GO:0071704,GO:0097159,GO:1901265,GO:1901360,GO:…	K16048-ko00984 Steroid degradation	COG1853-Conserved protein/domain typically associated with flavoprotein oxygenases, DIM6/NTAB family[R]
GE02235	132.05	58.34	1.17853	6.05e-44	9.31e-43	up	GE02235	Poly-beta-hydroxybutyrate polymerase	-	K03821-ko00650 Butanoate metabolism	COG3243-Poly(3-hydroxyalkanoate) synthetase[I]
GE03495	174.17	78.1	1.1571	1.62e-42	2.42e-41	up	GE03495	3'-phosphoadenosine 5'-phosphate phosphatase	-	K01082-ko00920 Sulfur metabolism	COG1218-3'-Phosphoadenosine 5'-phosphosulfate (PAPS) 3'-phosphatase[P]
GE01804	132.29	60.76	1.12251	2.07e-39	2.85e-38	up	GE01804	Pyruvate dehydrogenase E1 component subunit beta	-	K00162-ko01200 Carbon metabolism;ko00010 Glycolysis / Gluconeogenesis;ko00020 Citrate cycle (TCA cycle);ko00620 Pyruvate metabolism;ko04066 HIF-1 signaling pathway;ko04922 Glucagon signaling pathway;ko05230 Central carbon metabolism in cancer	COG0022-Pyruvate/2-oxoglutarate dehydrogenase complex, dehydrogenase (E1) component, eukaryotic type, beta subunit[C]
GE00129	116.41	49.7	1.2279	6.07e-37	7.67e-36	up	GE00129	hypothetical protein	-	-	COG1752-Predicted esterase of the alpha-beta hydrolase superfamily[R]
GE02300	226.54	86.42	1.39033	1.65e-36	2.07e-35	up	GE02300	putative protein Mb0911c	-	-	COG2764-Uncharacterized protein conserved in bacteria[S]
GE03138	160.49	42.87	1.90444	2.79e-34	3.36e-33	up	GE03138	hypothetical protein	-	-	-
GE01291	41.48	4.98	3.0582	2.56e-33	3e-32	up	GE01291	Carboxylesterase YbfK	-	-	COG0596-Predicted hydrolases or acyltransferases (alpha/beta hydrolase superfamily) [R]
GE02923	54.33	23.19	1.22825	3.67e-31	4.05e-30	up	GE02923	Multidrug resistance-like ATP-binding protein MdlA	-	-	COG1132-ABC-type multidrug transport system, ATPase and permease components[V]
GE04419	156.1	69.57	1.16593	2.01e-28	2.07e-27	up	GE04419	hypothetical protein	-	-	-
GE04260	38.09	12.55	1.60172	6.3e-22	5.05e-21	up	GE04260	Imidazolonepropionase	-	K01468-ko00340 Histidine metabolism	COG1228-Imidazolonepropionase and related amidohydrolases[Q]
GE04441	79.51	34.7	1.1962	2.6e-20	1.98e-19	up	GE04441	Ferredoxin--NAD(+) reductase	-	-	COG0543-2-polyprenylphenol hydroxylase and related flavodoxin oxidoreductases[HC]
rrna11	482.65	214.77	1.16818	1.4e-18	9.79e-18	up	rrna11	5S ribosomal RNA	-	-	-
GE03246	104.73	47.07	1.1538	8.73e-15	5.02e-14	up	GE03246	hypothetical protein	-	-	-
GE00161	59.27	26.17	1.17939	1.43e-14	8.12e-14	up	GE00161	hypothetical protein	-	-	-
GE04394	2.42	1.14	1.08597	5.03e-14	2.79e-13	up	GE04394	ATP-dependent leucine adenylase	-	-	COG1020-Non-ribosomal peptide synthetase modules and related proteins[Q]
GE04382	82.26	33.2	1.30901	8.14e-13	4.22e-12	up	GE04382	hypothetical protein	-	-	-
GE02439	171.39	83.45	1.0383	1.38e-12	7.05e-12	up	GE02439	hypothetical protein	-	-	-
GE01989	84.95	42.44	1.00119	7.79e-11	3.54e-10	up	GE01989	hypothetical protein	-	-	-
GE04320	38.28	15.48	1.30619	1.13e-10	5.08e-10	up	GE04320	Putative L-lactate dehydrogenase operon regulatory protein	-	-	COG2186-Transcriptional regulators[K]
GE02040	34.64	16.16	1.10001	1.75e-10	7.75e-10	up	GE02040	hypothetical protein	-	K05845-ko02010 ABC transporters	COG1732-Periplasmic glycine betaine/choline-binding (lipo)protein of an ABC-type transport system (osmoprotectant binding protein)[M]
GE02113	23.21	6.61	1.81202	1.53e-08	5.9e-08	up	GE02113	putative HTH-type transcriptional regulator Mb3439c	-	-	-
GE03244	16.56	5.09	1.70197	6.31e-08	2.31e-07	up	GE03244	putative HTH-type transcriptional regulator YagI	-	-	COG1414-Transcriptional regulator[K]
GE02282	12.06	5.81	1.05362	9.64e-07	3.2e-06	up	GE02282	putative protein Mb2126 (Precursor)	-	-	-
GE01292	22.14	7.09	1.6428	2.5e-06	7.91e-06	up	GE01292	putative HTH-type transcriptional regulator YcgE	-	-	COG1846-Transcriptional regulators[K]
GE02855	1.61	0.62	1.37672	4.57e-06	1.41e-05	up	GE02855	Dimodular nonribosomal peptide synthase	-	-	COG1020-Non-ribosomal peptide synthetase modules and related proteins[Q]
GE03588	25.68	12.06	1.09042	7.76e-06	2.33e-05	up	GE03588	Transcriptional regulatory protein LiaR	-	-	COG2197-Response regulator containing a CheY-like receiver domain and an HTH DNA-binding domain[TK]
GE03554	5.94	0.63	3.23704	1.4e-05	4.1e-05	up	GE03554	hypothetical protein	-	-	-
trna40	133.54	55.15	1.27584	1.42e-05	4.13e-05	up	trna40	tRNA-Sec	-	-	-
GE02145	23.83	11.33	1.07263	2.95e-05	8.23e-05	up	GE02145	HTH-type transcriptional repressor KstR2	-	-	COG1309-Transcriptional regulator[K]
GE04699	13.89	6.29	1.14291	0.000111068	0.000289238	up	GE04699	Release factor glutamine methyltransferase	-	-	COG2890-Methylase of polypeptide chain release factors[J]
GE04401	25.47	11.43	1.15597	0.000133755	0.000345132	up	GE04401	hypothetical protein	-	-	-
GE04575	3.16	0.64	2.30378	0.000139912	0.000360402	up	GE04575	Puromycin resistance protein pur8	-	-	-
GE03240	16.7	7.4	1.17425	0.000349992	0.00086077	up	GE03240	Transcriptional regulator FurA	-	-	COG0735-Fe2+/Zn2+ uptake regulation proteins[P]
GE02444	14.25	5.12	1.47675	0.0016067	0.00355791	up	GE02444	hypothetical protein	-	-	-
GE04377	2.05	0.23	3.15592	0.00295991	0.00623044	up	GE04377	hypothetical protein	-	-	COG1960-Acyl-CoA dehydrogenases[I]
GE01851	0.77	0.0001	12.9106	0.00296765	0.00623801	up	GE01851	hypothetical protein	-	-	-
GE05032	11.65	5.81	1.00372	0.00309602	0.00649574	up	GE05032	hypothetical protein	-	-	-
GE03989	2.67	0.83	1.68566	0.00378347	0.00783248	up	GE03989	Putative diacylglycerol O-acyltransferase Rv3740c	-	K00635-ko00561 Glycerolipid metabolism	-
GE02296	10.44	5.16	1.01668	0.00379769	0.00785472	up	GE02296	Transcriptional regulatory protein PrrA	-	K07671-ko02020 Two-component system	COG0745-Response regulators consisting of a CheY-like receiver domain and a winged-helix DNA-binding domain[TK]
GE00247	12.26	5.69	1.10746	0.00467276	0.00949062	up	GE00247	putative N-acetyltransferase YjhQ	-	-	COG3153-Predicted acetyltransferase[R]
GE04414	5.29	2.15	1.29893	0.00648333	0.0128274	up	GE04414	HTH-type transcriptional regulator AlsR	-	-	COG0583-Transcriptional regulator[K]
GE03905	9.14	3.72	1.29689	0.00648333	0.0128274	up	GE03905	hypothetical protein	-	-	-
GE04077	6.78	2.77	1.2914	0.00648333	0.0128274	up	GE04077	hypothetical protein	-	-	-
GE01949	1.88	0.39	2.26919	0.00708361	0.0139296	up	GE01949	Acetyl-CoA:oxalate CoA-transferase	-	-	COG1804-Predicted acyl-CoA transferases/carnitine dehydratase[C]
GE03993	6.4	2.39	1.42106	0.00905084	0.0173372	up	GE03993	hypothetical protein	-	-	-
GE04579	2.43	0.54	2.16993	0.012946	0.0241927	up	GE04579	putative protein Rv2248	-	-	-
GE02853	0.16	0.03	2.41504	0.021268	0.0381261	up	GE02853	ATP-dependent tryptophan/phenylalanine/tyrosine adenylase	-	-	COG1020-Non-ribosomal peptide synthetase modules and related proteins[Q]
GE04034	2.01	0.32	2.65105	0.021268	0.0381261	up	GE04034	Carnitinyl-CoA dehydratase	-	-	COG1024-Enoyl-CoA hydratase/carnithine racemase[I]
GE02043	1.88	0.0001	14.1984	0.0226287	0.0403171	up	GE02043	Choline transport system permease protein OpuBB	-	K05846-ko02010 ABC transporters	COG1174-ABC-type proline/glycine betaine transport systems, permease component[E]
GE00238	1.63	0.68	1.26127	0.0231731	0.0412139	up	GE00238	Assimilatory nitrate reductase catalytic subunit	-	K00372-ko00910 Nitrogen metabolism	COG3383-Uncharacterized anaerobic dehydrogenase[R]
GE03623	3.39	1.43	1.24527	0.0231731	0.0412139	up	GE03623	hypothetical protein	-	-	-
trna24	55.34	26.12	1.08317	0.0240733	0.0426051	up	trna24	tRNA-Ile	-	-	-
GE00200	423.76	5486.16	-3.69448	0	0	down	GE00200	Light-repressed protein A	GO:0003674,GO:0005488,GO:0005575,GO:0005622,GO:0005737,GO:0005829,GO:0005840,GO:0006417,GO:0006448,GO:0008150,GO:0009889,GO:0009890,GO:0009892,GO:0010468,GO:0010556,GO:0010558,GO:0010605,GO:0010608,GO:0010629,GO:0015935,GO:0017148,GO:0019222,GO:0022626,GO:0022627,GO:0031323,GO:0031324,GO:0031326,GO:0031327,GO:0032268,GO:0032269,GO:0032991,GO:0034248,GO:0034249,GO:0043021,GO:0043022,GO:0043024,GO:…	-	COG1544-Ribosome-associated protein Y (PSrp-1)[J]
GE04708	2241.35	15808	-2.81822	0	0	down	GE04708	hypothetical protein	-	-	-
GE03151	109.05	978.72	-3.16591	0	0	down	GE03151	Acetyl-coenzyme A synthetase (Precursor)	-	K01895-ko01200 Carbon metabolism;ko00010 Glycolysis / Gluconeogenesis;ko00620 Pyruvate metabolism;ko00640 Propanoate metabolism;ko00720 Carbon fixation pathways in prokaryotes;ko00680 Methane metabolism	COG0365-Acyl-coenzyme A synthetases/AMP-(fatty) acid ligases[I]
GE04617	320.12	1868.47	-2.54517	0	0	down	GE04617	Isocitrate lyase	GO:0001101,GO:0001666,GO:0003674,GO:0003824,GO:0004451,GO:0005488,GO:0005515,GO:0005575,GO:0005576,GO:0005622,GO:0005737,GO:0005829,GO:0005886,GO:0005975,GO:0006081,GO:0006082,GO:0006097,GO:0006102,GO:0006950,GO:0008150,GO:0008152,GO:0009268,GO:0009405,GO:0009605,GO:0009607,GO:0009628,GO:0009987,GO:0010033,GO:0010034,GO:0010447,GO:0016020,GO:0016829,GO:0016830,GO:0016833,GO:0019752,GO:0019899,GO:…	K01637-ko01200 Carbon metabolism;ko00630 Glyoxylate and dicarboxylate metabolism	COG2224-Isocitrate lyase[C]
GE02569	11126.9	36263.9	-1.70448	0	0	down	GE02569	hypothetical protein	-	-	-
GE04618	1594.52	4898.77	-1.6193	0	0	down	GE04618	3-hydroxybutyryl-CoA dehydrogenase	GO:0003674,GO:0003824,GO:0005575,GO:0005618,GO:0005622,GO:0005737,GO:0005829,GO:0005886,GO:0006082,GO:0006629,GO:0006631,GO:0006633,GO:0006635,GO:0008150,GO:0008152,GO:0008610,GO:0008691,GO:0009056,GO:0009058,GO:0009062,GO:0009605,GO:0009607,GO:0009987,GO:0016020,GO:0016042,GO:0016053,GO:0016054,GO:0016491,GO:0016614,GO:0016616,GO:0019395,GO:0019752,GO:0030258,GO:0030312,GO:0030497,GO:0032787,GO:…	K00074-ko00650 Butanoate metabolism;ko00360 Phenylalanine metabolism;ko00362 Benzoate degradation	COG1250-3-hydroxyacyl-CoA dehydrogenase[I]
GE02466	431.46	1803.27	-2.06332	0	0	down	GE02466	putative symporter YwcA	-	-	COG4147-Predicted symporter[R]
GE01486	280.19	3238.41	-3.53081	0	0	down	GE01486	hypothetical protein	-	-	-
GE00737	2156.31	6395.87	-1.56858	0	0	down	GE00737	hypothetical protein	-	-	-
GE04765	694.11	3024.05	-2.12325	0	0	down	GE04765	50S ribosomal protein L10	GO:0003674,GO:0003735,GO:0005198,GO:0005575,GO:0005618,GO:0005622,GO:0005737,GO:0005829,GO:0005840,GO:0005886,GO:0006412,GO:0006518,GO:0006807,GO:0008150,GO:0008152,GO:0009058,GO:0009059,GO:0009987,GO:0010467,GO:0015934,GO:0016020,GO:0019538,GO:0022625,GO:0022626,GO:0030312,GO:0032991,GO:0034641,GO:0034645,GO:0040007,GO:0043043,GO:0043170,GO:0043226,GO:0043228,GO:0043229,GO:0043232,GO:0043603,GO:…	K02864-ko03010 Ribosome	COG0244-Ribosomal protein L10[J]
GE00398	111.07	590.64	-2.41081	0	0	down	GE00398	Polyphosphate kinase	GO:0000287,GO:0001666,GO:0003674,GO:0003824,GO:0005488,GO:0005575,GO:0005886,GO:0006464,GO:0006468,GO:0006793,GO:0006796,GO:0006807,GO:0006950,GO:0006979,GO:0007154,GO:0008150,GO:0008152,GO:0008976,GO:0009267,GO:0009405,GO:0009605,GO:0009628,GO:0009987,GO:0009991,GO:0015968,GO:0016020,GO:0016301,GO:0016310,GO:0016740,GO:0016772,GO:0016776,GO:0019538,GO:0031667,GO:0031668,GO:0031669,GO:0033554,GO:…	K00937-ko00190 Oxidative phosphorylation;ko03018 RNA degradation	COG0855-Polyphosphate kinase[P]
GE04766	237.25	2258.17	-3.25067	0	0	down	GE04766	50S ribosomal protein L7/L12	GO:0005575,GO:0005618,GO:0005622,GO:0005737,GO:0005829,GO:0005886,GO:0008150,GO:0016020,GO:0030312,GO:0040007,GO:0071944	K02935-ko03010 Ribosome	COG0222-Ribosomal protein L7/L12[J]
GE00897	28.54	674.94	-4.5637	0	0	down	GE00897	putative manganese catalase	-	-	COG3546-Mn-containing catalase[P]
GE00700	285.03	988.52	-1.79416	0	0	down	GE00700	Ubiquinol-cytochrome c reductase cytochrome b subunit	GO:0005575,GO:0005886,GO:0005887,GO:0008150,GO:0016020,GO:0016021,GO:0031224,GO:0031226,GO:0040007,GO:0071944	K03891-ko00190 Oxidative phosphorylation	COG1290-Cytochrome b subunit of the bc complex[C]
GE03420	494.21	3849.93	-2.96164	0	0	down	GE03420	UPF0337 protein DIP1660	-	-	COG3237-Uncharacterized protein conserved in bacteria[S]
GE03964	274.09	1081.31	-1.98006	0	0	down	GE03964	hypothetical protein	-	-	-
GE00040	593.96	3054.84	-2.36266	0	0	down	GE00040	10 kDa chaperonin	GO:0003674,GO:0005488,GO:0005515,GO:0005575,GO:0005576,GO:0005618,GO:0005622,GO:0005737,GO:0005829,GO:0005886,GO:0006355,GO:0006457,GO:0006458,GO:0006950,GO:0006986,GO:0008150,GO:0009266,GO:0009408,GO:0009628,GO:0009889,GO:0009987,GO:0010033,GO:0010468,GO:0010556,GO:0016020,GO:0019219,GO:0019222,GO:0019899,GO:0030312,GO:0031323,GO:0031326,GO:0033554,GO:0034605,GO:0035375,GO:0035966,GO:0040007,GO:…	-	COG0234-Co-chaperonin GroES (HSP10)[O]
GE04707	4042.71	10345.8	-1.35565	0	0	down	GE04707	hypothetical protein	-	-	-
GE04802	167.94	789.35	-2.23272	0	0	down	GE04802	Elongation factor Tu	GO:0001666,GO:0003674,GO:0005488,GO:0005515,GO:0005575,GO:0005576,GO:0005618,GO:0005622,GO:0005737,GO:0005829,GO:0005886,GO:0006950,GO:0008150,GO:0009628,GO:0010035,GO:0010038,GO:0010039,GO:0016020,GO:0019899,GO:0030312,GO:0035375,GO:0036293,GO:0040007,GO:0042221,GO:0050896,GO:0070482,GO:0071944	-	COG0050-GTPases - translation elongation factors[J]
GE01461	918.33	3645.71	-1.98912	0	0	down	GE01461	hypothetical protein	-	-	-
GE00872	207.55	1459.15	-2.8136	0	0	down	GE00872	18 kDa heat shock protein	-	K13993-ko04141 Protein processing in endoplasmic reticulum	COG0071-Molecular chaperone (small heat shock protein)[O]
GE01727	192.78	753.68	-1.967	0	0	down	GE01727	ATP synthase subunit beta	GO:0005575,GO:0005576,GO:0005618,GO:0005622,GO:0005737,GO:0005829,GO:0005886,GO:0008150,GO:0016020,GO:0030312,GO:0040007,GO:0071944	K02112-ko00190 Oxidative phosphorylation;ko00195 Photosynthesis	COG0055-F0F1-type ATP synthase, beta subunit[C]
GE04631	440.77	1445.27	-1.71324	0	0	down	GE04631	putative protein Mb0909	-	-	-
GE03046	544.79	2137.45	-1.97212	0	0	down	GE03046	RNA polymerase-binding transcription factor CarD	GO:0006950,GO:0007154,GO:0008150,GO:0009267,GO:0009405,GO:0009605,GO:0009987,GO:0009991,GO:0015968,GO:0031667,GO:0031668,GO:0031669,GO:0033554,GO:0040007,GO:0042594,GO:0044419,GO:0050896,GO:0051704,GO:0051716,GO:0071496	-	COG1329-Transcriptional regulators, similar to M. xanthus CarD[K]
GE00336	16.85	213.88	-3.66598	0	0	down	GE00336	Ribonucleoside-diphosphate reductase subunit alpha	GO:0000166,GO:0003674,GO:0003824,GO:0004748,GO:0005488,GO:0005524,GO:0005575,GO:0005622,GO:0005737,GO:0005829,GO:0005886,GO:0005971,GO:0006139,GO:0006259,GO:0006260,GO:0006725,GO:0006753,GO:0006793,GO:0006796,GO:0006807,GO:0008144,GO:0008150,GO:0008152,GO:0009058,GO:0009059,GO:0009117,GO:0009165,GO:0009262,GO:0009263,GO:0009987,GO:0016020,GO:0016491,GO:0016725,GO:0016728,GO:0017076,GO:0018130,GO:…	K00525-ko00230 Purine metabolism;ko00240 Pyrimidine metabolism	COG0209-Ribonucleotide reductase, alpha subunit[F]
GE04585	75.55	399.56	-2.40291	0	0	down	GE04585	60 kDa chaperonin	GO:0001666,GO:0003674,GO:0005488,GO:0005515,GO:0005575,GO:0005576,GO:0005618,GO:0005622,GO:0005737,GO:0005829,GO:0005886,GO:0006457,GO:0006458,GO:0006950,GO:0008150,GO:0009266,GO:0009408,GO:0009628,GO:0009987,GO:0016020,GO:0016465,GO:0022610,GO:0030112,GO:0030312,GO:0030313,GO:0031975,GO:0032991,GO:0036293,GO:0040007,GO:0042026,GO:0042603,GO:0043388,GO:0044093,GO:0044183,GO:0044403,GO:0044406,GO:…	K04077-ko03018 RNA degradation;ko04212 Longevity regulating pathway - worm;ko04940 Type I diabetes mellitus;ko05134 Legionellosis;ko05152 Tuberculosis	COG0459-Chaperonin GroEL (HSP60 family)[O]
GE02928	99.94	486.15	-2.28227	0	0	down	GE02928	hypothetical protein	-	K02067-ko02010 ABC transporters	COG1463-ABC-type transport system involved in resistance to organic solvents, periplasmic component[Q]
GE00334	70.92	1434.18	-4.33789	8.13e-300	1.05e-297	down	GE00334	Glutaredoxin-like protein NrdH	-	-	COG0695-Glutaredoxin and related proteins[O]
GE04003	169.87	582.42	-1.77763	4.64e-276	5.82e-274	down	GE04003	Catalase	-	K03781-ko01200 Carbon metabolism;ko00630 Glyoxylate and dicarboxylate metabolism;ko00380 Tryptophan metabolism;ko04011 MAPK signaling pathway - yeast;ko04068 FoxO signaling pathway;ko04146 Peroxisome;ko04211 Longevity regulating pathway - mammal;ko04212 Longevity regulating pathway - worm;ko04213 Longevity regulating pathway - multiple species;ko05014 Amyotrophic lateral sclerosis (ALS)	COG0753-Catalase[P]
trna30	1321.62	6430.6	-2.28265	9.27e-269	1.13e-266	down	trna30	tRNA-Ser	-	-	-
GE00230	1258.56	2783.93	-1.14535	1.63e-259	1.94e-257	down	GE00230	putative HTH-type transcriptional regulator Rv0472c	-	-	COG1309-Transcriptional regulator[K]
GE01448	63.55	489.04	-2.94399	2.15e-258	2.49e-256	down	GE01448	Daunorubicin/doxorubicin resistance ABC transporter permease protein DrrB	-	-	COG0842-ABC-type multidrug transport system, permease component[V]
GE00385	28.39	331.55	-3.54577	2.62e-255	2.96e-253	down	GE00385	Ketol-acid reductoisomerase	GO:0003674,GO:0003824,GO:0005575,GO:0005622,GO:0005737,GO:0005829,GO:0005886,GO:0008150,GO:0008152,GO:0008677,GO:0016020,GO:0016491,GO:0016614,GO:0016616,GO:0040007,GO:0055114,GO:0071944	K00053-ko01210 2-Oxocarboxylic acid metabolism;ko01230 Biosynthesis of amino acids;ko00290 Valine, leucine and isoleucine biosynthesis;ko00770 Pantothenate and CoA biosynthesis	COG0059-Ketol-acid reductoisomerase[EH]
GE00229	370.42	2078.28	-2.48816	3.02e-248	3.32e-246	down	GE00229	hypothetical protein	-	-	-
GE02232	92.52	537.48	-2.53837	5.51e-244	5.92e-242	down	GE02232	hypothetical protein	-	-	COG4760-Predicted membrane protein[S]
GE03904	22.94	224.79	-3.29264	9.67e-241	1.01e-238	down	GE03904	Succinyl-CoA:acetate CoA-transferase	-	K18118-ko01200 Carbon metabolism;ko00020 Citrate cycle (TCA cycle);ko00620 Pyruvate metabolism;ko00650 Butanoate metabolism	COG0427-Acetyl-CoA hydrolase[C]
GE02090	1966.23	4935	-1.32762	1.38e-239	1.42e-237	down	GE02090	hypothetical protein	-	-	-
GE00391	98.78	1589.17	-4.00791	7.23e-227	6.94e-225	down	GE00391	hypothetical protein	-	-	-
GE03796	40.75	308.69	-2.92129	2.13e-213	2e-211	down	GE03796	Inositol-3-phosphate synthase	GO:0003674,GO:0003824,GO:0004512,GO:0005488,GO:0005575,GO:0005622,GO:0005737,GO:0005829,GO:0006790,GO:0008150,GO:0008152,GO:0008270,GO:0009058,GO:0009405,GO:0009987,GO:0010125,GO:0010126,GO:0016137,GO:0016138,GO:0016853,GO:0016872,GO:0043167,GO:0043169,GO:0044237,GO:0044249,GO:0044272,GO:0044419,GO:0046872,GO:0046914,GO:0051704,GO:0071704,GO:1901135,GO:1901137,GO:1901576,GO:1901657,GO:1901659	K01858-ko00562 Inositol phosphate metabolism;ko00521 Streptomycin biosynthesis	COG1260-Myo-inositol-1-phosphate synthase[I]
GE01728	130.73	536.92	-2.03812	2.75e-205	2.53e-203	down	GE01728	ATP synthase gamma chain	GO:0005575,GO:0005618,GO:0005886,GO:0008150,GO:0016020,GO:0030312,GO:0040007,GO:0071944	K02115-ko00190 Oxidative phosphorylation;ko00195 Photosynthesis	COG0224-F0F1-type ATP synthase, gamma subunit[C]
GE00997	289.72	728.28	-1.32983	1.81e-200	1.64e-198	down	GE00997	30S ribosomal protein S1	GO:0005575,GO:0005618,GO:0005622,GO:0005737,GO:0005829,GO:0005886,GO:0008150,GO:0016020,GO:0030312,GO:0040007,GO:0071944	K02945-ko03010 Ribosome	COG0539-Ribosomal protein S1[J]
GE01740	243.17	1464.13	-2.59001	3.69e-187	3.27e-185	down	GE01740	50S ribosomal protein L31	GO:0008150,GO:0040007	K02909-ko03010 Ribosome	COG0254-Ribosomal protein L31[J]
GE03427	286.77	607.49	-1.08297	1.56e-186	1.35e-184	down	GE03427	Chaperone protein ClpB	-	-	COG0542-ATPases with chaperone activity, ATP-binding subunit[O]
GE00869	672.04	2197.16	-1.70902	5.46e-186	4.65e-184	down	GE00869	hypothetical protein	-	-	-
GE03348	789.83	1649.22	-1.06217	1.45e-184	1.21e-182	down	GE03348	putative thc operon regulatory protein	-	-	COG2207-AraC-type DNA-binding domain-containing proteins[K]
GE00694	311.33	1309.25	-2.07222	7.02e-184	5.76e-182	down	GE00694	Protein Mb2227c	GO:0003674,GO:0005488,GO:0005506,GO:0005575,GO:0005622,GO:0005737,GO:0005829,GO:0005886,GO:0006790,GO:0006807,GO:0008150,GO:0008152,GO:0009987,GO:0010467,GO:0016020,GO:0016043,GO:0016226,GO:0019538,GO:0022607,GO:0031163,GO:0043167,GO:0043169,GO:0043170,GO:0044085,GO:0044237,GO:0044238,GO:0046872,GO:0046914,GO:0051536,GO:0051537,GO:0051539,GO:0051540,GO:0051604,GO:0071704,GO:0071840,GO:0071944,GO:…	-	COG0316-Uncharacterized conserved protein[S]
GE04400	128.29	1409.4	-3.4576	1.89e-178	1.49e-176	down	GE04400	hypothetical protein	-	-	-
GE02467	94.41	740.14	-2.97079	2.93e-173	2.24e-171	down	GE02467	Inner membrane protein YjcH	-	-	COG3162-Predicted membrane protein[S]
GE02035	171.01	362.84	-1.08525	3.09e-170	2.32e-168	down	GE02035	Dihydrolipoyllysine-residue succinyltransferase component of 2-oxoglutarate dehydrogenase complex	GO:0000287,GO:0003674,GO:0003824,GO:0005488,GO:0005575,GO:0005618,GO:0005622,GO:0005737,GO:0005829,GO:0005886,GO:0006082,GO:0006091,GO:0006099,GO:0006101,GO:0006103,GO:0008150,GO:0008152,GO:0008683,GO:0009055,GO:0009060,GO:0009987,GO:0015980,GO:0016020,GO:0016491,GO:0016740,GO:0016744,GO:0016829,GO:0016830,GO:0016831,GO:0016999,GO:0017144,GO:0019752,GO:0022900,GO:0030312,GO:0032991,GO:0040007,GO:…	-	COG0567-2-oxoglutarate dehydrogenase complex, dehydrogenase (E1) component, and related enzymes[C]
GE03810	95.95	637.94	-2.73307	3.78e-170	2.8e-168	down	GE03810	50S ribosomal protein L9	GO:0003674,GO:0003676,GO:0003723,GO:0005488,GO:0005575,GO:0005618,GO:0005622,GO:0005737,GO:0005829,GO:0005840,GO:0005886,GO:0006412,GO:0006518,GO:0006807,GO:0008150,GO:0008152,GO:0009058,GO:0009059,GO:0009987,GO:0010467,GO:0015934,GO:0016020,GO:0019538,GO:0022625,GO:0022626,GO:0030312,GO:0032991,GO:0034641,GO:0034645,GO:0043043,GO:0043170,GO:0043226,GO:0043228,GO:0043229,GO:0043232,GO:0043603,GO:…	K02939-ko03010 Ribosome	COG0359-Ribosomal protein L9[J]
GE01120	233.34	1101.86	-2.23944	1.03e-167	7.52e-166	down	GE01120	RNA polymerase-binding protein RbpA	GO:0001000,GO:0001098,GO:0001108,GO:0003674,GO:0005488,GO:0005515,GO:0006355,GO:0008150,GO:0008270,GO:0009889,GO:0009891,GO:0009893,GO:0010468,GO:0010556,GO:0010557,GO:0010604,GO:0010628,GO:0019219,GO:0019222,GO:0019899,GO:0031323,GO:0031325,GO:0031326,GO:0031328,GO:0042221,GO:0043167,GO:0043169,GO:0043175,GO:0045893,GO:0045935,GO:0046677,GO:0046872,GO:0046914,GO:0048518,GO:0048522,GO:0050789,GO:…	-	-
GE01024	49.75	265.99	-2.4186	9.64e-165	6.8e-163	down	GE01024	Arginine biosynthesis bifunctional protein ArgJ beta chain	GO:0003674,GO:0003824,GO:0004042,GO:0004358,GO:0005575,GO:0005622,GO:0005737,GO:0006082,GO:0006520,GO:0006525,GO:0006526,GO:0006591,GO:0006592,GO:0006807,GO:0008080,GO:0008150,GO:0008152,GO:0008652,GO:0009058,GO:0009064,GO:0009084,GO:0009987,GO:0016053,GO:0016407,GO:0016410,GO:0016740,GO:0016746,GO:0016747,GO:0019752,GO:0040007,GO:0043436,GO:0044237,GO:0044238,GO:0044249,GO:0044281,GO:0044283,GO:…	K00620-ko01210 2-Oxocarboxylic acid metabolism;ko01230 Biosynthesis of amino acids;ko00220 Arginine biosynthesis	COG1364-N-acetylglutamate synthase (N-acetylornithine aminotransferase)[E]
GE01174	229.81	600.61	-1.38599	1.66e-163	1.15e-161	down	GE01174	Pup--protein ligase	GO:0000166,GO:0000302,GO:0003674,GO:0003824,GO:0005488,GO:0005524,GO:0005575,GO:0005618,GO:0005886,GO:0006464,GO:0006508,GO:0006807,GO:0006950,GO:0006979,GO:0008144,GO:0008150,GO:0008152,GO:0009056,GO:0009057,GO:0009405,GO:0009987,GO:0010035,GO:0010498,GO:0016020,GO:0016740,GO:0016874,GO:0016879,GO:0016881,GO:0017076,GO:0018193,GO:0018205,GO:0019538,GO:0019787,GO:0019941,GO:0030163,GO:0030312,GO:…	-	-
GE00302	103.59	1515.23	-3.87058	2.08e-162	1.42e-160	down	GE00302	hypothetical protein	-	-	-
GE04876	333.73	1743.24	-2.38502	4.18e-159	2.81e-157	down	GE04876	30S ribosomal protein S14 type Z	GO:0003674,GO:0003735,GO:0005198,GO:0005575,GO:0005622,GO:0005737,GO:0005840,GO:0006412,GO:0006518,GO:0006807,GO:0008150,GO:0008152,GO:0009058,GO:0009059,GO:0009987,GO:0010467,GO:0015935,GO:0019538,GO:0032991,GO:0034641,GO:0034645,GO:0043043,GO:0043170,GO:0043226,GO:0043228,GO:0043229,GO:0043232,GO:0043603,GO:0043604,GO:0044237,GO:0044238,GO:0044249,GO:0044260,GO:0044267,GO:0044271,GO:0044391,GO:…	K02954-ko03010 Ribosome	COG0199-Ribosomal protein S14[J]
GE03807	240.23	1164.44	-2.27715	2.37e-154	1.55e-152	down	GE03807	30S ribosomal protein S6	GO:0003674,GO:0003676,GO:0003723,GO:0003735,GO:0005198,GO:0005488,GO:0005575,GO:0005618,GO:0005622,GO:0005737,GO:0005829,GO:0005840,GO:0005886,GO:0015935,GO:0016020,GO:0019843,GO:0022626,GO:0022627,GO:0030312,GO:0032991,GO:0043226,GO:0043228,GO:0043229,GO:0043232,GO:0044391,GO:0070181,GO:0071944,GO:0097159,GO:1901363,GO:1990904	K02990-ko03010 Ribosome	COG0360-Ribosomal protein S6[J]
GE00337	26.94	224.36	-3.05799	7.8e-151	4.89e-149	down	GE00337	Ribonucleoside-diphosphate reductase subunit beta nrdF2	GO:0005575,GO:0005622,GO:0005737,GO:0005829,GO:0005971,GO:0006139,GO:0006259,GO:0006260,GO:0006725,GO:0006753,GO:0006793,GO:0006796,GO:0006807,GO:0008150,GO:0008152,GO:0009058,GO:0009059,GO:0009117,GO:0009165,GO:0009262,GO:0009263,GO:0009987,GO:0018130,GO:0019438,GO:0019637,GO:0032991,GO:0034641,GO:0034645,GO:0034654,GO:0040007,GO:0043170,GO:0044237,GO:0044238,GO:0044249,GO:0044260,GO:0044271,GO:…	K00526-ko00230 Purine metabolism;ko00240 Pyrimidine metabolism	COG0208-Ribonucleotide reductase, beta subunit[F]
GE04882	228.24	904.54	-1.98663	5.24e-150	3.24e-148	down	GE04882	50S ribosomal protein L15	GO:0003674,GO:0003735,GO:0005198,GO:0005575,GO:0005622,GO:0005737,GO:0005829,GO:0005840,GO:0005886,GO:0015934,GO:0016020,GO:0022625,GO:0022626,GO:0032991,GO:0043226,GO:0043228,GO:0043229,GO:0043232,GO:0044391,GO:0071944,GO:1990904	K02876-ko03010 Ribosome	COG0200-Ribosomal protein L15[J]
GE04852	14.48	47.35	-1.7093	1.76e-149	1.08e-147	down	GE04852	ATP-dependent leucine adenylase	-	-	COG1020-Non-ribosomal peptide synthetase modules and related proteins[Q]
GE04892	17.2	182.63	-3.40844	5.37e-145	3.19e-143	down	GE04892	DNA-directed RNA polymerase subunit alpha	GO:0003674,GO:0003824,GO:0003899,GO:0005575,GO:0005618,GO:0005622,GO:0005737,GO:0005829,GO:0005886,GO:0006139,GO:0006351,GO:0006354,GO:0006725,GO:0006807,GO:0008150,GO:0008152,GO:0009058,GO:0009059,GO:0009987,GO:0010467,GO:0016020,GO:0016070,GO:0016740,GO:0016772,GO:0016779,GO:0018130,GO:0019438,GO:0030312,GO:0032774,GO:0034062,GO:0034641,GO:0034645,GO:0034654,GO:0040007,GO:0043170,GO:0044237,GO:…	K03040-ko00230 Purine metabolism;ko00240 Pyrimidine metabolism;ko03020 RNA polymerase	COG0202-DNA-directed RNA polymerase, alpha subunit/40 kD subunit[K]
GE01815	303.02	1115.18	-1.87979	4.43e-143	2.56e-141	down	GE01815	hypothetical protein	-	-	-
GE03134	109.3	269.88	-1.30402	7.26e-141	4.15e-139	down	GE03134	DNA topoisomerase 1	GO:0000287,GO:0003674,GO:0003824,GO:0003916,GO:0003917,GO:0005488,GO:0005575,GO:0005618,GO:0005622,GO:0005737,GO:0005829,GO:0005886,GO:0008150,GO:0009892,GO:0010605,GO:0016020,GO:0016853,GO:0019219,GO:0019222,GO:0030312,GO:0031323,GO:0031324,GO:0032069,GO:0032074,GO:0040007,GO:0043086,GO:0043167,GO:0043169,GO:0044092,GO:0045934,GO:0046872,GO:0048519,GO:0048523,GO:0050789,GO:0050790,GO:0050794,GO:…	-	COG0550-Topoisomerase IA[L]
GE04132	224.92	641.66	-1.5124	2.36e-140	1.3e-138	down	GE04132	putative protein Mb0909	-	-	-
GE02827	577.75	1997.78	-1.78988	1.63e-137	8.86e-136	down	GE02827	hypothetical protein	-	-	-
GE04871	75.48	773.77	-3.35774	6.66e-135	3.54e-133	down	GE04871	50S ribosomal protein L29	GO:0005575,GO:0005622,GO:0005737,GO:0005829,GO:0005840,GO:0008150,GO:0015934,GO:0022625,GO:0022626,GO:0032991,GO:0040007,GO:0043226,GO:0043228,GO:0043229,GO:0043232,GO:0044391,GO:1990904	K02904-ko03010 Ribosome	COG0255-Ribosomal protein L29[J]
GE02265	58.28	256.04	-2.1353	2.6e-133	1.35e-131	down	GE02265	Glutamate--cysteine ligase EgtA	-	K01919-ko00270 Cysteine and methionine metabolism;ko00480 Glutathione metabolism	COG3572-Gamma-glutamylcysteine synthetase[H]
GE01171	56.84	631.91	-3.47474	3.78e-131	1.94e-129	down	GE01171	Sec-independent protein translocase protein TatA	GO:0008150,GO:0040007	K03116-ko03060 Protein export;ko03070 Bacterial secretion system	-
GE00208	455.77	931.93	-1.03192	1.82e-129	9.25e-128	down	GE00208	Stearoyl-CoA 9-desaturase	GO:0001676,GO:0003674,GO:0003824,GO:0005575,GO:0005886,GO:0006082,GO:0006629,GO:0006631,GO:0006633,GO:0008150,GO:0008152,GO:0008610,GO:0009058,GO:0009987,GO:0016020,GO:0016053,GO:0016213,GO:0016215,GO:0016491,GO:0016705,GO:0016717,GO:0019752,GO:0032787,GO:0042759,GO:0043436,GO:0044237,GO:0044238,GO:0044249,GO:0044255,GO:0044281,GO:0044283,GO:0046394,GO:0055114,GO:0071704,GO:0071944,GO:0072330,GO:…	-	COG3239-Fatty acid desaturase[I]
GE00809	550.56	1665.85	-1.59729	7.32e-125	3.63e-123	down	GE00809	putative protein Rv0250c	-	-	-
GE02953	205.74	519.83	-1.33722	7.88e-124	3.86e-122	down	GE02953	Steroid C26-monooxygenase	-	K15981-ko00984 Steroid degradation	COG2124-Cytochrome P450[Q]
GE03560	23.55	286.5	-3.60474	1.05e-123	5.09e-122	down	GE03560	Ferritin BfrB	GO:0001666,GO:0003674,GO:0003824,GO:0004322,GO:0005488,GO:0005506,GO:0005575,GO:0005576,GO:0005618,GO:0005622,GO:0005737,GO:0005829,GO:0005886,GO:0006873,GO:0006875,GO:0006879,GO:0006880,GO:0006950,GO:0008150,GO:0008152,GO:0009628,GO:0009987,GO:0016020,GO:0016491,GO:0016722,GO:0016724,GO:0019725,GO:0030003,GO:0030312,GO:0033212,GO:0033214,GO:0036293,GO:0042592,GO:0043167,GO:0043169,GO:0046872,GO:…	-	COG1528-Ferritin-like protein[P]
GE01431	52.64	319.02	-2.59942	1.51e-122	7.27e-121	down	GE01431	putative protein MSMEG_2782/MSMEI_2713	-	-	COG3253-Uncharacterized conserved protein[S]
GE04872	77.03	628.52	-3.02847	4.21e-121	1.98e-119	down	GE04872	30S ribosomal protein S17	GO:0003674,GO:0003735,GO:0005198,GO:0005575,GO:0005622,GO:0005737,GO:0005829,GO:0005840,GO:0005886,GO:0006412,GO:0006518,GO:0006807,GO:0008150,GO:0008152,GO:0009058,GO:0009059,GO:0009987,GO:0010467,GO:0015935,GO:0016020,GO:0019538,GO:0022626,GO:0022627,GO:0032991,GO:0034641,GO:0034645,GO:0040007,GO:0043043,GO:0043170,GO:0043226,GO:0043228,GO:0043229,GO:0043232,GO:0043603,GO:0043604,GO:0044237,GO:…	K02961-ko03010 Ribosome	COG0186-Ribosomal protein S17[J]
GE03665	31.48	96.5	-1.61609	6.87e-119	3.2e-117	down	GE03665	Glutamate synthase large chain	GO:0003674,GO:0003824,GO:0005575,GO:0005622,GO:0005737,GO:0005829,GO:0005886,GO:0006082,GO:0006520,GO:0006536,GO:0006537,GO:0006541,GO:0006807,GO:0008150,GO:0008152,GO:0008652,GO:0009058,GO:0009064,GO:0009084,GO:0009987,GO:0015930,GO:0016020,GO:0016053,GO:0016491,GO:0016638,GO:0019676,GO:0019740,GO:0019752,GO:0040007,GO:0043436,GO:0043648,GO:0043650,GO:0044237,GO:0044238,GO:0044249,GO:0044281,GO:…	K00265-ko01230 Biosynthesis of amino acids;ko00910 Nitrogen metabolism;ko00250 Alanine, aspartate and glutamate metabolism	COG0069-Glutamate synthase domain 2[E]
GE04306	83.24	256.69	-1.62468	3.82e-117	1.76e-115	down	GE04306	hypothetical protein	-	-	-
GE02930	90.12	286.26	-1.66741	4.07e-112	1.85e-110	down	GE02930	hypothetical protein	-	K02067-ko02010 ABC transporters	COG1463-ABC-type transport system involved in resistance to organic solvents, periplasmic component[Q]
GE01444	69.69	231.32	-1.73087	1.2e-111	5.39e-110	down	GE01444	Oleate hydratase	-	-	COG4716-Myosin-crossreactive antigen[S]
GE02364	98.05	705.89	-2.84785	2.72e-111	1.21e-109	down	GE02364	30S ribosomal protein S18 2	GO:0003674,GO:0003735,GO:0005198,GO:0005575,GO:0005618,GO:0005622,GO:0005737,GO:0005829,GO:0005840,GO:0005886,GO:0006412,GO:0006518,GO:0006807,GO:0008150,GO:0008152,GO:0009058,GO:0009059,GO:0009987,GO:0010467,GO:0015935,GO:0016020,GO:0019538,GO:0022626,GO:0022627,GO:0030312,GO:0032991,GO:0034641,GO:0034645,GO:0043043,GO:0043170,GO:0043226,GO:0043228,GO:0043229,GO:0043232,GO:0043603,GO:0043604,GO:…	K02963-ko03010 Ribosome	COG0238-Ribosomal protein S18[J]
GE03567	164.95	547.87	-1.7318	6.06e-111	2.68e-109	down	GE03567	Peptide methionine sulfoxide reductase MsrA 1	-	-	COG0225-Peptide methionine sulfoxide reductase[O]
GE02239	32.43	408.39	-3.65455	2.05e-110	9e-109	down	GE02239	hypothetical protein	-	-	COG2388-Predicted acetyltransferase[R]
trna17	3383.62	8016.86	-1.24447	4.07e-110	1.76e-108	down	trna17	tRNA-Tyr	-	-	-
GE00049	207.02	761.83	-1.8797	6.69e-107	2.85e-105	down	GE00049	putative protein ML0386	-	-	-
GE00335	33.81	321.62	-3.24984	1.43e-105	6.04e-104	down	GE00335	Protein NrdI	GO:0000166,GO:0003674,GO:0005488,GO:0006464,GO:0006807,GO:0008150,GO:0008152,GO:0009987,GO:0010181,GO:0019538,GO:0032553,GO:0036094,GO:0036211,GO:0043167,GO:0043168,GO:0043170,GO:0043412,GO:0044237,GO:0044238,GO:0044260,GO:0044267,GO:0071704,GO:0097159,GO:0097367,GO:1901265,GO:1901363,GO:1901564	-	COG1780-Protein involved in ribonucleotide reduction[F]
GE02100	60	520.59	-3.11711	8.92e-104	3.73e-102	down	GE02100	Putative pterin-4-alpha-carbinolamine dehydratase	-	-	COG2154-Pterin-4a-carbinolamine dehydratase[H]
GE01105	163.77	407.96	-1.31676	1.1e-103	4.56e-102	down	GE01105	NADH dehydrogenase-like protein SH2010	-	K03885-ko00190 Oxidative phosphorylation	COG1252-NADH dehydrogenase, FAD-containing subunit[C]
GE01023	31.44	179.15	-2.51049	1.14e-102	4.68e-101	down	GE01023	N-acetyl-gamma-glutamyl-phosphate reductase	GO:0000166,GO:0003674,GO:0005488,GO:0008150,GO:0036094,GO:0040007,GO:0043167,GO:0043168,GO:0050661,GO:0070401,GO:0097159,GO:1901265,GO:1901363	K00145-ko01210 2-Oxocarboxylic acid metabolism;ko01230 Biosynthesis of amino acids;ko00220 Arginine biosynthesis	COG0002-Acetylglutamate semialdehyde dehydrogenase[E]
GE02932	23.66	164.63	-2.79871	7.48e-102	3.04e-100	down	GE02932	hypothetical protein	-	K02067-ko02010 ABC transporters	COG1463-ABC-type transport system involved in resistance to organic solvents, periplasmic component[Q]
GE01729	36.45	153.14	-2.07086	1.58e-101	6.38e-100	down	GE01729	ATP synthase subunit alpha	GO:0005575,GO:0005618,GO:0005886,GO:0008150,GO:0016020,GO:0030312,GO:0040007,GO:0071944	K02111-ko00190 Oxidative phosphorylation;ko00195 Photosynthesis	COG0056-F0F1-type ATP synthase, alpha subunit[C]
GE01075	20.03	97.9	-2.28915	7.78e-100	3.08e-98	down	GE01075	Malate synthase G	-	K01638-ko01200 Carbon metabolism;ko00620 Pyruvate metabolism;ko00630 Glyoxylate and dicarboxylate metabolism	COG2225-Malate synthase[C]
GE04722	0.78	125.02	-7.32447	2.62e-99	1.03e-97	down	GE04722	Daunorubicin/doxorubicin resistance ABC transporter permease protein DrrB	-	-	COG0842-ABC-type multidrug transport system, permease component[V]
GE03075	190.08	414.29	-1.12403	6.19e-99	2.41e-97	down	GE03075	ATP-dependent Clp protease ATP-binding subunit ClpC1	GO:0003674,GO:0003824,GO:0005488,GO:0005515,GO:0005575,GO:0005618,GO:0005622,GO:0005737,GO:0005829,GO:0005886,GO:0006457,GO:0008150,GO:0009987,GO:0016020,GO:0016462,GO:0016787,GO:0016817,GO:0016818,GO:0016887,GO:0017111,GO:0030312,GO:0040007,GO:0042802,GO:0042803,GO:0044183,GO:0046983,GO:0071944	-	COG0542-ATPases with chaperone activity, ATP-binding subunit[O]
GE04632	80.89	330.71	-2.03153	9.61e-99	3.71e-97	down	GE04632	HTH-type transcriptional regulator ZntR-like protein	-	-	COG0789-Predicted transcriptional regulators[K]
GE01447	32.44	184.01	-2.50394	3.26e-96	1.23e-94	down	GE01447	Daunorubicin/doxorubicin resistance ATP-binding protein DrrA	-	-	COG1131-ABC-type multidrug transport system, ATPase component[V]
GE03680	42.04	176.97	-2.07367	9e-96	3.36e-94	down	GE03680	FHA domain-containing protein FhaA	GO:0003674,GO:0003676,GO:0003723,GO:0003729,GO:0005488,GO:0005575,GO:0005618,GO:0005622,GO:0005737,GO:0005829,GO:0030312,GO:0071944,GO:0097159,GO:1901363	-	COG1716-FOG: FHA domain[T]
GE01001	44.07	146.29	-1.73096	1.03e-95	3.81e-94	down	GE01001	UvrABC system protein B	GO:0002682,GO:0002684,GO:0005575,GO:0005886,GO:0006950,GO:0008150,GO:0009605,GO:0009607,GO:0016020,GO:0035821,GO:0043207,GO:0044003,GO:0044403,GO:0044419,GO:0048518,GO:0048583,GO:0048584,GO:0050776,GO:0050778,GO:0050789,GO:0050896,GO:0051409,GO:0051701,GO:0051704,GO:0051707,GO:0051817,GO:0052031,GO:0052173,GO:0052200,GO:0052553,GO:0052572,GO:0065007,GO:0071944,GO:0075136	K03702-ko03420 Nucleotide excision repair	COG0556-Helicase subunit of the DNA excision repair complex[L]
GE01692	51.69	331.97	-2.6831	2.89e-94	1.06e-92	down	GE01692	30S ribosomal protein S16	GO:0003674,GO:0003735,GO:0005198,GO:0005575,GO:0005622,GO:0005737,GO:0005840,GO:0005886,GO:0006412,GO:0006518,GO:0006807,GO:0008150,GO:0008152,GO:0009058,GO:0009059,GO:0009987,GO:0010467,GO:0015935,GO:0016020,GO:0019538,GO:0032991,GO:0034641,GO:0034645,GO:0043043,GO:0043170,GO:0043226,GO:0043228,GO:0043229,GO:0043232,GO:0043603,GO:0043604,GO:0044237,GO:0044238,GO:0044249,GO:0044260,GO:0044267,GO:…	K02959-ko03010 Ribosome	COG0228-Ribosomal protein S16[J]
GE02929	75.33	249.63	-1.72849	2.15e-93	7.82e-92	down	GE02929	hypothetical protein	-	K02067-ko02010 ABC transporters	COG1463-ABC-type transport system involved in resistance to organic solvents, periplasmic component[Q]
GE02904	29.39	748.63	-4.67086	2.91e-93	1.05e-91	down	GE02904	hypothetical protein	-	-	-
GE03510	479.44	1167.25	-1.28369	1.1e-92	3.94e-91	down	GE03510	hypothetical protein	-	-	-
GE01026	56.66	212.92	-1.90991	1.21e-92	4.28e-91	down	GE01026	Acetylornithine aminotransferase	GO:0003674,GO:0005488,GO:0005515,GO:0008144,GO:0008150,GO:0019842,GO:0030170,GO:0036094,GO:0040007,GO:0042802,GO:0043167,GO:0043168,GO:0070279,GO:0097159,GO:1901363	K00821-ko01210 2-Oxocarboxylic acid metabolism;ko01230 Biosynthesis of amino acids;ko00300 Lysine biosynthesis;ko00220 Arginine biosynthesis	COG4992-Ornithine/acetylornithine aminotransferase[E]
GE01275	73.93	230.25	-1.63897	4.45e-92	1.57e-90	down	GE01275	FeS cluster assembly protein SufB	GO:0003674,GO:0003824,GO:0004518,GO:0004519,GO:0005575,GO:0005622,GO:0005737,GO:0005829,GO:0006139,GO:0006725,GO:0006807,GO:0008150,GO:0008152,GO:0009987,GO:0016787,GO:0016788,GO:0034641,GO:0040007,GO:0043170,GO:0044237,GO:0044238,GO:0046483,GO:0071704,GO:0090304,GO:0090305,GO:1901360	-	COG0719-ABC-type transport system involved in Fe-S cluster assembly, permease component[O]
GE03664	165.21	387.21	-1.22882	4.65e-91	1.63e-89	down	GE03664	Glutamate synthase small chain	GO:0005575,GO:0005622,GO:0005737,GO:0005829,GO:0005886,GO:0008150,GO:0016020,GO:0040007,GO:0071944	K00266-ko01230 Biosynthesis of amino acids;ko00910 Nitrogen metabolism;ko00250 Alanine, aspartate and glutamate metabolism	COG0493-NADPH-dependent glutamate synthase beta chain and related oxidoreductases[ER]
GE04870	85.28	440.93	-2.37027	2.64e-90	9.08e-89	down	GE04870	50S ribosomal protein L16	GO:0003674,GO:0003676,GO:0003723,GO:0003735,GO:0005198,GO:0005488,GO:0005575,GO:0005622,GO:0005737,GO:0005829,GO:0005840,GO:0005886,GO:0008150,GO:0015934,GO:0016020,GO:0019843,GO:0022625,GO:0022626,GO:0032991,GO:0040007,GO:0043226,GO:0043228,GO:0043229,GO:0043232,GO:0044391,GO:0071944,GO:0097159,GO:1901363,GO:1990904	K02878-ko03010 Ribosome	COG0197-Ribosomal protein L16/L10E[J]
GE03327	26.36	136.39	-2.37132	6.7e-90	2.29e-88	down	GE03327	NADH dehydrogenase	-	K03885-ko00190 Oxidative phosphorylation	COG1252-NADH dehydrogenase, FAD-containing subunit[C]
GE02107	470.98	1413.88	-1.58592	9.02e-90	3.06e-88	down	GE02107	hypothetical protein	-	-	-
GE00478	30.92	156.18	-2.3366	3.8e-89	1.28e-87	down	GE00478	Stearoyl-CoA 9-desaturase	-	-	COG3239-Fatty acid desaturase[I]
GE04831	82.31	237.81	-1.53067	6.15e-89	2.06e-87	down	GE04831	EPTC-inducible aldehyde dehydrogenase	GO:0005575,GO:0005886,GO:0008150,GO:0009605,GO:0009607,GO:0016020,GO:0035821,GO:0043207,GO:0044003,GO:0044403,GO:0044419,GO:0050896,GO:0051701,GO:0051704,GO:0051707,GO:0051817,GO:0052031,GO:0052173,GO:0052200,GO:0052553,GO:0052562,GO:0052572,GO:0071944,GO:0075136	K00138-ko00010 Glycolysis / Gluconeogenesis;ko00620 Pyruvate metabolism	COG1012-NAD-dependent aldehyde dehydrogenases[C]
GE01300	28.31	162.97	-2.52522	6.66e-89	2.21e-87	down	GE01300	Glyceraldehyde-3-phosphate dehydrogenase	GO:0000166,GO:0003674,GO:0003824,GO:0004365,GO:0005488,GO:0008150,GO:0008152,GO:0016491,GO:0016620,GO:0016903,GO:0036094,GO:0043891,GO:0051287,GO:0055114,GO:0097159,GO:1901265,GO:1901363	K00134-ko01200 Carbon metabolism;ko01230 Biosynthesis of amino acids;ko00010 Glycolysis / Gluconeogenesis;ko00710 Carbon fixation in photosynthetic organisms;ko04066 HIF-1 signaling pathway;ko05010 Alzheimer's disease	COG0057-Glyceraldehyde-3-phosphate dehydrogenase/erythrose-4-phosphate dehydrogenase[G]
GE00528	284.18	589.47	-1.05261	1e-88	3.31e-87	down	GE00528	ATP-dependent Clp protease ATP-binding subunit ClpX	GO:0000166,GO:0003674,GO:0003824,GO:0004176,GO:0005488,GO:0005524,GO:0005575,GO:0005618,GO:0006508,GO:0006807,GO:0008144,GO:0008150,GO:0008152,GO:0008233,GO:0009056,GO:0009057,GO:0009987,GO:0016462,GO:0016787,GO:0016817,GO:0016818,GO:0016887,GO:0017076,GO:0017111,GO:0019538,GO:0030163,GO:0030312,GO:0030554,GO:0031333,GO:0032271,GO:0032272,GO:0032553,GO:0032555,GO:0032559,GO:0035639,GO:0036094,GO:…	K03544-ko04112 Cell cycle - Caulobacter	COG1219-ATP-dependent protease Clp, ATPase subunit[O]
GE02829	236.8	484.75	-1.03357	7.95e-87	2.6e-85	down	GE02829	Amidophosphoribosyltransferase	GO:0008150,GO:0040007	K00764-ko00230 Purine metabolism;ko00250 Alanine, aspartate and glutamate metabolism	COG0034-Glutamine phosphoribosylpyrophosphate amidotransferase[F]
GE05002	214.63	901.2	-2.07	2.31e-86	7.51e-85	down	GE05002	hypothetical protein	-	-	-
GE00774	100.24	251.95	-1.32968	1.12e-84	3.62e-83	down	GE00774	Alpha-peptide	-	K00156-ko00620 Pyruvate metabolism	COG0028-Thiamine pyrophosphate-requiring enzymes [acetolactate synthase, pyruvate dehydrogenase (cytochrome), glyoxylate carboligase, phosphonopyruvate decarboxylase][EH]
GE02341	319.16	1335.06	-2.06455	6.24e-84	2e-82	down	GE02341	hypothetical protein	-	-	-
GE01029	56.04	202.35	-1.85232	1.31e-82	4.17e-81	down	GE01029	Argininosuccinate synthase	GO:0000050,GO:0000053,GO:0003674,GO:0003824,GO:0004055,GO:0005575,GO:0005622,GO:0005737,GO:0005829,GO:0005886,GO:0006082,GO:0006520,GO:0006525,GO:0006526,GO:0006575,GO:0006807,GO:0008150,GO:0008152,GO:0008652,GO:0009058,GO:0009064,GO:0009084,GO:0009987,GO:0016020,GO:0016053,GO:0016874,GO:0016879,GO:0019627,GO:0019752,GO:0034641,GO:0040007,GO:0043436,GO:0043603,GO:0043604,GO:0044237,GO:0044238,GO:…	K01940-ko01230 Biosynthesis of amino acids;ko00250 Alanine, aspartate and glutamate metabolism;ko00220 Arginine biosynthesis	COG0137-Argininosuccinate synthase[E]
GE04881	52.69	589.26	-3.4833	1.45e-81	4.57e-80	down	GE04881	50S ribosomal protein L30	GO:0005575,GO:0005622,GO:0005737,GO:0005829,GO:0005840,GO:0008150,GO:0015934,GO:0022625,GO:0022626,GO:0032991,GO:0040007,GO:0043226,GO:0043228,GO:0043229,GO:0043232,GO:0044391,GO:1990904	K02907-ko03010 Ribosome	COG1841-Ribosomal protein L30/L7E[J]
GE01259	33.38	103.47	-1.63216	7.45e-80	2.33e-78	down	GE01259	Aconitate hydratase	GO:0003674,GO:0003676,GO:0003723,GO:0003729,GO:0003730,GO:0003824,GO:0003994,GO:0005488,GO:0005506,GO:0005575,GO:0005576,GO:0005618,GO:0005622,GO:0005737,GO:0005739,GO:0005829,GO:0005886,GO:0006082,GO:0006091,GO:0006099,GO:0006101,GO:0006629,GO:0006631,GO:0008150,GO:0008152,GO:0008198,GO:0009060,GO:0009987,GO:0010035,GO:0010038,GO:0010039,GO:0015980,GO:0016020,GO:0016829,GO:0016835,GO:0016836,GO:…	K01681-ko01200 Carbon metabolism;ko01210 2-Oxocarboxylic acid metabolism;ko01230 Biosynthesis of amino acids;ko00020 Citrate cycle (TCA cycle);ko00630 Glyoxylate and dicarboxylate metabolism;ko00720 Carbon fixation pathways in prokaryotes	COG1048-Aconitase A[C]
GE01682	22.06	285.41	-3.69353	4.19e-79	1.3e-77	down	GE01682	50S ribosomal protein L19	GO:0003674,GO:0003735,GO:0005198,GO:0005575,GO:0005622,GO:0005737,GO:0005829,GO:0005840,GO:0005886,GO:0008150,GO:0015934,GO:0016020,GO:0022625,GO:0022626,GO:0032991,GO:0040007,GO:0043226,GO:0043228,GO:0043229,GO:0043232,GO:0044391,GO:0071944,GO:1990904	K02884-ko03010 Ribosome	COG0335-Ribosomal protein L19[J]
GE01473	54.34	366.82	-2.75499	2.11e-78	6.52e-77	down	GE01473	hypothetical protein	-	-	-
GE00598	68.4	238	-1.79889	1.85e-77	5.64e-76	down	GE00598	PhoH-like protein	GO:0005575,GO:0005886,GO:0016020,GO:0071944	-	COG1702-Phosphate starvation-inducible protein PhoH, predicted ATPase[T]
GE01272	208.71	453.96	-1.12107	2.43e-77	7.37e-76	down	GE01272	putative cysteine desulfurase	GO:0005575,GO:0005886,GO:0008150,GO:0016020,GO:0040007,GO:0071944	K11717-ko00450 Selenocompound metabolism	COG0520-Selenocysteine lyase[E]
GE03728	58.74	130.58	-1.15252	5.38e-77	1.62e-75	down	GE03728	putative peptidoglycan biosynthesis protein MviN	GO:0003674,GO:0005215,GO:0005575,GO:0005576,GO:0005886,GO:0005887,GO:0006810,GO:0006855,GO:0008150,GO:0015893,GO:0016020,GO:0016021,GO:0022857,GO:0031224,GO:0031226,GO:0042221,GO:0042493,GO:0046677,GO:0050896,GO:0051179,GO:0051234,GO:0055085,GO:0071944	K03980-ko00550 Peptidoglycan biosynthesis	COG0728-Uncharacterized membrane protein, putative virulence factor[R]
GE02806	10.23	111.2	-3.44228	9.64e-77	2.88e-75	down	GE02806	Phosphate transport system permease protein PstA	GO:0008150,GO:0040007,GO:0044110,GO:0044117,GO:0044403,GO:0044419,GO:0051704	K02038-ko02010 ABC transporters	COG0581-ABC-type phosphate transport system, permease component[P]
GE01741	68.11	180.1	-1.40286	2.37e-76	7.05e-75	down	GE01741	Transcription termination factor Rho	-	K03628-ko03018 RNA degradation	COG1158-Transcription termination factor[K]
GE01465	30.15	130.08	-2.10917	6.26e-75	1.84e-73	down	GE01465	RNA polymerase sigma factor SigA	GO:0001101,GO:0003674,GO:0003676,GO:0003677,GO:0005488,GO:0005575,GO:0005618,GO:0005886,GO:0006355,GO:0008150,GO:0009405,GO:0009415,GO:0009628,GO:0009889,GO:0010035,GO:0010468,GO:0010556,GO:0016020,GO:0016987,GO:0019219,GO:0019222,GO:0030312,GO:0031323,GO:0031326,GO:0040007,GO:0042221,GO:0043254,GO:0044087,GO:0044419,GO:0050789,GO:0050794,GO:0050896,GO:0051128,GO:0051171,GO:0051252,GO:0051704,GO:…	-	COG0568-DNA-directed RNA polymerase, sigma subunit (sigma70/sigma32)[K]
GE01726	241.82	743.82	-1.62102	7.84e-75	2.28e-73	down	GE01726	ATP synthase epsilon chain	GO:0005575,GO:0005618,GO:0005622,GO:0005886,GO:0006139,GO:0006163,GO:0006164,GO:0006725,GO:0006753,GO:0006754,GO:0006793,GO:0006796,GO:0006807,GO:0006810,GO:0006811,GO:0006812,GO:0008150,GO:0008152,GO:0009058,GO:0009117,GO:0009123,GO:0009124,GO:0009126,GO:0009127,GO:0009141,GO:0009142,GO:0009144,GO:0009145,GO:0009150,GO:0009152,GO:0009156,GO:0009161,GO:0009165,GO:0009167,GO:0009168,GO:0009199,GO:…	K02114-ko00190 Oxidative phosphorylation;ko00195 Photosynthesis	COG0355-F0F1-type ATP synthase, epsilon subunit (mitochondrial delta subunit)[C]
GE01732	92.37	542.67	-2.55458	1.45e-74	4.19e-73	down	GE01732	ATP synthase subunit c	GO:0003674,GO:0003824,GO:0005215,GO:0005575,GO:0005622,GO:0006139,GO:0006163,GO:0006164,GO:0006725,GO:0006753,GO:0006754,GO:0006793,GO:0006796,GO:0006807,GO:0006810,GO:0006811,GO:0006812,GO:0008150,GO:0008152,GO:0008324,GO:0009058,GO:0009117,GO:0009123,GO:0009124,GO:0009126,GO:0009127,GO:0009141,GO:0009142,GO:0009144,GO:0009145,GO:0009150,GO:0009152,GO:0009156,GO:0009161,GO:0009165,GO:0009167,GO:…	K02110-ko00190 Oxidative phosphorylation;ko00195 Photosynthesis	COG0636-F0F1-type ATP synthase, subunit c/Archaeal/vacuolar-type H+-ATPase, subunit K[C]
GE04893	22.63	197.56	-3.12598	2.9e-74	8.34e-73	down	GE04893	50S ribosomal protein L17	GO:0003674,GO:0003735,GO:0005198,GO:0005575,GO:0005618,GO:0005622,GO:0005737,GO:0005829,GO:0005840,GO:0005886,GO:0015934,GO:0016020,GO:0022625,GO:0022626,GO:0030312,GO:0032991,GO:0043226,GO:0043228,GO:0043229,GO:0043232,GO:0044391,GO:0071944,GO:1990904	K02879-ko03010 Ribosome	COG0203-Ribosomal protein L17[J]
GE04875	110.24	391.61	-1.82877	3.51e-74	1e-72	down	GE04875	50S ribosomal protein L5	GO:0000027,GO:0003674,GO:0003676,GO:0003723,GO:0003735,GO:0005198,GO:0005488,GO:0005575,GO:0005622,GO:0005737,GO:0005829,GO:0005840,GO:0005886,GO:0006412,GO:0006518,GO:0006807,GO:0006996,GO:0008150,GO:0008152,GO:0009058,GO:0009059,GO:0009987,GO:0010467,GO:0015934,GO:0016020,GO:0016043,GO:0019538,GO:0022607,GO:0022613,GO:0022618,GO:0022625,GO:0022626,GO:0032991,GO:0034622,GO:0034641,GO:0034645,GO:…	K02931-ko03010 Ribosome	COG0094-Ribosomal protein L5[J]
GE00526	44.95	238.04	-2.40481	5.37e-73	1.51e-71	down	GE00526	ATP-dependent Clp protease proteolytic subunit 2	GO:0005575,GO:0005622,GO:0005737,GO:0005829,GO:0005886,GO:0016020,GO:0071944	K01358-ko04112 Cell cycle - Caulobacter;ko04212 Longevity regulating pathway - worm	COG0740-Protease subunit of ATP-dependent Clp proteases[OU]
GE01273	19.77	147.34	-2.89776	1.28e-72	3.6e-71	down	GE01273	Vegetative protein 296	-	-	COG0396-ABC-type transport system involved in Fe-S cluster assembly, ATPase component[O]
GE02817	56.74	244.72	-2.10869	1.88e-71	5.21e-70	down	GE02817	UPF0678 fatty acid-binding protein-like protein RHA1_ro04852	GO:0005575,GO:0005886,GO:0016020,GO:0071944	-	-
GE02926	63.34	304.04	-2.26307	2.3e-71	6.32e-70	down	GE02926	putative protein Rv1362c	-	-	-
GE00920	45.09	284.38	-2.65694	5.24e-71	1.43e-69	down	GE00920	hypothetical protein	-	-	-
GE01561	31.93	342.73	-3.42409	2.72e-70	7.4e-69	down	GE01561	30S ribosomal protein S15	GO:0005575,GO:0005622,GO:0005737,GO:0005829,GO:0005840,GO:0005886,GO:0015935,GO:0016020,GO:0022626,GO:0022627,GO:0032991,GO:0043226,GO:0043228,GO:0043229,GO:0043232,GO:0044391,GO:0071944,GO:1990904	K02956-ko03010 Ribosome	COG0184-Ribosomal protein S15P/S13E[J]
GE00343	10.28	67.76	-2.72059	1.01e-69	2.72e-68	down	GE00343	putative cytochrome c oxidase subunit 1-alpha	GO:0006091,GO:0006810,GO:0006811,GO:0006812,GO:0008150,GO:0008152,GO:0009060,GO:0009987,GO:0015672,GO:0015980,GO:0015988,GO:0015990,GO:0022900,GO:0022904,GO:0034220,GO:0044237,GO:0045333,GO:0051179,GO:0051234,GO:0055085,GO:0055114,GO:0098655,GO:0098660,GO:0098662,GO:1902600	K02274-ko00190 Oxidative phosphorylation	COG0843-Heme/copper-type cytochrome/quinol oxidases, subunit 1[C]
GE02837	60.17	301.51	-2.32509	1.19e-69	3.19e-68	down	GE02837	putative protein YnjA	-	-	-
GE01472	52.94	445.07	-3.0716	4.57e-69	1.22e-67	down	GE01472	hypothetical protein	-	-	-
GE01338	6.47	121	-4.2251	7.69e-69	2.04e-67	down	GE01338	Uracil phosphoribosyltransferase	GO:0005575,GO:0005618,GO:0030312,GO:0071944	K02825-ko00240 Pyrimidine metabolism	COG2065-Pyrimidine operon attenuation protein/uracil phosphoribosyltransferase[F]
GE02518	63.85	169.41	-1.40776	1.04e-68	2.76e-67	down	GE02518	putative protein PA3568	-	K01908-ko00640 Propanoate metabolism	COG0365-Acyl-coenzyme A synthetases/AMP-(fatty) acid ligases[I]
GE01263	429.15	1227.39	-1.51604	4.47e-67	1.17e-65	down	GE01263	hypothetical protein	-	-	-
GE00147	27.32	107.63	-1.97805	4.91e-67	1.28e-65	down	GE00147	putative propionyl-CoA carboxylase beta chain 5	GO:0003674,GO:0003824,GO:0003989,GO:0004658,GO:0005488,GO:0005515,GO:0005575,GO:0005618,GO:0005622,GO:0005737,GO:0005886,GO:0006082,GO:0006629,GO:0006631,GO:0008150,GO:0008152,GO:0009056,GO:0009062,GO:0009317,GO:0009987,GO:0015977,GO:0016020,GO:0016042,GO:0016054,GO:0016421,GO:0016874,GO:0016885,GO:0019752,GO:0030312,GO:0032787,GO:0032991,GO:0042802,GO:0043436,GO:0044237,GO:0044238,GO:0044242,GO:…	K01966-ko01200 Carbon metabolism;ko00630 Glyoxylate and dicarboxylate metabolism;ko00640 Propanoate metabolism;ko00280 Valine, leucine and isoleucine degradation	COG4799-Acetyl-CoA carboxylase, carboxyltransferase component (subunits alpha and beta)[I]
GE00050	84.43	216.88	-1.36107	8.24e-66	2.12e-64	down	GE00050	Inosine-5'-monophosphate dehydrogenase	GO:0003674,GO:0003824,GO:0003938,GO:0005575,GO:0005618,GO:0005622,GO:0005737,GO:0005886,GO:0006139,GO:0006163,GO:0006164,GO:0006177,GO:0006183,GO:0006195,GO:0006204,GO:0006725,GO:0006753,GO:0006793,GO:0006796,GO:0006807,GO:0008150,GO:0008152,GO:0009056,GO:0009058,GO:0009116,GO:0009117,GO:0009119,GO:0009123,GO:0009124,GO:0009125,GO:0009126,GO:0009127,GO:0009128,GO:0009141,GO:0009142,GO:0009144,GO:…	K00088-ko00230 Purine metabolism;ko00983 Drug metabolism - other enzymes	COG0516-IMP dehydrogenase/GMP reductase[F]
GE04867	60.38	394.98	-2.70964	1.18e-65	3.03e-64	down	GE04867	30S ribosomal protein S19	GO:0000028,GO:0003674,GO:0003735,GO:0005198,GO:0005575,GO:0005622,GO:0005737,GO:0005829,GO:0005840,GO:0005886,GO:0006996,GO:0008150,GO:0009987,GO:0015935,GO:0016020,GO:0016043,GO:0022607,GO:0022613,GO:0022618,GO:0022626,GO:0022627,GO:0032991,GO:0034622,GO:0040007,GO:0042254,GO:0042255,GO:0042274,GO:0043226,GO:0043228,GO:0043229,GO:0043232,GO:0043933,GO:0044085,GO:0044391,GO:0065003,GO:0070925,GO:…	K02965-ko03010 Ribosome	COG0185-Ribosomal protein S19[J]
GE04755	67.09	228.28	-1.76663	1.68e-65	4.28e-64	down	GE04755	Protease HtpX-like protein	GO:0005575,GO:0005576,GO:0005886,GO:0005887,GO:0016020,GO:0016021,GO:0031224,GO:0031226,GO:0071944	-	COG0501-Zn-dependent protease with chaperone function[O]
GE01701	542.33	1244.41	-1.19822	1.74e-65	4.42e-64	down	GE01701	ATP-dependent Clp protease adapter protein ClpS	-	-	COG2127-Uncharacterized conserved protein[S]
GE01025	7	87.34	-3.64122	5.95e-65	1.49e-63	down	GE01025	Acetylglutamate kinase	GO:0003674,GO:0003824,GO:0003991,GO:0005488,GO:0005575,GO:0005618,GO:0005886,GO:0006082,GO:0006520,GO:0006525,GO:0006526,GO:0006793,GO:0006796,GO:0006807,GO:0008150,GO:0008152,GO:0008652,GO:0009058,GO:0009064,GO:0009084,GO:0009987,GO:0016020,GO:0016053,GO:0016301,GO:0016310,GO:0016597,GO:0016740,GO:0016772,GO:0016774,GO:0019752,GO:0030312,GO:0031406,GO:0034618,GO:0036094,GO:0040007,GO:0043167,GO:…	K00930-ko01210 2-Oxocarboxylic acid metabolism;ko01230 Biosynthesis of amino acids;ko00220 Arginine biosynthesis	COG0548-Acetylglutamate kinase[E]
GE00955	366	849.95	-1.21553	8.59e-65	2.14e-63	down	GE00955	hypothetical protein	-	-	-
GE02942	45.73	140.08	-1.61504	1.82e-64	4.51e-63	down	GE02942	3-oxocholest-4-en-26-oate--CoA ligase	GO:0001676,GO:0003674,GO:0003824,GO:0004467,GO:0005488,GO:0005515,GO:0005575,GO:0005618,GO:0005622,GO:0005737,GO:0005777,GO:0006082,GO:0006629,GO:0006631,GO:0008150,GO:0008152,GO:0008610,GO:0009058,GO:0009273,GO:0009605,GO:0009607,GO:0009987,GO:0015645,GO:0016405,GO:0016874,GO:0016877,GO:0016878,GO:0019752,GO:0030312,GO:0032787,GO:0042546,GO:0042579,GO:0043207,GO:0043226,GO:0043227,GO:0043229,GO:…	-	COG0318-Acyl-CoA synthetases (AMP-forming)/AMP-acid ligases II[IQ]
GE01331	697.63	1501.61	-1.10598	1.54e-63	3.79e-62	down	GE01331	hypothetical protein	-	-	-
GE00772	392.51	1096.09	-1.48156	6.17e-63	1.51e-61	down	GE00772	hypothetical protein	-	-	-
GE01286	55.88	183.45	-1.71498	9.14e-63	2.23e-61	down	GE01286	Transaldolase	GO:0005575,GO:0005576,GO:0005622,GO:0005737,GO:0005829,GO:0008150,GO:0040007	K00616-ko01200 Carbon metabolism;ko01230 Biosynthesis of amino acids;ko00030 Pentose phosphate pathway	COG0176-Transaldolase[G]
GE02494	22.1	91.43	-2.04862	1.17e-62	2.84e-61	down	GE02494	3-oxosteroid 1-dehydrogenase	-	-	-
GE04866	47.81	192.36	-2.00842	1.8e-62	4.34e-61	down	GE04866	50S ribosomal protein L2	GO:0002181,GO:0003674,GO:0003676,GO:0003723,GO:0003735,GO:0005198,GO:0005488,GO:0005575,GO:0005622,GO:0005737,GO:0005829,GO:0005840,GO:0005886,GO:0006412,GO:0006518,GO:0006807,GO:0008150,GO:0008152,GO:0009058,GO:0009059,GO:0009987,GO:0010467,GO:0015934,GO:0016020,GO:0019538,GO:0022625,GO:0022626,GO:0032991,GO:0034641,GO:0034645,GO:0040007,GO:0043043,GO:0043170,GO:0043226,GO:0043228,GO:0043229,GO:…	K02886-ko03010 Ribosome	COG0090-Ribosomal protein L2[J]
GE01011	15.15	57.21	-1.91695	1.33e-61	3.17e-60	down	GE01011	UvrABC system protein A	GO:0000018,GO:0005575,GO:0005618,GO:0005622,GO:0005737,GO:0005829,GO:0005886,GO:0006950,GO:0006974,GO:0008150,GO:0009892,GO:0009987,GO:0010605,GO:0016020,GO:0019219,GO:0019222,GO:0030312,GO:0031323,GO:0031324,GO:0033554,GO:0045910,GO:0045934,GO:0048519,GO:0048523,GO:0050789,GO:0050794,GO:0050896,GO:0051052,GO:0051053,GO:0051171,GO:0051172,GO:0051716,GO:0060255,GO:0060542,GO:0060543,GO:0065007,GO:…	K03701-ko03420 Nucleotide excision repair	COG0178-Excinuclease ATPase subunit[L]
GE02933	40.22	148.37	-1.88321	1.35e-61	3.21e-60	down	GE02933	hypothetical protein	-	K02067-ko02010 ABC transporters	COG1463-ABC-type transport system involved in resistance to organic solvents, periplasmic component[Q]
GE02046	195.99	413.44	-1.0769	1.96e-61	4.63e-60	down	GE02046	NAD-dependent malic enzyme	-	K00027-ko01200 Carbon metabolism;ko00620 Pyruvate metabolism;ko02020 Two-component system	COG0281-Malic enzyme[C]
GE01270	141.56	479.64	-1.76054	2.75e-61	6.46e-60	down	GE01270	MIP18 family protein YitW	-	-	COG2151-Predicted metal-sulfur cluster biosynthetic enzyme[R]
GE03349	58.14	265.35	-2.19029	4.2e-61	9.81e-60	down	GE03349	Catechol 1,2-dioxygenase (Fragment)	-	K03381-ko01220 Degradation of aromatic compounds;ko00362 Benzoate degradation;ko00364 Fluorobenzoate degradation;ko00361 Chlorocyclohexane and chlorobenzene degradation;ko00623 Toluene degradation	COG3485-Protocatechuate 3,4-dioxygenase beta subunit[Q]
GE02912	44.21	377.91	-3.0956	6.5e-61	1.5e-59	down	GE02912	Protein MbtH	-	K05375-ko00261 Monobactam biosynthesis	COG3251-Uncharacterized protein conserved in bacteria[S]
GE00663	71.36	197.29	-1.46713	1.01e-60	2.33e-59	down	GE00663	putative glutamine synthetase 2	GO:0003674,GO:0003824,GO:0005575,GO:0005886,GO:0016020,GO:0016787,GO:0016810,GO:0016811,GO:0050001,GO:0071944	K01915-ko01230 Biosynthesis of amino acids;ko00630 Glyoxylate and dicarboxylate metabolism;ko00910 Nitrogen metabolism;ko00250 Alanine, aspartate and glutamate metabolism;ko00220 Arginine biosynthesis;ko02020 Two-component system;ko04724 Glutamatergic synapse;ko04727 GABAergic synapse	COG0174-Glutamine synthetase[E]
GE03686	17.63	74.66	-2.0823	1.91e-59	4.35e-58	down	GE03686	Serine/threonine-protein kinase PknB	GO:0000270,GO:0003674,GO:0003824,GO:0004672,GO:0004674,GO:0005488,GO:0005515,GO:0005575,GO:0005618,GO:0006022,GO:0006023,GO:0006024,GO:0006464,GO:0006468,GO:0006793,GO:0006796,GO:0006807,GO:0008047,GO:0008150,GO:0008152,GO:0008360,GO:0009058,GO:0009059,GO:0009252,GO:0009273,GO:0009605,GO:0009607,GO:0009889,GO:0009890,GO:0009892,GO:0009987,GO:0010565,GO:0010698,GO:0016301,GO:0016310,GO:0016740,GO:…	-	COG0515-Serine/threonine protein kinase[RTKL]
GE02259	32.87	179.31	-2.44761	3.7e-59	8.38e-58	down	GE02259	hypothetical protein	-	-	COG5587-Uncharacterized conserved protein[S]
GE03719	24.19	110.26	-2.18843	7.43e-59	1.68e-57	down	GE03719	putative cell wall amidase LytH (Precursor)	GO:0005575,GO:0030288,GO:0030313,GO:0031975,GO:0042597	-	COG0860-N-acetylmuramoyl-L-alanine amidase[M]
GE01027	29.15	136.89	-2.23145	1.17e-58	2.63e-57	down	GE01027	Ornithine carbamoyltransferase	GO:0000050,GO:0003674,GO:0003824,GO:0004585,GO:0005575,GO:0005622,GO:0005737,GO:0006082,GO:0006520,GO:0006525,GO:0006526,GO:0006591,GO:0006807,GO:0008150,GO:0008152,GO:0008652,GO:0009058,GO:0009064,GO:0009084,GO:0009987,GO:0016053,GO:0016740,GO:0016741,GO:0016743,GO:0019627,GO:0019752,GO:0034641,GO:0040007,GO:0042450,GO:0043436,GO:0043603,GO:0043604,GO:0044237,GO:0044238,GO:0044249,GO:0044271,GO:…	K00611-ko01230 Biosynthesis of amino acids;ko00220 Arginine biosynthesis	COG0078-Ornithine carbamoyltransferase[E]
GE01499	13.67	46.64	-1.77055	1.2e-58	2.67e-57	down	GE01499	ATP-dependent RNA helicase HrpA	-	-	COG1643-HrpA-like helicases[L]
GE01733	12.44	108.11	-3.11944	1.2e-58	2.68e-57	down	GE01733	ATP synthase subunit a	-	K02108-ko00190 Oxidative phosphorylation;ko00195 Photosynthesis	COG0356-F0F1-type ATP synthase, subunit a[C]
GE02998	22.28	107.39	-2.26904	2.77e-58	6.13e-57	down	GE02998	3-ketosteroid-9-alpha-monooxygenase oxygenase subunit	-	K15982-ko00984 Steroid degradation	COG4638-Phenylpropionate dioxygenase and related ring-hydroxylating dioxygenases, large terminal subunit[PR]
GE00497	68.5	175.37	-1.35623	2.85e-58	6.28e-57	down	GE00497	Energy-dependent translational throttle protein EttA	GO:0005575,GO:0005618,GO:0005622,GO:0005737,GO:0005829,GO:0005886,GO:0008150,GO:0016020,GO:0030312,GO:0040007,GO:0071944	-	COG0488-ATPase components of ABC transporters with duplicated ATPase domains[R]
GE00290	310.57	734.52	-1.24188	2.96e-58	6.48e-57	down	GE00290	SsrA-binding protein	GO:0005575,GO:0005622,GO:0005737,GO:0005829	-	COG0691-tmRNA-binding protein[O]
GE02567	22.35	202.24	-3.17772	4.32e-58	9.42e-57	down	GE02567	Inner membrane protein YccF	-	-	COG3304-Predicted membrane protein[S]
GE03515	45.34	138.4	-1.60999	4.99e-58	1.08e-56	down	GE03515	Propionyl-CoA carboxylase beta chain	-	-	COG4799-Acetyl-CoA carboxylase, carboxyltransferase component (subunits alpha and beta)[I]
GE01548	24.66	127.85	-2.37421	6.86e-58	1.48e-56	down	GE01548	4-hydroxy-tetrahydrodipicolinate synthase	GO:0003674,GO:0003824,GO:0005575,GO:0005886,GO:0006082,GO:0006520,GO:0006553,GO:0006807,GO:0008150,GO:0008152,GO:0008652,GO:0008840,GO:0009058,GO:0009066,GO:0009067,GO:0009085,GO:0009089,GO:0009987,GO:0016020,GO:0016053,GO:0016829,GO:0016835,GO:0016836,GO:0019752,GO:0040007,GO:0043436,GO:0043648,GO:0044237,GO:0044238,GO:0044249,GO:0044281,GO:0044283,GO:0046394,GO:0046451,GO:0071704,GO:0071944,GO:…	K01714-ko01230 Biosynthesis of amino acids;ko00300 Lysine biosynthesis;ko00261 Monobactam biosynthesis	COG0329-Dihydrodipicolinate synthase/N-acetylneuraminate lyase[EM]
GE00888	267.66	1023.3	-1.93476	1.16e-57	2.49e-56	down	GE00888	hypothetical protein	-	-	-
GE04999	41.14	273.96	-2.73535	1.43e-57	3.06e-56	down	GE04999	hypothetical protein	-	-	-
GE02056	142.93	327.03	-1.19411	1.5e-57	3.2e-56	down	GE02056	Protein mrp-like protein	GO:0008150,GO:0040007	-	COG0489-ATPases involved in chromosome partitioning[D]
GE04169	2.22	56.33	-4.66527	1.78e-57	3.78e-56	down	GE04169	Oligopeptide transport ATP-binding protein OppD	-	K02031-ko02024 Quorum sensing	COG0444-ABC-type dipeptide/oligopeptide/nickel transport system, ATPase component[EP]
GE01179	69.83	182.82	-1.38851	6.05e-57	1.27e-55	down	GE01179	Pup deamidase/depupylase	GO:0000166,GO:0003674,GO:0003824,GO:0005488,GO:0005524,GO:0006464,GO:0006508,GO:0006807,GO:0008144,GO:0008150,GO:0008152,GO:0008233,GO:0009056,GO:0009057,GO:0009987,GO:0010498,GO:0016787,GO:0016810,GO:0016811,GO:0017076,GO:0018193,GO:0018205,GO:0019538,GO:0019941,GO:0030163,GO:0030554,GO:0032446,GO:0032553,GO:0032555,GO:0032559,GO:0035639,GO:0036094,GO:0036211,GO:0043167,GO:0043168,GO:0043170,GO:…	-	-
GE04853	23.37	58.42	-1.3218	2.83e-56	5.9e-55	down	GE04853	Dimodular nonribosomal peptide synthase	-	-	COG1020-Non-ribosomal peptide synthetase modules and related proteins[Q]
GE03941	51.06	132.69	-1.37779	1.58e-55	3.28e-54	down	GE03941	putative oxidoreductase Mb2924c	-	-	COG3383-Uncharacterized anaerobic dehydrogenase[R]
GE01236	28.2	87.69	-1.63672	1.82e-55	3.75e-54	down	GE01236	putative methylmalonyl-CoA mutase large subunit	GO:0005575,GO:0005886,GO:0006082,GO:0006629,GO:0006631,GO:0008150,GO:0008152,GO:0009987,GO:0016020,GO:0016999,GO:0017144,GO:0019541,GO:0019678,GO:0019752,GO:0032787,GO:0043436,GO:0044237,GO:0044238,GO:0044255,GO:0044281,GO:0046459,GO:0071704,GO:0071944	K01847-ko01200 Carbon metabolism;ko00630 Glyoxylate and dicarboxylate metabolism;ko00640 Propanoate metabolism;ko00720 Carbon fixation pathways in prokaryotes;ko00280 Valine, leucine and isoleucine degradation	COG1884-Methylmalonyl-CoA mutase, N-terminal domain/subunit[I]
GE00451	448.77	978.12	-1.12404	1.91e-55	3.92e-54	down	GE00451	Holo-[acyl-carrier-protein] synthase	-	K00997-ko00770 Pantothenate and CoA biosynthesis	COG0736-Phosphopantetheinyl transferase (holo-ACP synthase)[I]
GE01078	39	106.01	-1.44265	2e-55	4.09e-54	down	GE01078	Putative HTH-type transcriptional regulator Mb0914c	-	-	COG3903-Predicted ATPase[R]
GE03583	47.23	144.69	-1.61519	2.09e-55	4.25e-54	down	GE03583	Putative amidase AmiC	-	K01426-ko00330 Arginine and proline metabolism;ko00360 Phenylalanine metabolism;ko00380 Tryptophan metabolism;ko00627 Aminobenzoate degradation;ko00643 Styrene degradation	COG0154-Asp-tRNAAsn/Glu-tRNAGln amidotransferase A subunit and related amidases[J]
GE02225	69.67	283.1	-2.0227	2.23e-55	4.5e-54	down	GE02225	Transcription elongation factor GreA	GO:0005575,GO:0005618,GO:0005622,GO:0005737,GO:0005829,GO:0005886,GO:0008150,GO:0016020,GO:0030312,GO:0042221,GO:0046677,GO:0050896,GO:0071944	-	COG0782-Transcription elongation factor[K]
GE02937	413.96	1188.89	-1.52205	2.72e-55	5.48e-54	down	GE02937	Ferredoxin-2	-	-	-
GE02951	116.5	305.65	-1.39155	3.96e-55	7.94e-54	down	GE02951	putative protein Mb0965c	-	-	COG2141-Coenzyme F420-dependent N5,N10-methylene tetrahydromethanopterin reductase and related flavin-dependent oxidoreductases[C]
GE01507	77.38	193.58	-1.3229	2.57e-54	5.11e-53	down	GE01507	GTPase HflX	GO:0003674,GO:0003824,GO:0005575,GO:0005622,GO:0005737,GO:0016462,GO:0016787,GO:0016817,GO:0016818,GO:0016887,GO:0017111	-	COG2262-GTPases[R]
GE04630	10.26	201.34	-4.29453	3.79e-54	7.49e-53	down	GE04630	putative protein ML2453 (Precursor)	-	-	-
GE04514	14.52	77.53	-2.41671	4.18e-54	8.23e-53	down	GE04514	NADPH-ferredoxin reductase FprA	-	-	COG0493-NADPH-dependent glutamate synthase beta chain and related oxidoreductases[ER]
GE01194	23.55	65.24	-1.47003	6.98e-54	1.36e-52	down	GE01194	Methionine synthase	GO:0000096,GO:0000097,GO:0003674,GO:0003824,GO:0005575,GO:0005618,GO:0005622,GO:0005737,GO:0005829,GO:0005886,GO:0006082,GO:0006520,GO:0006555,GO:0006790,GO:0006807,GO:0008150,GO:0008152,GO:0008168,GO:0008172,GO:0008652,GO:0008705,GO:0009058,GO:0009066,GO:0009067,GO:0009086,GO:0009987,GO:0016020,GO:0016053,GO:0016740,GO:0016741,GO:0019752,GO:0030312,GO:0032259,GO:0042084,GO:0043436,GO:0044237,GO:…	K00548-ko01230 Biosynthesis of amino acids;ko00270 Cysteine and methionine metabolism;ko00450 Selenocompound metabolism;ko00670 One carbon pool by folate	COG1410-Methionine synthase I, cobalamin-binding domain[E]
GE00228	32.28	161.43	-2.3222	2.99e-53	5.79e-52	down	GE00228	hypothetical protein	-	-	-
GE02258	13.84	90.88	-2.71512	4.89e-53	9.38e-52	down	GE02258	Ribose-phosphate pyrophosphokinase	GO:0000287,GO:0003674,GO:0003824,GO:0004749,GO:0005488,GO:0005575,GO:0005618,GO:0005886,GO:0006015,GO:0006793,GO:0006796,GO:0008150,GO:0008152,GO:0009058,GO:0009987,GO:0016020,GO:0016740,GO:0016772,GO:0016778,GO:0019637,GO:0019693,GO:0030145,GO:0030312,GO:0040007,GO:0043167,GO:0043169,GO:0044237,GO:0046390,GO:0046391,GO:0046872,GO:0046914,GO:0071704,GO:0071944,GO:0090407,GO:1901135,GO:1901137,GO:…	K00948-ko01200 Carbon metabolism;ko01230 Biosynthesis of amino acids;ko00030 Pentose phosphate pathway;ko00230 Purine metabolism	COG0462-Phosphoribosylpyrophosphate synthetase[FE]
GE00091	28.84	113.47	-1.97617	9.21e-53	1.76e-51	down	GE00091	Isocitrate dehydrogenase	GO:0000287,GO:0003674,GO:0003824,GO:0004448,GO:0004450,GO:0005488,GO:0005575,GO:0005886,GO:0005975,GO:0006081,GO:0006082,GO:0006091,GO:0006097,GO:0006099,GO:0006101,GO:0006102,GO:0008150,GO:0008152,GO:0008270,GO:0009060,GO:0009987,GO:0015980,GO:0016020,GO:0016491,GO:0016614,GO:0016616,GO:0016999,GO:0017144,GO:0019752,GO:0032787,GO:0043167,GO:0043169,GO:0043436,GO:0044237,GO:0044238,GO:0044262,GO:…	K00031-ko01200 Carbon metabolism;ko01210 2-Oxocarboxylic acid metabolism;ko01230 Biosynthesis of amino acids;ko00020 Citrate cycle (TCA cycle);ko00720 Carbon fixation pathways in prokaryotes;ko00480 Glutathione metabolism;ko04146 Peroxisome	COG0538-Isocitrate dehydrogenases[C]
GE00513	94.07	349.38	-1.89299	5.15e-52	9.77e-51	down	GE00513	Group 2 truncated hemoglobin GlbO	GO:0003674,GO:0005488,GO:0005575,GO:0005886,GO:0006810,GO:0008144,GO:0008150,GO:0015669,GO:0015671,GO:0015893,GO:0016020,GO:0019825,GO:0020037,GO:0036094,GO:0042221,GO:0042493,GO:0046906,GO:0050896,GO:0051179,GO:0051234,GO:0071944,GO:0097159,GO:1901363	-	COG2346-Truncated hemoglobins[R]
GE04410	48.3	117.48	-1.28232	6.04e-52	1.14e-50	down	GE04410	hypothetical protein	-	-	-
GE00895	62.71	199.32	-1.66832	8.56e-52	1.6e-50	down	GE00895	putative oxidoreductase YghA	-	-	COG1028-Dehydrogenases with different specificities (related to short-chain alcohol dehydrogenases)[IQR]
GE04877	34.03	219.21	-2.68743	1.96e-51	3.65e-50	down	GE04877	30S ribosomal protein S8	GO:0003674,GO:0003735,GO:0005198,GO:0005575,GO:0005622,GO:0005737,GO:0005829,GO:0005840,GO:0008150,GO:0015935,GO:0022626,GO:0022627,GO:0032991,GO:0040007,GO:0043226,GO:0043228,GO:0043229,GO:0043232,GO:0044391,GO:1990904	K02994-ko03010 Ribosome	COG0096-Ribosomal protein S8[J]
GE04251	145.19	330.83	-1.18815	5.44e-51	1.01e-49	down	GE04251	putative thc operon regulatory protein	-	-	COG2207-AraC-type DNA-binding domain-containing proteins[K]
GE03935	70.6	236.03	-1.74123	5.62e-51	1.04e-49	down	GE03935	Molecular chaperone Hsp31 and glyoxalase 3	-	-	COG0693-Putative intracellular protease/amidase[R]
GE03285	2.02	28.36	-3.81143	7.28e-51	1.34e-49	down	GE03285	NADH oxidase	-	-	COG1902-NADH:flavin oxidoreductases, Old Yellow Enzyme family[C]
GE01693	162.97	500.25	-1.61804	9.17e-51	1.68e-49	down	GE01693	Putative lipoprotein LprD (Precursor)	-	-	COG4578-Glucitol operon activator[K]
GE03391	14.96	57.66	-1.94646	2.84e-50	5.16e-49	down	GE03391	Nitric oxide reductase subunit B	-	K04561-ko00910 Nitrogen metabolism	COG3256-Nitric oxide reductase large subunit[P]
GE04338	34.21	113.05	-1.72447	2.97e-50	5.38e-49	down	GE04338	Geranial dehydrogenase	-	-	COG1012-NAD-dependent aldehyde dehydrogenases[C]
GE04399	16.21	81.3	-2.32637	5.6e-50	1.01e-48	down	GE04399	putative aspartate aminotransferase	GO:0005575,GO:0005886,GO:0008150,GO:0016020,GO:0040007,GO:0071944	K14260-ko01210 2-Oxocarboxylic acid metabolism;ko01230 Biosynthesis of amino acids;ko00250 Alanine, aspartate and glutamate metabolism;ko00290 Valine, leucine and isoleucine biosynthesis;ko00220 Arginine biosynthesis	COG0436-Aspartate/tyrosine/aromatic aminotransferase[E]
GE00193	48.96	139.18	-1.50728	6.04e-50	1.08e-48	down	GE00193	Adenosylhomocysteinase	GO:0000096,GO:0000098,GO:0000166,GO:0003674,GO:0003824,GO:0004013,GO:0005488,GO:0005515,GO:0005575,GO:0005576,GO:0005618,GO:0005622,GO:0005737,GO:0005829,GO:0005886,GO:0006082,GO:0006139,GO:0006520,GO:0006534,GO:0006555,GO:0006575,GO:0006725,GO:0006790,GO:0006807,GO:0008150,GO:0008152,GO:0009056,GO:0009063,GO:0009066,GO:0009068,GO:0009069,GO:0009087,GO:0009116,GO:0009119,GO:0009987,GO:0016020,GO:…	K01251-ko00270 Cysteine and methionine metabolism	COG0499-S-adenosylhomocysteine hydrolase[H]
GE04171	3.18	42.22	-3.73083	7.15e-50	1.27e-48	down	GE04171	6-aminohexanoate-cyclic-dimer hydrolase	-	K01426-ko00330 Arginine and proline metabolism;ko00360 Phenylalanine metabolism;ko00380 Tryptophan metabolism;ko00627 Aminobenzoate degradation;ko00643 Styrene degradation	COG0154-Asp-tRNAAsn/Glu-tRNAGln amidotransferase A subunit and related amidases[J]
GE00514	52.1	200.62	-1.94511	7.21e-50	1.28e-48	down	GE00514	hypothetical protein	-	-	COG1403-Restriction endonuclease[V]
GE02264	35.67	120.9	-1.76103	1.09e-49	1.94e-48	down	GE02264	Iron(II)-dependent oxidoreductase EgtB	GO:0000096,GO:0000097,GO:0003674,GO:0003824,GO:0005488,GO:0005506,GO:0006082,GO:0006520,GO:0006547,GO:0006548,GO:0006575,GO:0006577,GO:0006578,GO:0006725,GO:0006790,GO:0006807,GO:0008150,GO:0008152,GO:0008198,GO:0008652,GO:0009056,GO:0009058,GO:0009063,GO:0009987,GO:0016053,GO:0016054,GO:0016491,GO:0019439,GO:0019752,GO:0034641,GO:0042398,GO:0043167,GO:0043169,GO:0043436,GO:0044237,GO:0044238,GO:…	K18912-ko00340 Histidine metabolism	COG1262-Uncharacterized conserved protein[S]
GE00697	128.43	308.46	-1.2641	2.38e-49	4.19e-48	down	GE00697	putative cytochrome c oxidase subunit 2	GO:0005575,GO:0005576,GO:0005886,GO:0005887,GO:0006091,GO:0006119,GO:0006139,GO:0006163,GO:0006725,GO:0006753,GO:0006793,GO:0006796,GO:0006807,GO:0008150,GO:0008152,GO:0009117,GO:0009123,GO:0009126,GO:0009141,GO:0009144,GO:0009150,GO:0009161,GO:0009167,GO:0009199,GO:0009205,GO:0009259,GO:0009319,GO:0009987,GO:0015980,GO:0016020,GO:0016021,GO:0016310,GO:0017144,GO:0019637,GO:0019693,GO:0022900,GO:…	K02275-ko00190 Oxidative phosphorylation	COG1622-Heme/copper-type cytochrome/quinol oxidases, subunit 2[C]
GE01125	70.76	201.71	-1.51128	3.76e-49	6.58e-48	down	GE01125	hypothetical protein	-	-	-
GE00811	19.41	71.53	-1.88175	5.6e-49	9.77e-48	down	GE00811	Succinate dehydrogenase flavoprotein subunit	GO:0000104,GO:0000166,GO:0001539,GO:0003674,GO:0003824,GO:0005488,GO:0005575,GO:0005622,GO:0005737,GO:0005829,GO:0005886,GO:0006091,GO:0006113,GO:0006928,GO:0006950,GO:0006974,GO:0006996,GO:0008150,GO:0008152,GO:0009055,GO:0009061,GO:0009987,GO:0015980,GO:0016020,GO:0016043,GO:0016491,GO:0016627,GO:0022607,GO:0022900,GO:0030030,GO:0030031,GO:0032991,GO:0033554,GO:0036094,GO:0040011,GO:0043167,GO:…	K00239-ko01200 Carbon metabolism;ko00020 Citrate cycle (TCA cycle);ko00650 Butanoate metabolism;ko00190 Oxidative phosphorylation;ko00720 Carbon fixation pathways in prokaryotes;ko05134 Legionellosis	COG1053-Succinate dehydrogenase/fumarate reductase, flavoprotein subunit[C]
GE00701	48.91	152.36	-1.63928	8.35e-49	1.44e-47	down	GE00701	putative menaquinol-cytochrome c reductase iron-sulfur subunit	GO:0005575,GO:0005618,GO:0005886,GO:0005887,GO:0008150,GO:0016020,GO:0016021,GO:0030312,GO:0031224,GO:0031226,GO:0040007,GO:0071944	K03890-ko00190 Oxidative phosphorylation	COG0723-Rieske Fe-S protein[C]
GE04854	27.51	60.78	-1.14364	1.01e-48	1.73e-47	down	GE04854	Dimodular nonribosomal peptide synthase	-	-	COG1020-Non-ribosomal peptide synthetase modules and related proteins[Q]
GE00085	232.36	523.69	-1.17235	2.57e-48	4.4e-47	down	GE00085	putative protein slr1152	-	-	COG1357-Uncharacterized low-complexity proteins[S]
GE02057	47.9	242.21	-2.33816	3.73e-48	6.35e-47	down	GE02057	Sec-independent protein translocase protein TatB	-	K03117-ko03060 Protein export;ko03070 Bacterial secretion system	-
GE01030	22.84	89.01	-1.9624	4.43e-48	7.49e-47	down	GE01030	Argininosuccinate lyase	GO:0003674,GO:0003824,GO:0004056,GO:0005575,GO:0005618,GO:0005622,GO:0005737,GO:0006082,GO:0006520,GO:0006525,GO:0006526,GO:0006591,GO:0006807,GO:0008150,GO:0008152,GO:0008652,GO:0009058,GO:0009064,GO:0009084,GO:0009987,GO:0016053,GO:0016829,GO:0016840,GO:0016842,GO:0019752,GO:0030312,GO:0040007,GO:0042450,GO:0043436,GO:0044237,GO:0044238,GO:0044249,GO:0044281,GO:0044283,GO:0046394,GO:0071704,GO:…	K01755-ko01230 Biosynthesis of amino acids;ko00250 Alanine, aspartate and glutamate metabolism;ko00220 Arginine biosynthesis	COG0165-Argininosuccinate lyase[E]
GE01834	8.57	35.25	-2.04026	6.98e-48	1.18e-46	down	GE01834	hypothetical protein	-	-	COG1483-Predicted ATPase (AAA+ superfamily)[R]
GE00271	15.08	66.87	-2.14872	7.78e-48	1.3e-46	down	GE00271	2-succinylbenzoate--CoA ligase	-	-	COG0318-Acyl-CoA synthetases (AMP-forming)/AMP-acid ligases II[IQ]
GE03809	30.16	274.43	-3.18573	9.43e-48	1.58e-46	down	GE03809	30S ribosomal protein S18 1	GO:0003674,GO:0003735,GO:0005198,GO:0005575,GO:0005622,GO:0005737,GO:0005829,GO:0005840,GO:0006412,GO:0006518,GO:0006807,GO:0008150,GO:0008152,GO:0009058,GO:0009059,GO:0009987,GO:0010467,GO:0015935,GO:0019538,GO:0022626,GO:0022627,GO:0032991,GO:0034641,GO:0034645,GO:0043043,GO:0043170,GO:0043226,GO:0043228,GO:0043229,GO:0043232,GO:0043603,GO:0043604,GO:0044237,GO:0044238,GO:0044249,GO:0044260,GO:…	K02963-ko03010 Ribosome	COG0238-Ribosomal protein S18[J]
GE01482	34.34	132.96	-1.95303	9.94e-48	1.66e-46	down	GE01482	hypothetical protein	-	-	-
GE01414	19.64	69	-1.8128	2.72e-47	4.48e-46	down	GE01414	Threonine--tRNA ligase	GO:0003674,GO:0003824,GO:0004812,GO:0004829,GO:0005575,GO:0005622,GO:0005737,GO:0005886,GO:0006082,GO:0006139,GO:0006399,GO:0006412,GO:0006418,GO:0006435,GO:0006518,GO:0006520,GO:0006725,GO:0006807,GO:0008150,GO:0008152,GO:0009058,GO:0009059,GO:0009987,GO:0010467,GO:0016020,GO:0016070,GO:0016874,GO:0016875,GO:0019538,GO:0019752,GO:0034641,GO:0034645,GO:0034660,GO:0040007,GO:0043038,GO:0043039,GO:…	K01868-ko00970 Aminoacyl-tRNA biosynthesis	COG0441-Threonyl-tRNA synthetase[J]
GE00661	21.81	112.46	-2.36635	3.47e-47	5.67e-46	down	GE00661	3-methyl-2-oxobutanoate hydroxymethyltransferase	GO:0000287,GO:0003674,GO:0003824,GO:0003864,GO:0005488,GO:0005575,GO:0005886,GO:0006082,GO:0006575,GO:0006766,GO:0006767,GO:0006807,GO:0008150,GO:0008152,GO:0009058,GO:0009110,GO:0009987,GO:0015939,GO:0015940,GO:0016020,GO:0016053,GO:0016740,GO:0016741,GO:0016742,GO:0019752,GO:0032787,GO:0034641,GO:0040007,GO:0042364,GO:0042398,GO:0043167,GO:0043169,GO:0043436,GO:0043603,GO:0043604,GO:0044237,GO:…	K00606-ko00770 Pantothenate and CoA biosynthesis	COG0413-Ketopantoate hydroxymethyltransferase[H]
GE01405	41.23	140.77	-1.77157	7.16e-47	1.17e-45	down	GE01405	Diacylglycerol acyltransferase/mycolyltransferase Ag85C (Precursor)	-	K18851-ko00561 Glycerolipid metabolism	COG0627-Predicted esterase[R]
GE01008	125.55	297.33	-1.2438	4.86e-46	7.89e-45	down	GE01008	hypothetical protein	-	-	-
GE04865	7.75	161.07	-4.37735	6.82e-46	1.1e-44	down	GE04865	50S ribosomal protein L23	GO:0000027,GO:0003674,GO:0003676,GO:0003723,GO:0003735,GO:0005198,GO:0005488,GO:0005575,GO:0005622,GO:0005737,GO:0005829,GO:0005840,GO:0005886,GO:0006412,GO:0006518,GO:0006807,GO:0006996,GO:0008150,GO:0008152,GO:0009058,GO:0009059,GO:0009987,GO:0010467,GO:0015934,GO:0016020,GO:0016043,GO:0019538,GO:0022607,GO:0022613,GO:0022618,GO:0022625,GO:0022626,GO:0032991,GO:0034622,GO:0034641,GO:0034645,GO:…	K02892-ko03010 Ribosome	COG0089-Ribosomal protein L23[J]
GE03162	83.41	260.86	-1.64498	1.38e-45	2.23e-44	down	GE03162	Putative mycofactocin biosynthesis transcriptional regulator MftR	-	-	COG1309-Transcriptional regulator[K]
GE04167	6.55	64.08	-3.29031	2.55e-45	4.09e-44	down	GE04167	Oligopeptide transport system permease protein AppB	-	K02033-ko02024 Quorum sensing	COG0601-ABC-type dipeptide/oligopeptide/nickel transport systems, permease components[EP]
GE02427	9.71	48	-2.30549	3.16e-45	5.06e-44	down	GE02427	Chaperone protein HtpG	GO:0000302,GO:0000303,GO:0000305,GO:0005575,GO:0005576,GO:0005618,GO:0005886,GO:0006950,GO:0006979,GO:0008150,GO:0009987,GO:0010035,GO:0016020,GO:0030312,GO:0033554,GO:0034599,GO:0034614,GO:0042221,GO:0050896,GO:0051716,GO:0070887,GO:0071450,GO:0071451,GO:0071944,GO:1901700,GO:1901701	K04079-ko04141 Protein processing in endoplasmic reticulum;ko04151 PI3K-Akt signaling pathway;ko04621 NOD-like receptor signaling pathway;ko04612 Antigen processing and presentation;ko04915 Estrogen signaling pathway;ko04914 Progesterone-mediated oocyte maturation;ko04626 Plant-pathogen interaction;ko05200 Pathways in cancer;ko05215 Prostate cancer	COG0326-Molecular chaperone, HSP90 family[O]
GE01091	116.57	358.95	-1.62259	3.88e-45	6.17e-44	down	GE01091	Transcriptional regulator BlaI	GO:0003674,GO:0003676,GO:0003677,GO:0005488,GO:0006355,GO:0008150,GO:0009889,GO:0010468,GO:0010556,GO:0019219,GO:0019222,GO:0031323,GO:0031326,GO:0042221,GO:0046677,GO:0050789,GO:0050794,GO:0050896,GO:0051171,GO:0051252,GO:0060255,GO:0065007,GO:0080090,GO:0097159,GO:1901363,GO:1903506,GO:2000112,GO:2001141	-	COG3682-Predicted transcriptional regulator[K]
GE00925	17.46	70.15	-2.00639	6.15e-45	9.74e-44	down	GE00925	Nodulation protein NolNO	-	-	COG2192-Predicted carbamoyl transferase, NodU family[O]
GE00645	155.07	336.9	-1.1194	1.54e-44	2.41e-43	down	GE00645	putative SURF1-like protein Mb2259	GO:0005575,GO:0005618,GO:0008150,GO:0030312,GO:0040007,GO:0044110,GO:0044117,GO:0044119,GO:0044403,GO:0044419,GO:0051704,GO:0071944	-	COG3346-Uncharacterized conserved protein[S]
GE04485	19.34	106.87	-2.4662	3.83e-44	5.94e-43	down	GE04485	Putative zinc metalloprotease Rip2	-	-	-
GE00298	82.63	183.5	-1.15104	1.35e-43	2.07e-42	down	GE00298	Phosphoglucomutase	-	K01835-ko00010 Glycolysis / Gluconeogenesis;ko00030 Pentose phosphate pathway;ko00052 Galactose metabolism;ko00500 Starch and sucrose metabolism;ko00520 Amino sugar and nucleotide sugar metabolism;ko00230 Purine metabolism;ko00521 Streptomycin biosynthesis	COG0033-Phosphoglucomutase[G]
GE04763	44.59	213.28	-2.25796	1.56e-43	2.39e-42	down	GE04763	50S ribosomal protein L11	GO:0000027,GO:0003674,GO:0003676,GO:0003723,GO:0003735,GO:0005198,GO:0005488,GO:0005575,GO:0005618,GO:0005622,GO:0005737,GO:0005829,GO:0005840,GO:0006412,GO:0006518,GO:0006807,GO:0006996,GO:0008150,GO:0008152,GO:0009058,GO:0009059,GO:0009987,GO:0010467,GO:0015934,GO:0016043,GO:0019538,GO:0019843,GO:0022607,GO:0022613,GO:0022618,GO:0022625,GO:0022626,GO:0030312,GO:0032991,GO:0034622,GO:0034641,GO:…	K02867-ko03010 Ribosome	COG0080-Ribosomal protein L11[J]
GE00133	15.35	72.98	-2.24926	1.58e-43	2.41e-42	down	GE00133	putative protein Mb3320	-	-	COG5383-Uncharacterized protein conserved in bacteria[S]
GE01065	387.09	782.92	-1.0162	3.14e-43	4.77e-42	down	GE01065	Glycogen accumulation regulator GarA	GO:0003674,GO:0005488,GO:0005515,GO:0005575,GO:0005576,GO:0005618,GO:0005886,GO:0006109,GO:0006110,GO:0006140,GO:0006464,GO:0006468,GO:0006793,GO:0006796,GO:0006807,GO:0008150,GO:0008152,GO:0009889,GO:0009890,GO:0009892,GO:0009894,GO:0009895,GO:0009987,GO:0010563,GO:0010675,GO:0010677,GO:0016020,GO:0016310,GO:0019219,GO:0019220,GO:0019222,GO:0019538,GO:0030312,GO:0030808,GO:0030809,GO:0030811,GO:…	-	COG1716-FOG: FHA domain[T]
GE02005	90.29	190.67	-1.07844	3.35e-43	5.08e-42	down	GE02005	Long-chain-fatty-acid--CoA ligase FadD15	GO:0001676,GO:0003674,GO:0003824,GO:0004467,GO:0005575,GO:0005618,GO:0005886,GO:0006082,GO:0006629,GO:0006631,GO:0008150,GO:0008152,GO:0008610,GO:0009058,GO:0009273,GO:0009987,GO:0015645,GO:0016020,GO:0016405,GO:0016874,GO:0016877,GO:0016878,GO:0019752,GO:0030312,GO:0032787,GO:0042546,GO:0043436,GO:0044085,GO:0044237,GO:0044238,GO:0044255,GO:0044281,GO:0071554,GO:0071704,GO:0071766,GO:0071840,GO:…	K01897-ko01212 Fatty acid metabolism;ko00061 Fatty acid biosynthesis;ko00071 Fatty acid degradation;ko04146 Peroxisome;ko02024 Quorum sensing;ko04920 Adipocytokine signaling pathway;ko03320 PPAR signaling pathway	COG1022-Long-chain acyl-CoA synthetases (AMP-forming)[I]
GE02436	1.24	35.91	-4.85597	5.38e-43	8.1e-42	down	GE02436	Flavohemoprotein	-	-	COG1017-Hemoglobin-like flavoprotein[C]
GE00812	31.36	134.23	-2.09771	8.65e-43	1.3e-41	down	GE00812	Fumarate reductase iron-sulfur subunit	-	K00240-ko01200 Carbon metabolism;ko00020 Citrate cycle (TCA cycle);ko00650 Butanoate metabolism;ko00190 Oxidative phosphorylation;ko00720 Carbon fixation pathways in prokaryotes	COG0479-Succinate dehydrogenase/fumarate reductase, Fe-S protein subunit[C]
GE02062	76.71	189.74	-1.30654	1.83e-42	2.72e-41	down	GE02062	Glucose-1-phosphate adenylyltransferase	GO:0000271,GO:0005575,GO:0005622,GO:0005737,GO:0005829,GO:0005975,GO:0005976,GO:0006073,GO:0008150,GO:0008152,GO:0009058,GO:0009059,GO:0009250,GO:0009987,GO:0016051,GO:0033692,GO:0034637,GO:0034645,GO:0043170,GO:0044042,GO:0044237,GO:0044238,GO:0044249,GO:0044260,GO:0044262,GO:0044264,GO:0071704,GO:1901576	K00975-ko00500 Starch and sucrose metabolism;ko00520 Amino sugar and nucleotide sugar metabolism	COG0448-ADP-glucose pyrophosphorylase[G]
GE03762	67.89	298.51	-2.13651	2.56e-42	3.79e-41	down	GE03762	hypothetical protein	-	-	-
GE03752	60.13	124.24	-1.04697	3.39e-42	5.01e-41	down	GE03752	Leucine--tRNA ligase	GO:0003674,GO:0003824,GO:0004812,GO:0004823,GO:0005575,GO:0005618,GO:0005622,GO:0005737,GO:0005829,GO:0005886,GO:0006082,GO:0006139,GO:0006399,GO:0006412,GO:0006418,GO:0006429,GO:0006518,GO:0006520,GO:0006725,GO:0006807,GO:0008150,GO:0008152,GO:0009058,GO:0009059,GO:0009987,GO:0010467,GO:0016020,GO:0016070,GO:0016874,GO:0016875,GO:0019538,GO:0019752,GO:0030312,GO:0034641,GO:0034645,GO:0034660,GO:…	K01869-ko00970 Aminoacyl-tRNA biosynthesis	COG0495-Leucyl-tRNA synthetase[J]
GE04097	9.06	48.61	-2.42367	5.76e-42	8.49e-41	down	GE04097	Long-chain-fatty-acid--CoA ligase FadD17	-	-	COG0318-Acyl-CoA synthetases (AMP-forming)/AMP-acid ligases II[IQ]
GE01425	81.13	283.8	-1.80657	8.72e-42	1.28e-40	down	GE01425	Peptide methionine sulfoxide reductase MsrB	-	-	COG0229-Conserved domain frequently associated with peptide methionine sulfoxide reductase[O]
GE04887	320.79	815.67	-1.34636	1.04e-41	1.51e-40	down	GE04887	Translation initiation factor IF-1	GO:0003674,GO:0005488,GO:0005575,GO:0005618,GO:0005622,GO:0005737,GO:0005829,GO:0005886,GO:0008150,GO:0016020,GO:0030312,GO:0040007,GO:0043021,GO:0043022,GO:0044877,GO:0071944	-	COG0361-Translation initiation factor 1 (IF-1)[J]
GE04301	195.23	576.89	-1.56312	1.54e-41	2.24e-40	down	GE04301	hypothetical protein	-	-	-
GE00339	149.26	429.53	-1.52493	1.69e-41	2.45e-40	down	GE00339	hypothetical protein	-	-	COG3324-Predicted enzyme related to lactoylglutathione lyase[R]
GE02822	109.19	226.49	-1.05261	1.87e-41	2.71e-40	down	GE02822	Cytochrome bd ubiquinol oxidase subunit 1	-	K00425-ko00190 Oxidative phosphorylation;ko02020 Two-component system	COG1271-Cytochrome bd-type quinol oxidase, subunit 1[C]
GE04730	34.74	242.5	-2.80332	2.42e-41	3.49e-40	down	GE04730	hypothetical protein	-	-	-
GE02585	17.16	113.4	-2.7243	2.95e-41	4.24e-40	down	GE02585	putative protein YnjA	-	-	COG2128-Uncharacterized conserved protein[S]
GE00571	31.01	88.71	-1.51636	7.08e-41	1.01e-39	down	GE00571	Elongation factor 4	GO:0005575,GO:0005618,GO:0005622,GO:0005737,GO:0005829,GO:0030312,GO:0071944	-	COG0481-Membrane GTPase LepA[M]
GE00032	150.38	333.99	-1.15119	1.1e-40	1.57e-39	down	GE00032	Cis-2,3-dihydrobiphenyl-2,3-diol dehydrogenase	-	K05711-ko01220 Degradation of aromatic compounds;ko00360 Phenylalanine metabolism	COG1028-Dehydrogenases with different specificities (related to short-chain alcohol dehydrogenases)[IQR]
GE00755	44.47	149.53	-1.74953	1.12e-40	1.59e-39	down	GE00755	Cell wall synthesis protein Wag31	GO:0005575,GO:0005618,GO:0005886,GO:0008150,GO:0008360,GO:0009273,GO:0009987,GO:0016020,GO:0022603,GO:0022604,GO:0030312,GO:0031647,GO:0040007,GO:0042546,GO:0044085,GO:0050789,GO:0050793,GO:0050794,GO:0050821,GO:0051128,GO:0060187,GO:0065007,GO:0065008,GO:0071554,GO:0071840,GO:0071944	-	COG3599-Cell division initiation protein[D]
GE00396	43.76	158.75	-1.85907	1.53e-40	2.16e-39	down	GE00396	DNA-binding protein HU-like protein	GO:0000976,GO:0001067,GO:0001216,GO:0003674,GO:0003676,GO:0003677,GO:0003684,GO:0003690,GO:0003700,GO:0005488,GO:0005575,GO:0005618,GO:0005622,GO:0005737,GO:0005829,GO:0005886,GO:0006139,GO:0006259,GO:0006355,GO:0006725,GO:0006807,GO:0006873,GO:0006875,GO:0006879,GO:0006950,GO:0007154,GO:0008150,GO:0008152,GO:0009267,GO:0009605,GO:0009889,GO:0009891,GO:0009893,GO:0009987,GO:0009991,GO:0010106,GO:…	-	COG0776-Bacterial nucleoid DNA-binding protein[L]
GE01017	38.13	201.34	-2.40064	2.9e-40	4.09e-39	down	GE01017	50S ribosomal protein L20	GO:0000027,GO:0003674,GO:0003735,GO:0005198,GO:0005575,GO:0005622,GO:0005737,GO:0005829,GO:0005840,GO:0005886,GO:0006996,GO:0008150,GO:0009987,GO:0015934,GO:0016020,GO:0016043,GO:0022607,GO:0022613,GO:0022618,GO:0022625,GO:0022626,GO:0032991,GO:0034622,GO:0042254,GO:0042255,GO:0042273,GO:0043226,GO:0043228,GO:0043229,GO:0043232,GO:0043933,GO:0044085,GO:0044391,GO:0065003,GO:0070925,GO:0071826,GO:…	K02887-ko03010 Ribosome	COG0292-Ribosomal protein L20[J]
GE02266	27.79	99.18	-1.83548	3.79e-40	5.32e-39	down	GE02266	putative cysteine desulfurase	-	-	COG0520-Selenocysteine lyase[E]
GE01285	55.6	125.45	-1.17396	4.14e-40	5.8e-39	down	GE01285	Transketolase	GO:0005575,GO:0005576,GO:0005618,GO:0005622,GO:0005737,GO:0005829,GO:0005886,GO:0008150,GO:0016020,GO:0030312,GO:0040007,GO:0071944	K00615-ko01200 Carbon metabolism;ko01230 Biosynthesis of amino acids;ko00030 Pentose phosphate pathway;ko00710 Carbon fixation in photosynthetic organisms;ko01051 Biosynthesis of ansamycins	COG0021-Transketolase[G]
GE00544	44.9	268.15	-2.57825	6.49e-40	9.04e-39	down	GE00544	50S ribosomal protein L27	GO:0003674,GO:0003735,GO:0005198,GO:0005575,GO:0005618,GO:0005622,GO:0005737,GO:0005829,GO:0005840,GO:0005886,GO:0008150,GO:0015934,GO:0016020,GO:0022625,GO:0022626,GO:0030312,GO:0032991,GO:0040007,GO:0043226,GO:0043228,GO:0043229,GO:0043232,GO:0044391,GO:0071944,GO:1990904	K02899-ko03010 Ribosome	COG0211-Ribosomal protein L27[J]
GE00980	34.06	105.69	-1.63369	7.73e-40	1.07e-38	down	GE00980	Pyruvate kinase	GO:0003674,GO:0003824,GO:0004743,GO:0005575,GO:0005622,GO:0005737,GO:0005829,GO:0005886,GO:0005975,GO:0006082,GO:0006090,GO:0006091,GO:0006096,GO:0006139,GO:0006163,GO:0006164,GO:0006165,GO:0006725,GO:0006753,GO:0006754,GO:0006757,GO:0006793,GO:0006796,GO:0006807,GO:0008150,GO:0008152,GO:0009056,GO:0009058,GO:0009117,GO:0009123,GO:0009124,GO:0009126,GO:0009127,GO:0009132,GO:0009135,GO:0009141,GO:…	K00873-ko01200 Carbon metabolism;ko01230 Biosynthesis of amino acids;ko00010 Glycolysis / Gluconeogenesis;ko00620 Pyruvate metabolism;ko00230 Purine metabolism;ko04922 Glucagon signaling pathway;ko05230 Central carbon metabolism in cancer;ko05203 Viral carcinogenesis;ko04930 Type II diabetes mellitus	COG0469-Pyruvate kinase[G]
GE04581	52.53	175.96	-1.74403	1.14e-39	1.58e-38	down	GE04581	Phosphatidylserine decarboxylase beta chain	GO:0005575,GO:0005886,GO:0016020,GO:0071944	K01613-ko00564 Glycerophospholipid metabolism	COG0688-Phosphatidylserine decarboxylase[I]
GE00411	10.03	42.09	-2.06916	2.32e-39	3.19e-38	down	GE00411	ATP-dependent DNA helicase RecG	GO:0003674,GO:0003724,GO:0003824,GO:0004386,GO:0005575,GO:0005622,GO:0005737,GO:0005886,GO:0006139,GO:0006725,GO:0006807,GO:0008150,GO:0008152,GO:0008186,GO:0009987,GO:0010501,GO:0016020,GO:0016070,GO:0016462,GO:0016787,GO:0016817,GO:0016818,GO:0016887,GO:0017111,GO:0034641,GO:0043170,GO:0044237,GO:0044238,GO:0046483,GO:0071704,GO:0071944,GO:0090304,GO:0140098,GO:1901360	K03655-ko03440 Homologous recombination	COG1200-RecG-like helicase[LK]
GE02949	41.49	129.54	-1.64256	2.37e-39	3.25e-38	down	GE02949	hypothetical protein	-	-	COG0183-Acetyl-CoA acetyltransferase[I]
GE00538	60.42	124.57	-1.04386	2.42e-39	3.31e-38	down	GE00538	Valine--tRNA ligase	GO:0003674,GO:0003824,GO:0004812,GO:0004832,GO:0005575,GO:0005618,GO:0005622,GO:0005737,GO:0005829,GO:0005886,GO:0006082,GO:0006139,GO:0006399,GO:0006412,GO:0006418,GO:0006438,GO:0006518,GO:0006520,GO:0006725,GO:0006807,GO:0008150,GO:0008152,GO:0009058,GO:0009059,GO:0009987,GO:0010467,GO:0016020,GO:0016070,GO:0016874,GO:0016875,GO:0019538,GO:0019752,GO:0030312,GO:0034641,GO:0034645,GO:0034660,GO:…	K01873-ko00970 Aminoacyl-tRNA biosynthesis	COG0525-Valyl-tRNA synthetase[J]
GE03747	14.12	62.98	-2.15715	5.07e-39	6.89e-38	down	GE03747	Glutamate decarboxylase alpha	-	K01580-ko00650 Butanoate metabolism;ko00250 Alanine, aspartate and glutamate metabolism;ko00410 beta-Alanine metabolism;ko00430 Taurine and hypotaurine metabolism;ko02024 Quorum sensing;ko04727 GABAergic synapse;ko04940 Type I diabetes mellitus	COG0076-Glutamate decarboxylase and related PLP-dependent proteins[E]
GE04570	12.38	55.2	-2.15666	5.07e-39	6.89e-38	down	GE04570	Na(+)/H(+) antiporter subunit D	-	-	COG0651-Formate hydrogenlyase subunit 3/Multisubunit Na+/H+ antiporter, MnhD subunit[CP]
GE00568	58.63	299.01	-2.35048	6.2e-39	8.38e-38	down	GE00568	30S ribosomal protein S20	GO:0005575,GO:0005622,GO:0005737,GO:0005829,GO:0008150,GO:0040007	K02968-ko03010 Ribosome	COG0268-Ribosomal protein S20[J]
GE01327	116.66	247.39	-1.08448	1.23e-38	1.65e-37	down	GE01327	S-adenosylmethionine synthase	GO:0003674,GO:0003824,GO:0004478,GO:0005488,GO:0005515,GO:0005575,GO:0005618,GO:0005622,GO:0005737,GO:0005829,GO:0005886,GO:0008150,GO:0016020,GO:0016740,GO:0016765,GO:0019899,GO:0030312,GO:0035375,GO:0040007,GO:0071944	K00789-ko01230 Biosynthesis of amino acids;ko00270 Cysteine and methionine metabolism	COG0192-S-adenosylmethionine synthetase[H]
GE00914	45.38	252.63	-2.4769	1.38e-38	1.84e-37	down	GE00914	hypothetical protein	-	-	-
GE00409	17.24	170.74	-3.30797	1.86e-38	2.48e-37	down	GE00409	50S ribosomal protein L28 1	GO:0003674,GO:0003735,GO:0005198	K02902-ko03010 Ribosome	COG0227-Ribosomal protein L28[J]
GE00896	5.24	77.18	-3.88059	1.95e-38	2.59e-37	down	GE00896	hypothetical protein	-	-	-
GE03858	40.37	226.27	-2.48669	2.1e-38	2.78e-37	down	GE03858	hypothetical protein	-	-	-
GE04404	19.95	53.79	-1.43095	2.2e-38	2.91e-37	down	GE04404	putative protein FadF	-	-	COG0247-Fe-S oxidoreductase[C]
GE03200	91.32	249.13	-1.4479	2.44e-38	3.2e-37	down	GE03200	cAMP receptor protein	GO:0000166,GO:0000976,GO:0001067,GO:0001216,GO:0001217,GO:0003674,GO:0003676,GO:0003677,GO:0003690,GO:0003700,GO:0005488,GO:0005575,GO:0005618,GO:0005886,GO:0006109,GO:0006355,GO:0008150,GO:0009889,GO:0009890,GO:0009891,GO:0009892,GO:0009893,GO:0010468,GO:0010556,GO:0010557,GO:0010558,GO:0010565,GO:0010604,GO:0010605,GO:0010628,GO:0010629,GO:0010675,GO:0016020,GO:0017076,GO:0019219,GO:0019222,GO:…	K10914-ko02020 Two-component system;ko02024 Quorum sensing;ko05111 Vibrio cholerae pathogenic cycle	COG0664-cAMP-binding proteins - catabolite gene activator and regulatory subunit of cAMP-dependent protein kinases[T]
GE02907	10.79	87.72	-3.02321	2.66e-38	3.49e-37	down	GE02907	Ubiquinone biosynthesis O-methyltransferase	-	-	COG2227-2-polyprenyl-3-methyl-5-hydroxy-6-metoxy-1,4-benzoquinol methylase[H]
GE02934	7.33	63.24	-3.10895	5.88e-38	7.67e-37	down	GE02934	putative ABC transporter permease protein RBE_1340	-	K02066-ko02010 ABC transporters	COG0767-ABC-type transport system involved in resistance to organic solvents, permease component[Q]
GE03053	44.99	165.21	-1.87662	7.65e-38	9.95e-37	down	GE03053	Carbonic anhydrase	GO:0003674,GO:0003824,GO:0004089,GO:0005488,GO:0008270,GO:0016829,GO:0016835,GO:0016836,GO:0043167,GO:0043169,GO:0046872,GO:0046914	K01673-ko00910 Nitrogen metabolism	COG0288-Carbonic anhydrase[P]
GE04475	96.35	223.69	-1.21514	7.76e-38	1.01e-36	down	GE04475	Fructose-bisphosphate aldolase	GO:0003674,GO:0003824,GO:0004332,GO:0005488,GO:0005515,GO:0005575,GO:0005576,GO:0005618,GO:0005622,GO:0005737,GO:0005829,GO:0005886,GO:0005975,GO:0005996,GO:0006006,GO:0006082,GO:0006090,GO:0006091,GO:0006094,GO:0006096,GO:0006139,GO:0006163,GO:0006164,GO:0006165,GO:0006725,GO:0006753,GO:0006754,GO:0006757,GO:0006793,GO:0006796,GO:0006807,GO:0008150,GO:0008152,GO:0008270,GO:0009056,GO:0009058,GO:…	K01624-ko01200 Carbon metabolism;ko01230 Biosynthesis of amino acids;ko00010 Glycolysis / Gluconeogenesis;ko00030 Pentose phosphate pathway;ko00051 Fructose and mannose metabolism;ko00710 Carbon fixation in photosynthetic organisms;ko00680 Methane metabolism	COG0191-Fructose/tagatose bisphosphate aldolase[G]
GE04081	0.93	32.34	-5.11995	9.62e-38	1.24e-36	down	GE04081	3-ketosteroid-9-alpha-monooxygenase oxygenase subunit	-	K15982-ko00984 Steroid degradation	COG4638-Phenylpropionate dioxygenase and related ring-hydroxylating dioxygenases, large terminal subunit[PR]
GE01333	37.98	82.2	-1.1139	1.51e-37	1.95e-36	down	GE01333	Carbamoyl-phosphate synthase large chain	GO:0000050,GO:0003674,GO:0003824,GO:0004087,GO:0004088,GO:0005575,GO:0005622,GO:0005737,GO:0005886,GO:0006082,GO:0006520,GO:0006525,GO:0006526,GO:0006807,GO:0008150,GO:0008152,GO:0008652,GO:0009058,GO:0009064,GO:0009084,GO:0009987,GO:0016020,GO:0016053,GO:0016874,GO:0016879,GO:0016884,GO:0019627,GO:0019752,GO:0034641,GO:0043436,GO:0043603,GO:0043604,GO:0044237,GO:0044238,GO:0044249,GO:0044271,GO:…	K01955-ko00240 Pyrimidine metabolism;ko00250 Alanine, aspartate and glutamate metabolism	COG0458-Carbamoylphosphate synthase large subunit (split gene in MJ)[EF]
GE02079	5.59	52.69	-3.23661	2.62e-37	3.35e-36	down	GE02079	Alpha-ketoglutarate-dependent taurine dioxygenase	-	K03119-ko00920 Sulfur metabolism;ko00430 Taurine and hypotaurine metabolism	COG2175-Probable taurine catabolism dioxygenase[Q]
GE00702	12.76	77.91	-2.61018	4.34e-37	5.52e-36	down	GE00702	putative menaquinol-cytochrome c reductase cytochrome c subunit	GO:0005575,GO:0005886,GO:0005887,GO:0008150,GO:0016020,GO:0016021,GO:0031224,GO:0031226,GO:0040007,GO:0071944	K03889-ko00190 Oxidative phosphorylation	-
GE02026	65.4	168.52	-1.36556	5.99e-37	7.6e-36	down	GE02026	Glutathionyl-hydroquinone reductase YqjG	-	-	COG0435-Predicted glutathione S-transferase[O]
GE00477	81.77	194.22	-1.24805	2.55e-36	3.2e-35	down	GE00477	Stearoyl-CoA 9-desaturase electron transfer partner	-	-	COG1018-Flavodoxin reductases (ferredoxin-NADPH reductases) family 1[C]
GE04723	1.1	36.92	-5.06883	3.18e-36	3.98e-35	down	GE04723	Daunorubicin/doxorubicin resistance ATP-binding protein DrrA	-	-	COG1131-ABC-type multidrug transport system, ATPase component[V]
GE00100	6.77	38.06	-2.49105	3.89e-36	4.85e-35	down	GE00100	Succinate dehydrogenase flavoprotein subunit	GO:0000104,GO:0000166,GO:0001539,GO:0003674,GO:0003824,GO:0005488,GO:0005575,GO:0005622,GO:0005737,GO:0005829,GO:0005886,GO:0006091,GO:0006113,GO:0006928,GO:0006950,GO:0006974,GO:0006996,GO:0008150,GO:0008152,GO:0009055,GO:0009061,GO:0009987,GO:0015980,GO:0016020,GO:0016043,GO:0016491,GO:0016627,GO:0022607,GO:0022900,GO:0030030,GO:0030031,GO:0032991,GO:0033554,GO:0036094,GO:0040011,GO:0043167,GO:…	K00239-ko01200 Carbon metabolism;ko00020 Citrate cycle (TCA cycle);ko00650 Butanoate metabolism;ko00190 Oxidative phosphorylation;ko00720 Carbon fixation pathways in prokaryotes;ko05134 Legionellosis	COG1053-Succinate dehydrogenase/fumarate reductase, flavoprotein subunit[C]
GE02931	51.29	143.05	-1.47977	4.69e-36	5.83e-35	down	GE02931	hypothetical protein	-	K02067-ko02010 ABC transporters	COG1463-ABC-type transport system involved in resistance to organic solvents, periplasmic component[Q]
GE04759	43.58	170.32	-1.96651	5.24e-36	6.5e-35	down	GE04759	UPF0336 protein MAP_4107	GO:0001676,GO:0003674,GO:0003824,GO:0005575,GO:0005618,GO:0005886,GO:0006082,GO:0006629,GO:0006631,GO:0006633,GO:0008150,GO:0008152,GO:0008610,GO:0009058,GO:0009987,GO:0016020,GO:0016053,GO:0016829,GO:0016835,GO:0016836,GO:0019171,GO:0019752,GO:0030312,GO:0030497,GO:0032787,GO:0040007,GO:0042759,GO:0043436,GO:0044237,GO:0044238,GO:0044249,GO:0044255,GO:0044281,GO:0044283,GO:0046394,GO:0071704,GO:…	-	-
GE01106	0.78	25.85	-5.05055	1.02e-35	1.27e-34	down	GE01106	Tetracenomycin C resistance and export protein	-	-	-
GE00768	7.8	28.42	-1.86536	1.3e-35	1.61e-34	down	GE00768	DNA polymerase III subunit alpha	GO:0005575,GO:0005618,GO:0005886,GO:0008150,GO:0016020,GO:0030312,GO:0040007,GO:0071944	K02337-ko00230 Purine metabolism;ko00240 Pyrimidine metabolism;ko03030 DNA replication;ko03430 Mismatch repair;ko03440 Homologous recombination	COG0587-DNA polymerase III, alpha subunit[L]
GE04210	19.91	62.65	-1.65382	1.38e-35	1.7e-34	down	GE04210	Neutral endopeptidase	-	-	COG3590-Predicted metalloendopeptidase[O]
GE04868	87.28	285.76	-1.71108	1.44e-35	1.77e-34	down	GE04868	50S ribosomal protein L22	GO:0003674,GO:0003735,GO:0005198,GO:0005575,GO:0005618,GO:0005622,GO:0005737,GO:0005829,GO:0005840,GO:0008150,GO:0015934,GO:0022625,GO:0022626,GO:0030312,GO:0032991,GO:0040007,GO:0043226,GO:0043228,GO:0043229,GO:0043232,GO:0044391,GO:0071944,GO:1990904	K02890-ko03010 Ribosome	COG0091-Ribosomal protein L22[J]
GE00122	61.16	136.16	-1.15464	3.13e-35	3.83e-34	down	GE00122	Glycerol-3-phosphate dehydrogenase 2	GO:0005575,GO:0005886,GO:0016020,GO:0071944	K00111-ko00564 Glycerophospholipid metabolism	COG0578-Glycerol-3-phosphate dehydrogenase[C]
GE00527	13.15	86.29	-2.71413	4.3e-35	5.25e-34	down	GE00527	ATP-dependent Clp protease proteolytic subunit 1	GO:0005575,GO:0005618,GO:0005622,GO:0005737,GO:0005829,GO:0005886,GO:0008150,GO:0016020,GO:0030312,GO:0040007,GO:0071944	K01358-ko04112 Cell cycle - Caulobacter;ko04212 Longevity regulating pathway - worm	COG0740-Protease subunit of ATP-dependent Clp proteases[OU]
GE04487	18.21	70.23	-1.94736	1.95e-34	2.37e-33	down	GE04487	Adenylosuccinate synthetase	GO:0003674,GO:0003824,GO:0004019,GO:0005575,GO:0005622,GO:0005737,GO:0006139,GO:0006163,GO:0006164,GO:0006167,GO:0006725,GO:0006753,GO:0006793,GO:0006796,GO:0006807,GO:0008150,GO:0008152,GO:0009058,GO:0009117,GO:0009123,GO:0009124,GO:0009126,GO:0009127,GO:0009150,GO:0009152,GO:0009156,GO:0009161,GO:0009165,GO:0009167,GO:0009168,GO:0009259,GO:0009260,GO:0009987,GO:0016874,GO:0016879,GO:0017144,GO:…	K01939-ko00230 Purine metabolism;ko00250 Alanine, aspartate and glutamate metabolism	COG0104-Adenylosuccinate synthase[F]
GE02798	4.52	46.86	-3.37396	2.09e-34	2.53e-33	down	GE02798	Putative acyl-[acyl-carrier-protein] desaturase desA1	-	K03921-ko01212 Fatty acid metabolism;ko00061 Fatty acid biosynthesis;ko01040 Biosynthesis of unsaturated fatty acids	-
GE04165	11.66	50.3	-2.10899	2.36e-34	2.86e-33	down	GE04165	Putative amidohydrolase YtcJ	-	-	COG1574-Predicted metal-dependent hydrolase with the TIM-barrel fold[R]
GE02952	51.83	206.52	-1.99442	3.15e-34	3.79e-33	down	GE02952	hypothetical protein	-	-	-
GE01665	23.56	120.81	-2.35833	5.21e-34	6.25e-33	down	GE01665	Ribosome-recycling factor	GO:0002181,GO:0002184,GO:0003674,GO:0003676,GO:0003723,GO:0005488,GO:0005575,GO:0005618,GO:0005622,GO:0005737,GO:0005886,GO:0006412,GO:0006415,GO:0006518,GO:0006807,GO:0008079,GO:0008135,GO:0008150,GO:0008152,GO:0009058,GO:0009059,GO:0009987,GO:0010467,GO:0016020,GO:0016043,GO:0019538,GO:0022411,GO:0030312,GO:0032984,GO:0034641,GO:0034645,GO:0040007,GO:0043021,GO:0043023,GO:0043043,GO:0043170,GO:…	-	COG0233-Ribosome recycling factor[J]
GE00525	22.48	76.31	-1.76323	6.84e-34	8.18e-33	down	GE00525	Trigger factor	GO:0005575,GO:0005618,GO:0005622,GO:0005737,GO:0005829,GO:0005886,GO:0006950,GO:0007154,GO:0008150,GO:0009267,GO:0009605,GO:0009987,GO:0009991,GO:0016020,GO:0030312,GO:0031667,GO:0031668,GO:0031669,GO:0033554,GO:0042221,GO:0042594,GO:0046677,GO:0050896,GO:0051716,GO:0071496,GO:0071944	-	COG0544-FKBP-type peptidyl-prolyl cis-trans isomerase (trigger factor)[O]
GE00395	11.98	86.07	-2.84488	8.34e-34	9.96e-33	down	GE00395	3-isopropylmalate dehydratase small subunit	GO:0005575,GO:0005886,GO:0006082,GO:0006520,GO:0006551,GO:0006807,GO:0008150,GO:0008152,GO:0008652,GO:0009058,GO:0009081,GO:0009082,GO:0009098,GO:0009987,GO:0016020,GO:0016053,GO:0019752,GO:0040007,GO:0043436,GO:0044237,GO:0044238,GO:0044249,GO:0044281,GO:0044283,GO:0046394,GO:0071704,GO:0071944,GO:1901564,GO:1901566,GO:1901576,GO:1901605,GO:1901607	K01704-ko01210 2-Oxocarboxylic acid metabolism;ko01230 Biosynthesis of amino acids;ko00660 C5-Branched dibasic acid metabolism;ko00290 Valine, leucine and isoleucine biosynthesis	COG0066-3-isopropylmalate dehydratase small subunit[E]
GE04005	6.08	60.08	-3.30474	9.72e-34	1.16e-32	down	GE04005	Sorbitol dehydrogenase	-	-	COG1028-Dehydrogenases with different specificities (related to short-chain alcohol dehydrogenases)[IQR]
GE04878	31.13	139.6	-2.16492	1.1e-33	1.3e-32	down	GE04878	50S ribosomal protein L6	GO:0002181,GO:0003674,GO:0003676,GO:0003723,GO:0003735,GO:0005198,GO:0005488,GO:0005575,GO:0005618,GO:0005622,GO:0005737,GO:0005829,GO:0005840,GO:0005886,GO:0006412,GO:0006518,GO:0006807,GO:0008150,GO:0008152,GO:0009058,GO:0009059,GO:0009987,GO:0010467,GO:0015934,GO:0016020,GO:0019538,GO:0022625,GO:0022626,GO:0030312,GO:0032991,GO:0034641,GO:0034645,GO:0040007,GO:0043043,GO:0043170,GO:0043226,GO:…	K02933-ko03010 Ribosome	COG0097-Ribosomal protein L6P/L9E[J]
GE03699	40.03	89.36	-1.15855	1.6e-33	1.89e-32	down	GE03699	DNA gyrase subunit A	GO:0000166,GO:0000287,GO:0003674,GO:0003824,GO:0003916,GO:0003918,GO:0005488,GO:0005524,GO:0005575,GO:0005618,GO:0005886,GO:0006139,GO:0006259,GO:0006265,GO:0006725,GO:0006807,GO:0006996,GO:0008094,GO:0008144,GO:0008150,GO:0008152,GO:0009987,GO:0016020,GO:0016043,GO:0016462,GO:0016787,GO:0016817,GO:0016818,GO:0016853,GO:0016887,GO:0017076,GO:0017111,GO:0030312,GO:0030554,GO:0032553,GO:0032555,GO:…	-	COG0188-Type IIA topoisomerase (DNA gyrase/topo II, topoisomerase IV), A subunit[L]
GE00828	6.27	48.46	-2.95026	1.69e-33	2e-32	down	GE00828	Quinolinate synthase A	GO:0003674,GO:0003824,GO:0005488,GO:0005575,GO:0005618,GO:0005622,GO:0005737,GO:0005829,GO:0006082,GO:0006139,GO:0006520,GO:0006531,GO:0006725,GO:0006753,GO:0006793,GO:0006796,GO:0006807,GO:0008150,GO:0008152,GO:0008987,GO:0009058,GO:0009066,GO:0009117,GO:0009165,GO:0009435,GO:0009987,GO:0016053,GO:0017144,GO:0018130,GO:0019355,GO:0019359,GO:0019362,GO:0019363,GO:0019438,GO:0019637,GO:0019674,GO:…	K03517-ko00760 Nicotinate and nicotinamide metabolism	COG0379-Quinolinate synthase[H]
GE00140	57.04	126.4	-1.14795	4.31e-33	5.02e-32	down	GE00140	Biotin carboxyl carrier protein	-	K11263-ko01200 Carbon metabolism;ko01212 Fatty acid metabolism;ko00620 Pyruvate metabolism;ko00630 Glyoxylate and dicarboxylate metabolism;ko00640 Propanoate metabolism;ko00061 Fatty acid biosynthesis;ko00280 Valine, leucine and isoleucine degradation;ko00253 Tetracycline biosynthesis	COG4770-Acetyl/propionyl-CoA carboxylase, alpha subunit[I]
GE00381	9.13	40.4	-2.14567	7.06e-33	8.19e-32	down	GE00381	Dihydroxy-acid dehydratase 3	-	K01687-ko01210 2-Oxocarboxylic acid metabolism;ko01230 Biosynthesis of amino acids;ko00290 Valine, leucine and isoleucine biosynthesis;ko00770 Pantothenate and CoA biosynthesis	COG0129-Dihydroxyacid dehydratase/phosphogluconate dehydratase[EG]
GE03131	77.29	358.76	-2.21467	7.39e-33	8.55e-32	down	GE03131	hypothetical protein	-	-	-
GE03683	7.32	41.53	-2.50424	7.61e-33	8.78e-32	down	GE03683	putative FtsW-like protein	GO:0002682,GO:0002684,GO:0008150,GO:0009605,GO:0009607,GO:0009987,GO:0035821,GO:0043207,GO:0044003,GO:0044403,GO:0044419,GO:0048518,GO:0048583,GO:0048584,GO:0050776,GO:0050778,GO:0050789,GO:0050896,GO:0051301,GO:0051701,GO:0051704,GO:0051707,GO:0051817,GO:0052031,GO:0052173,GO:0052200,GO:0052553,GO:0052572,GO:0065007,GO:0075136	-	COG0772-Bacterial cell division membrane protein[D]
GE04588	10.7	241.61	-4.497	1.02e-32	1.17e-31	down	GE04588	hypothetical protein	-	-	-
GE04883	11.89	53.87	-2.17973	3.03e-32	3.46e-31	down	GE04883	Protein translocase subunit SecY	GO:0005575,GO:0005576,GO:0005886,GO:0008150,GO:0016020,GO:0040007,GO:0071944	K03076-ko03060 Protein export;ko03070 Bacterial secretion system;ko02024 Quorum sensing	COG0201-Preprotein translocase subunit SecY[U]
GE00383	48.75	109.16	-1.16297	5.08e-32	5.79e-31	down	GE00383	Acetolactate synthase	GO:0000287,GO:0003674,GO:0003824,GO:0003984,GO:0005488,GO:0005575,GO:0005618,GO:0006082,GO:0006520,GO:0006549,GO:0006573,GO:0006807,GO:0008150,GO:0008152,GO:0008652,GO:0009058,GO:0009081,GO:0009082,GO:0009097,GO:0009099,GO:0009987,GO:0016053,GO:0016740,GO:0016744,GO:0019752,GO:0019842,GO:0030312,GO:0030976,GO:0036094,GO:0040007,GO:0043167,GO:0043168,GO:0043169,GO:0043436,GO:0044237,GO:0044238,GO:…	K01652-ko01210 2-Oxocarboxylic acid metabolism;ko01230 Biosynthesis of amino acids;ko00650 Butanoate metabolism;ko00660 C5-Branched dibasic acid metabolism;ko00290 Valine, leucine and isoleucine biosynthesis;ko00770 Pantothenate and CoA biosynthesis	COG0028-Thiamine pyrophosphate-requiring enzymes [acetolactate synthase, pyruvate dehydrogenase (cytochrome), glyoxylate carboligase, phosphonopyruvate decarboxylase][EH]
GE04170	3.48	40.02	-3.52356	6.97e-32	7.93e-31	down	GE04170	Putative oligopeptide transport ATP-binding protein YkfD	-	K02032-ko02024 Quorum sensing	COG4608-ABC-type oligopeptide transport system, ATPase component[E]
GE01667	67.67	178.35	-1.39812	9.46e-32	1.07e-30	down	GE01667	Elongation factor Ts	GO:0003674,GO:0003676,GO:0003723,GO:0003746,GO:0005488,GO:0005575,GO:0005618,GO:0005622,GO:0005737,GO:0005829,GO:0005886,GO:0006412,GO:0006414,GO:0006518,GO:0006807,GO:0008135,GO:0008150,GO:0008152,GO:0009058,GO:0009059,GO:0009987,GO:0010467,GO:0016020,GO:0019538,GO:0030312,GO:0034641,GO:0034645,GO:0040007,GO:0043043,GO:0043170,GO:0043603,GO:0043604,GO:0044237,GO:0044238,GO:0044249,GO:0044260,GO:…	-	COG0264-Translation elongation factor Ts[J]
GE03197	278.08	677.46	-1.28464	1.05e-31	1.19e-30	down	GE03197	hypothetical protein	-	-	-
GE00990	128.38	359.12	-1.48405	1.16e-31	1.31e-30	down	GE00990	Putative thioredoxin-2	-	K00384-ko00240 Pyrimidine metabolism;ko00450 Selenocompound metabolism	COG3118-Thioredoxin domain-containing protein[O]
GE04786	19.24	64.88	-1.75367	1.33e-31	1.49e-30	down	GE04786	Multidrug resistance protein B-like protein	-	-	-
GE01220	68.19	210.22	-1.62427	1.42e-31	1.59e-30	down	GE01220	UPF0098 protein Mb2164c	-	-	COG1881-Phospholipid-binding protein[R]
GE02391	95.3	326.26	-1.77547	1.48e-31	1.65e-30	down	GE02391	putative protein Mb0973c	-	K04093-ko01230 Biosynthesis of amino acids;ko00400 Phenylalanine, tyrosine and tryptophan biosynthesis	-
GE00207	12.66	56.18	-2.14978	1.94e-31	2.16e-30	down	GE00207	Stearoyl-CoA 9-desaturase	-	-	COG3239-Fatty acid desaturase[I]
GE03932	12.32	57.94	-2.23356	1.99e-31	2.22e-30	down	GE03932	3-ketosteroid-9-alpha-monooxygenase oxygenase subunit	-	K15982-ko00984 Steroid degradation	COG4638-Phenylpropionate dioxygenase and related ring-hydroxylating dioxygenases, large terminal subunit[PR]
GE04758	35.92	277.57	-2.94999	2.5e-31	2.77e-30	down	GE04758	50S ribosomal protein L33 1	-	K02913-ko03010 Ribosome	COG0267-Ribosomal protein L33[J]
GE01581	8.29	204.44	-4.62416	3.7e-31	4.07e-30	down	GE01581	hypothetical protein	-	-	-
GE02804	105.77	220.68	-1.06103	4.74e-31	5.21e-30	down	GE02804	Alcohol dehydrogenase B	-	-	COG1062-Zn-dependent alcohol dehydrogenases, class III[C]
GE03350	3.83	73.56	-4.26351	6.56e-31	7.19e-30	down	GE03350	hypothetical protein	-	-	COG0456-Acetyltransferases[R]
GE04864	44.66	147.65	-1.72513	7.11e-31	7.77e-30	down	GE04864	50S ribosomal protein L4	GO:0003674,GO:0003676,GO:0003723,GO:0003735,GO:0005198,GO:0005488,GO:0005575,GO:0005622,GO:0005737,GO:0005829,GO:0005840,GO:0005886,GO:0006412,GO:0006518,GO:0006807,GO:0008150,GO:0008152,GO:0009058,GO:0009059,GO:0009987,GO:0010467,GO:0016020,GO:0019538,GO:0022626,GO:0032991,GO:0034641,GO:0034645,GO:0040007,GO:0043043,GO:0043170,GO:0043226,GO:0043228,GO:0043229,GO:0043232,GO:0043603,GO:0043604,GO:…	K02926-ko03010 Ribosome	COG0088-Ribosomal protein L4[J]
GE03517	35.35	86.78	-1.29565	9.48e-31	1.03e-29	down	GE03517	Long-chain-fatty-acid--AMP ligase FadD32	GO:0003674,GO:0003824,GO:0005575,GO:0005618,GO:0005886,GO:0006082,GO:0006629,GO:0006631,GO:0006633,GO:0008150,GO:0008152,GO:0008610,GO:0009058,GO:0009273,GO:0009987,GO:0016020,GO:0016043,GO:0016053,GO:0016740,GO:0016772,GO:0016779,GO:0016874,GO:0019752,GO:0022607,GO:0030312,GO:0032787,GO:0040007,GO:0042546,GO:0043436,GO:0044085,GO:0044237,GO:0044238,GO:0044249,GO:0044255,GO:0044281,GO:0044283,GO:…	-	COG0318-Acyl-CoA synthetases (AMP-forming)/AMP-acid ligases II[IQ]
GE02019	59.68	154.9	-1.37602	1.6e-30	1.74e-29	down	GE02019	Adenine deaminase	GO:0000034,GO:0003674,GO:0003824,GO:0006139,GO:0006144,GO:0006145,GO:0006146,GO:0006725,GO:0006807,GO:0008150,GO:0008152,GO:0009056,GO:0009058,GO:0009112,GO:0009113,GO:0009987,GO:0016787,GO:0016810,GO:0016814,GO:0018130,GO:0019239,GO:0019438,GO:0019439,GO:0034641,GO:0034654,GO:0042440,GO:0043094,GO:0043096,GO:0043101,GO:0043103,GO:0044237,GO:0044238,GO:0044248,GO:0044249,GO:0044270,GO:0044271,GO:…	K01488-ko00230 Purine metabolism;ko05340 Primary immunodeficiency	COG1816-Adenosine deaminase[F]
GE03319	11	64.2	-2.54507	1.92e-30	2.09e-29	down	GE03319	putative protein Mb2261	-	-	COG3662-Uncharacterized protein conserved in bacteria[S]
GE01513	54.81	125.58	-1.1961	1.92e-30	2.08e-29	down	GE01513	tRNA-2-methylthio-N(6)-dimethylallyladenosine synthase	-	-	COG0621-2-methylthioadenine synthetase[J]
GE00692	167.11	351.24	-1.07166	1.98e-30	2.14e-29	down	GE00692	putative protein Mb2229	GO:0008150,GO:0009605,GO:0009607,GO:0030682,GO:0042783,GO:0043207,GO:0044403,GO:0044419,GO:0050896,GO:0051701,GO:0051704,GO:0051707,GO:0052173,GO:0052200,GO:0052572,GO:0075136	-	-
GE04535	159.42	392.1	-1.29839	2.83e-30	3.04e-29	down	GE04535	putative protein Rv3129	-	-	COG3467-Predicted flavin-nucleotide-binding protein[R]
GE01169	7.11	28.13	-1.98419	6.54e-30	7.01e-29	down	GE01169	putative helicase HelY	GO:0003674,GO:0003724,GO:0003824,GO:0004386,GO:0005575,GO:0005618,GO:0005622,GO:0005737,GO:0005829,GO:0005886,GO:0006139,GO:0006401,GO:0006725,GO:0006807,GO:0008150,GO:0008152,GO:0008186,GO:0009056,GO:0009057,GO:0009987,GO:0016020,GO:0016070,GO:0016462,GO:0016787,GO:0016817,GO:0016818,GO:0016887,GO:0017111,GO:0019439,GO:0030312,GO:0034641,GO:0034655,GO:0043170,GO:0044237,GO:0044238,GO:0044248,GO:…	-	COG4581-Superfamily II RNA helicase[L]
GE04228	16.5	115.14	-2.80285	1.28e-29	1.37e-28	down	GE04228	hypothetical protein	-	-	COG3607-Predicted lactoylglutathione lyase[R]
GE00894	26.69	137.49	-2.36496	1.73e-29	1.85e-28	down	GE00894	hypothetical protein	-	-	-
GE03437	36.77	122.07	-1.73111	1.86e-29	1.98e-28	down	GE03437	putative protein BCG_0605c	-	-	COG0500-SAM-dependent methyltransferases[QR]
GE00886	27.15	85.71	-1.65851	1.87e-29	1.98e-28	down	GE00886	S-(hydroxymethyl)glutathione dehydrogenase	-	-	COG1063-Threonine dehydrogenase and related Zn-dependent dehydrogenases[ER]
GE02954	41.66	112.09	-1.42792	2.11e-29	2.23e-28	down	GE02954	3-ketoacyl-CoA thiolase	-	K00626-ko01200 Carbon metabolism;ko01212 Fatty acid metabolism;ko00620 Pyruvate metabolism;ko00630 Glyoxylate and dicarboxylate metabolism;ko00640 Propanoate metabolism;ko00650 Butanoate metabolism;ko00720 Carbon fixation pathways in prokaryotes;ko00071 Fatty acid degradation;ko00072 Synthesis and degradation of ketone bodies;ko00280 Valine, leucine and isoleucine degradation;ko00310 Lysine degra…	COG0183-Acetyl-CoA acetyltransferase[I]
GE03524	9.04	55.2	-2.61027	3.97e-29	4.19e-28	down	GE03524	Decaprenyl-phosphate phosphoribosyltransferase	GO:0000287,GO:0003674,GO:0003824,GO:0005488,GO:0005575,GO:0005886,GO:0005887,GO:0006629,GO:0006643,GO:0006664,GO:0008150,GO:0008152,GO:0008610,GO:0009058,GO:0009247,GO:0009987,GO:0016020,GO:0016021,GO:0016740,GO:0016757,GO:0016763,GO:0031224,GO:0031226,GO:0040007,GO:0043167,GO:0043169,GO:0044237,GO:0044238,GO:0044249,GO:0044255,GO:0046467,GO:0046872,GO:0052636,GO:0071704,GO:0071944,GO:1901135,GO:…	-	-
GE02605	7.54	77.06	-3.35335	6.17e-29	6.48e-28	down	GE02605	hypothetical protein	-	-	-
GE02408	9.22	39.9	-2.11355	8.44e-29	8.81e-28	down	GE02408	Long-chain-fatty-acid--CoA ligase	-	-	COG0318-Acyl-CoA synthetases (AMP-forming)/AMP-acid ligases II[IQ]
GE00452	63.27	178.44	-1.49585	1.12e-28	1.16e-27	down	GE00452	hypothetical protein	-	-	-
GE04874	29.14	164.11	-2.49359	1.15e-28	1.19e-27	down	GE04874	50S ribosomal protein L24	GO:0005575,GO:0005618,GO:0005622,GO:0005737,GO:0005829,GO:0005840,GO:0006412,GO:0006518,GO:0006807,GO:0008150,GO:0008152,GO:0009058,GO:0009059,GO:0009987,GO:0010467,GO:0015934,GO:0019538,GO:0022625,GO:0022626,GO:0030312,GO:0032991,GO:0034641,GO:0034645,GO:0040007,GO:0043043,GO:0043170,GO:0043226,GO:0043228,GO:0043229,GO:0043232,GO:0043603,GO:0043604,GO:0044237,GO:0044238,GO:0044249,GO:0044260,GO:…	K02895-ko03010 Ribosome	COG0198-Ribosomal protein L24[J]
GE02810	61.66	166.15	-1.43008	1.17e-28	1.22e-27	down	GE02810	Transcriptional regulatory protein GlnR	-	-	COG0745-Response regulators consisting of a CheY-like receiver domain and a winged-helix DNA-binding domain[TK]
GE02807	7.19	45.56	-2.6637	1.26e-28	1.3e-27	down	GE02807	Phosphate transport system permease protein PstC 2	-	K02037-ko02010 ABC transporters	COG0573-ABC-type phosphate transport system, permease component[P]
GE03400	42.83	110.71	-1.37009	1.56e-28	1.61e-27	down	GE03400	C-5 sterol desaturase	GO:0003674,GO:0003824,GO:0004497,GO:0006629,GO:0006643,GO:0008150,GO:0008152,GO:0009987,GO:0016491,GO:0016705,GO:0016714,GO:0044237,GO:0044238,GO:0044255,GO:0050479,GO:0055114,GO:0071704	-	COG3000-Sterol desaturase[I]
GE04371	7.66	39.5	-2.36644	1.85e-28	1.91e-27	down	GE04371	Putative diacylglycerol O-acyltransferase Mb0919	GO:0000302,GO:0001666,GO:0003674,GO:0003824,GO:0004144,GO:0005575,GO:0005618,GO:0005886,GO:0006629,GO:0006638,GO:0006639,GO:0006641,GO:0006950,GO:0006979,GO:0008150,GO:0008152,GO:0008374,GO:0008610,GO:0009058,GO:0009628,GO:0009987,GO:0010035,GO:0016020,GO:0016411,GO:0016740,GO:0016746,GO:0016747,GO:0019432,GO:0030312,GO:0036293,GO:0040007,GO:0042221,GO:0042493,GO:0044110,GO:0044117,GO:0044119,GO:…	K00635-ko00561 Glycerolipid metabolism	-
GE04891	34.14	127.18	-1.89734	2.03e-28	2.08e-27	down	GE04891	30S ribosomal protein S4	GO:0003674,GO:0003676,GO:0003723,GO:0003735,GO:0005198,GO:0005488,GO:0005575,GO:0005618,GO:0005622,GO:0005737,GO:0005829,GO:0005840,GO:0005886,GO:0006417,GO:0006450,GO:0008150,GO:0009889,GO:0009891,GO:0009893,GO:0010468,GO:0010556,GO:0010557,GO:0010604,GO:0010608,GO:0010628,GO:0015935,GO:0016020,GO:0019222,GO:0019843,GO:0030312,GO:0031323,GO:0031325,GO:0031326,GO:0031328,GO:0032268,GO:0032270,GO:…	K02986-ko03010 Ribosome	COG0522-Ribosomal protein S4 and related proteins[J]
GE00678	19.05	62.72	-1.71913	2.81e-28	2.87e-27	down	GE00678	Glutamine synthetase 1	GO:0001968,GO:0003674,GO:0003824,GO:0004356,GO:0005488,GO:0005515,GO:0005575,GO:0005576,GO:0005618,GO:0005622,GO:0005737,GO:0005829,GO:0005886,GO:0006082,GO:0006520,GO:0006541,GO:0006542,GO:0006807,GO:0008150,GO:0008152,GO:0008652,GO:0009058,GO:0009064,GO:0009084,GO:0009405,GO:0009605,GO:0009607,GO:0009893,GO:0009987,GO:0010468,GO:0010604,GO:0010628,GO:0010755,GO:0010756,GO:0010954,GO:0016020,GO:…	K01915-ko01230 Biosynthesis of amino acids;ko00630 Glyoxylate and dicarboxylate metabolism;ko00910 Nitrogen metabolism;ko00250 Alanine, aspartate and glutamate metabolism;ko00220 Arginine biosynthesis;ko02020 Two-component system;ko04724 Glutamatergic synapse;ko04727 GABAergic synapse	COG0174-Glutamine synthetase[E]
GE01560	23	59.57	-1.37295	2.87e-28	2.92e-27	down	GE01560	Polyribonucleotide nucleotidyltransferase	GO:0005575,GO:0005618,GO:0005622,GO:0005737,GO:0005829,GO:0005886,GO:0016020,GO:0030312,GO:0071944	K00962-ko00230 Purine metabolism;ko00240 Pyrimidine metabolism;ko03018 RNA degradation	COG1185-Polyribonucleotide nucleotidyltransferase (polynucleotide phosphorylase)[J]
GE01580	191.58	391.63	-1.03154	3.18e-28	3.23e-27	down	GE01580	putative HTH-type transcriptional regulator YhgD	-	-	-
GE03393	14.3	46.85	-1.71203	3.74e-28	3.79e-27	down	GE03393	putative ABC transporter ATP-binding protein Mb1303c	-	-	COG1132-ABC-type multidrug transport system, ATPase and permease components[V]
GE00939	7.7	47.46	-2.62378	4.13e-28	4.18e-27	down	GE00939	putative 17.2 kDa protein in melC2-rnhH intergenic region	-	-	COG5637-Predicted integral membrane protein[S]
GE02530	14.49	60.96	-2.07281	4.95e-28	5e-27	down	GE02530	Protein PS1 (Precursor)	-	-	COG0627-Predicted esterase[R]
GE04869	43.48	129.58	-1.57542	6.27e-28	6.32e-27	down	GE04869	30S ribosomal protein S3	GO:0002181,GO:0003674,GO:0003735,GO:0005198,GO:0005575,GO:0005618,GO:0005622,GO:0005737,GO:0005829,GO:0005840,GO:0005886,GO:0006412,GO:0006518,GO:0006807,GO:0008150,GO:0008152,GO:0009058,GO:0009059,GO:0009987,GO:0010467,GO:0015935,GO:0016020,GO:0019538,GO:0022626,GO:0022627,GO:0030312,GO:0032991,GO:0034641,GO:0034645,GO:0040007,GO:0043043,GO:0043170,GO:0043226,GO:0043228,GO:0043229,GO:0043232,GO:…	K02982-ko03010 Ribosome	COG0092-Ribosomal protein S3[J]
GE01271	119.45	296.46	-1.31143	6.65e-28	6.69e-27	down	GE01271	Iron-sulfur cluster assembly scaffold protein IscU	-	-	COG0822-NifU homolog involved in Fe-S cluster formation[C]
GE04507	14.68	60.79	-2.04998	7.22e-28	7.24e-27	down	GE04507	Succinyl-CoA--L-malate CoA-transferase beta subunit	-	K01796-ko00120 Primary bile acid biosynthesis;ko04146 Peroxisome	COG1804-Predicted acyl-CoA transferases/carnitine dehydratase[C]
GE02016	30.73	125.28	-2.02744	1.04e-27	1.04e-26	down	GE02016	DNA protection during starvation protein	-	-	COG0783-DNA-binding ferritin-like protein (oxidative damage protectant)[P]
GE01456	204.7	465.33	-1.18474	1.05e-27	1.05e-26	down	GE01456	hypothetical protein	-	-	-
GE01295	67.24	280.85	-2.06241	1.23e-27	1.22e-26	down	GE01295	putative protein-export membrane protein SecG	GO:0005575,GO:0005886,GO:0016020,GO:0071944	K03075-ko03060 Protein export;ko03070 Bacterial secretion system;ko02024 Quorum sensing	-
GE03797	42.95	147.01	-1.77518	1.24e-27	1.24e-26	down	GE03797	Negative transcription regulator PadR	-	-	COG1695-Predicted transcriptional regulators[K]
GE04710	301.6	662.76	-1.13585	1.37e-27	1.36e-26	down	GE04710	hypothetical protein	-	-	-
GE02794	25.18	108.77	-2.11093	1.44e-27	1.42e-26	down	GE02794	hypothetical protein	-	-	-
GE04168	1.75	27.72	-3.9855	1.49e-27	1.47e-26	down	GE04168	Glutathione transport system permease protein GsiD	-	K02034-ko02024 Quorum sensing	COG1173-ABC-type dipeptide/oligopeptide/nickel transport systems, permease components[EP]
GE00681	79.05	176.99	-1.16283	2.55e-27	2.5e-26	down	GE00681	Lipoyl synthase	GO:0003674,GO:0003824,GO:0005575,GO:0005622,GO:0005737,GO:0006082,GO:0006464,GO:0006629,GO:0006631,GO:0006633,GO:0006790,GO:0006807,GO:0008150,GO:0008152,GO:0008610,GO:0009058,GO:0009106,GO:0009107,GO:0009249,GO:0009987,GO:0010467,GO:0016053,GO:0016740,GO:0016782,GO:0016783,GO:0016992,GO:0018130,GO:0018193,GO:0018205,GO:0019538,GO:0019752,GO:0032787,GO:0036211,GO:0040007,GO:0043170,GO:0043412,GO:…	K03644-ko00785 Lipoic acid metabolism	COG0320-Lipoate synthase[H]
GE01028	19.11	100.55	-2.39551	2.92e-27	2.86e-26	down	GE01028	Arginine repressor	GO:0000976,GO:0001067,GO:0001216,GO:0003674,GO:0003676,GO:0003677,GO:0003690,GO:0003700,GO:0005488,GO:0005575,GO:0006355,GO:0008150,GO:0009889,GO:0009891,GO:0009893,GO:0010468,GO:0010556,GO:0010557,GO:0010604,GO:0010628,GO:0019219,GO:0019222,GO:0031323,GO:0031325,GO:0031326,GO:0031328,GO:0032991,GO:0032993,GO:0043565,GO:0045893,GO:0045935,GO:0048518,GO:0048522,GO:0050789,GO:0050794,GO:0051171,GO:…	-	COG1438-Arginine repressor[K]
GE03962	13.06	114.22	-3.12859	3.09e-27	3.01e-26	down	GE03962	F420-dependent glucose-6-phosphate dehydrogenase	-	-	COG2141-Coenzyme F420-dependent N5,N10-methylene tetrahydromethanopterin reductase and related flavin-dependent oxidoreductases[C]
GE03559	8.68	71.25	-3.03712	3.21e-27	3.13e-26	down	GE03559	Ferritin BfrB	-	-	COG1528-Ferritin-like protein[P]
GE03452	12.19	110.02	-3.174	3.92e-27	3.8e-26	down	GE03452	hypothetical protein	-	-	-
GE04873	12.27	103.45	-3.07573	4.2e-27	4.06e-26	down	GE04873	50S ribosomal protein L14	GO:0003674,GO:0003676,GO:0003723,GO:0003735,GO:0005198,GO:0005488,GO:0005575,GO:0005622,GO:0005737,GO:0005829,GO:0005840,GO:0005886,GO:0008150,GO:0015934,GO:0016020,GO:0019843,GO:0022625,GO:0022626,GO:0032991,GO:0040007,GO:0043226,GO:0043228,GO:0043229,GO:0043232,GO:0044391,GO:0070180,GO:0071944,GO:0097159,GO:1901363,GO:1990904	K02874-ko03010 Ribosome	COG0093-Ribosomal protein L14[J]
GE04325	22.73	54.97	-1.27405	4.22e-27	4.07e-26	down	GE04325	Putative membrane protein mmpL3	-	-	COG2409-Predicted drug exporters of the RND superfamily[R]
GE01299	17.74	63.01	-1.82857	5.95e-27	5.73e-26	down	GE01299	Phosphoglycerate kinase	GO:0005575,GO:0005576,GO:0005622,GO:0005737,GO:0005886,GO:0008150,GO:0016020,GO:0040007,GO:0071944	K00927-ko01200 Carbon metabolism;ko01230 Biosynthesis of amino acids;ko00010 Glycolysis / Gluconeogenesis;ko00710 Carbon fixation in photosynthetic organisms	COG0126-3-phosphoglycerate kinase[G]
GE01364	63.07	143.66	-1.18763	7.34e-27	7.06e-26	down	GE01364	hypothetical protein	-	-	-
GE03472	39.12	89.23	-1.18962	7.58e-27	7.28e-26	down	GE03472	Galactofuranosyl transferase GlfT2	-	-	COG1216-Predicted glycosyltransferases[R]
GE03700	13.23	42.82	-1.69447	8.29e-27	7.94e-26	down	GE03700	DNA gyrase subunit B	GO:0003674,GO:0003824,GO:0003916,GO:0003918,GO:0005575,GO:0006139,GO:0006259,GO:0006265,GO:0006725,GO:0006807,GO:0006996,GO:0007059,GO:0008094,GO:0008150,GO:0008152,GO:0009295,GO:0009987,GO:0016043,GO:0016462,GO:0016787,GO:0016817,GO:0016818,GO:0016853,GO:0016887,GO:0017111,GO:0034335,GO:0034641,GO:0043170,GO:0044237,GO:0044238,GO:0044260,GO:0046483,GO:0051276,GO:0071103,GO:0071704,GO:0071840,GO:…	-	COG0187-Type IIA topoisomerase (DNA gyrase/topo II, topoisomerase IV), B subunit[L]
GE00922	9.78	84.37	-3.10882	9.5e-27	9.06e-26	down	GE00922	Anti-sigma-F factor RsbW	GO:0000166,GO:0003674,GO:0005488,GO:0006355,GO:0008150,GO:0009889,GO:0009890,GO:0009892,GO:0010468,GO:0010556,GO:0010558,GO:0010605,GO:0010629,GO:0016989,GO:0019219,GO:0019222,GO:0031323,GO:0031324,GO:0031326,GO:0031327,GO:0036094,GO:0045892,GO:0045934,GO:0048519,GO:0048523,GO:0050789,GO:0050794,GO:0051171,GO:0051172,GO:0051252,GO:0051253,GO:0060255,GO:0065007,GO:0080090,GO:0097159,GO:0140110,GO:…	-	-
GE01005	10.02	34.65	-1.78997	1.28e-26	1.21e-25	down	GE01005	Helicase IV	-	-	COG3973-Superfamily I DNA and RNA helicases[R]
GE04628	98.09	258.65	-1.39882	1.98e-26	1.88e-25	down	GE04628	putative HTH-type transcriptional regulator Rv0474	GO:0005575,GO:0005618,GO:0005622,GO:0005737,GO:0005829,GO:0030312,GO:0071944	-	-
GE04729	20.96	126.18	-2.58977	2.33e-26	2.2e-25	down	GE04729	hypothetical protein	-	-	-
GE01268	26.04	88.91	-1.77162	2.37e-26	2.23e-25	down	GE01268	Non-homologous end joining protein Ku	GO:0000726,GO:0003674,GO:0003676,GO:0003677,GO:0003690,GO:0005488,GO:0006139,GO:0006259,GO:0006281,GO:0006302,GO:0006303,GO:0006725,GO:0006807,GO:0006950,GO:0006974,GO:0008150,GO:0008152,GO:0009987,GO:0033554,GO:0034641,GO:0043085,GO:0043170,GO:0044093,GO:0044237,GO:0044238,GO:0044260,GO:0046483,GO:0050790,GO:0050896,GO:0051340,GO:0051351,GO:0051716,GO:0065007,GO:0065009,GO:0071704,GO:0090304,GO:…	K10979-ko03450 Non-homologous end-joining	COG1273-Uncharacterized conserved protein[S]
GE04326	32.35	111.56	-1.78598	5.32e-26	4.99e-25	down	GE04326	hypothetical protein	-	-	-
GE03835	201.97	436.48	-1.11177	5.46e-26	5.11e-25	down	GE03835	hypothetical protein	-	-	-
GE03122	8.02	39.63	-2.30492	6.36e-26	5.92e-25	down	GE03122	putative cysteine desulfurase	-	-	COG0520-Selenocysteine lyase[E]
GE01655	75.18	161.91	-1.10677	6.46e-26	5.99e-25	down	GE01655	4-hydroxy-3-methylbut-2-en-1-yl diphosphate synthase	GO:0003674,GO:0003824,GO:0005575,GO:0005618,GO:0005886,GO:0006081,GO:0006082,GO:0006090,GO:0006629,GO:0006644,GO:0006720,GO:0006793,GO:0006796,GO:0008150,GO:0008152,GO:0008299,GO:0008610,GO:0008654,GO:0009058,GO:0009240,GO:0009987,GO:0016020,GO:0016491,GO:0016725,GO:0019288,GO:0019637,GO:0019682,GO:0019752,GO:0030312,GO:0032787,GO:0043436,GO:0044237,GO:0044238,GO:0044249,GO:0044255,GO:0044281,GO:…	K03526-ko00900 Terpenoid backbone biosynthesis	COG0821-Enzyme involved in the deoxyxylulose pathway of isoprenoid biosynthesis[I]
GE00493	14.64	44.85	-1.61519	8.05e-26	7.43e-25	down	GE00493	putative protein ML1998	-	-	COG3336-Predicted membrane protein[S]
GE02552	17.65	53.27	-1.59366	8.98e-26	8.27e-25	down	GE02552	putative protein ML2143	GO:0005575,GO:0005576,GO:0005886,GO:0016020,GO:0071944	-	-
GE01118	8.82	161.07	-4.19077	9.87e-26	9.07e-25	down	GE01118	hypothetical protein	-	-	-
GE04665	24.24	74.19	-1.61384	1.33e-25	1.22e-24	down	GE04665	Signal-transduction histidine kinase senX3	GO:0005575,GO:0005576,GO:0005886,GO:0006464,GO:0006468,GO:0006793,GO:0006796,GO:0006807,GO:0008150,GO:0008152,GO:0009405,GO:0009987,GO:0016020,GO:0016310,GO:0018106,GO:0018193,GO:0018202,GO:0019538,GO:0036211,GO:0043170,GO:0043412,GO:0044237,GO:0044238,GO:0044260,GO:0044267,GO:0044419,GO:0046777,GO:0051704,GO:0071704,GO:0071944,GO:1901564	K07768-ko02020 Two-component system	COG5002-Signal transduction histidine kinase[T]
GE01192	11.64	58.98	-2.34113	1.52e-25	1.39e-24	down	GE01192	UPF0176 protein RHA1_ro00857	-	-	COG1054-Predicted sulfurtransferase[R]
GE02363	22.54	139.75	-2.63229	2.14e-25	1.95e-24	down	GE02363	30S ribosomal protein S14	GO:0003674,GO:0003735,GO:0005198,GO:0005575,GO:0005618,GO:0005622,GO:0005737,GO:0005840,GO:0006412,GO:0006518,GO:0006807,GO:0008150,GO:0008152,GO:0009058,GO:0009059,GO:0009987,GO:0010467,GO:0015935,GO:0019538,GO:0030312,GO:0032991,GO:0034641,GO:0034645,GO:0043043,GO:0043170,GO:0043226,GO:0043228,GO:0043229,GO:0043232,GO:0043603,GO:0043604,GO:0044237,GO:0044238,GO:0044249,GO:0044260,GO:0044267,GO:…	K02954-ko03010 Ribosome	COG0199-Ribosomal protein S14[J]
GE04332	15.71	65	-2.04876	2.16e-25	1.97e-24	down	GE04332	O-acetylserine sulfhydrylase	GO:0000096,GO:0000097,GO:0003674,GO:0003824,GO:0004124,GO:0005488,GO:0005575,GO:0005576,GO:0005622,GO:0005737,GO:0005829,GO:0006082,GO:0006520,GO:0006534,GO:0006535,GO:0006563,GO:0006790,GO:0006807,GO:0008144,GO:0008150,GO:0008152,GO:0008652,GO:0009058,GO:0009069,GO:0009070,GO:0009987,GO:0016053,GO:0016740,GO:0016765,GO:0016829,GO:0016846,GO:0019344,GO:0019752,GO:0019842,GO:0030170,GO:0036094,GO:…	K01738-ko01200 Carbon metabolism;ko01230 Biosynthesis of amino acids;ko00920 Sulfur metabolism;ko00270 Cysteine and methionine metabolism	COG0031-Cysteine synthase[E]
GE00384	29.08	120.33	-2.0489	2.16e-25	1.97e-24	down	GE00384	Putative acetolactate synthase small subunit	GO:0003674,GO:0003824,GO:0003984,GO:0005575,GO:0005618,GO:0005622,GO:0005737,GO:0005829,GO:0005886,GO:0005948,GO:0006082,GO:0006520,GO:0006549,GO:0006573,GO:0006807,GO:0008150,GO:0008152,GO:0008652,GO:0009058,GO:0009081,GO:0009082,GO:0009097,GO:0009099,GO:0009987,GO:0016020,GO:0016053,GO:0016740,GO:0016744,GO:0019752,GO:0030312,GO:0032991,GO:0040007,GO:0043436,GO:0044237,GO:0044238,GO:0044249,GO:…	K01653-ko01210 2-Oxocarboxylic acid metabolism;ko01230 Biosynthesis of amino acids;ko00650 Butanoate metabolism;ko00660 C5-Branched dibasic acid metabolism;ko00290 Valine, leucine and isoleucine biosynthesis;ko00770 Pantothenate and CoA biosynthesis	COG0440-Acetolactate synthase, small (regulatory) subunit[E]
GE02034	10.11	28.1	-1.47479	2.48e-25	2.25e-24	down	GE02034	Putative multidrug export ATP-binding/permease protein YgaD	-	-	COG1132-ABC-type multidrug transport system, ATPase and permease components[V]
GE01836	9.76	30.81	-1.65845	2.76e-25	2.49e-24	down	GE01836	hypothetical protein	-	-	COG1743-Adenine-specific DNA methylase containing a Zn-ribbon[L]
GE04070	4.1	55.68	-3.76346	2.94e-25	2.65e-24	down	GE04070	Flavin-dependent monooxygenase, reductase subunit HsaB	-	K16048-ko00984 Steroid degradation	COG1853-Conserved protein/domain typically associated with flavoprotein oxygenases, DIM6/NTAB family[R]
GE01807	1.35	19.92	-3.88319	3.11e-25	2.8e-24	down	GE01807	NAD(P) transhydrogenase subunit beta	-	K00325-ko00760 Nicotinate and nicotinamide metabolism	COG1282-NAD/NADP transhydrogenase beta subunit[C]
GE03968	7.98	60.31	-2.91794	3.46e-25	3.11e-24	down	GE03968	Outer membrane lipoprotein Blc (Precursor)	-	-	COG3040-Bacterial lipocalin[M]
GE01679	54.22	206.66	-1.93036	4.15e-25	3.72e-24	down	GE01679	putative protein Mb2925c	GO:0005575,GO:0005886,GO:0016020,GO:0071944	-	-
GE04732	0.61	17.41	-4.83496	6.34e-25	5.67e-24	down	GE04732	hypothetical protein	-	-	-
GE02566	11.68	128.86	-3.46369	6.86e-25	6.12e-24	down	GE02566	hypothetical protein	-	-	-
GE03334	53.59	121.46	-1.18045	7.65e-25	6.81e-24	down	GE03334	putative fatty acid methyltransferase	GO:0005575,GO:0005618,GO:0005886,GO:0016020,GO:0030312,GO:0071944	-	COG2230-Cyclopropane fatty acid synthase and related methyltransferases[M]
GE04800	37.52	140.56	-1.90545	8.52e-25	7.57e-24	down	GE04800	30S ribosomal protein S7	GO:0000028,GO:0003674,GO:0003676,GO:0003723,GO:0003729,GO:0003735,GO:0005198,GO:0005488,GO:0005575,GO:0005618,GO:0005622,GO:0005737,GO:0005829,GO:0005840,GO:0005886,GO:0006412,GO:0006518,GO:0006807,GO:0006996,GO:0008150,GO:0008152,GO:0009058,GO:0009059,GO:0009987,GO:0010467,GO:0015935,GO:0016020,GO:0016043,GO:0019538,GO:0019843,GO:0022607,GO:0022613,GO:0022618,GO:0022626,GO:0022627,GO:0030312,GO:…	K02992-ko03010 Ribosome	COG0049-Ribosomal protein S7[J]
GE04832	97.89	200.87	-1.03703	9.23e-25	8.18e-24	down	GE04832	Alcohol dehydrogenase	-	K13953-ko01220 Degradation of aromatic compounds;ko00010 Glycolysis / Gluconeogenesis;ko00071 Fatty acid degradation;ko00350 Tyrosine metabolism;ko00830 Retinol metabolism;ko00625 Chloroalkane and chloroalkene degradation;ko00626 Naphthalene degradation;ko00980 Metabolism of xenobiotics by cytochrome P450;ko00982 Drug metabolism - cytochrome P450	COG1064-Zn-dependent alcohol dehydrogenases[R]
GE03526	1.98	18.01	-3.18523	1.01e-24	8.96e-24	down	GE03526	Galactofuranosyl transferase GlfT2	GO:0000271,GO:0003674,GO:0003824,GO:0005575,GO:0005622,GO:0005737,GO:0005829,GO:0005886,GO:0005975,GO:0005976,GO:0006139,GO:0006629,GO:0006725,GO:0006793,GO:0006807,GO:0008150,GO:0008152,GO:0008194,GO:0008378,GO:0008610,GO:0008653,GO:0008921,GO:0009058,GO:0009059,GO:0009103,GO:0009225,GO:0009273,GO:0009987,GO:0010383,GO:0016020,GO:0016043,GO:0016051,GO:0016740,GO:0016757,GO:0016758,GO:0022607,GO:…	-	COG1216-Predicted glycosyltransferases[R]
GE01003	9.99	78.94	-2.9822	1.09e-24	9.66e-24	down	GE01003	Universal stress protein Rv1636	GO:0005575,GO:0005618,GO:0005886,GO:0008150,GO:0016020,GO:0030312,GO:0042221,GO:0046677,GO:0050896,GO:0071944	-	-
GE04862	28.18	150.81	-2.41999	1.32e-24	1.16e-23	down	GE04862	30S ribosomal protein S10	GO:0003674,GO:0003735,GO:0005198,GO:0005575,GO:0005618,GO:0005622,GO:0005737,GO:0005829,GO:0005840,GO:0005886,GO:0006412,GO:0006518,GO:0006807,GO:0008150,GO:0008152,GO:0009058,GO:0009059,GO:0009987,GO:0010467,GO:0015935,GO:0016020,GO:0019538,GO:0030312,GO:0032991,GO:0034641,GO:0034645,GO:0040007,GO:0043043,GO:0043170,GO:0043226,GO:0043228,GO:0043229,GO:0043232,GO:0043603,GO:0043604,GO:0044237,GO:…	K02946-ko03010 Ribosome	COG0051-Ribosomal protein S10[J]
GE01016	19.9	173.46	-3.12376	1.4e-24	1.23e-23	down	GE01016	50S ribosomal protein L35	GO:0003674,GO:0003735,GO:0005198,GO:0005575,GO:0005622,GO:0005737,GO:0005829,GO:0005840,GO:0015934,GO:0022625,GO:0022626,GO:0032991,GO:0043226,GO:0043228,GO:0043229,GO:0043232,GO:0044391,GO:1990904	K02916-ko03010 Ribosome	COG0291-Ribosomal protein L35[J]
GE00397	34.65	100.48	-1.53598	2.02e-24	1.77e-23	down	GE00397	putative 8-oxo-dGTP diphosphatase 1	-	-	COG2816-NTP pyrophosphohydrolases containing a Zn-finger, probably nucleic-acid-binding[L]
GE01054	18.03	56.81	-1.65575	2.09e-24	1.83e-23	down	GE01054	GTPase Der	GO:0005575,GO:0005618,GO:0005886,GO:0008150,GO:0016020,GO:0030312,GO:0040007,GO:0071944	-	COG1160-Predicted GTPases[R]
GE02270	100.58	239.92	-1.25421	2.4e-24	2.1e-23	down	GE02270	Formate dehydrogenase subunit alpha (Precursor)	-	K00123-ko01200 Carbon metabolism;ko00630 Glyoxylate and dicarboxylate metabolism;ko00680 Methane metabolism	COG0243-Anaerobic dehydrogenases, typically selenocysteine-containing[C]
GE04079	0.82	29.59	-5.17334	2.52e-24	2.2e-23	down	GE04079	putative oxidoreductase MXAN_5909	-	-	COG0300-Short-chain dehydrogenases of various substrate specificities[R]
GE04705	5.99	29.13	-2.28188	2.92e-24	2.54e-23	down	GE04705	Cytochrome c biogenesis protein CcsB	-	-	COG1333-ResB protein required for cytochrome c biosynthesis[O]
GE02512	14.16	57.94	-2.03274	3.52e-24	3.05e-23	down	GE02512	Putative NADP-dependent oxidoreductase YfmJ	-	-	COG2130-Putative NADP-dependent oxidoreductases[R]
GE03163	3.92	38.07	-3.27973	4.86e-24	4.2e-23	down	GE03163	putative HTH-type transcriptional regulator YagI	-	-	COG1414-Transcriptional regulator[K]
GE02971	6.16	36.19	-2.55459	5.46e-24	4.71e-23	down	GE02971	Beta-ketoadipyl-CoA thiolase	GO:0003674,GO:0003676,GO:0003723,GO:0003729,GO:0003824,GO:0003988,GO:0005488,GO:0005575,GO:0005622,GO:0005737,GO:0005739,GO:0005740,GO:0005758,GO:0005777,GO:0005782,GO:0006082,GO:0006629,GO:0006631,GO:0006635,GO:0008150,GO:0008152,GO:0009056,GO:0009062,GO:0009987,GO:0016042,GO:0016054,GO:0016408,GO:0016740,GO:0016746,GO:0016747,GO:0019395,GO:0019752,GO:0030258,GO:0031907,GO:0031967,GO:0031970,GO:…	K00626-ko01200 Carbon metabolism;ko01212 Fatty acid metabolism;ko00620 Pyruvate metabolism;ko00630 Glyoxylate and dicarboxylate metabolism;ko00640 Propanoate metabolism;ko00650 Butanoate metabolism;ko00720 Carbon fixation pathways in prokaryotes;ko00071 Fatty acid degradation;ko00072 Synthesis and degradation of ketone bodies;ko00280 Valine, leucine and isoleucine degradation;ko00310 Lysine degra…	COG0183-Acetyl-CoA acetyltransferase[I]
GE03718	107.45	236.71	-1.13946	5.5e-24	4.74e-23	down	GE03718	hypothetical protein	-	-	-
GE01467	147.26	328.15	-1.15599	5.58e-24	4.8e-23	down	GE01467	K(+)/H(+) antiporter subunit KhtT	-	-	COG0490-Putative regulatory, ligand-binding protein related to C-terminal domains of K+ channels[P]
GE04002	23.89	68.28	-1.51506	5.63e-24	4.83e-23	down	GE04002	hypothetical protein	-	-	-
GE04572	4.56	19.43	-2.09118	6.95e-24	5.95e-23	down	GE04572	putative K(+)/H(+) antiporter subunit A/B	-	-	COG1009-NADH:ubiquinone oxidoreductase subunit 5 (chain L)/Multisubunit Na+/H+ antiporter, MnhA subunit[CP]
GE00605	125.47	253.75	-1.01607	7.19e-24	6.15e-23	down	GE00605	DNA repair protein RecO	GO:0005575,GO:0005618,GO:0030312,GO:0071944	K03584-ko03440 Homologous recombination	COG1381-Recombinational DNA repair protein (RecF pathway)[L]
GE02795	121.75	304.94	-1.3246	9.05e-24	7.71e-23	down	GE02795	hypothetical protein	-	-	-
GE03485	4.21	26.52	-2.65519	9.28e-24	7.89e-23	down	GE03485	putative decaprenylphosphoryl-beta-D-ribose oxidase	-	-	COG0277-FAD/FMN-containing dehydrogenases[C]
GE01536	70.01	165.18	-1.23841	1.06e-23	9e-23	down	GE01536	35 kDa protein	GO:0005575,GO:0005618,GO:0005622,GO:0005737,GO:0005886,GO:0016020,GO:0030312,GO:0071944	-	-
GE04684	40.32	106.5	-1.40129	1.24e-23	1.04e-22	down	GE04684	Porphobilinogen deaminase	GO:0003674,GO:0003824,GO:0004418,GO:0005575,GO:0005622,GO:0005737,GO:0005886,GO:0006725,GO:0006778,GO:0006779,GO:0006783,GO:0006807,GO:0008150,GO:0008152,GO:0009058,GO:0009987,GO:0016020,GO:0016740,GO:0016765,GO:0018130,GO:0019438,GO:0033013,GO:0033014,GO:0034641,GO:0040007,GO:0042168,GO:0042440,GO:0044237,GO:0044249,GO:0044271,GO:0046148,GO:0046483,GO:0071704,GO:0071944,GO:1901360,GO:1901362,GO:…	K01749-ko00860 Porphyrin and chlorophyll metabolism	COG0181-Porphobilinogen deaminase[H]
GE02925	17.18	53.22	-1.63124	1.26e-23	1.06e-22	down	GE02925	Trehalose-phosphate synthase	GO:0003674,GO:0003824,GO:0003825,GO:0005488,GO:0005575,GO:0005618,GO:0005622,GO:0005737,GO:0005829,GO:0005886,GO:0005975,GO:0005984,GO:0005991,GO:0005992,GO:0006793,GO:0006796,GO:0006950,GO:0008150,GO:0008152,GO:0008194,GO:0009058,GO:0009311,GO:0009312,GO:0009987,GO:0016020,GO:0016051,GO:0016311,GO:0016740,GO:0016757,GO:0016758,GO:0016787,GO:0016788,GO:0016791,GO:0030145,GO:0030312,GO:0033554,GO:…	K00697-ko00500 Starch and sucrose metabolism	COG0380-Trehalose-6-phosphate synthase[G]
GE02848	40.93	140.57	-1.78006	1.94e-23	1.63e-22	down	GE02848	Vitamin B12 transport periplasmic protein BtuE	-	K00432-ko00590 Arachidonic acid metabolism;ko00480 Glutathione metabolism;ko04918 Thyroid hormone synthesis	COG0386-Glutathione peroxidase[O]
GE01835	1.03	15.56	-3.91713	2.06e-23	1.73e-22	down	GE01835	hypothetical protein	-	-	COG1479-Uncharacterized conserved protein[S]
GE04627	22.66	65.95	-1.54122	2.96e-23	2.48e-22	down	GE04627	putative protein YjiN	-	-	COG2733-Predicted membrane protein[S]
GE00965	37.12	221.48	-2.57691	3.43e-23	2.86e-22	down	GE00965	putative tautomerase K2	-	K01821-ko01220 Degradation of aromatic compounds;ko00362 Benzoate degradation;ko00622 Xylene degradation;ko00621 Dioxin degradation	COG1942-Uncharacterized protein, 4-oxalocrotonate tautomerase homolog[R]
GE04239	33.26	125.28	-1.9133	4.46e-23	3.71e-22	down	GE04239	Organic hydroperoxide resistance transcriptional regulator	-	-	COG1846-Transcriptional regulators[K]
GE04683	18.98	58.38	-1.62099	4.47e-23	3.71e-22	down	GE04683	Glutamyl-tRNA reductase	GO:0008150,GO:0040007	K02492-ko00860 Porphyrin and chlorophyll metabolism	COG0373-Glutamyl-tRNA reductase[H]
GE03689	340.44	704.7	-1.04961	4.66e-23	3.87e-22	down	GE03689	Cell division protein CrgA	-	-	-
GE03376	111.9	264.55	-1.24133	6.07e-23	5.03e-22	down	GE03376	hypothetical protein	-	-	COG4315-Uncharacterized protein conserved in bacteria[S]
GE04163	0.14	13.55	-6.59672	7.18e-23	5.93e-22	down	GE04163	putative D,D-dipeptide-binding periplasmic protein DdpA (Precursor)	-	K02035-ko02024 Quorum sensing	COG0747-ABC-type dipeptide transport system, periplasmic component[E]
GE00664	26.09	55.61	-1.09185	1.25e-22	1.03e-21	down	GE00664	Glutamate-ammonia-ligase adenylyltransferase	GO:0000820,GO:0003674,GO:0003824,GO:0005575,GO:0005618,GO:0005622,GO:0005737,GO:0005829,GO:0005886,GO:0006521,GO:0008150,GO:0008882,GO:0010565,GO:0016020,GO:0016740,GO:0016772,GO:0016779,GO:0019222,GO:0030312,GO:0031323,GO:0033238,GO:0040007,GO:0042221,GO:0050789,GO:0050794,GO:0050896,GO:0051171,GO:0060359,GO:0062012,GO:0065007,GO:0070566,GO:0071944,GO:0080090,GO:1901698	-	COG1391-Glutamine synthetase adenylyltransferase[OT]
GE04760	201.87	420.27	-1.05789	1.34e-22	1.1e-21	down	GE04760	3-hydroxybutyryl-CoA dehydratase	-	-	COG2030-Acyl dehydratase[I]
GE01168	126.55	351.43	-1.47353	1.47e-22	1.2e-21	down	GE01168	putative protein Mb1767	-	-	-
GE00807	9.17	62.55	-2.77002	1.68e-22	1.37e-21	down	GE00807	Alkyl hydroperoxide reductase subunit C	-	K03386-ko04214 Apoptosis - fly	COG0450-Peroxiredoxin[O]
GE04465	17.84	94.05	-2.39831	2.66e-22	2.17e-21	down	GE04465	hypothetical protein	-	-	-
GE00218	56.88	239.38	-2.07331	2.96e-22	2.41e-21	down	GE00218	Biotinylated protein TB7.3-like protein	-	-	COG0511-Biotin carboxyl carrier protein[I]
GE01539	91.16	210.46	-1.20707	3.12e-22	2.54e-21	down	GE01539	Putative CDP-diacylglycerol--glycerol-3-phosphate 3-phosphatidyl-transferase 2	GO:0003674,GO:0003824,GO:0005575,GO:0005618,GO:0006629,GO:0006644,GO:0006650,GO:0006793,GO:0006796,GO:0008150,GO:0008152,GO:0008444,GO:0008610,GO:0008654,GO:0009058,GO:0009987,GO:0016740,GO:0016772,GO:0016780,GO:0017169,GO:0019637,GO:0030312,GO:0040007,GO:0044237,GO:0044238,GO:0044249,GO:0044255,GO:0045017,GO:0046474,GO:0046486,GO:0071704,GO:0071944,GO:0090407,GO:1901576	K00995-ko00564 Glycerophospholipid metabolism	-
GE04564	4.24	40.78	-3.26573	3.26e-22	2.64e-21	down	GE04564	Superoxide dismutase (Precursor)	GO:0000302,GO:0000303,GO:0000305,GO:0003674,GO:0003824,GO:0004784,GO:0005575,GO:0005576,GO:0005615,GO:0005618,GO:0005886,GO:0006801,GO:0006950,GO:0006979,GO:0008150,GO:0008152,GO:0009605,GO:0009607,GO:0009636,GO:0009987,GO:0010035,GO:0016020,GO:0016209,GO:0016491,GO:0016721,GO:0019430,GO:0019725,GO:0030312,GO:0030682,GO:0033194,GO:0033554,GO:0034599,GO:0034614,GO:0042221,GO:0042592,GO:0043207,GO:…	K04565-ko04146 Peroxisome;ko04213 Longevity regulating pathway - multiple species;ko05014 Amyotrophic lateral sclerosis (ALS);ko05016 Huntington's disease;ko05020 Prion diseases	COG2032-Cu/Zn superoxide dismutase[P]
GE04884	26.05	101.78	-1.9661	4.67e-22	3.77e-21	down	GE04884	Adenylate kinase	GO:0000166,GO:0003674,GO:0003824,GO:0004017,GO:0004550,GO:0005488,GO:0005524,GO:0005575,GO:0005618,GO:0005622,GO:0005737,GO:0005829,GO:0005886,GO:0006139,GO:0006144,GO:0006163,GO:0006164,GO:0006165,GO:0006167,GO:0006725,GO:0006753,GO:0006793,GO:0006796,GO:0006807,GO:0008144,GO:0008150,GO:0008152,GO:0009058,GO:0009112,GO:0009117,GO:0009123,GO:0009124,GO:0009126,GO:0009127,GO:0009132,GO:0009141,GO:…	K00939-ko00230 Purine metabolism	COG0563-Adenylate kinase and related kinases[F]
GE03057	43.11	219.31	-2.34688	4.83e-22	3.9e-21	down	GE03057	hypothetical protein	-	-	-
GE00090	10.66	41.93	-1.97578	4.96e-22	3.99e-21	down	GE00090	Methionine gamma-lyase	-	K01740-ko00270 Cysteine and methionine metabolism	COG2873-O-acetylhomoserine sulfhydrylase[E]
GE01015	108.18	250.87	-1.21351	5.31e-22	4.27e-21	down	GE01015	Translation initiation factor IF-3	GO:0003674,GO:0003676,GO:0003723,GO:0003743,GO:0005488,GO:0005575,GO:0005622,GO:0005737,GO:0005829,GO:0005886,GO:0006412,GO:0006413,GO:0006518,GO:0006807,GO:0006996,GO:0008135,GO:0008150,GO:0008152,GO:0009058,GO:0009059,GO:0009987,GO:0010467,GO:0016020,GO:0016043,GO:0019538,GO:0022411,GO:0032790,GO:0032984,GO:0032988,GO:0034641,GO:0034645,GO:0040007,GO:0043021,GO:0043022,GO:0043043,GO:0043170,GO:…	-	COG0290-Translation initiation factor 3 (IF-3)[J]
GE00919	38.87	113.21	-1.54227	6.26e-22	5.02e-21	down	GE00919	hypothetical protein	-	-	-
GE01618	18.78	56.67	-1.59339	7.1e-22	5.68e-21	down	GE01618	Mycothione reductase	GO:0000166,GO:0003674,GO:0003824,GO:0005488,GO:0005575,GO:0005622,GO:0005737,GO:0005829,GO:0006790,GO:0008150,GO:0008152,GO:0009987,GO:0010126,GO:0016137,GO:0016491,GO:0016651,GO:0016667,GO:0016668,GO:0036094,GO:0040007,GO:0043167,GO:0043168,GO:0044237,GO:0050627,GO:0050660,GO:0050661,GO:0055114,GO:0070402,GO:0071704,GO:0097159,GO:1901135,GO:1901265,GO:1901363,GO:1901657	-	COG1249-Pyruvate/2-oxoglutarate dehydrogenase complex, dihydrolipoamide dehydrogenase (E3) component, and related enzymes[C]
GE02320	36.81	84.35	-1.19629	7.26e-22	5.8e-21	down	GE02320	Methionine--tRNA ligase	GO:0003674,GO:0003824,GO:0004812,GO:0004825,GO:0005575,GO:0005622,GO:0005737,GO:0005886,GO:0006082,GO:0006139,GO:0006399,GO:0006412,GO:0006418,GO:0006431,GO:0006518,GO:0006520,GO:0006725,GO:0006807,GO:0008150,GO:0008152,GO:0009058,GO:0009059,GO:0009987,GO:0010467,GO:0016020,GO:0016070,GO:0016874,GO:0016875,GO:0019538,GO:0019752,GO:0034641,GO:0034645,GO:0034660,GO:0040007,GO:0043038,GO:0043039,GO:…	K01874-ko00450 Selenocompound metabolism;ko00970 Aminoacyl-tRNA biosynthesis	COG0143-Methionyl-tRNA synthetase[J]
GE00703	97.64	230.04	-1.23634	8.53e-22	6.8e-21	down	GE00703	putative cytochrome c oxidase subunit 3	GO:0005575,GO:0005886,GO:0008150,GO:0016020,GO:0040007,GO:0071944	K02276-ko00190 Oxidative phosphorylation	COG1845-Heme/copper-type cytochrome/quinol oxidase, subunit 3[C]
GE01298	49.09	127.88	-1.38129	9.64e-22	7.68e-21	down	GE01298	Triosephosphate isomerase	GO:0003674,GO:0003824,GO:0004807,GO:0005575,GO:0005576,GO:0005622,GO:0005737,GO:0005829,GO:0005886,GO:0005975,GO:0005996,GO:0006006,GO:0006066,GO:0006071,GO:0006081,GO:0006082,GO:0006090,GO:0006091,GO:0006094,GO:0006096,GO:0006139,GO:0006163,GO:0006164,GO:0006165,GO:0006725,GO:0006753,GO:0006754,GO:0006757,GO:0006793,GO:0006796,GO:0006807,GO:0008150,GO:0008152,GO:0009056,GO:0009058,GO:0009117,GO:…	K01803-ko01200 Carbon metabolism;ko01230 Biosynthesis of amino acids;ko00010 Glycolysis / Gluconeogenesis;ko00051 Fructose and mannose metabolism;ko00562 Inositol phosphate metabolism;ko00710 Carbon fixation in photosynthetic organisms	COG0149-Triosephosphate isomerase[G]
GE04197	37.77	99.27	-1.39412	1.06e-21	8.41e-21	down	GE04197	Transcriptional regulatory protein LiaR	-	-	COG2197-Response regulator containing a CheY-like receiver domain and an HTH DNA-binding domain[TK]
GE02103	12.71	94.79	-2.89877	1.09e-21	8.67e-21	down	GE02103	hypothetical protein	-	-	-
GE00104	29.26	77.79	-1.41065	1.55e-21	1.23e-20	down	GE00104	hypothetical protein	-	-	-
GE03027	10.46	59.36	-2.50461	2.1e-21	1.66e-20	down	GE03027	HTH-type transcriptional repressor KstR	GO:0000976,GO:0001067,GO:0003674,GO:0003676,GO:0003677,GO:0003690,GO:0003700,GO:0005488,GO:0005515,GO:0005575,GO:0005622,GO:0005737,GO:0005829,GO:0006355,GO:0008150,GO:0009889,GO:0010468,GO:0010556,GO:0019219,GO:0019222,GO:0031323,GO:0031326,GO:0042802,GO:0042803,GO:0043565,GO:0046983,GO:0050789,GO:0050794,GO:0051171,GO:0051252,GO:0060255,GO:0065007,GO:0080090,GO:0097159,GO:0140110,GO:1901363,GO:…	-	COG1309-Transcriptional regulator[K]
GE00121	2.42	19.77	-3.03023	2.65e-21	2.09e-20	down	GE00121	Glycerol kinase	GO:0003674,GO:0003824,GO:0004370,GO:0005975,GO:0006066,GO:0006071,GO:0006793,GO:0006796,GO:0008150,GO:0008152,GO:0009987,GO:0016301,GO:0016310,GO:0016740,GO:0016772,GO:0016773,GO:0019400,GO:0019751,GO:0044237,GO:0044238,GO:0044262,GO:0044281,GO:0071704,GO:1901615	K00864-ko00561 Glycerolipid metabolism;ko03320 PPAR signaling pathway;ko04626 Plant-pathogen interaction	COG0554-Glycerol kinase[C]
GE04066	4.66	24.61	-2.40084	2.86e-21	2.25e-20	down	GE04066	3-oxocholest-4-en-26-oate--CoA ligase	-	-	COG0318-Acyl-CoA synthetases (AMP-forming)/AMP-acid ligases II[IQ]
GE00226	14.02	49.51	-1.82023	3.37e-21	2.64e-20	down	GE00226	hypothetical protein	-	-	-
GE04166	1.07	14.82	-3.79186	4.3e-21	3.37e-20	down	GE04166	Putative ABC transporter peptide-binding protein BRA0409/BS1330_II0406 (Precursor)	-	K02035-ko02024 Quorum sensing	COG0747-ABC-type dipeptide transport system, periplasmic component[E]
GE00135	2.64	19.94	-2.91706	4.47e-21	3.5e-20	down	GE00135	Putative Rieske 2Fe-2S iron-sulfur protein MSMEG_6410/MSMEI_6242	-	-	COG2220-Predicted Zn-dependent hydrolases of the beta-lactamase fold[R]
GE00101	20.87	97.95	-2.23061	6.03e-21	4.71e-20	down	GE00101	hypothetical protein	-	K00242-ko01200 Carbon metabolism;ko00020 Citrate cycle (TCA cycle);ko00650 Butanoate metabolism;ko00190 Oxidative phosphorylation;ko00720 Carbon fixation pathways in prokaryotes	COG2142-Succinate dehydrogenase, hydrophobic anchor subunit[C]
GE01551	50.33	150.47	-1.57999	6.8e-21	5.3e-20	down	GE01551	hypothetical protein	-	-	-
GE00318	22.4	65.07	-1.53849	1.01e-20	7.8e-20	down	GE00318	hypothetical protein	-	-	-
GE00760	4.54	37.88	-3.06067	1.06e-20	8.22e-20	down	GE00760	hypothetical protein	-	-	-
GE04739	81.9	212.62	-1.37634	1.22e-20	9.42e-20	down	GE04739	hypothetical protein	-	-	-
GE04096	3.37	20.61	-2.61252	1.59e-20	1.22e-19	down	GE04096	Long-chain-fatty-acid--CoA ligase	-	-	COG0318-Acyl-CoA synthetases (AMP-forming)/AMP-acid ligases II[IQ]
GE00283	3.64	22.29	-2.61439	1.59e-20	1.22e-19	down	GE00283	Multicopper oxidase mco	-	-	COG2132-Putative multicopper oxidases[Q]
GE02924	29.73	190.23	-2.67775	2.03e-20	1.55e-19	down	GE02924	hypothetical protein	-	-	-
GE01400	126.86	313.44	-1.30495	2.32e-20	1.77e-19	down	GE01400	putative protein Mb2619c (Precursor)	-	K03210-ko03060 Protein export;ko03070 Bacterial secretion system;ko02024 Quorum sensing	COG1862-Preprotein translocase subunit YajC[U]
GE01126	65.72	193.54	-1.55823	2.61e-20	1.99e-19	down	GE01126	hypothetical protein	-	-	-
GE01719	47.51	115.27	-1.27871	2.67e-20	2.03e-19	down	GE01719	hypothetical protein	-	-	-
GE00848	38.08	92.95	-1.28742	2.7e-20	2.05e-19	down	GE00848	Histidinol-phosphate aminotransferase	-	K00817-ko01230 Biosynthesis of amino acids;ko00340 Histidine metabolism;ko00350 Tyrosine metabolism;ko00360 Phenylalanine metabolism;ko00400 Phenylalanine, tyrosine and tryptophan biosynthesis;ko00960 Tropane, piperidine and pyridine alkaloid biosynthesis;ko00401 Novobiocin biosynthesis	COG0079-Histidinol-phosphate/aromatic aminotransferase and cobyric acid decarboxylase[E]
GE02257	14.66	46.02	-1.65038	2.79e-20	2.11e-19	down	GE02257	Glucosamine-1-phosphate N-acetyltransferase	GO:0000287,GO:0003674,GO:0003824,GO:0003977,GO:0005488,GO:0008080,GO:0008150,GO:0016407,GO:0016410,GO:0016740,GO:0016746,GO:0016747,GO:0016772,GO:0016779,GO:0019134,GO:0022610,GO:0035635,GO:0040007,GO:0043167,GO:0043169,GO:0044403,GO:0044406,GO:0044409,GO:0044419,GO:0044650,GO:0046872,GO:0051701,GO:0051704,GO:0070569	K04042-ko00520 Amino sugar and nucleotide sugar metabolism	COG1207-N-acetylglucosamine-1-phosphate uridyltransferase (contains nucleotidyltransferase and I-patch acetyltransferase domains)[M]
GE00619	22.98	55.65	-1.276	4.25e-20	3.22e-19	down	GE00619	DNA primase	GO:0005575,GO:0005886,GO:0008150,GO:0016020,GO:0040007,GO:0071944	K02316-ko03030 DNA replication	COG0358-DNA primase (bacterial type)[L]
GE04771	17.16	57.05	-1.73318	4.35e-20	3.29e-19	down	GE04771	hypothetical protein	-	K02067-ko02010 ABC transporters	COG1463-ABC-type transport system involved in resistance to organic solvents, periplasmic component[Q]
GE03422	30.73	106.93	-1.79895	4.88e-20	3.68e-19	down	GE03422	hypothetical protein	-	-	-
GE04474	18.84	66.18	-1.8126	5.91e-20	4.45e-19	down	GE04474	putative membrane protein Rv0364	-	-	COG0586-Uncharacterized membrane-associated protein[S]
GE02233	49.35	169.48	-1.77999	6.04e-20	4.54e-19	down	GE02233	hypothetical protein	-	-	-
GE00150	43.03	126.68	-1.55777	8.16e-20	6.12e-19	down	GE00150	hypothetical protein	-	-	-
GE03068	16.29	68.01	-2.06176	8.67e-20	6.49e-19	down	GE03068	Thiocyanate hydrolase subunit gamma	-	-	-
GE01668	37.87	102.05	-1.43015	9.83e-20	7.34e-19	down	GE01668	30S ribosomal protein S2	GO:0003674,GO:0003735,GO:0005198,GO:0005575,GO:0005618,GO:0005622,GO:0005737,GO:0005829,GO:0005840,GO:0005886,GO:0006412,GO:0006518,GO:0006807,GO:0008150,GO:0008152,GO:0009058,GO:0009059,GO:0009987,GO:0010467,GO:0015935,GO:0016020,GO:0019538,GO:0022626,GO:0022627,GO:0030312,GO:0032991,GO:0034641,GO:0034645,GO:0040007,GO:0043043,GO:0043170,GO:0043226,GO:0043228,GO:0043229,GO:0043232,GO:0043603,GO:…	K02967-ko03010 Ribosome	COG0052-Ribosomal protein S2[J]
GE01334	15.22	51.2	-1.75018	9.99e-20	7.45e-19	down	GE01334	Carbamoyl-phosphate synthase small chain	GO:0000050,GO:0005575,GO:0005622,GO:0005737,GO:0005951,GO:0006082,GO:0006520,GO:0006525,GO:0006526,GO:0006807,GO:0008150,GO:0008152,GO:0008652,GO:0009058,GO:0009064,GO:0009084,GO:0009987,GO:0016053,GO:0019627,GO:0019752,GO:0032991,GO:0034641,GO:0040007,GO:0043436,GO:0043603,GO:0043604,GO:0044237,GO:0044238,GO:0044249,GO:0044271,GO:0044281,GO:0044283,GO:0046394,GO:0071704,GO:0071941,GO:1901564,GO:…	K01956-ko00240 Pyrimidine metabolism;ko00250 Alanine, aspartate and glutamate metabolism	COG0505-Carbamoylphosphate synthase small subunit[EF]
GE00810	59.78	140.34	-1.23119	1.09e-19	8.08e-19	down	GE00810	hypothetical protein	-	-	-
GE04279	50.34	123.75	-1.29765	1.11e-19	8.27e-19	down	GE04279	Hydrogenase isoenzymes nickel incorporation protein HypB	-	-	COG0378-Ni2+-binding GTPase involved in regulation of expression and maturation of urease and hydrogenase[OK]
GE02406	5.41	45.33	-3.06677	1.3e-19	9.69e-19	down	GE02406	hypothetical protein	-	-	-
GE01479	26.4	75.69	-1.51956	1.34e-19	9.92e-19	down	GE01479	UDP-glucose 4-epimerase	-	K01784-ko00052 Galactose metabolism;ko00520 Amino sugar and nucleotide sugar metabolism	COG1087-UDP-glucose 4-epimerase[M]
GE04290	95.31	200.37	-1.07197	1.39e-19	1.03e-18	down	GE04290	hypothetical protein	-	-	-
GE00637	54.25	133.91	-1.30357	1.52e-19	1.12e-18	down	GE00637	hypothetical protein	-	-	COG1814-Uncharacterized membrane protein[S]
GE02387	4.54	32.37	-2.83389	2.05e-19	1.51e-18	down	GE02387	Succinyl-CoA ligase subunit alpha	GO:0005575,GO:0005618,GO:0005622,GO:0005737,GO:0005829,GO:0005886,GO:0008150,GO:0016020,GO:0030312,GO:0040007,GO:0071944	K01902-ko01200 Carbon metabolism;ko00020 Citrate cycle (TCA cycle);ko00640 Propanoate metabolism;ko00660 C5-Branched dibasic acid metabolism;ko00720 Carbon fixation pathways in prokaryotes	COG0074-Succinyl-CoA synthetase, alpha subunit[C]
GE02086	77.17	224.46	-1.54035	2.14e-19	1.57e-18	down	GE02086	Ferredoxin	-	-	-
GE03047	25.27	90.25	-1.8365	2.15e-19	1.58e-18	down	GE03047	Putative lipoprotein LpqE (Precursor)	-	-	-
GE02808	11.27	43.48	-1.94786	2.17e-19	1.59e-18	down	GE02808	Phosphate-binding protein PstS 3 (Precursor)	-	K02040-ko02010 ABC transporters;ko02020 Two-component system;ko05152 Tuberculosis	COG0226-ABC-type phosphate transport system, periplasmic component[P]
GE00989	9.22	26.93	-1.54638	2.81e-19	2.05e-18	down	GE00989	DNA polymerase I	GO:0003674,GO:0003824,GO:0003887,GO:0004518,GO:0004527,GO:0005575,GO:0005618,GO:0005622,GO:0005737,GO:0005886,GO:0006139,GO:0006259,GO:0006260,GO:0006261,GO:0006281,GO:0006725,GO:0006807,GO:0006950,GO:0006974,GO:0008150,GO:0008152,GO:0008409,GO:0009058,GO:0009059,GO:0009987,GO:0016020,GO:0016740,GO:0016772,GO:0016779,GO:0016787,GO:0016788,GO:0018130,GO:0019438,GO:0030312,GO:0033554,GO:0034061,GO:…	K02335-ko00230 Purine metabolism;ko00240 Pyrimidine metabolism;ko03030 DNA replication;ko03410 Base excision repair;ko03420 Nucleotide excision repair;ko03440 Homologous recombination	COG0749-DNA polymerase I - 3'-5' exonuclease and polymerase domains[L]
GE00307	73.26	174.56	-1.25263	3.07e-19	2.24e-18	down	GE00307	5,6-dimethylbenzimidazole synthase	-	K04719-ko00740 Riboflavin metabolism	COG0778-Nitroreductase[C]
GE03279	4.93	18.8	-1.93107	3.13e-19	2.29e-18	down	GE03279	HTH-type transcriptional regulator MalT	-	-	COG2909-ATP-dependent transcriptional regulator[K]
GE00535	49.32	134.23	-1.44446	3.2e-19	2.33e-18	down	GE00535	Puromycin N-acetyltransferase	-	-	-
GE01157	49.51	129.87	-1.39128	3.65e-19	2.66e-18	down	GE01157	hypothetical protein	-	-	-
GE02984	3.69	30.34	-3.03953	4e-19	2.9e-18	down	GE02984	putative oxidoreductase MSMEG_2408/MSMEI_2347	-	-	COG0656-Aldo/keto reductases, related to diketogulonate reductase[R]
GE02836	27.63	120.46	-2.12425	4.12e-19	2.98e-18	down	GE02836	hypothetical protein	-	-	-
GE02404	8.58	30.05	-1.80832	4.12e-19	2.97e-18	down	GE02404	Putative alkyl/aryl-sulfatase YjcS (Precursor)	-	-	COG2015-Alkyl sulfatase and related hydrolases[Q]
GE03365	4.86	56.92	-3.54991	4.37e-19	3.14e-18	down	GE03365	hypothetical protein	-	-	-
GE04571	2.32	36.8	-3.98751	5.44e-19	3.9e-18	down	GE04571	Na(+)/H(+) antiporter subunit C	-	-	COG1006-Multisubunit Na+/H+ antiporter, MnhC subunit[P]
GE03373	10.67	39.24	-1.87876	5.48e-19	3.92e-18	down	GE03373	Putative aminotransferase MSMEG_6286/MSMEI_6121	-	-	COG1167-Transcriptional regulators containing a DNA-binding HTH domain and an aminotransferase domain (MocR family) and their eukaryotic orthologs[KE]
GE03395	25.75	58.98	-1.19565	5.56e-19	3.97e-18	down	GE03395	Membrane protein YdfJ	-	-	COG2409-Predicted drug exporters of the RND superfamily[R]
GE03333	20.76	55.78	-1.42594	5.75e-19	4.1e-18	down	GE03333	putative decaprenylphosphoryl-beta-D-ribose oxidase	-	-	COG0277-FAD/FMN-containing dehydrogenases[C]
GE01407	39.05	102.72	-1.39532	5.75e-19	4.1e-18	down	GE01407	Acyl-CoA thioesterase 2	-	K10805-ko01040 Biosynthesis of unsaturated fatty acids	COG1946-Acyl-CoA thioesterase[I]
GE04074	5.23	33.6	-2.68358	6.04e-19	4.29e-18	down	GE04074	Iron-dependent extradiol dioxygenase	-	-	-
GE03684	4.05	22.57	-2.47841	7.29e-19	5.16e-18	down	GE03684	Penicillin-binding protein A	GO:0005575,GO:0005622,GO:0005737,GO:0005829	K05364-ko00550 Peptidoglycan biosynthesis	COG0768-Cell division protein FtsI/penicillin-binding protein 2[M]
GE03708	8.07	30.68	-1.92666	8.01e-19	5.66e-18	down	GE03708	Chromosomal replication initiator protein DnaA	GO:0000166,GO:0003674,GO:0003676,GO:0003677,GO:0003688,GO:0003690,GO:0003824,GO:0005488,GO:0005524,GO:0005575,GO:0005618,GO:0005622,GO:0005737,GO:0005886,GO:0006139,GO:0006163,GO:0006164,GO:0006172,GO:0006259,GO:0006260,GO:0006261,GO:0006270,GO:0006725,GO:0006753,GO:0006793,GO:0006796,GO:0006807,GO:0008144,GO:0008150,GO:0008152,GO:0009058,GO:0009059,GO:0009117,GO:0009123,GO:0009124,GO:0009126,GO:…	K02313-ko02020 Two-component system;ko04112 Cell cycle - Caulobacter	COG0593-ATPase involved in DNA replication initiation[L]
GE04756	10.52	63.84	-2.60133	8.01e-19	5.65e-18	down	GE04756	UPF0234 protein RER_17110	GO:0005575,GO:0005622,GO:0005737,GO:0005829,GO:0005886,GO:0016020,GO:0071944	-	COG1666-Uncharacterized protein conserved in bacteria[S]
GE01691	138.37	357.94	-1.37119	8.72e-19	6.14e-18	down	GE01691	UPF0109 protein Mb2932c	GO:0008150,GO:0040007	-	COG1837-Predicted RNA-binding protein (contains KH domain)[R]
GE03897	2.9	52.61	-4.18121	1e-18	7.05e-18	down	GE03897	Limonene-1,2-epoxide hydrolase	-	K10533-ko00903 Limonene and pinene degradation	COG4308-Limonene-1,2-epoxide hydrolase[Q]
GE00002	20.87	91.97	-2.13973	1.09e-18	7.61e-18	down	GE00002	50S ribosomal protein L13	-	K02871-ko03010 Ribosome	COG0102-Ribosomal protein L13[J]
GE00754	28.45	129.97	-2.19168	1.12e-18	7.84e-18	down	GE00754	hypothetical protein	-	-	-
GE03698	55.45	120.69	-1.12205	1.16e-18	8.09e-18	down	GE03698	putative protein Rv0007	GO:0005575,GO:0005618,GO:0005886,GO:0005887,GO:0016020,GO:0016021,GO:0030312,GO:0031224,GO:0031226,GO:0071944	-	-
GE04706	16.14	55.26	-1.77559	1.94e-18	1.35e-17	down	GE04706	Cytochrome c biogenesis protein CcsA	-	-	COG0755-ABC-type transport system involved in cytochrome c biogenesis, permease component[O]
GE01006	42.25	90.27	-1.0953	2.79e-18	1.94e-17	down	GE01006	Succinate-semialdehyde dehydrogenase	-	K00135-ko00650 Butanoate metabolism;ko00250 Alanine, aspartate and glutamate metabolism;ko00310 Lysine degradation;ko00350 Tyrosine metabolism;ko00760 Nicotinate and nicotinamide metabolism	COG1012-NAD-dependent aldehyde dehydrogenases[C]
GE04569	19.93	78.43	-1.97646	2.84e-18	1.97e-17	down	GE04569	Na(+)/H(+) antiporter subunit E1	-	-	COG1863-Multisubunit Na+/H+ antiporter, MnhE subunit[P]
GE03841	22.9	91.61	-2.00016	3.18e-18	2.2e-17	down	GE03841	hypothetical protein	-	-	-
GE04044	0.75	13.28	-4.14622	3.32e-18	2.29e-17	down	GE04044	putative coniferyl aldehyde dehydrogenase	-	-	COG1012-NAD-dependent aldehyde dehydrogenases[C]
GE02623	3.16	23.1	-2.8699	3.49e-18	2.41e-17	down	GE02623	3-ketosteroid-9-alpha-monooxygenase oxygenase subunit	-	K15982-ko00984 Steroid degradation	COG4638-Phenylpropionate dioxygenase and related ring-hydroxylating dioxygenases, large terminal subunit[PR]
GE02532	18.92	53.94	-1.51144	3.55e-18	2.44e-17	down	GE02532	Citrate synthase 1	GO:0005575,GO:0005622,GO:0005737,GO:0005829,GO:0005886,GO:0016020,GO:0071944	K01647-ko01200 Carbon metabolism;ko01210 2-Oxocarboxylic acid metabolism;ko01230 Biosynthesis of amino acids;ko00020 Citrate cycle (TCA cycle);ko00630 Glyoxylate and dicarboxylate metabolism	COG0372-Citrate synthase[C]
GE00815	10.1	71.1	-2.81549	4.32e-18	2.97e-17	down	GE00815	Glutathione transferase FosA	-	-	-
GE03886	9.51	66.92	-2.81492	4.32e-18	2.97e-17	down	GE03886	Protein PhnB	-	-	COG2764-Uncharacterized protein conserved in bacteria[S]
GE03831	13.97	67.11	-2.2642	4.54e-18	3.11e-17	down	GE03831	HTH-type transcriptional repressor ComR	-	-	-
GE00184	97.73	251.77	-1.36523	5.02e-18	3.44e-17	down	GE00184	hypothetical protein	-	-	-
GE03084	12.99	52.6	-2.01766	5.51e-18	3.77e-17	down	GE03084	Type III pantothenate kinase	GO:0005575,GO:0005886,GO:0016020,GO:0071944	K03525-ko00770 Pantothenate and CoA biosynthesis	COG1521-Putative transcriptional regulator, homolog of Bvg accessory factor[K]
GE02087	37.96	78.65	-1.05097	6.56e-18	4.47e-17	down	GE02087	Putative thiamine pyrophosphate-containing protein YdaP	-	K00156-ko00620 Pyruvate metabolism	COG0028-Thiamine pyrophosphate-requiring enzymes [acetolactate synthase, pyruvate dehydrogenase (cytochrome), glyoxylate carboligase, phosphonopyruvate decarboxylase][EH]
GE03804	20.35	52.76	-1.37442	6.67e-18	4.54e-17	down	GE03804	hypothetical protein	-	-	COG5650-Predicted integral membrane protein[S]
GE04317	0.39	29.76	-6.25376	7.76e-18	5.27e-17	down	GE04317	UPF0312 protein plu2095	-	-	COG2353-Uncharacterized conserved protein[S]
GE00516	25.75	96.74	-1.90954	8.06e-18	5.47e-17	down	GE00516	putative protein MSMEG_4692/MSMEI_4575	GO:0005575,GO:0005886,GO:0016020,GO:0071944	-	-
GE02603	2.4	21.76	-3.18057	8.15e-18	5.52e-17	down	GE02603	Phospho-2-dehydro-3-deoxyheptonate aldolase, Phe-sensitive	-	K01626-ko01230 Biosynthesis of amino acids;ko00400 Phenylalanine, tyrosine and tryptophan biosynthesis;ko02024 Quorum sensing	COG0722-3-deoxy-D-arabino-heptulosonate 7-phosphate (DAHP) synthase[E]
GE01781	549.21	1111.42	-1.01697	9.27e-18	6.26e-17	down	GE01781	hypothetical protein	-	-	-
GE00761	13.6	49.79	-1.87225	9.77e-18	6.59e-17	down	GE00761	hypothetical protein	-	-	-
GE02805	19.14	65.92	-1.78413	9.89e-18	6.66e-17	down	GE02805	Phosphate import ATP-binding protein PstB	GO:0008150,GO:0040007,GO:0044110,GO:0044117,GO:0044403,GO:0044419,GO:0051704	K02036-ko02010 ABC transporters	COG1117-ABC-type phosphate transport system, ATPase component[P]
GE03802	148.55	317.91	-1.09767	1.11e-17	7.45e-17	down	GE03802	putative protein Mb0050	-	-	-
GE01460	98.91	231.13	-1.22452	1.18e-17	7.93e-17	down	GE01460	hypothetical protein	-	-	-
GE01303	28.74	79.46	-1.46717	1.26e-17	8.44e-17	down	GE01303	UPF0042 nucleotide-binding protein RER_30260	GO:0005575,GO:0005886,GO:0016020,GO:0071944	-	COG1660-Predicted P-loop-containing kinase[R]
GE02197	41.85	115.72	-1.46734	1.26e-17	8.44e-17	down	GE02197	hypothetical protein	-	-	-
GE03085	13.25	73.69	-2.47548	1.3e-17	8.69e-17	down	GE03085	Aspartate 1-decarboxylase alpha chain	GO:0003674,GO:0003824,GO:0004068,GO:0005575,GO:0005618,GO:0005622,GO:0005737,GO:0005829,GO:0006082,GO:0006520,GO:0006522,GO:0006523,GO:0006575,GO:0006766,GO:0006767,GO:0006807,GO:0008150,GO:0008152,GO:0008652,GO:0009058,GO:0009078,GO:0009079,GO:0009110,GO:0009987,GO:0015939,GO:0015940,GO:0016053,GO:0016829,GO:0016830,GO:0016831,GO:0019752,GO:0030312,GO:0032787,GO:0034641,GO:0042364,GO:0042398,GO:…	K01579-ko00410 beta-Alanine metabolism;ko00770 Pantothenate and CoA biosynthesis	COG0853-Aspartate 1-decarboxylase[H]
GE03846	13.76	74.83	-2.44314	1.41e-17	9.39e-17	down	GE03846	hypothetical protein	-	-	COG3795-Uncharacterized protein conserved in bacteria[S]
GE02060	101.86	209.4	-1.03967	1.45e-17	9.62e-17	down	GE02060	ECF RNA polymerase sigma factor SigE	GO:0000302,GO:0003674,GO:0003676,GO:0003677,GO:0005488,GO:0006355,GO:0006950,GO:0006979,GO:0008150,GO:0009266,GO:0009405,GO:0009408,GO:0009410,GO:0009605,GO:0009607,GO:0009628,GO:0009636,GO:0009889,GO:0010035,GO:0010468,GO:0010556,GO:0016987,GO:0019219,GO:0019222,GO:0031323,GO:0031326,GO:0040007,GO:0042221,GO:0042493,GO:0042542,GO:0043207,GO:0043254,GO:0044087,GO:0044110,GO:0044117,GO:0044119,GO:…	-	COG1595-DNA-directed RNA polymerase specialized sigma subunit, sigma24 homolog[K]
GE00729	16.66	53.69	-1.68827	1.49e-17	9.92e-17	down	GE00729	Heptaprenyl diphosphate synthase component 2	-	K13787-ko00900 Terpenoid backbone biosynthesis	COG0142-Geranylgeranyl pyrophosphate synthase[H]
GE01244	59.49	171.77	-1.52976	1.55e-17	1.03e-16	down	GE01244	hypothetical protein	-	-	-
GE00390	6.14	26.41	-2.10477	1.79e-17	1.19e-16	down	GE00390	Glutamate--tRNA ligase	GO:0005575,GO:0005886,GO:0008150,GO:0016020,GO:0040007,GO:0071944	K01885-ko00860 Porphyrin and chlorophyll metabolism;ko00970 Aminoacyl-tRNA biosynthesis	COG0008-Glutamyl- and glutaminyl-tRNA synthetases[J]
GE00099	24.41	75.56	-1.63015	1.81e-17	1.2e-16	down	GE00099	Succinate dehydrogenase iron-sulfur subunit	-	K00240-ko01200 Carbon metabolism;ko00020 Citrate cycle (TCA cycle);ko00650 Butanoate metabolism;ko00190 Oxidative phosphorylation;ko00720 Carbon fixation pathways in prokaryotes	COG0479-Succinate dehydrogenase/fumarate reductase, Fe-S protein subunit[C]
GE01329	50.01	168.97	-1.75648	1.82e-17	1.2e-16	down	GE01329	DNA-directed RNA polymerase subunit omega	GO:0005575,GO:0005618,GO:0008150,GO:0030312,GO:0040007,GO:0071944	K03060-ko00230 Purine metabolism;ko00240 Pyrimidine metabolism;ko03020 RNA polymerase	-
GE03069	25.24	112.46	-2.15563	1.91e-17	1.26e-16	down	GE03069	Thiocyanate hydrolase subunit beta	-	-	-
GE00915	6.95	31.36	-2.17384	1.93e-17	1.27e-16	down	GE00915	S-(hydroxymethyl)glutathione dehydrogenase	-	-	COG1063-Threonine dehydrogenase and related Zn-dependent dehydrogenases[ER]
GE00227	21.19	52.81	-1.31743	1.95e-17	1.28e-16	down	GE00227	DEAD-box ATP-dependent RNA helicase CshA	-	-	COG0513-Superfamily II DNA and RNA helicases[LKJ]
GE00753	8.06	48.9	-2.60098	2.4e-17	1.58e-16	down	GE00753	Cell division protein SepF	GO:0005575,GO:0005886,GO:0016020,GO:0071944	-	COG1799-Uncharacterized protein conserved in bacteria[S]
GE01245	61.89	124.56	-1.00906	2.64e-17	1.73e-16	down	GE01245	putative protein Mb1524	GO:0005575,GO:0005576,GO:0005618,GO:0005886,GO:0016020,GO:0030312,GO:0071944	-	COG0330-Membrane protease subunits, stomatin/prohibitin homologs[O]
GE02108	22.37	86.32	-1.94813	2.73e-17	1.78e-16	down	GE02108	hypothetical protein	-	-	-
GE03565	22.94	67.55	-1.55809	2.81e-17	1.84e-16	down	GE03565	F420-dependent glucose-6-phosphate dehydrogenase	-	-	COG2141-Coenzyme F420-dependent N5,N10-methylene tetrahydromethanopterin reductase and related flavin-dependent oxidoreductases[C]
GE04888	11.34	165.31	-3.86568	3.53e-17	2.3e-16	down	GE04888	50S ribosomal protein L36	-	K02919-ko03010 Ribosome	COG0257-Ribosomal protein L36[J]
GE04296	28.74	108.57	-1.91749	3.67e-17	2.39e-16	down	GE04296	Putative heat shock protein HspR	-	-	-
GE04889	22.2	98.87	-2.15497	4.93e-17	3.21e-16	down	GE04889	30S ribosomal protein S13	GO:0003674,GO:0003735,GO:0005198,GO:0005575,GO:0005622,GO:0005737,GO:0005829,GO:0005840,GO:0005886,GO:0006412,GO:0006518,GO:0006807,GO:0008150,GO:0008152,GO:0009058,GO:0009059,GO:0009987,GO:0010467,GO:0015935,GO:0016020,GO:0019538,GO:0022613,GO:0032991,GO:0034641,GO:0034645,GO:0042254,GO:0043043,GO:0043170,GO:0043226,GO:0043228,GO:0043229,GO:0043232,GO:0043603,GO:0043604,GO:0044085,GO:0044237,GO:…	K02952-ko03010 Ribosome	COG0099-Ribosomal protein S13[J]
GE04508	125.58	281.56	-1.16484	5.64e-17	3.66e-16	down	GE04508	hypothetical protein	-	-	-
GE03717	16.28	49.92	-1.61652	6.45e-17	4.18e-16	down	GE03717	putative chromosome-partitioning protein ParB	GO:0005575,GO:0005576,GO:0005622,GO:0005694,GO:0005886,GO:0008150,GO:0016020,GO:0040007,GO:0043226,GO:0043228,GO:0043229,GO:0043232,GO:0060187,GO:0071944	-	COG1475-Predicted transcriptional regulators[K]
GE03569	0.34	24.54	-6.17346	6.77e-17	4.37e-16	down	GE03569	Superoxide dismutase	-	K04564-ko04013 MAPK signaling pathway - fly;ko04068 FoxO signaling pathway;ko04146 Peroxisome;ko04211 Longevity regulating pathway - mammal;ko04212 Longevity regulating pathway - worm;ko04213 Longevity regulating pathway - multiple species;ko05016 Huntington's disease	COG0605-Superoxide dismutase[P]
GE03895	0.36	12.96	-5.16993	7.93e-17	5.11e-16	down	GE03895	Pulcherriminic acid synthase	-	-	COG2124-Cytochrome P450[Q]
GE00698	108.03	245.67	-1.18529	8.18e-17	5.26e-16	down	GE00698	putative cytochrome c oxidase polypeptide 4	-	-	-
GE03848	37.29	76.79	-1.04213	8.99e-17	5.78e-16	down	GE03848	hypothetical protein	-	-	-
GE02349	18.91	104.28	-2.46324	9.16e-17	5.88e-16	down	GE02349	hypothetical protein	-	-	COG2331-Uncharacterized protein conserved in bacteria[S]
GE04817	63.33	148.86	-1.233	9.6e-17	6.15e-16	down	GE04817	Putative mycofactocin biosynthesis transcriptional regulator MftR	GO:0000976,GO:0001067,GO:0003674,GO:0003676,GO:0003677,GO:0003690,GO:0003700,GO:0005488,GO:0005575,GO:0005622,GO:0005737,GO:0005829,GO:0006355,GO:0008150,GO:0009889,GO:0010468,GO:0010556,GO:0019219,GO:0019222,GO:0031323,GO:0031326,GO:0043565,GO:0050789,GO:0050794,GO:0051171,GO:0051252,GO:0060255,GO:0065007,GO:0080090,GO:0097159,GO:0140110,GO:1901363,GO:1903506,GO:1990837,GO:2000112,GO:2001141	-	COG1309-Transcriptional regulator[K]
GE02351	3.44	43.58	-3.66319	1.08e-16	6.9e-16	down	GE02351	Large-conductance mechanosensitive channel	GO:0003674,GO:0005215,GO:0005488,GO:0005515,GO:0005575,GO:0005886,GO:0005887,GO:0006810,GO:0006811,GO:0006884,GO:0008150,GO:0008361,GO:0008381,GO:0009987,GO:0009992,GO:0015267,GO:0016020,GO:0016021,GO:0016043,GO:0019725,GO:0022803,GO:0022836,GO:0022857,GO:0030104,GO:0031224,GO:0031226,GO:0032535,GO:0042592,GO:0042802,GO:0048878,GO:0051179,GO:0051234,GO:0055082,GO:0055085,GO:0065007,GO:0065008,GO:…	-	COG1970-Large-conductance mechanosensitive channel[M]
GE04799	24.72	102.45	-2.05117	1.08e-16	6.91e-16	down	GE04799	30S ribosomal protein S12	GO:0003674,GO:0003735,GO:0005198,GO:0005575,GO:0005622,GO:0005737,GO:0005840,GO:0006412,GO:0006518,GO:0006807,GO:0008150,GO:0008152,GO:0009058,GO:0009059,GO:0009987,GO:0010467,GO:0019538,GO:0032991,GO:0034641,GO:0034645,GO:0040007,GO:0043043,GO:0043170,GO:0043226,GO:0043228,GO:0043229,GO:0043232,GO:0043603,GO:0043604,GO:0044237,GO:0044238,GO:0044249,GO:0044260,GO:0044267,GO:0044271,GO:0071704,GO:…	K02950-ko03010 Ribosome	COG0048-Ribosomal protein S12[J]
GE00940	34.64	93.37	-1.43052	1.23e-16	7.85e-16	down	GE00940	hypothetical protein	-	-	-
GE02590	53.17	236.78	-2.15486	1.28e-16	8.14e-16	down	GE02590	hypothetical protein	-	-	-
GE04879	161.12	329.85	-1.03367	1.31e-16	8.33e-16	down	GE04879	50S ribosomal protein L18	GO:0003674,GO:0003676,GO:0003723,GO:0005488,GO:0005575,GO:0005622,GO:0005737,GO:0005829,GO:0005840,GO:0008097,GO:0008150,GO:0015934,GO:0019843,GO:0022625,GO:0022626,GO:0032991,GO:0040007,GO:0043226,GO:0043228,GO:0043229,GO:0043232,GO:0044391,GO:0097159,GO:1901363,GO:1990904	K02881-ko03010 Ribosome	COG0256-Ribosomal protein L18[J]
GE04664	25.97	77.95	-1.5857	1.35e-16	8.61e-16	down	GE04664	2,3-bisphosphoglycerate-dependent phosphoglycerate mutase	GO:0003674,GO:0003824,GO:0004619,GO:0005488,GO:0005515,GO:0005575,GO:0005622,GO:0005737,GO:0005829,GO:0005886,GO:0005975,GO:0005996,GO:0006006,GO:0006082,GO:0006090,GO:0006091,GO:0006094,GO:0006096,GO:0006109,GO:0006139,GO:0006140,GO:0006163,GO:0006164,GO:0006165,GO:0006725,GO:0006753,GO:0006754,GO:0006757,GO:0006793,GO:0006796,GO:0006807,GO:0008150,GO:0008152,GO:0009056,GO:0009058,GO:0009117,GO:…	K01834-ko01200 Carbon metabolism;ko01230 Biosynthesis of amino acids;ko00010 Glycolysis / Gluconeogenesis;ko00680 Methane metabolism;ko00260 Glycine, serine and threonine metabolism;ko04922 Glucagon signaling pathway;ko05230 Central carbon metabolism in cancer	COG0588-Phosphoglycerate mutase 1[G]
GE02384	68.22	142.36	-1.06128	1.42e-16	9.01e-16	down	GE02384	hypothetical protein	-	-	-
GE02094	135.55	390.53	-1.52661	1.52e-16	9.66e-16	down	GE02094	hypothetical protein	-	-	-
GE02990	14.27	51.63	-1.85522	1.6e-16	1.01e-15	down	GE02990	putative oxidoreductase Rv0769	-	-	COG0623-Enoyl-[acyl-carrier-protein] reductase (NADH)[I]
GE04103	7.49	31.56	-2.07506	1.84e-16	1.16e-15	down	GE04103	hypothetical protein	-	-	COG0183-Acetyl-CoA acetyltransferase[I]
GE00263	12.03	38.65	-1.68383	1.91e-16	1.2e-15	down	GE00263	putative protein slr1919	-	-	COG0661-Predicted unusual protein kinase[R]
GE00615	13.47	40.79	-1.59847	2.01e-16	1.26e-15	down	GE00615	Glycine--tRNA ligase	GO:0003674,GO:0003824,GO:0004812,GO:0004820,GO:0005488,GO:0005515,GO:0005575,GO:0005622,GO:0005737,GO:0006082,GO:0006139,GO:0006399,GO:0006412,GO:0006418,GO:0006426,GO:0006518,GO:0006520,GO:0006725,GO:0006807,GO:0008150,GO:0008152,GO:0009058,GO:0009059,GO:0009987,GO:0010467,GO:0016070,GO:0016874,GO:0016875,GO:0019538,GO:0019752,GO:0034641,GO:0034645,GO:0034660,GO:0043038,GO:0043039,GO:0043043,GO:…	K01880-ko00970 Aminoacyl-tRNA biosynthesis	COG0423-Glycyl-tRNA synthetase (class II)[J]
GE01170	24.03	68.95	-1.52071	2.19e-16	1.37e-15	down	GE01170	Sec-independent protein translocase protein TatC	GO:0003674,GO:0005215,GO:0005575,GO:0005622,GO:0005737,GO:0005829,GO:0005886,GO:0006810,GO:0006886,GO:0008104,GO:0008150,GO:0008320,GO:0009977,GO:0015031,GO:0015291,GO:0015399,GO:0015450,GO:0015833,GO:0016020,GO:0022804,GO:0022857,GO:0022884,GO:0032991,GO:0033036,GO:0033281,GO:0034613,GO:0040007,GO:0042886,GO:0042887,GO:0043953,GO:0045184,GO:0046907,GO:0051179,GO:0051234,GO:0051641,GO:0051649,GO:…	K03118-ko03060 Protein export;ko03070 Bacterial secretion system	COG0805-Sec-independent protein secretion pathway component TatC[U]
GE02606	3.15	30.38	-3.2697	2.19e-16	1.37e-15	down	GE02606	NADH dehydrogenase	-	-	COG0778-Nitroreductase[C]
rrna6	0.62	6.41	-3.36998	2.65e-16	1.65e-15	down	rrna6	23S ribosomal RNA	-	-	-
GE04547	37.5	97.54	-1.3791	2.89e-16	1.8e-15	down	GE04547	hypothetical protein	-	-	-
GE01906	44.35	144.97	-1.70875	3.03e-16	1.89e-15	down	GE01906	hypothetical protein	-	-	-
GE02555	5.65	31.16	-2.46337	3.88e-16	2.41e-15	down	GE02555	Homoserine O-succinyltransferase	-	K00651-ko01230 Biosynthesis of amino acids;ko00920 Sulfur metabolism;ko00270 Cysteine and methionine metabolism	COG1897-Homoserine trans-succinylase[E]
GE03746	19.29	57.92	-1.58621	4.25e-16	2.64e-15	down	GE03746	Carboxylesterase NlhH	-	-	COG0657-Esterase/lipase[I]
GE00917	72.55	204.93	-1.49808	4.85e-16	3e-15	down	GE00917	hypothetical protein	-	-	-
GE01512	94.36	198.34	-1.07173	5.23e-16	3.22e-15	down	GE01512	tRNA-2-methylthio-N(6)-dimethylallyladenosine synthase	-	-	-
GE00051	31.76	75.66	-1.25232	6.83e-16	4.2e-15	down	GE00051	putative oxidoreductase MSMEG_1603/MSMEI_1564	GO:0005575,GO:0005622,GO:0005737,GO:0005886,GO:0006139,GO:0006163,GO:0006164,GO:0006183,GO:0006725,GO:0006753,GO:0006793,GO:0006796,GO:0006807,GO:0008150,GO:0008152,GO:0009058,GO:0009116,GO:0009117,GO:0009119,GO:0009141,GO:0009142,GO:0009144,GO:0009145,GO:0009150,GO:0009152,GO:0009163,GO:0009165,GO:0009199,GO:0009201,GO:0009205,GO:0009206,GO:0009259,GO:0009260,GO:0009987,GO:0016020,GO:0018130,GO:…	K00088-ko00230 Purine metabolism;ko00983 Drug metabolism - other enzymes	-
GE01833	0.32	5.09	-3.99152	7.23e-16	4.44e-15	down	GE01833	putative ATP-dependent helicase MPN_020	-	-	COG0553-Superfamily II DNA/RNA helicases, SNF2 family[KL]
GE01398	9.9	35.95	-1.86049	7.38e-16	4.52e-15	down	GE01398	Protein translocase subunit SecF	GO:0005575,GO:0005618,GO:0005886,GO:0005887,GO:0006810,GO:0008104,GO:0008150,GO:0015031,GO:0015833,GO:0016020,GO:0016021,GO:0030312,GO:0031224,GO:0031226,GO:0033036,GO:0042886,GO:0045184,GO:0051179,GO:0051234,GO:0071702,GO:0071705,GO:0071944	K03074-ko03060 Protein export;ko03070 Bacterial secretion system	COG0341-Preprotein translocase subunit SecF[U]
GE01206	44.25	93.57	-1.08037	7.69e-16	4.71e-15	down	GE01206	L-cysteine:1D-myo-inositol 2-amino-2-deoxy-alpha-D-glucopyranoside ligase	GO:0000166,GO:0003674,GO:0003824,GO:0004812,GO:0004817,GO:0005488,GO:0005524,GO:0005575,GO:0005622,GO:0005737,GO:0005829,GO:0005886,GO:0006082,GO:0006139,GO:0006399,GO:0006412,GO:0006418,GO:0006423,GO:0006518,GO:0006520,GO:0006725,GO:0006790,GO:0006807,GO:0008144,GO:0008150,GO:0008152,GO:0009058,GO:0009059,GO:0009987,GO:0010125,GO:0010126,GO:0010467,GO:0016020,GO:0016070,GO:0016137,GO:0016138,GO:…	-	COG0215-Cysteinyl-tRNA synthetase[J]
GE04238	21.39	90.37	-2.07891	7.79e-16	4.75e-15	down	GE04238	putative protein Rv2742A	-	-	-
GE00102	20.76	87.7	-2.07877	7.79e-16	4.75e-15	down	GE00102	hypothetical protein	-	K00241-ko01200 Carbon metabolism;ko00020 Citrate cycle (TCA cycle);ko00650 Butanoate metabolism;ko00190 Oxidative phosphorylation;ko00720 Carbon fixation pathways in prokaryotes	COG2009-Succinate dehydrogenase/fumarate reductase, cytochrome b subunit[C]
GE04529	4.77	20.17	-2.08015	7.79e-16	4.75e-15	down	GE04529	putative cytochrome c oxidase subunit 1-alpha	GO:0006091,GO:0006810,GO:0006811,GO:0006812,GO:0008150,GO:0008152,GO:0009060,GO:0009987,GO:0015672,GO:0015980,GO:0015988,GO:0015990,GO:0022900,GO:0022904,GO:0034220,GO:0044237,GO:0045333,GO:0051179,GO:0051234,GO:0055085,GO:0055114,GO:0098655,GO:0098660,GO:0098662,GO:1902600	K02274-ko00190 Oxidative phosphorylation	COG0843-Heme/copper-type cytochrome/quinol oxidases, subunit 1[C]
GE03320	20.89	69.54	-1.73503	7.88e-16	4.79e-15	down	GE03320	putative HTH-type transcriptional regulator Mb0044c	-	-	COG1802-Transcriptional regulators[K]
GE00821	4.65	26.53	-2.51232	9.03e-16	5.47e-15	down	GE00821	Biotin synthase	GO:0005575,GO:0005618,GO:0005886,GO:0016020,GO:0030312,GO:0071944	K01012-ko00780 Biotin metabolism	COG0502-Biotin synthase and related enzymes[H]
GE02594	4.1	29.4	-2.84212	9.14e-16	5.53e-15	down	GE02594	RNA polymerase sigma factor SigF	-	-	COG1191-DNA-directed RNA polymerase specialized sigma subunit[K]
GE02106	69.45	338.26	-2.28409	1.35e-15	8.13e-15	down	GE02106	hypothetical protein	-	-	-
GE01913	19.41	52.1	-1.42448	1.37e-15	8.25e-15	down	GE01913	putative multidrug-efflux transporter Mb1288c	GO:0003674,GO:0005215,GO:0006810,GO:0008150,GO:0015562,GO:0022857,GO:0042221,GO:0046677,GO:0050896,GO:0051179,GO:0051234,GO:0055085	-	-
GE02536	25.03	64.04	-1.35532	1.5e-15	8.98e-15	down	GE02536	Putative citrate synthase 2	GO:0005575,GO:0005622,GO:0005737,GO:0005829	K01647-ko01200 Carbon metabolism;ko01210 2-Oxocarboxylic acid metabolism;ko01230 Biosynthesis of amino acids;ko00020 Citrate cycle (TCA cycle);ko00630 Glyoxylate and dicarboxylate metabolism	COG0372-Citrate synthase[C]
GE03852	2.13	15.09	-2.82467	1.58e-15	9.44e-15	down	GE03852	Baeyer-Villiger monooxygenase	-	-	COG2072-Predicted flavoprotein involved in K+ transport[P]
GE01600	2.38	16.93	-2.83055	1.58e-15	9.44e-15	down	GE01600	Putative cytochrome P450 136	-	-	COG2124-Cytochrome P450[Q]
GE04997	20.24	83.38	-2.04249	1.86e-15	1.11e-14	down	GE04997	hypothetical protein	-	-	-
GE01697	30.38	83.09	-1.45155	1.94e-15	1.16e-14	down	GE01697	putative protein ML1173	GO:0003674,GO:0003824,GO:0004518,GO:0004519,GO:0004521,GO:0004540,GO:0005575,GO:0005886,GO:0006139,GO:0006396,GO:0006399,GO:0006725,GO:0006807,GO:0008033,GO:0008150,GO:0008152,GO:0009987,GO:0010467,GO:0016020,GO:0016070,GO:0016787,GO:0016788,GO:0016891,GO:0016893,GO:0031123,GO:0034414,GO:0034470,GO:0034641,GO:0034660,GO:0040007,GO:0042779,GO:0042780,GO:0042781,GO:0043170,GO:0043628,GO:0044237,GO:…	-	COG1234-Metal-dependent hydrolases of the beta-lactamase superfamily III[R]
GE01617	19.38	55.97	-1.53009	1.98e-15	1.18e-14	down	GE01617	hypothetical protein	-	-	COG2267-Lysophospholipase[I]
GE01046	32.16	67	-1.05889	2.36e-15	1.4e-14	down	GE01046	CTP synthase	GO:0005575,GO:0005886,GO:0008150,GO:0016020,GO:0040007,GO:0071944	K01937-ko00240 Pyrimidine metabolism	COG0504-CTP synthase (UTP-ammonia lyase)[F]
GE03412	0.96	22.29	-4.53722	2.44e-15	1.45e-14	down	GE03412	Phosphoglycolate phosphatase	-	-	COG0637-Predicted phosphatase/phosphohexomutase[R]
GE00635	19.47	77.94	-2.00111	2.66e-15	1.57e-14	down	GE00635	Putative peroxiredoxin Mb2262c	GO:0003674,GO:0003824,GO:0004601,GO:0005575,GO:0005622,GO:0005737,GO:0005829,GO:0006950,GO:0008150,GO:0008152,GO:0009605,GO:0009607,GO:0009636,GO:0009987,GO:0016209,GO:0016491,GO:0016684,GO:0030682,GO:0042221,GO:0043207,GO:0044403,GO:0044419,GO:0050896,GO:0051409,GO:0051701,GO:0051704,GO:0051707,GO:0051716,GO:0051920,GO:0052173,GO:0052200,GO:0052572,GO:0055114,GO:0070887,GO:0075136,GO:0097237,GO:…	K03386-ko04214 Apoptosis - fly	COG1225-Peroxiredoxin[O]
GE01205	21.08	54.45	-1.36906	2.71e-15	1.6e-14	down	GE01205	ATP-dependent zinc metalloprotease FtsH 2	-	-	COG0464-ATPases of the AAA+ class[O]
GE04069	3.86	25.95	-2.74906	3.29e-15	1.93e-14	down	GE04069	putative HTH-type transcriptional regulator YagI	-	-	COG1414-Transcriptional regulator[K]
GE03815	10.1	39.01	-1.94949	3.46e-15	2.03e-14	down	GE03815	hypothetical protein	-	-	-
GE04568	8.26	74.98	-3.18229	3.83e-15	2.24e-14	down	GE04568	putative K(+)/H(+) antiporter subunit F	-	-	COG2212-Multisubunit Na+/H+ antiporter, MnhF subunit[P]
GE00960	4.95	44.99	-3.1841	3.83e-15	2.24e-14	down	GE00960	hypothetical protein	-	-	-
GE03837	6.19	24.59	-1.99006	4.15e-15	2.43e-14	down	GE03837	Glyceraldehyde-3-phosphate dehydrogenase-like protein	-	K00134-ko01200 Carbon metabolism;ko01230 Biosynthesis of amino acids;ko00010 Glycolysis / Gluconeogenesis;ko00710 Carbon fixation in photosynthetic organisms;ko04066 HIF-1 signaling pathway;ko05010 Alzheimer's disease	COG0057-Glyceraldehyde-3-phosphate dehydrogenase/erythrose-4-phosphate dehydrogenase[G]
GE03190	19.25	51.96	-1.43254	4.72e-15	2.76e-14	down	GE03190	Na(+)/H(+) antiporter NhaA 2	-	-	COG3004-Na+/H+ antiporter[P]
GE00479	25.3	130.45	-2.36629	5.11e-15	2.98e-14	down	GE00479	hypothetical protein	-	-	-
GE01713	28.36	57.21	-1.01241	5.55e-15	3.23e-14	down	GE01713	1,4-alpha-glucan branching enzyme GlgB	GO:0000271,GO:0003674,GO:0003824,GO:0003844,GO:0005575,GO:0005886,GO:0005975,GO:0005976,GO:0005977,GO:0005978,GO:0006073,GO:0006091,GO:0006112,GO:0008150,GO:0008152,GO:0009058,GO:0009059,GO:0009250,GO:0009987,GO:0015980,GO:0016020,GO:0016051,GO:0016740,GO:0016757,GO:0016758,GO:0033692,GO:0034637,GO:0034645,GO:0040007,GO:0043170,GO:0044042,GO:0044237,GO:0044238,GO:0044249,GO:0044260,GO:0044262,GO:…	K00700-ko00500 Starch and sucrose metabolism	COG0296-1,4-alpha-glucan branching enzyme[G]
GE00233	43.32	91.81	-1.08362	6.15e-15	3.56e-14	down	GE00233	Sulfur carrier protein CysO sulfurtransferase	GO:0000096,GO:0000097,GO:0003674,GO:0003824,GO:0005575,GO:0005618,GO:0005622,GO:0005737,GO:0005829,GO:0006082,GO:0006520,GO:0006534,GO:0006535,GO:0006563,GO:0006790,GO:0006807,GO:0008146,GO:0008150,GO:0008152,GO:0008652,GO:0009058,GO:0009069,GO:0009070,GO:0009605,GO:0009607,GO:0009987,GO:0016053,GO:0016740,GO:0016772,GO:0016779,GO:0016782,GO:0019344,GO:0019752,GO:0030312,GO:0030682,GO:0042783,GO:…	-	COG0476-Dinucleotide-utilizing enzymes involved in molybdopterin and thiamine biosynthesis family 2[H]
GE01587	61.58	146.91	-1.2544	6.24e-15	3.61e-14	down	GE01587	NADH-quinone oxidoreductase subunit I	GO:0005575,GO:0005618,GO:0005622,GO:0005737,GO:0005829,GO:0030312,GO:0071944	K00338-ko00190 Oxidative phosphorylation	COG1143-Formate hydrogenlyase subunit 6/NADH:ubiquinone oxidoreductase 23 kD subunit (chain I)[C]
GE00358	33.63	85.97	-1.35408	7.27e-15	4.19e-14	down	GE00358	Electron transfer flavoprotein subunit beta	GO:0003674,GO:0003824,GO:0005575,GO:0005618,GO:0005622,GO:0005737,GO:0005829,GO:0005886,GO:0006091,GO:0008150,GO:0008152,GO:0009055,GO:0009987,GO:0016020,GO:0016491,GO:0022900,GO:0030312,GO:0040007,GO:0044237,GO:0055114,GO:0071944	-	COG2086-Electron transfer flavoprotein, beta subunit[C]
trna3	182.95	567.51	-1.6332	8.04e-15	4.63e-14	down	trna3	tRNA-Leu	-	-	-
GE03388	6.07	45.5	-2.9061	9.03e-15	5.19e-14	down	GE03388	Putative pyridoxine/pyridoxamine 5'-phosphate oxidase	-	-	-
GE01734	3.78	39.21	-3.37476	1.02e-14	5.87e-14	down	GE01734	hypothetical protein	-	-	-
GE01082	23.49	148.68	-2.66209	1.13e-14	6.45e-14	down	GE01082	hypothetical protein	-	-	-
GE01694	6.79	53.27	-2.97184	1.22e-14	6.99e-14	down	GE01694	putative protein Mb1377c	GO:0005575,GO:0005886,GO:0005887,GO:0008150,GO:0016020,GO:0016021,GO:0031224,GO:0031226,GO:0040007,GO:0071944	-	-
GE01109	7.57	22.13	-1.54764	1.24e-14	7.05e-14	down	GE01109	UvrABC system protein A	-	-	COG0178-Excinuclease ATPase subunit[L]
GE00386	10.96	32.46	-1.56642	1.28e-14	7.32e-14	down	GE00386	D-3-phosphoglycerate dehydrogenase	GO:0003674,GO:0003824,GO:0004617,GO:0005575,GO:0005618,GO:0005886,GO:0006082,GO:0006520,GO:0006563,GO:0006564,GO:0006807,GO:0008150,GO:0008152,GO:0008652,GO:0009058,GO:0009069,GO:0009070,GO:0009987,GO:0016020,GO:0016053,GO:0016491,GO:0016614,GO:0016616,GO:0019752,GO:0030312,GO:0040007,GO:0043436,GO:0044237,GO:0044238,GO:0044249,GO:0044281,GO:0044283,GO:0046394,GO:0055114,GO:0071704,GO:0071944,GO:…	K00058-ko01200 Carbon metabolism;ko01230 Biosynthesis of amino acids;ko00680 Methane metabolism;ko00260 Glycine, serine and threonine metabolism	COG0111-Phosphoglycerate dehydrogenase and related dehydrogenases[HE]
GE04181	11.82	49.04	-2.05273	1.3e-14	7.4e-14	down	GE04181	hypothetical protein	-	-	-
GE03761	14.61	75.76	-2.37448	1.31e-14	7.47e-14	down	GE03761	hypothetical protein	-	-	-
GE01147	7.07	18.27	-1.36969	1.54e-14	8.72e-14	down	GE01147	Aerobic cobaltochelatase subunit CobN	-	K02230-ko00860 Porphyrin and chlorophyll metabolism	COG1429-Cobalamin biosynthesis protein CobN and related Mg-chelatases[H]
GE03934	6.28	25.89	-2.04356	2.05e-14	1.16e-13	down	GE03934	Transcriptional regulator LytR	-	-	COG1316-Transcriptional regulator[K]
GE00759	18.17	68.96	-1.9242	2.13e-14	1.2e-13	down	GE00759	hypothetical protein	-	-	-
GE02860	24.79	51.39	-1.05173	2.98e-14	1.68e-13	down	GE02860	Protease 2	-	-	COG1770-Protease II[E]
GE00800	8.25	24.27	-1.55671	3.08e-14	1.73e-13	down	GE00800	O-acetyltransferase OatA	-	-	COG1835-Predicted acyltransferases[I]
GE01007	50.62	118.61	-1.22845	4.46e-14	2.49e-13	down	GE01007	hypothetical protein	-	-	-
GE01235	13.33	43.16	-1.69502	4.49e-14	2.5e-13	down	GE01235	putative GTPase Mb1533	-	-	COG1703-Putative periplasmic protein kinase ArgK and related GTPases of G3E family[E]
GE04185	33.5	75.11	-1.16484	4.74e-14	2.64e-13	down	GE04185	putative acyl-CoA dehydrogenase fadE25	GO:0005575,GO:0005618,GO:0005622,GO:0005737,GO:0005829,GO:0005886,GO:0016020,GO:0030312,GO:0071944	-	COG1960-Acyl-CoA dehydrogenases[I]
GE00656	7.98	134.23	-4.07217	4.89e-14	2.72e-13	down	GE00656	hypothetical protein	-	-	-
GE04236	25.3	61.49	-1.28121	5.07e-14	2.81e-13	down	GE04236	hypothetical protein	-	-	-
GE02030	9.18	56.32	-2.61708	5.48e-14	3.04e-13	down	GE02030	hypothetical protein	-	-	-
GE01628	62.3	127.84	-1.03704	6.59e-14	3.63e-13	down	GE01628	Methionine aminopeptidase	GO:0000096,GO:0003674,GO:0003824,GO:0004177,GO:0005488,GO:0005506,GO:0006082,GO:0006464,GO:0006508,GO:0006520,GO:0006555,GO:0006790,GO:0006807,GO:0008150,GO:0008152,GO:0008233,GO:0008235,GO:0008237,GO:0008238,GO:0009066,GO:0009987,GO:0010467,GO:0016151,GO:0016485,GO:0016787,GO:0019538,GO:0019752,GO:0030145,GO:0035551,GO:0036211,GO:0043167,GO:0043169,GO:0043170,GO:0043412,GO:0043436,GO:0044237,GO:…	-	COG0024-Methionine aminopeptidase[J]
GE04736	2	21.82	-3.44758	6.91e-14	3.81e-13	down	GE04736	High-affinity branched-chain amino acid transport ATP-binding protein LivF	-	K01996-ko02010 ABC transporters;ko02024 Quorum sensing	COG0410-ABC-type branched-chain amino acid transport systems, ATPase component[E]
GE04450	69.14	170.76	-1.30438	8.2e-14	4.51e-13	down	GE04450	hypothetical protein	-	-	COG5649-Uncharacterized conserved protein[S]
GE01059	4.75	24.3	-2.35496	9.17e-14	5.03e-13	down	GE01059	Lactonase drp35	-	-	COG3386-Gluconolactonase[G]
GE04815	41.84	89.92	-1.10376	9.32e-14	5.1e-13	down	GE04815	3-ketosteroid-9-alpha-hydroxylase reductase subunit	-	K15983-ko00984 Steroid degradation	COG1018-Flavodoxin reductases (ferredoxin-NADPH reductases) family 1[C]
GE00055	32.02	69.93	-1.12694	9.54e-14	5.22e-13	down	GE00055	hypothetical protein	-	-	COG1983-Putative stress-responsive transcriptional regulator[KT]
GE04582	11.51	56.27	-2.28948	9.84e-14	5.38e-13	down	GE04582	hypothetical protein	-	-	-
GE02939	28.43	66.75	-1.23135	1.37e-13	7.45e-13	down	GE02939	Acyl-CoA dehydrogenase, short-chain specific	-	-	COG1960-Acyl-CoA dehydrogenases[I]
GE00220	39.72	142.13	-1.83927	1.42e-13	7.75e-13	down	GE00220	Transcriptional regulator WhiB1	GO:0000302,GO:0003674,GO:0003676,GO:0003677,GO:0003824,GO:0005488,GO:0006355,GO:0006950,GO:0006979,GO:0008150,GO:0008152,GO:0009889,GO:0009890,GO:0009892,GO:0010035,GO:0010468,GO:0010556,GO:0010558,GO:0010605,GO:0010629,GO:0015035,GO:0015036,GO:0016491,GO:0016651,GO:0016667,GO:0016668,GO:0019219,GO:0019222,GO:0031323,GO:0031324,GO:0031326,GO:0031327,GO:0042221,GO:0042493,GO:0045892,GO:0045934,GO:…	-	-
GE01666	45.83	106.06	-1.21052	1.46e-13	7.93e-13	down	GE01666	Uridylate kinase	GO:0000287,GO:0003674,GO:0003824,GO:0005488,GO:0005575,GO:0005886,GO:0006139,GO:0006213,GO:0006220,GO:0006221,GO:0006225,GO:0006725,GO:0006753,GO:0006793,GO:0006796,GO:0006807,GO:0008150,GO:0008152,GO:0009041,GO:0009058,GO:0009116,GO:0009117,GO:0009119,GO:0009123,GO:0009132,GO:0009133,GO:0009138,GO:0009139,GO:0009163,GO:0009165,GO:0009185,GO:0009188,GO:0009193,GO:0009194,GO:0009218,GO:0009220,GO:…	K09903-ko00240 Pyrimidine metabolism	COG0528-Uridylate kinase[F]
GE00982	4.76	18.11	-1.92775	1.51e-13	8.15e-13	down	GE00982	Vitamin B12 transport ATP-binding protein BacA	GO:0005575,GO:0005576,GO:0005886,GO:0005887,GO:0008150,GO:0009605,GO:0009607,GO:0016020,GO:0016021,GO:0031224,GO:0031226,GO:0043207,GO:0044403,GO:0044419,GO:0050896,GO:0051701,GO:0051704,GO:0051707,GO:0052173,GO:0052200,GO:0052572,GO:0071944,GO:0075136	K02471-ko02010 ABC transporters	COG4178-ABC-type uncharacterized transport system, permease and ATPase components[R]
GE01084	5.88	26.84	-2.1905	1.64e-13	8.86e-13	down	GE01084	Putative quercetin 2,3-dioxygenase PA2418	-	-	COG1741-Pirin-related protein[R]
GE01523	14.68	45.18	-1.62183	1.71e-13	9.2e-13	down	GE01523	Pyrimidine monooxygenase RutA	-	-	COG2141-Coenzyme F420-dependent N5,N10-methylene tetrahydromethanopterin reductase and related flavin-dependent oxidoreductases[C]
GE03106	22.82	63.38	-1.47373	1.8e-13	9.66e-13	down	GE03106	putative enoyl-CoA hydratase echA8	GO:0005575,GO:0005622,GO:0005737,GO:0005739,GO:0005777,GO:0042579,GO:0043226,GO:0043227,GO:0043229,GO:0043231	K01692-ko01212 Fatty acid metabolism;ko00640 Propanoate metabolism;ko00650 Butanoate metabolism;ko00071 Fatty acid degradation;ko00280 Valine, leucine and isoleucine degradation;ko00310 Lysine degradation;ko00360 Phenylalanine metabolism;ko00380 Tryptophan metabolism;ko00410 beta-Alanine metabolism;ko00903 Limonene and pinene degradation;ko00281 Geraniol degradation;ko00362 Benzoate degradation;k…	COG1024-Enoyl-CoA hydratase/carnithine racemase[I]
GE03651	9.09	21.53	-1.244	1.95e-13	1.05e-12	down	GE03651	Phosphatidylglycerol lysyltransferase	GO:0005575,GO:0005618,GO:0005622,GO:0005737,GO:0005829,GO:0005886,GO:0006082,GO:0006139,GO:0006399,GO:0006412,GO:0006418,GO:0006430,GO:0006518,GO:0006520,GO:0006629,GO:0006644,GO:0006650,GO:0006725,GO:0006793,GO:0006796,GO:0006807,GO:0008150,GO:0008152,GO:0008610,GO:0008654,GO:0009058,GO:0009059,GO:0009405,GO:0009987,GO:0010467,GO:0016020,GO:0016070,GO:0019538,GO:0019637,GO:0019752,GO:0030312,GO:…	K04567-ko00970 Aminoacyl-tRNA biosynthesis	COG1190-Lysyl-tRNA synthetase (class II)[J]
GE02013	3.67	19.98	-2.4447	2.09e-13	1.12e-12	down	GE02013	3-ketoacyl-CoA thiolase	-	K00632-ko01212 Fatty acid metabolism;ko00071 Fatty acid degradation;ko00592 alpha-Linolenic acid metabolism;ko00280 Valine, leucine and isoleucine degradation;ko00281 Geraniol degradation;ko00362 Benzoate degradation;ko00642 Ethylbenzene degradation	COG0183-Acetyl-CoA acetyltransferase[I]
GE01517	4.67	25.37	-2.44163	2.09e-13	1.12e-12	down	GE01517	Glutamate transport system permease protein GluD	-	K10007-ko02010 ABC transporters	COG0765-ABC-type amino acid transport system, permease component[E]
GE01503	4.89	22.98	-2.23247	2.64e-13	1.41e-12	down	GE01503	Acyl-CoA dehydrogenase	-	-	COG1960-Acyl-CoA dehydrogenases[I]
GE00889	14.55	38.54	-1.40534	2.79e-13	1.49e-12	down	GE00889	Arginine decarboxylase	-	K01585-ko00330 Arginine and proline metabolism	COG1982-Arginine/lysine/ornithine decarboxylases[E]
GE01408	1.91	18.2	-3.25229	3.28e-13	1.74e-12	down	GE01408	Pyridoxal biosynthesis lyase PdxS	GO:0003674,GO:0003824,GO:0005575,GO:0005886,GO:0006081,GO:0006725,GO:0006766,GO:0006767,GO:0006793,GO:0006796,GO:0006807,GO:0008150,GO:0008152,GO:0009058,GO:0009110,GO:0009987,GO:0016020,GO:0016829,GO:0016840,GO:0016843,GO:0017144,GO:0018130,GO:0019438,GO:0019637,GO:0034641,GO:0040007,GO:0042364,GO:0042816,GO:0042819,GO:0042822,GO:0042823,GO:0044237,GO:0044249,GO:0044271,GO:0044281,GO:0044283,GO:…	K06215-ko00750 Vitamin B6 metabolism	COG0214-Pyridoxine biosynthesis enzyme[H]
GE03486	2.26	21.56	-3.25396	3.28e-13	1.74e-12	down	GE03486	putative oxidoreductase Mb3820	GO:0000271,GO:0005575,GO:0005886,GO:0005975,GO:0005976,GO:0008150,GO:0008152,GO:0009058,GO:0009059,GO:0009987,GO:0010383,GO:0016020,GO:0016051,GO:0031221,GO:0033692,GO:0034637,GO:0034645,GO:0035884,GO:0040007,GO:0042546,GO:0043170,GO:0044036,GO:0044038,GO:0044085,GO:0044237,GO:0044238,GO:0044249,GO:0044260,GO:0044262,GO:0044264,GO:0070589,GO:0070592,GO:0071554,GO:0071704,GO:0071840,GO:0071944,GO:…	-	COG0300-Short-chain dehydrogenases of various substrate specificities[R]
GE02801	17.09	39.05	-1.19217	3.41e-13	1.81e-12	down	GE02801	Regulatory protein MsrR	-	-	COG1316-Transcriptional regulator[K]
GE01093	8.64	22.6	-1.38722	3.47e-13	1.83e-12	down	GE01093	putative protein Cgl0966/cg1103	-	-	COG2898-Uncharacterized conserved protein[S]
GE00849	29.79	82.89	-1.47637	3.95e-13	2.08e-12	down	GE00849	Imidazoleglycerol-phosphate dehydratase	GO:0000105,GO:0003674,GO:0003824,GO:0004424,GO:0006082,GO:0006520,GO:0006547,GO:0006725,GO:0006807,GO:0008150,GO:0008152,GO:0008652,GO:0009058,GO:0009987,GO:0016053,GO:0016829,GO:0016835,GO:0016836,GO:0018130,GO:0019438,GO:0019752,GO:0034641,GO:0040007,GO:0043436,GO:0044237,GO:0044238,GO:0044249,GO:0044281,GO:0044283,GO:0046394,GO:0046483,GO:0052803,GO:0071704,GO:1901360,GO:1901362,GO:1901564,GO:…	K01693-ko01230 Biosynthesis of amino acids;ko00340 Histidine metabolism	COG0131-Imidazoleglycerol-phosphate dehydratase[E]
GE03924	3.44	14.67	-2.09239	3.99e-13	2.1e-12	down	GE03924	putative monooxygenase y4iD	-	K14520-ko00363 Bisphenol degradation	COG2072-Predicted flavoprotein involved in K+ transport[P]
GE01000	8.48	42.12	-2.31237	4.04e-13	2.12e-12	down	GE01000	hypothetical protein	-	-	COG2306-Uncharacterized conserved protein[S]
GE02388	26.34	61.75	-1.22918	4.11e-13	2.16e-12	down	GE02388	Succinyl-CoA ligase subunit beta	GO:0005575,GO:0005618,GO:0005622,GO:0005737,GO:0005829,GO:0008150,GO:0030312,GO:0040007,GO:0071944	K01903-ko01200 Carbon metabolism;ko00020 Citrate cycle (TCA cycle);ko00640 Propanoate metabolism;ko00660 C5-Branched dibasic acid metabolism;ko00720 Carbon fixation pathways in prokaryotes	COG0045-Succinyl-CoA synthetase, beta subunit[C]
GE03525	7.1	41.67	-2.55312	4.44e-13	2.33e-12	down	GE03525	Putative decaprenylphosphoryl-5-phosphoribose phosphatase Rv3807c	-	-	-
GE04531	11	27.56	-1.32507	4.59e-13	2.4e-12	down	GE04531	Serine/threonine-protein kinase PknG	GO:0001898,GO:0001899,GO:0002682,GO:0002684,GO:0003674,GO:0003824,GO:0004672,GO:0004674,GO:0005488,GO:0005515,GO:0005575,GO:0005622,GO:0005737,GO:0005829,GO:0005886,GO:0006082,GO:0006464,GO:0006468,GO:0006520,GO:0006536,GO:0006538,GO:0006541,GO:0006543,GO:0006793,GO:0006796,GO:0006807,GO:0008150,GO:0008152,GO:0009056,GO:0009063,GO:0009064,GO:0009065,GO:0009405,GO:0009605,GO:0009607,GO:0009987,GO:…	-	COG0515-Serine/threonine protein kinase[RTKL]
GE04637	37.19	89.07	-1.26002	5.24e-13	2.74e-12	down	GE04637	putative protein Mb0489c	GO:0005575,GO:0005886,GO:0005887,GO:0008150,GO:0016020,GO:0016021,GO:0031224,GO:0031226,GO:0040007,GO:0071944	-	-
GE02980	40.77	100.02	-1.29471	5.44e-13	2.84e-12	down	GE02980	A-factor receptor protein	-	-	-
GE03005	7.21	32.04	-2.1518	6.8e-13	3.53e-12	down	GE03005	(-)-trans-carveol dehydrogenase	-	-	COG4221-Short-chain alcohol dehydrogenase of unknown specificity[R]
GE04333	40.95	103.49	-1.33756	7.27e-13	3.77e-12	down	GE04333	Serine acetyltransferase	GO:0000096,GO:0000097,GO:0003674,GO:0003824,GO:0005575,GO:0005622,GO:0005737,GO:0005829,GO:0006082,GO:0006520,GO:0006534,GO:0006535,GO:0006563,GO:0006790,GO:0006807,GO:0008150,GO:0008152,GO:0008374,GO:0008652,GO:0009001,GO:0009058,GO:0009069,GO:0009070,GO:0009987,GO:0016053,GO:0016407,GO:0016412,GO:0016413,GO:0016740,GO:0016746,GO:0016747,GO:0019344,GO:0019752,GO:0043436,GO:0044237,GO:0044238,GO:…	K00640-ko01200 Carbon metabolism;ko01230 Biosynthesis of amino acids;ko00920 Sulfur metabolism;ko00270 Cysteine and methionine metabolism	COG1045-Serine acetyltransferase[E]
GE04098	8.44	34.39	-2.02667	9.21e-13	4.76e-12	down	GE04098	Oxidoreductase UcpA	-	-	COG0300-Short-chain dehydrogenases of various substrate specificities[R]
GE03255	6.95	43.13	-2.63361	9.87e-13	5.1e-12	down	GE03255	Cadmium-induced protein CadI	-	-	-
GE02417	5.51	28.22	-2.35659	1e-12	5.18e-12	down	GE02417	Thymidylate synthase	GO:0003674,GO:0003824,GO:0004799,GO:0006139,GO:0006220,GO:0006221,GO:0006231,GO:0006244,GO:0006725,GO:0006753,GO:0006793,GO:0006796,GO:0006807,GO:0008150,GO:0008152,GO:0008168,GO:0009056,GO:0009058,GO:0009117,GO:0009123,GO:0009124,GO:0009125,GO:0009129,GO:0009130,GO:0009131,GO:0009157,GO:0009159,GO:0009162,GO:0009165,GO:0009166,GO:0009176,GO:0009177,GO:0009178,GO:0009219,GO:0009221,GO:0009223,GO:…	K00560-ko00240 Pyrimidine metabolism;ko00670 One carbon pool by folate	COG0207-Thymidylate synthase[F]
GE04402	13.58	32.9	-1.2766	1.01e-12	5.21e-12	down	GE04402	putative peptidase YuxL	-	-	COG1506-Dipeptidyl aminopeptidases/acylaminoacyl-peptidases[E]
GE03512	0.52	4.8	-3.20645	1.04e-12	5.32e-12	down	GE03512	putative arabinosyltransferase C	-	-	-
GE01753	3.64	33.64	-3.20817	1.04e-12	5.32e-12	down	GE01753	hypothetical protein	-	-	COG3832-Uncharacterized conserved protein[S]
GE01374	79.26	185.36	-1.22567	1.05e-12	5.39e-12	down	GE01374	Transcriptional regulator BlaI	-	-	COG3682-Predicted transcriptional regulator[K]
GE00601	2.35	18.69	-2.99153	1.09e-12	5.58e-12	down	GE00601	GTPase Era	GO:0005575,GO:0005622,GO:0005737,GO:0005829,GO:0008150,GO:0040007	-	COG1159-GTPase[R]
GE04006	22.25	52.93	-1.25028	1.13e-12	5.79e-12	down	GE04006	UPF0053 protein sll0260	-	-	COG1253-Hemolysins and related proteins containing CBS domains[R]
GE04773	11.17	37.32	-1.74032	1.14e-12	5.84e-12	down	GE04773	hypothetical protein	-	K02067-ko02010 ABC transporters	COG1463-ABC-type transport system involved in resistance to organic solvents, periplasmic component[Q]
GE04416	35.92	132.89	-1.88737	1.42e-12	7.21e-12	down	GE04416	hypothetical protein	-	-	-
GE03321	32.25	70.81	-1.13465	1.43e-12	7.26e-12	down	GE03321	putative acyl-CoA dehydrogenase YngJ	-	-	COG1960-Acyl-CoA dehydrogenases[I]
GE04205	179.09	392.18	-1.13083	1.6e-12	8.14e-12	down	GE04205	Dodecin	-	-	COG3360-Uncharacterized conserved protein[S]
GE03784	14.5	33.07	-1.18947	1.65e-12	8.37e-12	down	GE03784	Penicillin-binding protein 1A	GO:0001666,GO:0003674,GO:0005488,GO:0005575,GO:0006950,GO:0008144,GO:0008150,GO:0008658,GO:0009628,GO:0009987,GO:0030288,GO:0030313,GO:0031406,GO:0031975,GO:0033218,GO:0033293,GO:0033554,GO:0036094,GO:0036293,GO:0036294,GO:0042221,GO:0042597,GO:0043167,GO:0043168,GO:0043177,GO:0050896,GO:0051716,GO:0070482,GO:0070887,GO:0071453,GO:0071456,GO:0097159,GO:1901363,GO:1901681	-	COG0744-Membrane carboxypeptidase (penicillin-binding protein)[M]
GE04154	27.28	56.12	-1.04067	1.66e-12	8.42e-12	down	GE04154	Dihydroxy-acid dehydratase 1	GO:0003674,GO:0003824,GO:0004160,GO:0005575,GO:0005886,GO:0006082,GO:0006520,GO:0006807,GO:0008150,GO:0008152,GO:0008652,GO:0009058,GO:0009081,GO:0009082,GO:0009987,GO:0016020,GO:0016053,GO:0016829,GO:0016835,GO:0016836,GO:0019752,GO:0040007,GO:0043436,GO:0044237,GO:0044238,GO:0044249,GO:0044281,GO:0044283,GO:0046394,GO:0071704,GO:0071944,GO:1901564,GO:1901566,GO:1901576	K01687-ko01210 2-Oxocarboxylic acid metabolism;ko01230 Biosynthesis of amino acids;ko00290 Valine, leucine and isoleucine biosynthesis;ko00770 Pantothenate and CoA biosynthesis	COG0129-Dihydroxyacid dehydratase/phosphogluconate dehydratase[EG]
GE01079	14.22	44.8	-1.65558	1.67e-12	8.46e-12	down	GE01079	hypothetical protein	-	-	-
GE03394	13.67	34.14	-1.32045	1.91e-12	9.65e-12	down	GE03394	putative ABC transporter ATP-binding protein MT1311	-	-	COG1132-ABC-type multidrug transport system, ATPase and permease components[V]
GE00543	22.11	89.83	-2.0225	2.39e-12	1.2e-11	down	GE00543	50S ribosomal protein L21	GO:0003674,GO:0003735,GO:0005198,GO:0005575,GO:0005886,GO:0008150,GO:0016020,GO:0040007,GO:0071944	K02888-ko03010 Ribosome	COG0261-Ribosomal protein L21[J]
GE01790	3.29	24.16	-2.87646	2.43e-12	1.22e-11	down	GE01790	Bacitracin transport ATP-binding protein BcrA	-	-	COG4555-ABC-type Na+ transport system, ATPase component[CP]
GE01789	1.62	17.86	-3.46267	2.69e-12	1.35e-11	down	GE01789	hypothetical protein	-	-	-
GE04082	9.97	32.09	-1.68646	2.7e-12	1.36e-11	down	GE04082	Flavin-dependent monooxygenase, oxygenase subunit HsaA	-	K16047-ko00984 Steroid degradation	COG1960-Acyl-CoA dehydrogenases[I]
GE00374	4.14	20.24	-2.28951	2.79e-12	1.4e-11	down	GE00374	Sensor histidine kinase YxjM	-	-	COG4585-Signal transduction histidine kinase[T]
GE00680	67	134.55	-1.00591	2.89e-12	1.44e-11	down	GE00680	putative protein Rv2219 (Precursor)	-	-	-
GE01077	10.88	35.21	-1.69431	3.04e-12	1.52e-11	down	GE01077	Octanoyltransferase LipM	-	K03800-ko00785 Lipoic acid metabolism	COG0095-Lipoate-protein ligase A[H]
GE03099	31.87	70.98	-1.15521	3.37e-12	1.68e-11	down	GE03099	hypothetical protein	-	-	COG5282-Uncharacterized conserved protein[S]
GE04781	221.97	459.18	-1.0487	3.44e-12	1.71e-11	down	GE04781	hypothetical protein	-	-	-
GE02268	24.31	71.59	-1.55821	3.48e-12	1.73e-11	down	GE02268	50S ribosomal protein L25	GO:0003674,GO:0003676,GO:0003723,GO:0005488,GO:0005575,GO:0005622,GO:0005737,GO:0005829,GO:0005840,GO:0006412,GO:0006518,GO:0006807,GO:0008097,GO:0008150,GO:0008152,GO:0009058,GO:0009059,GO:0009987,GO:0010467,GO:0015934,GO:0019538,GO:0019843,GO:0022625,GO:0022626,GO:0032991,GO:0034641,GO:0034645,GO:0043043,GO:0043170,GO:0043226,GO:0043228,GO:0043229,GO:0043232,GO:0043603,GO:0043604,GO:0044237,GO:…	K02897-ko03010 Ribosome	COG1825-Ribosomal protein L25 (general stress protein Ctc)[J]
GE04855	20.88	56.57	-1.43792	3.73e-12	1.85e-11	down	GE04855	Dimodular nonribosomal peptide synthase	-	-	COG3319-Thioesterase domains of type I polyketide synthases or non-ribosomal peptide synthetases[Q]
GE04344	11.37	34.85	-1.61593	4.14e-12	2.05e-11	down	GE04344	Porin PorA	-	-	-
GE03555	7.47	24.93	-1.7387	5.34e-12	2.63e-11	down	GE03555	Putative diacylglycerol O-acyltransferase Rv3740c	-	K00635-ko00561 Glycerolipid metabolism	-
GE03812	6.63	17.72	-1.4183	5.51e-12	2.71e-11	down	GE03812	hypothetical protein	-	-	-
GE01980	14.23	50.15	-1.81731	6.51e-12	3.2e-11	down	GE01980	Transcriptional regulatory protein DevR (DosR)	GO:0001666,GO:0003674,GO:0003676,GO:0003677,GO:0003700,GO:0005488,GO:0005575,GO:0005576,GO:0005615,GO:0005618,GO:0005622,GO:0005737,GO:0005829,GO:0005886,GO:0006355,GO:0006950,GO:0008150,GO:0009405,GO:0009628,GO:0009889,GO:0009891,GO:0009893,GO:0010468,GO:0010556,GO:0010557,GO:0010565,GO:0010604,GO:0010628,GO:0016020,GO:0018995,GO:0019216,GO:0019217,GO:0019219,GO:0019222,GO:0022611,GO:0030312,GO:…	K07695-ko02020 Two-component system	COG2197-Response regulator containing a CheY-like receiver domain and an HTH DNA-binding domain[TK]
GE03092	16.56	48.84	-1.56036	6.61e-12	3.24e-11	down	GE03092	Dihydropteroate synthase 1	GO:0003674,GO:0003824,GO:0004156,GO:0005575,GO:0005622,GO:0005737,GO:0005829,GO:0006082,GO:0006575,GO:0006725,GO:0006760,GO:0006807,GO:0008150,GO:0008152,GO:0009058,GO:0009396,GO:0009987,GO:0016053,GO:0016740,GO:0016765,GO:0018130,GO:0019438,GO:0019752,GO:0034641,GO:0040007,GO:0042398,GO:0042558,GO:0042559,GO:0043436,GO:0043603,GO:0043604,GO:0044237,GO:0044249,GO:0044271,GO:0044281,GO:0044283,GO:…	K00796-ko00790 Folate biosynthesis	COG0294-Dihydropteroate synthase and related enzymes[H]
GE00044	37.88	91.52	-1.27265	6.7e-12	3.28e-11	down	GE00044	Cell surface lipoprotein MPT83 (Precursor)	GO:0005575,GO:0005576,GO:0005615,GO:0005886,GO:0008150,GO:0009605,GO:0009607,GO:0016020,GO:0030288,GO:0030313,GO:0031975,GO:0042597,GO:0043207,GO:0044403,GO:0044419,GO:0050896,GO:0051701,GO:0051704,GO:0051707,GO:0052173,GO:0052200,GO:0052572,GO:0071944,GO:0075136	-	COG2335-Secreted and surface protein containing fasciclin-like repeats[M]
GE04626	10.18	38.36	-1.91387	7.06e-12	3.45e-11	down	GE04626	putative HTH-type transcriptional regulator Rv0472c	GO:0003674,GO:0003700,GO:0005575,GO:0005576,GO:0006355,GO:0008150,GO:0009889,GO:0010468,GO:0010556,GO:0019219,GO:0019222,GO:0031323,GO:0031326,GO:0050789,GO:0050794,GO:0051171,GO:0051252,GO:0060255,GO:0065007,GO:0080090,GO:0140110,GO:1903506,GO:2000112,GO:2001141	-	-
GE01585	22.99	91.01	-1.98502	9.19e-12	4.47e-11	down	GE01585	NADH-quinone oxidoreductase subunit K	GO:0003674,GO:0003824,GO:0003954,GO:0005575,GO:0005886,GO:0008137,GO:0008150,GO:0008152,GO:0016020,GO:0016491,GO:0016651,GO:0016655,GO:0030964,GO:0032991,GO:0045271,GO:0045272,GO:0050136,GO:0055114,GO:0070469,GO:0070470,GO:0071944,GO:0098796,GO:0098797,GO:0098803,GO:1902494,GO:1990204	K00340-ko00190 Oxidative phosphorylation	COG0713-NADH:ubiquinone oxidoreductase subunit 11 or 4L (chain K)[C]
GE00062	4.75	26.01	-2.45307	9.76e-12	4.73e-11	down	GE00062	putative protein Mb2734	-	-	COG2267-Lysophospholipase[I]
GE03521	5.25	17.64	-1.74846	9.94e-12	4.81e-11	down	GE03521	Protein PS1 (Precursor)	-	-	COG0627-Predicted esterase[R]
GE00389	10.89	40.27	-1.8867	1.01e-11	4.87e-11	down	GE00389	Ureidoglycolate lyase	-	-	COG0179-2-keto-4-pentenoate hydratase/2-oxohepta-3-ene-1,7-dioic acid hydratase (catechol pathway)[Q]
GE00349	21	53.77	-1.35641	1.04e-11	5.02e-11	down	GE00349	putative 37.1 kDa protein in transposon TN4556	-	-	COG0500-SAM-dependent methyltransferases[QR]
GE02243	70.95	193.29	-1.44589	1.11e-11	5.35e-11	down	GE02243	hypothetical protein	-	-	-
GE01681	47.34	101.77	-1.10418	1.14e-11	5.47e-11	down	GE01681	Signal peptidase I	-	K03100-ko03060 Protein export;ko02024 Quorum sensing	COG0681-Signal peptidase I[U]
GE04633	20.53	51.89	-1.33772	1.25e-11	6.02e-11	down	GE04633	Non-heme chloroperoxidase	-	-	COG0596-Predicted hydrolases or acyltransferases (alpha/beta hydrolase superfamily) [R]
GE04716	28.62	71.87	-1.32837	1.26e-11	6.08e-11	down	GE04716	hypothetical protein	-	-	-
GE02906	13.22	39.78	-1.58932	1.29e-11	6.21e-11	down	GE02906	Thioredoxin reductase	-	-	COG0492-Thioredoxin reductase[O]
GE00933	18.79	53.9	-1.52032	1.32e-11	6.31e-11	down	GE00933	hypothetical protein	-	-	-
GE00769	52.82	120.59	-1.19095	1.34e-11	6.41e-11	down	GE00769	hypothetical protein	-	-	-
GE04762	35.65	82.05	-1.2026	1.42e-11	6.8e-11	down	GE04762	Transcription termination/antitermination protein NusG	GO:0005575,GO:0005618,GO:0005622,GO:0005737,GO:0005829,GO:0005886,GO:0006355,GO:0008150,GO:0009889,GO:0010468,GO:0010556,GO:0016020,GO:0019219,GO:0019222,GO:0030312,GO:0031323,GO:0031326,GO:0050789,GO:0050794,GO:0051171,GO:0051252,GO:0060255,GO:0065007,GO:0071944,GO:0080090,GO:1903506,GO:2000112,GO:2001141	-	COG0250-Transcription antiterminator[K]
GE03316	7.17	24.87	-1.79436	1.5e-11	7.17e-11	down	GE03316	HTH-type transcriptional regulator MtrR	-	-	COG1309-Transcriptional regulator[K]
GE02267	4.24	17.35	-2.0328	1.68e-11	8.02e-11	down	GE02267	Fumarate reductase flavoprotein subunit (Precursor)	-	K16051-ko00984 Steroid degradation	-
GE00148	9.05	33.89	-1.90487	1.81e-11	8.64e-11	down	GE00148	Bifunctional ligase/repressor BirA	-	K03524-ko00780 Biotin metabolism	COG0340-Biotin-(acetyl-CoA carboxylase) ligase[H]
GE00799	29.88	63.5	-1.08758	2.05e-11	9.72e-11	down	GE00799	Steroid C26-monooxygenase	-	K15981-ko00984 Steroid degradation	COG2124-Cytochrome P450[Q]
GE03383	10.65	31.4	-1.55991	2.09e-11	9.92e-11	down	GE03383	Queuine tRNA-ribosyltransferase	-	-	COG0343-Queuine/archaeosine tRNA-ribosyltransferase[J]
GE04599	3.57	24.78	-2.79518	2.17e-11	1.03e-10	down	GE04599	GTP pyrophosphokinase YwaC	-	K07816-ko00230 Purine metabolism	COG2357-Uncharacterized protein conserved in bacteria[S]
GE01232	6.51	25.32	-1.95955	2.24e-11	1.06e-10	down	GE01232	Pyrimidine-specific ribonucleoside hydrolase RihA	-	-	COG1957-Inosine-uridine nucleoside N-ribohydrolase[F]
GE00730	16.7	45.56	-1.44792	2.45e-11	1.16e-10	down	GE00730	5,10-methylenetetrahydrofolate reductase	-	K00297-ko01200 Carbon metabolism;ko00720 Carbon fixation pathways in prokaryotes;ko00670 One carbon pool by folate	COG0685-5,10-methylenetetrahydrofolate reductase[E]
GE04890	18.74	68.86	-1.87755	2.58e-11	1.22e-10	down	GE04890	30S ribosomal protein S11	GO:0000028,GO:0000462,GO:0003674,GO:0003676,GO:0003723,GO:0003729,GO:0003735,GO:0005198,GO:0005488,GO:0005575,GO:0005622,GO:0005737,GO:0005829,GO:0005840,GO:0005886,GO:0006139,GO:0006364,GO:0006396,GO:0006412,GO:0006518,GO:0006725,GO:0006807,GO:0006996,GO:0008150,GO:0008152,GO:0009058,GO:0009059,GO:0009987,GO:0010467,GO:0015935,GO:0016020,GO:0016043,GO:0016070,GO:0016072,GO:0019538,GO:0019843,GO:…	K02948-ko03010 Ribosome	COG0100-Ribosomal protein S11[J]
GE00950	32.8	80.18	-1.28955	2.82e-11	1.33e-10	down	GE00950	putative oxidoreductase MW2403	-	-	COG4221-Short-chain alcohol dehydrogenase of unknown specificity[R]
GE01504	24.01	53.82	-1.16451	2.96e-11	1.39e-10	down	GE01504	Putative pyrimidine permease RutG	-	-	COG2233-Xanthine/uracil permeases[F]
GE00429	9.34	27.35	-1.55005	3.03e-11	1.42e-10	down	GE00429	Amino-acid carrier protein AlsT	-	-	COG1115-Na+/alanine symporter[E]
GE01394	2.73	19.9	-2.8658	3.04e-11	1.43e-10	down	GE01394	putative peptidyl-prolyl cis-trans isomerase B	-	-	COG0652-Peptidyl-prolyl cis-trans isomerase (rotamase) - cyclophilin family[O]
GE00943	7.48	36.5	-2.28679	3.08e-11	1.44e-10	down	GE00943	hypothetical protein	-	-	COG5483-Uncharacterized conserved protein[S]
GE00394	29.64	60.7	-1.03415	3.27e-11	1.53e-10	down	GE00394	3-isopropylmalate dehydratase large subunit	GO:0005575,GO:0005618,GO:0030312,GO:0071944	K01703-ko01210 2-Oxocarboxylic acid metabolism;ko01230 Biosynthesis of amino acids;ko00660 C5-Branched dibasic acid metabolism;ko00290 Valine, leucine and isoleucine biosynthesis	COG0065-3-isopropylmalate dehydratase large subunit[E]
GE01837	5.25	13.81	-1.39532	3.38e-11	1.58e-10	down	GE01837	putative ATP-dependent helicase YqhH	-	-	COG0553-Superfamily II DNA/RNA helicases, SNF2 family[KL]
GE02059	50.47	131.79	-1.38474	3.48e-11	1.63e-10	down	GE02059	Anti-sigma-E factor RseA	-	-	-
GE00885	39.05	79.44	-1.02454	3.69e-11	1.72e-10	down	GE00885	Putative glutamate--cysteine ligase 2-1	-	-	COG2170-Uncharacterized conserved protein[S]
GE00725	6.93	47.33	-2.77183	3.74e-11	1.74e-10	down	GE00725	DNA-binding protein Rv2175c	GO:0003674,GO:0003676,GO:0003677,GO:0005488,GO:0006464,GO:0006468,GO:0006793,GO:0006796,GO:0006807,GO:0008150,GO:0008152,GO:0009987,GO:0010565,GO:0016310,GO:0018107,GO:0018193,GO:0018210,GO:0019216,GO:0019217,GO:0019222,GO:0019538,GO:0031323,GO:0036211,GO:0043170,GO:0043412,GO:0044237,GO:0044238,GO:0044260,GO:0044267,GO:0050789,GO:0050794,GO:0062012,GO:0065007,GO:0071704,GO:0080090,GO:0097159,GO:…	-	-
GE02601	15.97	42.12	-1.39914	3.93e-11	1.83e-10	down	GE02601	Carboxylesterase NlhH	-	-	COG0657-Esterase/lipase[I]
GE02975	5.42	18.84	-1.79743	4.19e-11	1.95e-10	down	GE02975	3-[(3aS,4S,7aS)-7a-methyl-1, 5-dioxo-octahydro-1H-inden-4-yl]propanoyl:CoA ligase	GO:0003674,GO:0005488,GO:0005515,GO:0005575,GO:0005622,GO:0005737,GO:0005777,GO:0042579,GO:0043226,GO:0043227,GO:0043229,GO:0043231,GO:0051087	K18687-ko00984 Steroid degradation	COG0318-Acyl-CoA synthetases (AMP-forming)/AMP-acid ligases II[IQ]
GE01718	5.39	34.73	-2.68783	4.45e-11	2.06e-10	down	GE01718	putative protein YqjC	-	K05606-ko01200 Carbon metabolism;ko00630 Glyoxylate and dicarboxylate metabolism;ko00640 Propanoate metabolism;ko00720 Carbon fixation pathways in prokaryotes;ko00280 Valine, leucine and isoleucine degradation	COG0346-Lactoylglutathione lyase and related lyases[E]
GE03351	22.82	57.41	-1.331	4.47e-11	2.07e-10	down	GE03351	putative HTH-type transcriptional regulator YagI	-	-	COG1414-Transcriptional regulator[K]
GE02018	20.64	88.87	-2.10625	4.89e-11	2.25e-10	down	GE02018	hypothetical protein	-	-	COG2261-Predicted membrane protein[S]
GE02403	18.91	135.64	-2.84256	5.28e-11	2.43e-10	down	GE02403	hypothetical protein	-	-	-
GE01922	7.7	23.39	-1.60296	5.32e-11	2.44e-10	down	GE01922	3-oxosteroid 1-dehydrogenase	-	-	COG0029-Aspartate oxidase[H]
GE03411	2.7	18.21	-2.7537	6.43e-11	2.95e-10	down	GE03411	putative glycosyltransferase YibD	-	-	COG1215-Glycosyltransferases, probably involved in cell wall biogenesis[M]
GE01010	23.02	62.41	-1.43889	6.62e-11	3.03e-10	down	GE01010	putative protein YcbL	-	-	COG0491-Zn-dependent hydrolases, including glyoxylases[R]
GE01991	15.9	47.75	-1.58647	6.81e-11	3.11e-10	down	GE01991	Bacitracin export ATP-binding protein BceA	-	-	COG1136-ABC-type antimicrobial peptide transport system, ATPase component[V]
GE03527	14.57	37.36	-1.35849	6.94e-11	3.17e-10	down	GE03527	UDP-galactopyranose mutase	GO:0003674,GO:0003824,GO:0005575,GO:0005618,GO:0005886,GO:0008150,GO:0008767,GO:0009273,GO:0009987,GO:0016020,GO:0016853,GO:0016866,GO:0030312,GO:0042546,GO:0044085,GO:0071554,GO:0071766,GO:0071840,GO:0071944	K01854-ko00052 Galactose metabolism;ko00520 Amino sugar and nucleotide sugar metabolism	COG0562-UDP-galactopyranose mutase[M]
GE00532	47.03	97.52	-1.05212	7.01e-11	3.2e-10	down	GE00532	Protein FdhD-like protein	-	-	COG1526-Uncharacterized protein required for formate dehydrogenase activity[C]
GE04302	0.95	8.49	-3.15977	7.2e-11	3.28e-10	down	GE04302	putative ABC transporter ATP-binding protein YdiF	-	-	COG0488-ATPase components of ABC transporters with duplicated ATPase domains[R]
GE01343	13.56	55.76	-2.03987	7.21e-11	3.28e-10	down	GE01343	3-dehydroquinate dehydratase	GO:0003674,GO:0003824,GO:0003855,GO:0005575,GO:0005622,GO:0005737,GO:0005829,GO:0006082,GO:0008150,GO:0008152,GO:0009058,GO:0009423,GO:0009987,GO:0016053,GO:0016829,GO:0016835,GO:0016836,GO:0019752,GO:0040007,GO:0043436,GO:0043648,GO:0043650,GO:0044237,GO:0044249,GO:0044281,GO:0044283,GO:0046394,GO:0046417,GO:0071704,GO:1901576	K03786-ko01230 Biosynthesis of amino acids;ko00400 Phenylalanine, tyrosine and tryptophan biosynthesis	COG0757-3-dehydroquinate dehydratase II[E]
GE03191	10.26	43.72	-2.09126	7.78e-11	3.54e-10	down	GE03191	hypothetical protein	-	-	-
GE01352	12.87	33.31	-1.37194	7.93e-11	3.6e-10	down	GE01352	putative AAA domain-containing protein Rv2559c	-	-	COG2256-ATPase related to the helicase subunit of the Holliday junction resolvase[L]
GE00512	6.04	19.72	-1.70704	8.36e-11	3.79e-10	down	GE00512	Oligo-1,6-glucosidase	-	K01187-ko00052 Galactose metabolism;ko00500 Starch and sucrose metabolism	COG0366-Glycosidases[G]
GE04530	9.53	57.52	-2.59352	8.72e-11	3.95e-10	down	GE04530	hypothetical protein	-	-	-
GE02630	11.73	37.26	-1.66742	8.73e-11	3.95e-10	down	GE02630	putative oxidoreductase	-	-	COG0300-Short-chain dehydrogenases of various substrate specificities[R]
GE03194	8.63	33.09	-1.93896	8.99e-11	4.06e-10	down	GE03194	putative Nudix hydrolase NudL	-	-	-
GE01223	4.44	17.27	-1.95964	9.61e-11	4.33e-10	down	GE01223	putative oxidoreductase	-	-	COG0300-Short-chain dehydrogenases of various substrate specificities[R]
GE00741	12.61	30.46	-1.27235	9.89e-11	4.45e-10	down	GE00741	Penicillin-binding protein PbpB	-	K03587-ko00550 Peptidoglycan biosynthesis;ko01501 beta-Lactam resistance	COG0768-Cell division protein FtsI/penicillin-binding protein 2[M]
GE01520	21.39	51.67	-1.27239	9.89e-11	4.45e-10	down	GE01520	Protein RecA	GO:0000150,GO:0000166,GO:0000287,GO:0000725,GO:0003674,GO:0003676,GO:0003677,GO:0003697,GO:0003824,GO:0004518,GO:0004519,GO:0004520,GO:0004536,GO:0005488,GO:0005524,GO:0005575,GO:0005622,GO:0005737,GO:0005829,GO:0006139,GO:0006259,GO:0006281,GO:0006310,GO:0006725,GO:0006807,GO:0006950,GO:0006974,GO:0007154,GO:0008094,GO:0008144,GO:0008150,GO:0008152,GO:0009314,GO:0009411,GO:0009416,GO:0009432,GO:…	K03553-ko03440 Homologous recombination	COG0468-RecA/RadA recombinase[L]
GE02811	19.96	52.29	-1.38942	1.05e-10	4.71e-10	down	GE02811	hypothetical protein	-	-	-
GE04594	2.45	13.08	-2.41651	1.15e-10	5.16e-10	down	GE04594	Dihydrolipoyl dehydrogenase	GO:0000166,GO:0003674,GO:0003824,GO:0004148,GO:0005488,GO:0005515,GO:0005575,GO:0005576,GO:0005622,GO:0005737,GO:0005829,GO:0005886,GO:0008150,GO:0008152,GO:0009987,GO:0015036,GO:0016020,GO:0016491,GO:0016651,GO:0016655,GO:0016667,GO:0016668,GO:0019725,GO:0019899,GO:0032991,GO:0035375,GO:0036094,GO:0040007,GO:0042592,GO:0043167,GO:0043168,GO:0045254,GO:0045454,GO:0050660,GO:0050789,GO:0050794,GO:…	K00382-ko01200 Carbon metabolism;ko00010 Glycolysis / Gluconeogenesis;ko00020 Citrate cycle (TCA cycle);ko00620 Pyruvate metabolism;ko00630 Glyoxylate and dicarboxylate metabolism;ko00640 Propanoate metabolism;ko00260 Glycine, serine and threonine metabolism;ko00280 Valine, leucine and isoleucine degradation	COG1249-Pyruvate/2-oxoglutarate dehydrogenase complex, dihydrolipoamide dehydrogenase (E3) component, and related enzymes[C]
GE04073	1.65	12.36	-2.90514	1.27e-10	5.67e-10	down	GE04073	Pigment production hydroxylase	-	-	COG1960-Acyl-CoA dehydrogenases[I]
GE02966	14.97	70.47	-2.23493	1.33e-10	5.92e-10	down	GE02966	hypothetical protein	-	-	COG5552-Uncharacterized conserved protein[S]
GE00842	20.79	50	-1.26604	1.35e-10	6.01e-10	down	GE00842	hypothetical protein	-	-	-
GE01380	13.21	33.03	-1.32215	1.37e-10	6.09e-10	down	GE01380	Tetracenomycin C resistance and export protein	-	-	-
GE00370	15.39	36.61	-1.25024	1.54e-10	6.86e-10	down	GE00370	Glutamyl-tRNA(Gln) amidotransferase subunit A	GO:0008150,GO:0040007	K02433-ko00970 Aminoacyl-tRNA biosynthesis	COG0154-Asp-tRNAAsn/Glu-tRNAGln amidotransferase A subunit and related amidases[J]
GE02263	8.57	33.48	-1.96593	1.6e-10	7.09e-10	down	GE02263	Amidohydrolase EgtC	GO:0000096,GO:0000097,GO:0005575,GO:0005622,GO:0005737,GO:0005886,GO:0006082,GO:0006518,GO:0006520,GO:0006547,GO:0006548,GO:0006575,GO:0006577,GO:0006578,GO:0006725,GO:0006749,GO:0006751,GO:0006790,GO:0006807,GO:0008150,GO:0008152,GO:0008652,GO:0009056,GO:0009058,GO:0009063,GO:0009987,GO:0016020,GO:0016053,GO:0016054,GO:0019439,GO:0019752,GO:0032991,GO:0034641,GO:0042219,GO:0042398,GO:0043171,GO:…	K07008-ko00340 Histidine metabolism	COG0121-Predicted glutamine amidotransferase[R]
GE04661	54.37	119.28	-1.13347	1.6e-10	7.09e-10	down	GE04661	putative protein ML2442	-	-	-
GE03681	21.19	67.63	-1.67428	1.65e-10	7.3e-10	down	GE03681	FHA domain-containing protein FhaB	GO:0005575,GO:0005576,GO:0005886,GO:0006950,GO:0006979,GO:0008150,GO:0009987,GO:0016020,GO:0040007,GO:0044110,GO:0044117,GO:0044119,GO:0044403,GO:0044419,GO:0050896,GO:0051301,GO:0051704,GO:0071944	-	COG1716-FOG: FHA domain[T]
GE01658	77.43	188.82	-1.28605	1.88e-10	8.33e-10	down	GE01658	putative protein Rv2876	-	-	-
GE02017	4.49	49.33	-3.45768	1.91e-10	8.43e-10	down	GE02017	hypothetical protein	-	-	-
GE00891	20.89	87.09	-2.05969	1.96e-10	8.65e-10	down	GE00891	hypothetical protein	-	-	-
GE02645	27.14	137.81	-2.34419	2.01e-10	8.87e-10	down	GE02645	hypothetical protein	-	-	-
GE00146	62.31	151.1	-1.27797	2.2e-10	9.68e-10	down	GE00146	hypothetical protein	-	-	-
GE01281	38.69	79.55	-1.0399	2.59e-10	1.14e-09	down	GE01281	Heme A synthase	-	K02259-ko00190 Oxidative phosphorylation;ko00860 Porphyrin and chlorophyll metabolism;ko02020 Two-component system	-
GE01712	8.58	22.12	-1.3663	2.86e-10	1.26e-09	down	GE01712	Alpha-1,4-glucan:maltose-1-phosphate maltosyltransferase	GO:0003674,GO:0003824,GO:0005575,GO:0005622,GO:0005737,GO:0005829,GO:0005886,GO:0008150,GO:0016020,GO:0016740,GO:0016757,GO:0016758,GO:0040007,GO:0071944	K16147-ko00500 Starch and sucrose metabolism	COG0366-Glycosidases[G]
GE01527	15.48	43.11	-1.47762	2.89e-10	1.27e-09	down	GE01527	Diacylglycerol kinase	GO:0003674,GO:0003824,GO:0004143,GO:0005575,GO:0005886,GO:0006629,GO:0006643,GO:0006664,GO:0006793,GO:0006796,GO:0008150,GO:0008152,GO:0008610,GO:0009058,GO:0009247,GO:0009987,GO:0016020,GO:0016301,GO:0016310,GO:0016740,GO:0016772,GO:0016773,GO:0044237,GO:0044238,GO:0044249,GO:0044255,GO:0046467,GO:0071704,GO:0071944,GO:1901135,GO:1901137,GO:1901576,GO:1903509	K07029-ko00561 Glycerolipid metabolism;ko00564 Glycerophospholipid metabolism	COG1597-Sphingosine kinase and enzymes related to eukaryotic diacylglycerol kinase[IR]
GE03222	41.53	83.49	-1.00745	3.43e-10	1.5e-09	down	GE03222	putative metallophosphoesterase YkoQ	-	-	COG1408-Predicted phosphohydrolases[R]
GE02948	29.95	65.89	-1.1375	3.75e-10	1.64e-09	down	GE02948	hypothetical protein	-	-	COG1545-Predicted nucleic-acid-binding protein containing a Zn-ribbon[R]
GE03772	1.3	9.36	-2.848	3.84e-10	1.68e-09	down	GE03772	putative glycosyltransferase YdaM	-	-	COG1215-Glycosyltransferases, probably involved in cell wall biogenesis[M]
GE00562	18.26	51.16	-1.48633	3.87e-10	1.69e-09	down	GE00562	Glucosyl-3-phosphoglycerate phosphatase	GO:0003674,GO:0003824,GO:0006793,GO:0006796,GO:0008150,GO:0008152,GO:0009987,GO:0016311,GO:0016787,GO:0016788,GO:0016791,GO:0042578,GO:0044237	-	COG0406-Fructose-2,6-bisphosphatase[G]
GE01182	7.98	27.08	-1.76277	4.06e-10	1.77e-09	down	GE01182	HTH-type transcriptional regulator SkgA	-	-	COG0789-Predicted transcriptional regulators[K]
GE03258	0.59	9.3	-3.97844	4.15e-10	1.81e-09	down	GE03258	Arsenical-resistance protein Acr3	-	-	COG0798-Arsenite efflux pump ACR3 and related permeases[P]
GE01305	26.3	76.32	-1.537	4.39e-10	1.91e-09	down	GE01305	putative protein Mb1452	GO:0005575,GO:0005886,GO:0006766,GO:0006767,GO:0006771,GO:0006807,GO:0008150,GO:0008152,GO:0009058,GO:0009110,GO:0009231,GO:0009987,GO:0016020,GO:0017144,GO:0018130,GO:0034641,GO:0042364,GO:0042726,GO:0042727,GO:0044237,GO:0044249,GO:0044271,GO:0044281,GO:0044283,GO:0046483,GO:0071704,GO:0071944,GO:1901360,GO:1901362,GO:1901564,GO:1901566,GO:1901576	-	-
GE01598	5.1	16.72	-1.71301	4.4e-10	1.91e-09	down	GE01598	Acyl-CoA dehydrogenase, short-chain specific	-	K00249-ko01200 Carbon metabolism;ko01212 Fatty acid metabolism;ko00640 Propanoate metabolism;ko00071 Fatty acid degradation;ko00280 Valine, leucine and isoleucine degradation;ko00410 beta-Alanine metabolism;ko03320 PPAR signaling pathway	COG1960-Acyl-CoA dehydrogenases[I]
GE01397	15.85	35.13	-1.14822	4.8e-10	2.08e-09	down	GE01397	putative lipoprotein Mb2616c (Precursor)	-	K02035-ko02024 Quorum sensing	-
GE02911	12.3	31.05	-1.33593	4.8e-10	2.08e-09	down	GE02911	hypothetical protein	-	-	COG2966-Uncharacterized conserved protein[S]
GE02194	49.32	106.98	-1.1171	5.04e-10	2.18e-09	down	GE02194	putative protein Rv1109c	GO:0005575,GO:0005618,GO:0005622,GO:0005737,GO:0005829,GO:0005886,GO:0016020,GO:0030312,GO:0071944	-	-
GE04072	1.02	7.87	-2.94779	5.27e-10	2.28e-09	down	GE04072	3-oxosteroid 1-dehydrogenase	-	K05898-ko00984 Steroid degradation	-
GE01388	14.37	38.94	-1.43819	5.34e-10	2.3e-09	down	GE01388	Malate dehydrogenase	GO:0003674,GO:0003824,GO:0005575,GO:0005618,GO:0005622,GO:0005737,GO:0005829,GO:0005886,GO:0005975,GO:0006082,GO:0006091,GO:0006099,GO:0006101,GO:0006107,GO:0006108,GO:0006139,GO:0006725,GO:0006734,GO:0006753,GO:0006793,GO:0006796,GO:0006807,GO:0008150,GO:0008152,GO:0009060,GO:0009117,GO:0009987,GO:0015980,GO:0016020,GO:0016491,GO:0016614,GO:0016615,GO:0016616,GO:0016999,GO:0017144,GO:0019362,GO:…	K00024-ko01200 Carbon metabolism;ko00020 Citrate cycle (TCA cycle);ko00620 Pyruvate metabolism;ko00630 Glyoxylate and dicarboxylate metabolism;ko00710 Carbon fixation in photosynthetic organisms;ko00720 Carbon fixation pathways in prokaryotes;ko00680 Methane metabolism;ko00270 Cysteine and methionine metabolism	COG0039-Malate/lactate dehydrogenases[C]
GE00998	20.24	91.88	-2.18254	5.62e-10	2.42e-09	down	GE00998	hypothetical protein	-	-	-
GE00762	39.5	89.7	-1.18326	6.03e-10	2.6e-09	down	GE00762	Lipoprotein signal peptidase	GO:0006464,GO:0006497,GO:0006807,GO:0008150,GO:0008152,GO:0009058,GO:0009059,GO:0009405,GO:0009987,GO:0019538,GO:0034645,GO:0036211,GO:0040007,GO:0042157,GO:0042158,GO:0043170,GO:0043412,GO:0044237,GO:0044238,GO:0044249,GO:0044260,GO:0044267,GO:0044419,GO:0051704,GO:0071704,GO:1901564,GO:1901566,GO:1901576	K03101-ko03060 Protein export	COG0597-Lipoprotein signal peptidase[MU]
GE02097	6.94	19.37	-1.48082	6.39e-10	2.75e-09	down	GE02097	GTP-binding protein TypA/BipA-like protein	-	-	COG1217-Predicted membrane GTPase involved in stress response[T]
GE01615	11.22	26.68	-1.24969	6.44e-10	2.76e-09	down	GE01615	putative protein Rv2850c	-	K03404-ko00860 Porphyrin and chlorophyll metabolism	COG1239-Mg-chelatase subunit ChlI[H]
GE03261	2.24	15.88	-2.82564	6.65e-10	2.85e-09	down	GE03261	4,5:9,10-diseco-3-hydroxy-5,9, 17-trioxoandrosta-1(10),2-diene-4-oate hydrolase	-	-	COG0596-Predicted hydrolases or acyltransferases (alpha/beta hydrolase superfamily) [R]
GE01605	16.91	36.65	-1.11594	6.96e-10	2.98e-09	down	GE01605	Proline--tRNA ligase	GO:0005575,GO:0005618,GO:0005886,GO:0008150,GO:0016020,GO:0030312,GO:0040007,GO:0071944	K01881-ko00970 Aminoacyl-tRNA biosynthesis	COG0442-Prolyl-tRNA synthetase[J]
GE00630	27.63	90.61	-1.71343	7.37e-10	3.15e-09	down	GE00630	Acyl carrier protein	-	-	COG0236-Acyl carrier protein[IQ]
trna35	295.25	698.36	-1.24203	7.43e-10	3.17e-09	down	trna35	tRNA-Glu	-	-	-
GE02344	4.31	22.55	-2.38737	8.2e-10	3.49e-09	down	GE02344	Porin MspA (Precursor)	-	-	-
GE02109	8.91	46.59	-2.38652	8.2e-10	3.49e-09	down	GE02109	hypothetical protein	-	-	-
GE02374	4.07	37.23	-3.19336	9.05e-10	3.83e-09	down	GE02374	putative HTH-type transcriptional regulator YuzN	-	-	COG0640-Predicted transcriptional regulators[K]
GE00659	4.5	20.2	-2.16636	9.05e-10	3.83e-09	down	GE00659	Proline iminopeptidase	-	K01259-ko00330 Arginine and proline metabolism	COG0596-Predicted hydrolases or acyltransferases (alpha/beta hydrolase superfamily) [R]
GE02976	4.64	21.37	-2.20339	9.1e-10	3.84e-09	down	GE02976	putative enoyl-CoA hydratase echA12	-	K01692-ko01212 Fatty acid metabolism;ko00640 Propanoate metabolism;ko00650 Butanoate metabolism;ko00071 Fatty acid degradation;ko00280 Valine, leucine and isoleucine degradation;ko00310 Lysine degradation;ko00360 Phenylalanine metabolism;ko00380 Tryptophan metabolism;ko00410 beta-Alanine metabolism;ko00903 Limonene and pinene degradation;ko00281 Geraniol degradation;ko00362 Benzoate degradation;k…	COG1024-Enoyl-CoA hydratase/carnithine racemase[I]
GE03033	5.17	32.11	-2.63479	9.42e-10	3.97e-09	down	GE03033	putative N-acetyltransferase YhfO	-	-	-
GE04266	17.15	50.07	-1.54574	9.63e-10	4.06e-09	down	GE04266	Transcriptional regulator KdgR	-	-	COG1414-Transcriptional regulator[K]
GE04080	4.08	42.1	-3.36718	1.11e-09	4.67e-09	down	GE04080	hypothetical protein	-	-	-
GE04841	131.44	270.9	-1.04336	1.12e-09	4.71e-09	down	GE04841	UPF0410 protein ymge	-	-	-
GE01324	7.63	25.9	-1.7632	1.14e-09	4.8e-09	down	GE01324	Putative metal ion transporter YfjQ	-	-	COG0598-Mg2+ and Co2+ transporters[P]
GE00387	1.49	12.15	-3.02757	1.24e-09	5.2e-09	down	GE00387	3-isopropylmalate dehydrogenase	-	K00052-ko01210 2-Oxocarboxylic acid metabolism;ko01230 Biosynthesis of amino acids;ko00660 C5-Branched dibasic acid metabolism;ko00290 Valine, leucine and isoleucine biosynthesis	COG0473-Isocitrate/isopropylmalate dehydrogenase[CE]
GE02799	2.64	14.16	-2.42321	1.28e-09	5.35e-09	down	GE02799	putative tRNA-dihydrouridine synthase	GO:0008150,GO:0010565,GO:0019216,GO:0019217,GO:0019222,GO:0031323,GO:0050789,GO:0050794,GO:0062012,GO:0065007,GO:0080090	-	COG0042-tRNA-dihydrouridine synthase[J]
GE03922	0.54	6.55	-3.60046	1.28e-09	5.37e-09	down	GE03922	Long-chain-fatty-acid--CoA ligase	-	-	COG0318-Acyl-CoA synthetases (AMP-forming)/AMP-acid ligases II[IQ]
GE03553	19.06	52.52	-1.46232	1.3e-09	5.44e-09	down	GE03553	hypothetical protein	-	-	-
GE02991	35.33	78.56	-1.1529	1.32e-09	5.52e-09	down	GE02991	hypothetical protein	-	-	-
GE02609	2.76	14.21	-2.36417	1.36e-09	5.66e-09	down	GE02609	Putative aminoglycoside phosphotransferase	-	-	COG3173-Predicted aminoglycoside phosphotransferase[R]
GE00827	0.59	12.16	-4.36528	1.41e-09	5.86e-09	down	GE00827	hypothetical protein	-	-	COG1051-ADP-ribose pyrophosphatase[F]
GE01164	13.24	57.23	-2.11187	1.42e-09	5.93e-09	down	GE01164	hypothetical protein	-	-	-
GE00211	12.52	34.97	-1.48188	2.34e-09	9.65e-09	down	GE00211	Putative ribosome biogenesis GTPase RsgA	-	-	COG1162-Predicted GTPases[R]
GE00929	2.41	15.4	-2.67583	2.36e-09	9.74e-09	down	GE00929	N-acetylglucosaminyl-diphospho-decaprenol L-rhamnosyltransferase	-	-	COG1216-Predicted glycosyltransferases[R]
GE03450	97.86	244.39	-1.32039	2.38e-09	9.82e-09	down	GE03450	hypothetical protein	-	-	-
GE00151	18.05	53.28	-1.5616	2.42e-09	9.96e-09	down	GE00151	hypothetical protein	-	-	-
GE04829	15.85	35.87	-1.17829	2.5e-09	1.03e-08	down	GE04829	putative GMC-type oxidoreductase in thcA 5'region	-	-	COG2303-Choline dehydrogenase and related flavoproteins[E]
GE04336	13.94	30.03	-1.10717	2.83e-09	1.16e-08	down	GE04336	putative amino acid permease YdaO	-	-	-
GE00438	36.88	101.92	-1.46653	2.88e-09	1.18e-08	down	GE00438	Nitrogen regulatory protein P-II	GO:0000166,GO:0003674,GO:0005488,GO:0005524,GO:0005575,GO:0005886,GO:0008144,GO:0008150,GO:0016020,GO:0017076,GO:0030554,GO:0032553,GO:0032555,GO:0032559,GO:0035639,GO:0036094,GO:0040007,GO:0043167,GO:0043168,GO:0043531,GO:0044110,GO:0044117,GO:0044119,GO:0044403,GO:0044419,GO:0051704,GO:0071944,GO:0097159,GO:0097367,GO:1901265,GO:1901363	K04751-ko02020 Two-component system	COG0347-Nitrogen regulatory protein PII[E]
GE03150	7.05	20.14	-1.51437	2.9e-09	1.18e-08	down	GE03150	Periplasmic oligopeptide-binding protein (Precursor)	-	K15580-ko02010 ABC transporters;ko02024 Quorum sensing;ko01501 beta-Lactam resistance	COG4166-ABC-type oligopeptide transport system, periplasmic component[E]
GE01610	13.81	32.44	-1.23206	3.05e-09	1.25e-08	down	GE01610	putative MFS-type transporter EfpA	-	-	-
GE01872	10.84	35.15	-1.69716	3.09e-09	1.26e-08	down	GE01872	Lactate utilization protein A	-	-	COG0247-Fe-S oxidoreductase[C]
GE04524	19.77	46.7	-1.24011	3.11e-09	1.27e-08	down	GE04524	F420-dependent glucose-6-phosphate dehydrogenase	GO:0003674,GO:0003824,GO:0005488,GO:0005515,GO:0005575,GO:0005618,GO:0005622,GO:0005737,GO:0005829,GO:0005886,GO:0008150,GO:0008152,GO:0009987,GO:0016020,GO:0016491,GO:0016614,GO:0019725,GO:0030312,GO:0031406,GO:0036094,GO:0042592,GO:0042802,GO:0042803,GO:0043167,GO:0043168,GO:0043177,GO:0045454,GO:0046983,GO:0050789,GO:0050794,GO:0055114,GO:0065007,GO:0065008,GO:0070967,GO:0071944,GO:0097159,GO:…	-	COG2141-Coenzyme F420-dependent N5,N10-methylene tetrahydromethanopterin reductase and related flavin-dependent oxidoreductases[C]
GE00043	7.45	30.11	-2.01493	3.32e-09	1.35e-08	down	GE00043	ECF RNA polymerase sigma factor SigK	-	-	COG1595-DNA-directed RNA polymerase specialized sigma subunit, sigma24 homolog[K]
GE04193	3.23	11.08	-1.77835	3.56e-09	1.45e-08	down	GE04193	putative acyl-CoA dehydrogenase YngJ	-	-	COG1960-Acyl-CoA dehydrogenases[I]
GE00829	9.56	24.65	-1.36651	3.66e-09	1.49e-08	down	GE00829	L-aspartate oxidase	GO:0008150,GO:0040007	K00278-ko00250 Alanine, aspartate and glutamate metabolism;ko00760 Nicotinate and nicotinamide metabolism	COG0029-Aspartate oxidase[H]
GE02353	54.22	118.53	-1.12836	4.05e-09	1.64e-08	down	GE02353	Molybdenum cofactor biosynthesis protein B	-	-	COG0521-Molybdopterin biosynthesis enzymes[H]
GE01559	17.04	38.56	-1.17818	4.07e-09	1.65e-08	down	GE01559	putative zinc protease ML0855	GO:0005575,GO:0005886,GO:0016020,GO:0071944	-	COG0612-Predicted Zn-dependent peptidases[R]
GE03477	9.74	29.35	-1.59137	4.15e-09	1.68e-08	down	GE03477	dTDP-glucose 4,6-dehydratase	-	K01710-ko00523 Polyketide sugar unit biosynthesis;ko01055 Biosynthesis of vancomycin group antibiotics;ko00521 Streptomycin biosynthesis;ko00525 Acarbose and validamycin biosynthesis	COG1088-dTDP-D-glucose 4,6-dehydratase[M]
GE03716	11.33	32.12	-1.50332	4.17e-09	1.69e-08	down	GE03716	Sporulation initiation inhibitor protein Soj	-	-	COG1192-ATPases involved in chromosome partitioning[D]
GE00221	0.9	10.35	-3.52356	4.22e-09	1.7e-08	down	GE00221	Putative lipid kinase SSP1993	-	-	COG1597-Sphingosine kinase and enzymes related to eukaryotic diacylglycerol kinase[IR]
GE00196	50.55	102.63	-1.02167	4.23e-09	1.71e-08	down	GE00196	DNA-binding response regulator MtrA	GO:0005575,GO:0005886,GO:0006355,GO:0006464,GO:0006468,GO:0006793,GO:0006796,GO:0006807,GO:0008150,GO:0008152,GO:0009889,GO:0009891,GO:0009893,GO:0009987,GO:0010468,GO:0010556,GO:0010557,GO:0010604,GO:0010628,GO:0016020,GO:0016310,GO:0019219,GO:0019222,GO:0019538,GO:0031323,GO:0031325,GO:0031326,GO:0031328,GO:0036211,GO:0040007,GO:0043170,GO:0043412,GO:0044110,GO:0044117,GO:0044237,GO:0044238,GO:…	K07670-ko02020 Two-component system	COG0745-Response regulators consisting of a CheY-like receiver domain and a winged-helix DNA-binding domain[TK]
GE04011	15.84	40.91	-1.36888	4.28e-09	1.72e-08	down	GE04011	putative HTH-type transcriptional regulator YvbU	-	-	COG0583-Transcriptional regulator[K]
GE03518	17.85	43.4	-1.28177	4.51e-09	1.82e-08	down	GE03518	F420-dependent glucose-6-phosphate dehydrogenase	-	-	COG2141-Coenzyme F420-dependent N5,N10-methylene tetrahydromethanopterin reductase and related flavin-dependent oxidoreductases[C]
GE04793	2.04	12.04	-2.56119	4.6e-09	1.85e-08	down	GE04793	Acyl-CoA dehydrogenase fadE12	GO:0003674,GO:0003824,GO:0003995,GO:0005575,GO:0005886,GO:0008150,GO:0008152,GO:0016020,GO:0016491,GO:0016627,GO:0055114,GO:0071944	-	COG1960-Acyl-CoA dehydrogenases[I]
GE00354	11.16	34.78	-1.63992	4.73e-09	1.9e-08	down	GE00354	Putative acetyltransferase Rv3034c (Precursor)	GO:0005575,GO:0005618,GO:0005886,GO:0016020,GO:0030312,GO:0071944	-	COG0110-Acetyltransferase (isoleucine patch superfamily)[R]
GE01891	0.55	10.76	-4.2901	4.73e-09	1.9e-08	down	GE01891	putative enoyl-CoA hydratase	-	-	COG1024-Enoyl-CoA hydratase/carnithine racemase[I]
GE01810	79.56	168.4	-1.08178	4.85e-09	1.94e-08	down	GE01810	putative protein YeaO	-	-	COG3189-Uncharacterized conserved protein[S]
GE00401	28.62	59.15	-1.04735	4.86e-09	1.95e-08	down	GE00401	D-alanine--D-alanine ligase	GO:0000270,GO:0003674,GO:0003824,GO:0005575,GO:0005886,GO:0006022,GO:0006023,GO:0006024,GO:0006807,GO:0008150,GO:0008152,GO:0008716,GO:0009058,GO:0009059,GO:0009252,GO:0009273,GO:0009987,GO:0016020,GO:0016874,GO:0016879,GO:0016881,GO:0030203,GO:0034645,GO:0040007,GO:0042546,GO:0043170,GO:0044036,GO:0044038,GO:0044085,GO:0044237,GO:0044249,GO:0044260,GO:0070589,GO:0071554,GO:0071704,GO:0071840,GO:…	K01921-ko00473 D-Alanine metabolism;ko00550 Peptidoglycan biosynthesis;ko01502 Vancomycin resistance	COG1181-D-alanine-D-alanine ligase and related ATP-grasp enzymes[M]
GE04068	0.25	8.77	-5.13258	5.14e-09	2.05e-08	down	GE04068	putative protein Mb0965c	-	-	COG2141-Coenzyme F420-dependent N5,N10-methylene tetrahydromethanopterin reductase and related flavin-dependent oxidoreductases[C]
GE01487	18.46	59.85	-1.69695	5.18e-09	2.07e-08	down	GE01487	hypothetical protein	-	-	-
GE00992	25.13	53.69	-1.09524	5.72e-09	2.28e-08	down	GE00992	Homoisocitrate dehydrogenase	-	K00052-ko01210 2-Oxocarboxylic acid metabolism;ko01230 Biosynthesis of amino acids;ko00660 C5-Branched dibasic acid metabolism;ko00290 Valine, leucine and isoleucine biosynthesis	COG0473-Isocitrate/isopropylmalate dehydrogenase[CE]
GE01393	5.26	21.89	-2.05714	5.75e-09	2.28e-08	down	GE01393	putative peptidyl-prolyl cis-trans isomerase B	GO:0000413,GO:0003674,GO:0003755,GO:0003824,GO:0005575,GO:0005886,GO:0005887,GO:0006464,GO:0006807,GO:0008150,GO:0008152,GO:0009987,GO:0016020,GO:0016021,GO:0016853,GO:0016859,GO:0018193,GO:0018208,GO:0019538,GO:0031224,GO:0031226,GO:0036211,GO:0040007,GO:0043170,GO:0043412,GO:0044237,GO:0044238,GO:0044260,GO:0044267,GO:0071704,GO:0071944,GO:0140096,GO:1901564	-	COG0652-Peptidyl-prolyl cis-trans isomerase (rotamase) - cyclophilin family[O]
GE00672	13.84	37.73	-1.44687	5.84e-09	2.32e-08	down	GE00672	putative 3-mercaptopyruvate sulfurtransferase	-	K01011-ko00920 Sulfur metabolism;ko00270 Cysteine and methionine metabolism;ko04122 Sulfur relay system	COG2897-Rhodanese-related sulfurtransferase[P]
GE03751	31.98	79.14	-1.30724	6.22e-09	2.47e-08	down	GE03751	hypothetical protein	-	-	-
GE01661	37.58	77.38	-1.042	6.28e-09	2.49e-08	down	GE01661	Citrate lyase subunit beta-like protein	-	K01644-ko02020 Two-component system	COG2301-Citrate lyase beta subunit[G]
GE04194	2.55	19.62	-2.94376	6.72e-09	2.65e-08	down	GE04194	Puromycin N-acetyltransferase	-	-	COG0456-Acetyltransferases[R]
GE04558	52.36	124.9	-1.25424	7.08e-09	2.79e-08	down	GE04558	hypothetical protein	-	-	COG2388-Predicted acetyltransferase[R]
GE00476	8.32	31.69	-1.92937	7.21e-09	2.84e-08	down	GE00476	HTH-type transcriptional repressor FabR	-	-	-
GE03145	3.16	17.41	-2.46192	8.54e-09	3.36e-08	down	GE03145	putative protein Rv3661	GO:0005575,GO:0005622,GO:0005737,GO:0005829	-	COG0560-Phosphoserine phosphatase[E]
GE02884	0.36	6.78	-4.23522	8.7e-09	3.41e-08	down	GE02884	Cytochrome P450 144	-	-	COG2124-Cytochrome P450[Q]
GE02593	1	19.02	-4.24945	8.7e-09	3.41e-08	down	GE02593	Anti-sigma-F factor RsbW	-	-	-
GE03272	2.21	11.64	-2.39697	9.16e-09	3.59e-08	down	GE03272	Aspartokinase	GO:0003674,GO:0003824,GO:0004072,GO:0005575,GO:0005618,GO:0005622,GO:0005737,GO:0005886,GO:0006082,GO:0006520,GO:0006553,GO:0006793,GO:0006796,GO:0006807,GO:0008150,GO:0008152,GO:0008652,GO:0009058,GO:0009066,GO:0009067,GO:0009085,GO:0009089,GO:0009987,GO:0016020,GO:0016053,GO:0016301,GO:0016310,GO:0016740,GO:0016772,GO:0016774,GO:0019202,GO:0019752,GO:0019877,GO:0030312,GO:0040007,GO:0043436,GO:…	K00928-ko01210 2-Oxocarboxylic acid metabolism;ko01230 Biosynthesis of amino acids;ko00260 Glycine, serine and threonine metabolism;ko00270 Cysteine and methionine metabolism;ko00300 Lysine biosynthesis;ko00261 Monobactam biosynthesis	COG0527-Aspartokinases[E]
GE00540	34.32	89.55	-1.38364	9.28e-09	3.63e-08	down	GE00540	hypothetical protein	-	-	-
GE03720	0.66	23.12	-5.13053	9.31e-09	3.64e-08	down	GE03720	Thioredoxin	-	-	COG3118-Thioredoxin domain-containing protein[O]
GE01578	0.44	15.32	-5.12177	9.31e-09	3.64e-08	down	GE01578	hypothetical protein	-	-	-
GE01002	12.1	34.59	-1.51535	1.06e-08	4.14e-08	down	GE01002	hypothetical protein	-	-	-
GE00623	0.0001	9.98	-16.6068	1.16e-08	4.52e-08	down	GE00623	putative metallo-hydrolase YflN	-	-	COG0491-Zn-dependent hydrolases, including glyoxylases[R]
GE00671	3.14	18.99	-2.5964	1.17e-08	4.55e-08	down	GE00671	putative HTH-type transcriptional regulator YdhC	-	-	COG2186-Transcriptional regulators[K]
GE00434	5.92	13.41	-1.17964	1.27e-08	4.92e-08	down	GE00434	Chromosome partition protein Smc	GO:0005575,GO:0005618,GO:0005622,GO:0005737,GO:0005829,GO:0005886,GO:0016020,GO:0030312,GO:0071944	-	COG1196-Chromosome segregation ATPases[D]
GE04737	1.83	24.57	-3.74698	1.55e-08	5.97e-08	down	GE04737	hypothetical protein	-	-	-
GE03729	1.65	7.02	-2.08901	1.56e-08	6.02e-08	down	GE03729	hypothetical protein	-	-	-
GE02105	0.9	7.38	-3.03562	1.58e-08	6.1e-08	down	GE02105	putative MFS-type transporter YhcA	-	-	-
GE00003	42.94	96.26	-1.16461	1.63e-08	6.28e-08	down	GE00003	30S ribosomal protein S9	GO:0000462,GO:0003674,GO:0003676,GO:0003723,GO:0003735,GO:0005198,GO:0005488,GO:0005575,GO:0005622,GO:0005737,GO:0005829,GO:0005840,GO:0005886,GO:0006139,GO:0006364,GO:0006396,GO:0006412,GO:0006518,GO:0006725,GO:0006807,GO:0008150,GO:0008152,GO:0009058,GO:0009059,GO:0009987,GO:0010467,GO:0015935,GO:0016020,GO:0016070,GO:0016072,GO:0019538,GO:0022613,GO:0022626,GO:0022627,GO:0030490,GO:0032991,GO:…	K02996-ko03010 Ribosome	COG0103-Ribosomal protein S9[J]
GE04733	0.13	4.4	-5.08092	1.69e-08	6.5e-08	down	GE04733	High-affinity branched-chain amino acid transport system permease protein LivH	-	-	COG4120-ABC-type uncharacterized transport system, permease component[R]
GE01516	17.33	46.98	-1.43878	1.84e-08	7.07e-08	down	GE01516	Glutamate transport system permease protein GluC	-	K10006-ko02010 ABC transporters	COG0765-ABC-type amino acid transport system, permease component[E]
GE04453	24.76	55.23	-1.15744	1.85e-08	7.09e-08	down	GE04453	hypothetical protein	-	-	-
GE04406	5.89	18.71	-1.66747	1.93e-08	7.38e-08	down	GE04406	Serine protease 2	-	-	-
GE04750	11.72	45.13	-1.94511	2.01e-08	7.67e-08	down	GE04750	hypothetical protein	-	-	-
GE03239	12.78	29.81	-1.22191	2.03e-08	7.77e-08	down	GE03239	Catalase	-	K03781-ko01200 Carbon metabolism;ko00630 Glyoxylate and dicarboxylate metabolism;ko00380 Tryptophan metabolism;ko04011 MAPK signaling pathway - yeast;ko04068 FoxO signaling pathway;ko04146 Peroxisome;ko04211 Longevity regulating pathway - mammal;ko04212 Longevity regulating pathway - worm;ko04213 Longevity regulating pathway - multiple species;ko05014 Amyotrophic lateral sclerosis (ALS)	COG0753-Catalase[P]
GE02163	48.48	105.74	-1.12506	2.05e-08	7.82e-08	down	GE02163	hypothetical protein	-	-	-
GE04214	12.39	36.32	-1.55159	2.14e-08	8.15e-08	down	GE04214	Putative quercetin 2,3-dioxygenase Mb0187c	-	-	COG1741-Pirin-related protein[R]
GE04347	14.87	79.15	-2.41218	2.38e-08	9.04e-08	down	GE04347	hypothetical protein	-	-	-
GE03500	8.35	34.18	-2.0333	2.38e-08	9.04e-08	down	GE03500	HTH-type transcriptional regulator PecS	-	-	-
GE04895	0.76	8.03	-3.40133	2.49e-08	9.43e-08	down	GE04895	Acyl-CoA dehydrogenase	-	-	COG1960-Acyl-CoA dehydrogenases[I]
GE04246	22.35	48.93	-1.13044	2.53e-08	9.57e-08	down	GE04246	4-hydroxy-2-oxovalerate aldolase 2	-	K01666-ko01220 Degradation of aromatic compounds;ko00360 Phenylalanine metabolism;ko00362 Benzoate degradation;ko00622 Xylene degradation;ko00621 Dioxin degradation	COG0119-Isopropylmalate/homocitrate/citramalate synthases[E]
GE00463	6.46	28.55	-2.14388	2.62e-08	9.91e-08	down	GE00463	Oligoribonuclease	GO:0000175,GO:0003674,GO:0003824,GO:0004518,GO:0004527,GO:0004532,GO:0004540,GO:0006139,GO:0006725,GO:0006807,GO:0008150,GO:0008152,GO:0008408,GO:0009987,GO:0016070,GO:0016787,GO:0016788,GO:0016796,GO:0016896,GO:0034641,GO:0040007,GO:0043170,GO:0044237,GO:0044238,GO:0046483,GO:0071704,GO:0090304,GO:0090305,GO:0090501,GO:0090503,GO:0140098,GO:1901360	K13288-ko03008 Ribosome biogenesis in eukaryotes	COG1949-Oligoribonuclease (3'->5' exoribonuclease)[A]
GE03779	2.98	14.05	-2.23719	2.65e-08	9.99e-08	down	GE03779	sn-glycerol-3-phosphate import ATP-binding protein UgpC	-	K10112-ko02010 ABC transporters	COG3839-ABC-type sugar transport systems, ATPase components[G]
GE03331	24.77	68.87	-1.47528	2.72e-08	1.02e-07	down	GE03331	hypothetical protein	-	-	-
GE00904	5.39	43.29	-3.00568	2.79e-08	1.05e-07	down	GE00904	hypothetical protein	-	-	-
GE04735	0.29	9.42	-5.0216	3.08e-08	1.16e-07	down	GE04735	High-affinity branched-chain amino acid transport ATP-binding protein BraF	-	K01995-ko02010 ABC transporters;ko02024 Quorum sensing	COG0411-ABC-type branched-chain amino acid transport systems, ATPase component[E]
GE01289	39.37	80.54	-1.03261	3.1e-08	1.17e-07	down	GE01289	6-phosphogluconolactonase	GO:0003674,GO:0003824,GO:0005575,GO:0005622,GO:0005737,GO:0005886,GO:0006081,GO:0006098,GO:0006139,GO:0006725,GO:0006739,GO:0006753,GO:0006793,GO:0006796,GO:0006807,GO:0008150,GO:0008152,GO:0009051,GO:0009117,GO:0009987,GO:0016020,GO:0016787,GO:0016788,GO:0017057,GO:0019362,GO:0019637,GO:0019682,GO:0019693,GO:0034641,GO:0044237,GO:0044238,GO:0044281,GO:0046483,GO:0046496,GO:0051156,GO:0052689,GO:…	K01057-ko01200 Carbon metabolism;ko00030 Pentose phosphate pathway	COG0363-6-phosphogluconolactonase/Glucosamine-6-phosphate isomerase/deaminase[G]
GE02240	59.17	157.52	-1.4126	3.17e-08	1.19e-07	down	GE02240	putative cold shock protein A	-	-	COG1278-Cold shock proteins[K]
GE01620	2.25	16.25	-2.85244	3.58e-08	1.34e-07	down	GE01620	putative D-methionine transport system permease protein MetI	-	K02072-ko02010 ABC transporters	COG2011-ABC-type metal ion transport system, permease component[P]
GE00918	72.86	178.09	-1.28941	3.59e-08	1.34e-07	down	GE00918	hypothetical protein	-	-	-
GE01310	22.45	55.37	-1.30239	3.6e-08	1.35e-07	down	GE01310	Ribulose-phosphate 3-epimerase	GO:0003674,GO:0003824,GO:0004750,GO:0005488,GO:0005575,GO:0005622,GO:0005737,GO:0005829,GO:0005975,GO:0005996,GO:0006081,GO:0006098,GO:0006139,GO:0006725,GO:0006739,GO:0006753,GO:0006793,GO:0006796,GO:0006807,GO:0008150,GO:0008152,GO:0009052,GO:0009056,GO:0009117,GO:0009987,GO:0016052,GO:0016853,GO:0016854,GO:0016857,GO:0019321,GO:0019323,GO:0019362,GO:0019637,GO:0019682,GO:0019693,GO:0034641,GO:…	K01783-ko01200 Carbon metabolism;ko01230 Biosynthesis of amino acids;ko00030 Pentose phosphate pathway;ko00040 Pentose and glucuronate interconversions;ko00710 Carbon fixation in photosynthetic organisms	COG0036-Pentose-5-phosphate-3-epimerase[G]
GE01962	0.87	7.82	-3.16808	3.64e-08	1.36e-07	down	GE01962	hypothetical protein	-	-	-
GE04261	1.64	9.04	-2.46263	3.7e-08	1.38e-07	down	GE04261	Putative purine-cytosine permease YxlA	-	-	COG1457-Purine-cytosine permease and related proteins[F]
GE03347	8.66	34.93	-2.01203	3.76e-08	1.4e-07	down	GE03347	UPF0145 protein Acel_2109	-	-	COG0393-Uncharacterized conserved protein[S]
GE03528	8.52	28.65	-1.74961	3.85e-08	1.44e-07	down	GE03528	HTH-type transcriptional regulator SkgA	-	-	COG0789-Predicted transcriptional regulators[K]
GE01340	22.55	58.69	-1.37999	3.95e-08	1.47e-07	down	GE01340	Elongation factor P	GO:0003674,GO:0003676,GO:0003723,GO:0003746,GO:0005488,GO:0005575,GO:0005622,GO:0005737,GO:0006412,GO:0006414,GO:0006518,GO:0006807,GO:0008135,GO:0008150,GO:0008152,GO:0009058,GO:0009059,GO:0009987,GO:0010467,GO:0019538,GO:0034641,GO:0034645,GO:0040007,GO:0043043,GO:0043170,GO:0043603,GO:0043604,GO:0044237,GO:0044238,GO:0044249,GO:0044260,GO:0044267,GO:0044271,GO:0071704,GO:0097159,GO:1901363,GO:…	-	COG0231-Translation elongation factor P (EF-P)/translation initiation factor 5A (eIF-5A)[J]
GE01978	12.32	45.45	-1.88328	4.49e-08	1.67e-07	down	GE01978	Alpha-crystallin	GO:0001666,GO:0003674,GO:0005488,GO:0005515,GO:0005575,GO:0005618,GO:0005622,GO:0005737,GO:0005829,GO:0005886,GO:0006457,GO:0006464,GO:0006468,GO:0006793,GO:0006796,GO:0006807,GO:0006950,GO:0007154,GO:0008150,GO:0008152,GO:0009266,GO:0009267,GO:0009408,GO:0009605,GO:0009607,GO:0009628,GO:0009987,GO:0009991,GO:0010035,GO:0010038,GO:0010039,GO:0016020,GO:0016310,GO:0019538,GO:0030312,GO:0031667,GO:…	-	COG0071-Molecular chaperone (small heat shock protein)[O]
GE00185	6.86	19.74	-1.52484	4.5e-08	1.67e-07	down	GE00185	Phosphomannomutase	GO:0000271,GO:0000287,GO:0003674,GO:0003824,GO:0004614,GO:0004615,GO:0005488,GO:0005975,GO:0005976,GO:0006082,GO:0006629,GO:0008150,GO:0008152,GO:0008610,GO:0008653,GO:0009058,GO:0009059,GO:0009103,GO:0009243,GO:0009244,GO:0009311,GO:0009312,GO:0009405,GO:0009987,GO:0016051,GO:0016053,GO:0016853,GO:0016866,GO:0016868,GO:0017144,GO:0019752,GO:0033692,GO:0034637,GO:0034645,GO:0042120,GO:0042121,GO:…	K01840-ko00051 Fructose and mannose metabolism;ko00520 Amino sugar and nucleotide sugar metabolism	COG1109-Phosphomannomutase[G]
GE02610	1.2	7.34	-2.61275	5.06e-08	1.87e-07	down	GE02610	Glutathione-binding protein GsiB (Precursor)	-	K02035-ko02024 Quorum sensing	COG0747-ABC-type dipeptide transport system, periplasmic component[E]
GE02031	9.32	30.67	-1.71843	5.19e-08	1.92e-07	down	GE02031	hypothetical protein	-	-	COG3544-Uncharacterized protein conserved in bacteria[S]
GE04324	32.78	72.37	-1.14258	5.3e-08	1.96e-07	down	GE04324	putative protein Rv0966c	-	-	-
GE04670	10.23	30.38	-1.57032	5.4e-08	1.99e-07	down	GE04670	putative protein Mb0509 (Precursor)	-	-	COG1082-Sugar phosphate isomerases/epimerases[G]
GE02379	1.44	45.1	-4.96899	5.61e-08	2.07e-07	down	GE02379	hypothetical protein	-	-	-
GE03771	1.37	7.85	-2.51852	5.68e-08	2.09e-07	down	GE03771	hypothetical protein	-	-	-
GE00921	7.19	25.4	-1.82076	5.78e-08	2.13e-07	down	GE00921	RNA polymerase sigma factor SigF	-	-	COG1191-DNA-directed RNA polymerase specialized sigma subunit[K]
GE03066	25.77	69.43	-1.42987	5.82e-08	2.14e-07	down	GE03066	Thiocyanate hydrolase subunit beta	-	-	-
GE00152	17.09	45.42	-1.41018	6.07e-08	2.23e-07	down	GE00152	Response regulator ArlR	-	-	COG0745-Response regulators consisting of a CheY-like receiver domain and a winged-helix DNA-binding domain[TK]
GE03392	18.14	40.06	-1.14299	6.24e-08	2.29e-07	down	GE03392	putative acyl-CoA dehydrogenase YngJ	-	K00252-ko00071 Fatty acid degradation;ko00310 Lysine degradation;ko00380 Tryptophan metabolism;ko00362 Benzoate degradation	COG1960-Acyl-CoA dehydrogenases[I]
GE04245	29.88	61.11	-1.03223	6.28e-08	2.3e-07	down	GE04245	Acetaldehyde dehydrogenase 2	-	K04073-ko01220 Degradation of aromatic compounds;ko00620 Pyruvate metabolism;ko00650 Butanoate metabolism;ko00360 Phenylalanine metabolism;ko00362 Benzoate degradation;ko00622 Xylene degradation;ko00621 Dioxin degradation	COG4569-Acetaldehyde dehydrogenase (acetylating)[Q]
GE02418	2.23	19.51	-3.1291	6.48e-08	2.37e-07	down	GE02418	Dihydrofolate reductase	GO:0000166,GO:0003674,GO:0003824,GO:0004146,GO:0005488,GO:0006082,GO:0006575,GO:0006725,GO:0006730,GO:0006760,GO:0006807,GO:0008150,GO:0008152,GO:0009058,GO:0009396,GO:0009987,GO:0016053,GO:0016491,GO:0016645,GO:0016646,GO:0018130,GO:0019438,GO:0019752,GO:0034641,GO:0036094,GO:0042398,GO:0042558,GO:0042559,GO:0043167,GO:0043168,GO:0043436,GO:0043603,GO:0043604,GO:0044237,GO:0044249,GO:0044271,GO:…	K00287-ko00790 Folate biosynthesis;ko00670 One carbon pool by folate	COG0262-Dihydrofolate reductase[H]
GE04834	20.36	54.27	-1.41442	7.07e-08	2.58e-07	down	GE04834	hypothetical protein	-	-	-
GE02438	13.45	36.5	-1.44029	7.87e-08	2.87e-07	down	GE02438	Linocin-M18	-	-	COG1659-Uncharacterized protein, linocin/CFP29 homolog[S]
GE04216	5.8	14.14	-1.28566	7.98e-08	2.91e-07	down	GE04216	Nitrate/nitrite response regulator protein-like protein	-	-	COG2771-DNA-binding HTH domain-containing proteins[K]
GE00087	6.69	23.05	-1.78469	7.99e-08	2.91e-07	down	GE00087	Methenyltetrahydrofolate cyclohydrolase	GO:0003674,GO:0003824,GO:0004477,GO:0004488,GO:0005575,GO:0005576,GO:0005622,GO:0005737,GO:0005829,GO:0005886,GO:0006730,GO:0008150,GO:0008152,GO:0009987,GO:0016020,GO:0016491,GO:0016645,GO:0016646,GO:0016787,GO:0016810,GO:0016814,GO:0019238,GO:0040007,GO:0044237,GO:0044281,GO:0055114,GO:0071944	K01491-ko01200 Carbon metabolism;ko00720 Carbon fixation pathways in prokaryotes;ko00670 One carbon pool by folate	COG0190-5,10-methylene-tetrahydrofolate dehydrogenase/Methenyl tetrahydrofolate cyclohydrolase[H]
GE00045	25.18	78.88	-1.64738	8.06e-08	2.93e-07	down	GE00045	putative transcriptional regulator WhiB3	-	-	-
GE04226	20.46	46.96	-1.19863	8.1e-08	2.94e-07	down	GE04226	AB hydrolase superfamily protein YisY	-	-	COG2267-Lysophospholipase[I]
GE01348	5.79	17.14	-1.56573	9.02e-08	3.27e-07	down	GE01348	UPF0755 protein HI_0457	-	-	COG1559-Predicted periplasmic solute-binding protein[R]
GE02800	10.07	28.47	-1.49938	9.35e-08	3.39e-07	down	GE02800	hypothetical protein	-	-	-
GE00136	2.64	14.81	-2.48796	9.56e-08	3.46e-07	down	GE00136	Putative tyrosine-protein phosphatase H16_A0669 (Precursor)	-	-	COG2365-Protein tyrosine/serine phosphatase[T]
GE01564	13.11	46.44	-1.8247	9.72e-08	3.52e-07	down	GE01564	hypothetical protein	-	-	-
GE00579	5.07	20.36	-2.00568	9.86e-08	3.56e-07	down	GE00579	Sulfate transport system permease protein CysW	-	K02047-ko00920 Sulfur metabolism;ko02010 ABC transporters	COG4208-ABC-type sulfate transport system, permease component[P]
GE04182	1.6	48.32	-4.91648	1.02e-07	3.7e-07	down	GE04182	hypothetical protein	-	-	-
GE00462	0.0001	53.69	-19.0343	1.03e-07	3.71e-07	down	GE00462	hypothetical protein	-	-	-
GE03192	2.53	13.42	-2.40718	1.03e-07	3.72e-07	down	GE03192	AB hydrolase superfamily protein YfhM	-	-	COG0596-Predicted hydrolases or acyltransferases (alpha/beta hydrolase superfamily) [R]
GE00792	5.8	19.5	-1.74935	1.09e-07	3.92e-07	down	GE00792	Alcohol dehydrogenase	-	K13953-ko01220 Degradation of aromatic compounds;ko00010 Glycolysis / Gluconeogenesis;ko00071 Fatty acid degradation;ko00350 Tyrosine metabolism;ko00830 Retinol metabolism;ko00625 Chloroalkane and chloroalkene degradation;ko00626 Naphthalene degradation;ko00980 Metabolism of xenobiotics by cytochrome P450;ko00982 Drug metabolism - cytochrome P450	COG1064-Zn-dependent alcohol dehydrogenases[R]
GE03853	40.26	99.28	-1.30216	1.1e-07	3.96e-07	down	GE03853	hypothetical protein	-	-	-
GE02861	2.89	13.96	-2.27216	1.12e-07	4.02e-07	down	GE02861	Phosphoribosylaminoimidazole-succinocarboxamide synthase	GO:0003674,GO:0003824,GO:0004639,GO:0005575,GO:0005622,GO:0005737,GO:0006139,GO:0006163,GO:0006164,GO:0006188,GO:0006189,GO:0006725,GO:0006753,GO:0006793,GO:0006796,GO:0006807,GO:0008150,GO:0008152,GO:0009058,GO:0009117,GO:0009123,GO:0009124,GO:0009126,GO:0009127,GO:0009150,GO:0009152,GO:0009156,GO:0009161,GO:0009165,GO:0009167,GO:0009168,GO:0009259,GO:0009260,GO:0009987,GO:0016874,GO:0016879,GO:…	K01923-ko00230 Purine metabolism	COG0152-Phosphoribosylaminoimidazolesuccinocarboxamide (SAICAR) synthase[F]
GE03088	31.2	63.05	-1.01495	1.14e-07	4.09e-07	down	GE03088	hypothetical protein	-	-	-
GE02517	11.32	32.98	-1.54272	1.14e-07	4.1e-07	down	GE02517	hypothetical protein	-	-	COG4912-Predicted DNA alkylation repair enzyme[L]
GE00959	26.94	67.95	-1.33472	1.28e-07	4.57e-07	down	GE00959	hypothetical protein	-	-	-
GE03283	4.75	29.95	-2.65656	1.28e-07	4.59e-07	down	GE03283	hypothetical protein	-	-	-
GE01816	6.7	19.65	-1.5523	1.31e-07	4.7e-07	down	GE01816	Acetamidase	-	K01455-ko01200 Carbon metabolism;ko00630 Glyoxylate and dicarboxylate metabolism;ko00910 Nitrogen metabolism;ko00460 Cyanoamino acid metabolism	COG2421-Predicted acetamidase/formamidase[C]
GE02891	21.94	45.29	-1.04563	1.32e-07	4.7e-07	down	GE02891	Aspartate aminotransferase	-	-	COG0436-Aspartate/tyrosine/aromatic aminotransferase[E]
GE04692	14.81	57.29	-1.95171	1.46e-07	5.21e-07	down	GE04692	Copper-sensing transcriptional repressor CsoR	-	-	COG1937-Uncharacterized protein conserved in bacteria[S]
GE00210	9.93	25.08	-1.33667	1.5e-07	5.34e-07	down	GE00210	NADH oxidase	-	-	COG1902-NADH:flavin oxidoreductases, Old Yellow Enzyme family[C]
GE00313	46.62	116.52	-1.32156	1.51e-07	5.38e-07	down	GE00313	hypothetical protein	-	K03636-ko00790 Folate biosynthesis;ko04122 Sulfur relay system	-
GE01107	1.26	9.42	-2.9023	1.51e-07	5.4e-07	down	GE01107	Tyrosine recombinase XerC	-	-	COG4973-Site-specific recombinase XerC[L]
GE00089	10.53	26.99	-1.35792	1.72e-07	6.13e-07	down	GE00089	Homoserine O-acetyltransferase	GO:0000096,GO:0000097,GO:0003674,GO:0003824,GO:0004414,GO:0005575,GO:0005886,GO:0006082,GO:0006520,GO:0006555,GO:0006790,GO:0006807,GO:0008150,GO:0008152,GO:0008374,GO:0008652,GO:0009058,GO:0009066,GO:0009067,GO:0009069,GO:0009086,GO:0009092,GO:0009987,GO:0016020,GO:0016053,GO:0016407,GO:0016413,GO:0016740,GO:0016746,GO:0016747,GO:0019752,GO:0040007,GO:0043436,GO:0044237,GO:0044238,GO:0044249,GO:…	K00641-ko00270 Cysteine and methionine metabolism	COG2021-Homoserine acetyltransferase[E]
GE02198	20.71	44.56	-1.10542	1.81e-07	6.41e-07	down	GE02198	Fructose-1,6-bisphosphatase class 2	GO:0000287,GO:0003674,GO:0003824,GO:0005488,GO:0005575,GO:0005622,GO:0005737,GO:0005829,GO:0005975,GO:0005996,GO:0006006,GO:0006094,GO:0006793,GO:0006796,GO:0008150,GO:0008152,GO:0009058,GO:0009987,GO:0016051,GO:0016311,GO:0016787,GO:0016788,GO:0016791,GO:0019203,GO:0019318,GO:0019319,GO:0019637,GO:0030145,GO:0030388,GO:0042132,GO:0042578,GO:0043167,GO:0043169,GO:0044237,GO:0044238,GO:0044281,GO:…	K02446-ko01200 Carbon metabolism;ko00010 Glycolysis / Gluconeogenesis;ko00030 Pentose phosphate pathway;ko00051 Fructose and mannose metabolism;ko00710 Carbon fixation in photosynthetic organisms;ko00680 Methane metabolism	COG1494-Fructose-1,6-bisphosphatase/sedoheptulose 1,7-bisphosphatase and related proteins[G]
GE04240	13.68	31.44	-1.20053	1.83e-07	6.49e-07	down	GE04240	Acyl-CoA dehydrogenase	-	-	COG1960-Acyl-CoA dehydrogenases[I]
GE00994	3.19	14.57	-2.19137	1.84e-07	6.52e-07	down	GE00994	Inner membrane amino-acid ABC transporter permease protein YecS	-	-	COG4160-ABC-type arginine/histidine transport system, permease component[E]
GE03458	11.26	24.96	-1.14841	2.04e-07	7.22e-07	down	GE03458	Endonuclease YhcR (Precursor)	-	K01081-ko00230 Purine metabolism;ko00240 Pyrimidine metabolism;ko00760 Nicotinate and nicotinamide metabolism	COG0737-5'-nucleotidase/2',3'-cyclic phosphodiesterase and related esterases[F]
GE04191	1.25	10.35	-3.04963	2.04e-07	7.23e-07	down	GE04191	UPF0336 protein Tfu_2666	-	-	COG2030-Acyl dehydratase[I]
GE03691	9.15	26.01	-1.50722	2.08e-07	7.33e-07	down	GE03691	Rhomboid protease GluP	-	-	COG0705-Uncharacterized membrane protein (homolog of Drosophila rhomboid)[R]
GE02324	139.97	290.21	-1.05198	2.42e-07	8.53e-07	down	GE02324	hypothetical protein	-	-	-
GE04702	6.04	23.52	-1.96127	2.44e-07	8.57e-07	down	GE04702	putative protein Rv0525	GO:0005575,GO:0005886,GO:0008150,GO:0016020,GO:0040007,GO:0071944	-	COG0406-Fructose-2,6-bisphosphatase[G]
GE01129	2.51	9.77	-1.96067	2.44e-07	8.57e-07	down	GE01129	Apolipoprotein N-acyltransferase	GO:0000030,GO:0003674,GO:0003824,GO:0004582,GO:0005575,GO:0005618,GO:0005622,GO:0005737,GO:0005829,GO:0005886,GO:0006629,GO:0006643,GO:0006664,GO:0008150,GO:0008152,GO:0008610,GO:0009058,GO:0009247,GO:0009605,GO:0009607,GO:0009987,GO:0016020,GO:0016740,GO:0016757,GO:0016758,GO:0030312,GO:0035821,GO:0043207,GO:0044003,GO:0044237,GO:0044238,GO:0044249,GO:0044255,GO:0044403,GO:0044419,GO:0046467,GO:…	-	COG0815-Apolipoprotein N-acyltransferase[M]
GE02581	14.37	30.12	-1.06766	2.47e-07	8.69e-07	down	GE02581	Phytoene dehydrogenase	-	K10027-ko00906 Carotenoid biosynthesis	COG1233-Phytoene dehydrogenase and related proteins[Q]
GE02938	21.59	44.13	-1.0314	2.58e-07	9.06e-07	down	GE02938	putative acyl-CoA dehydrogenase YngJ	-	-	COG1960-Acyl-CoA dehydrogenases[I]
GE00830	10.52	29.46	-1.48562	2.58e-07	9.06e-07	down	GE00830	Nicotinate-nucleotide pyrophosphorylase	GO:0003674,GO:0003824,GO:0004514,GO:0005575,GO:0005618,GO:0005622,GO:0005737,GO:0005886,GO:0006082,GO:0006139,GO:0006725,GO:0006753,GO:0006793,GO:0006796,GO:0006807,GO:0008150,GO:0008152,GO:0009056,GO:0009058,GO:0009117,GO:0009165,GO:0009435,GO:0009987,GO:0016020,GO:0016054,GO:0016740,GO:0016757,GO:0016763,GO:0017144,GO:0018130,GO:0019359,GO:0019362,GO:0019363,GO:0019438,GO:0019637,GO:0019674,GO:…	K00767-ko00760 Nicotinate and nicotinamide metabolism	COG0157-Nicotinate-nucleotide pyrophosphorylase[H]
GE04189	1.81	9.74	-2.42793	2.69e-07	9.43e-07	down	GE04189	Beta-ketoadipyl-CoA thiolase	GO:0003674,GO:0003676,GO:0003723,GO:0003729,GO:0003824,GO:0003988,GO:0005488,GO:0005575,GO:0005622,GO:0005737,GO:0005739,GO:0005740,GO:0005758,GO:0005777,GO:0005782,GO:0006082,GO:0006629,GO:0006631,GO:0006635,GO:0008150,GO:0008152,GO:0009056,GO:0009062,GO:0009987,GO:0016042,GO:0016054,GO:0016408,GO:0016740,GO:0016746,GO:0016747,GO:0019395,GO:0019752,GO:0030258,GO:0031907,GO:0031967,GO:0031970,GO:…	K00632-ko01212 Fatty acid metabolism;ko00071 Fatty acid degradation;ko00592 alpha-Linolenic acid metabolism;ko00280 Valine, leucine and isoleucine degradation;ko00281 Geraniol degradation;ko00362 Benzoate degradation;ko00642 Ethylbenzene degradation	COG0183-Acetyl-CoA acetyltransferase[I]
GE02332	6.48	33.01	-2.34884	2.85e-07	9.96e-07	down	GE02332	Arsenate reductase	-	-	COG1393-Arsenate reductase and related proteins, glutaredoxin family[P]
GE03596	4.05	20.65	-2.35015	2.85e-07	9.96e-07	down	GE03596	hypothetical protein	-	-	-
GE04035	1.76	8.95	-2.34631	2.85e-07	9.96e-07	down	GE04035	Baeyer-Villiger monooxygenase	-	-	COG2072-Predicted flavoprotein involved in K+ transport[P]
GE01411	15.46	37.34	-1.27218	2.85e-07	9.96e-07	down	GE01411	Phosphatidylinositol mannoside acyltransferase	GO:0003674,GO:0003824,GO:0005575,GO:0006629,GO:0006643,GO:0006664,GO:0008150,GO:0008152,GO:0008610,GO:0009058,GO:0009247,GO:0009987,GO:0016020,GO:0016740,GO:0016746,GO:0040007,GO:0044237,GO:0044238,GO:0044249,GO:0044255,GO:0046467,GO:0071704,GO:1901135,GO:1901137,GO:1901576,GO:1903509	-	COG1560-Lauroyl/myristoyl acyltransferase[M]
GE03493	1.36	6.6	-2.27886	2.95e-07	1.03e-06	down	GE03493	Adenylyl-sulfate kinase	-	K00955-ko00920 Sulfur metabolism;ko00230 Purine metabolism;ko00450 Selenocompound metabolism;ko00261 Monobactam biosynthesis	COG2895-GTPases - Sulfate adenylate transferase subunit 1[P]
GE02222	8.9	39.91	-2.16487	2.98e-07	1.04e-06	down	GE02222	hypothetical protein	-	-	-
GE02468	1.61	7.51	-2.22175	2.99e-07	1.04e-06	down	GE02468	putative protein Mb2937c	-	-	COG3653-N-acyl-D-aspartate/D-glutamate deacylase[Q]
GE02098	15.31	71.29	-2.21923	2.99e-07	1.04e-06	down	GE02098	hypothetical protein	-	-	-
GE03083	1.1	12.8	-3.54057	3.11e-07	1.08e-06	down	GE03083	hypothetical protein	-	-	-
GE04805	2.4	15.72	-2.71149	3.23e-07	1.12e-06	down	GE04805	putative protein in mobD 3'region	-	-	COG1357-Uncharacterized low-complexity proteins[S]
GE00674	1.36	8.92	-2.71344	3.23e-07	1.12e-06	down	GE00674	Alkanesulfonate monooxygenase	-	K04091-ko00920 Sulfur metabolism	-
GE03642	52.61	114.15	-1.11752	3.26e-07	1.13e-06	down	GE03642	putative protein Rv2742A	-	-	-
GE01410	16.43	36.41	-1.148	3.33e-07	1.15e-06	down	GE01410	GDP-mannose-dependent alpha-(1-2)-phosphatidylinositol mannosyltransferase	GO:0000026,GO:0000030,GO:0000287,GO:0003674,GO:0003824,GO:0004376,GO:0004377,GO:0005488,GO:0005575,GO:0005886,GO:0006629,GO:0006643,GO:0006644,GO:0006650,GO:0006664,GO:0006793,GO:0006796,GO:0008150,GO:0008152,GO:0008610,GO:0009058,GO:0009247,GO:0009987,GO:0016020,GO:0016740,GO:0016757,GO:0016758,GO:0019637,GO:0043167,GO:0043169,GO:0043750,GO:0044237,GO:0044238,GO:0044249,GO:0044255,GO:0046467,GO:…	-	COG0438-Glycosyltransferase[M]
GE00620	1.73	27.17	-3.97317	3.37e-07	1.17e-06	down	GE00620	hypothetical protein	-	-	-
GE04053	7.77	29.17	-1.9085	3.54e-07	1.22e-06	down	GE04053	Ribonuclease H	GO:0003674,GO:0003824,GO:0004518,GO:0004519,GO:0004521,GO:0004523,GO:0004540,GO:0006139,GO:0006259,GO:0006260,GO:0006261,GO:0006271,GO:0006273,GO:0006401,GO:0006725,GO:0006807,GO:0008150,GO:0008152,GO:0009056,GO:0009057,GO:0009058,GO:0009059,GO:0009987,GO:0016070,GO:0016787,GO:0016788,GO:0016891,GO:0016893,GO:0019439,GO:0022616,GO:0033567,GO:0034641,GO:0034645,GO:0034655,GO:0043137,GO:0043170,GO:…	K03469-ko03030 DNA replication	COG0328-Ribonuclease HI[L]
GE03428	8.07	25.34	-1.65078	4.33e-07	1.49e-06	down	GE03428	hypothetical protein	-	-	-
GE01254	3.52	14.53	-2.04539	4.52e-07	1.55e-06	down	GE01254	UPF0353 protein NFA_34780	-	-	COG2304-Uncharacterized protein containing a von Willebrand factor type A (vWA) domain[R]
GE03650	50.38	127.61	-1.34082	4.59e-07	1.58e-06	down	GE03650	putative protein YaaA	-	-	COG2501-Uncharacterized conserved protein[S]
GE02435	2.89	20.54	-2.82929	4.63e-07	1.59e-06	down	GE02435	HTH-type transcriptional repressor NsrR	-	-	COG1959-Predicted transcriptional regulator[K]
GE04741	35.41	74.05	-1.06434	4.73e-07	1.62e-06	down	GE04741	Putative phosphoribosyl transferase Rv0571c	-	-	-
GE01720	16.84	43.93	-1.38331	5.16e-07	1.76e-06	down	GE01720	Endonuclease NucS	-	-	COG1637-Predicted nuclease of the RecB family[L]
GE01519	13.75	37.12	-1.43277	5.58e-07	1.91e-06	down	GE01519	Regulatory protein RecX	GO:0005575,GO:0005886,GO:0016020,GO:0071944	-	COG2137-Uncharacterized protein conserved in bacteria[R]
GE01049	4.4	16.63	-1.91821	5.95e-07	2.03e-06	down	GE01049	putative protein Rv1708	GO:0005575,GO:0005622,GO:0005886,GO:0008150,GO:0009295,GO:0016020,GO:0040007,GO:0043226,GO:0043228,GO:0043229,GO:0043232,GO:0043590,GO:0071944	-	COG1192-ATPases involved in chromosome partitioning[D]
GE03794	20.73	47.43	-1.19408	6.56e-07	2.23e-06	down	GE03794	putative oxidoreductase Rv0945	-	-	COG0300-Short-chain dehydrogenases of various substrate specificities[R]
GE04528	3.08	12.17	-1.98233	6.79e-07	2.31e-06	down	GE04528	Acetate kinase	GO:0005575,GO:0005622,GO:0005737	K00925-ko01200 Carbon metabolism;ko00620 Pyruvate metabolism;ko00640 Propanoate metabolism;ko00720 Carbon fixation pathways in prokaryotes;ko00680 Methane metabolism;ko00430 Taurine and hypotaurine metabolism	COG0282-Acetate kinase[C]
GE00913	22.78	74.65	-1.71237	7.02e-07	2.38e-06	down	GE00913	hypothetical protein	-	-	-
GE03097	10.1	33.09	-1.71204	7.02e-07	2.38e-06	down	GE03097	Hypoxanthine-guanine phosphoribosyltransferase	GO:0003674,GO:0003824,GO:0004422,GO:0006139,GO:0006163,GO:0006164,GO:0006177,GO:0006188,GO:0006725,GO:0006753,GO:0006793,GO:0006796,GO:0006807,GO:0008150,GO:0008152,GO:0009058,GO:0009116,GO:0009117,GO:0009119,GO:0009123,GO:0009124,GO:0009126,GO:0009127,GO:0009150,GO:0009152,GO:0009156,GO:0009161,GO:0009163,GO:0009165,GO:0009167,GO:0009168,GO:0009259,GO:0009260,GO:0009987,GO:0016740,GO:0016757,GO:…	K00760-ko00230 Purine metabolism;ko00983 Drug metabolism - other enzymes	COG0634-Hypoxanthine-guanine phosphoribosyltransferase[F]
GE01570	21.79	57.15	-1.39109	7.04e-07	2.38e-06	down	GE01570	Ribosome-binding factor A	-	-	COG0858-Ribosome-binding factor A[J]
GE00054	28.57	83.28	-1.54347	7.05e-07	2.38e-06	down	GE00054	hypothetical protein	-	-	-
GE01791	9.42	38.29	-2.02317	7.17e-07	2.42e-06	down	GE01791	hypothetical protein	-	-	-
GE03582	4.47	18.18	-2.02401	7.17e-07	2.42e-06	down	GE03582	HTH-type transcriptional repressor KstR2	-	-	COG1309-Transcriptional regulator[K]
GE03340	11.17	22.78	-1.02814	7.22e-07	2.44e-06	down	GE03340	3-hydroxyacyl-CoA dehydrogenase	-	K01782-ko01200 Carbon metabolism;ko01212 Fatty acid metabolism;ko00640 Propanoate metabolism;ko00650 Butanoate metabolism;ko00071 Fatty acid degradation;ko01040 Biosynthesis of unsaturated fatty acids;ko00280 Valine, leucine and isoleucine degradation;ko00310 Lysine degradation;ko00380 Tryptophan metabolism;ko00410 beta-Alanine metabolism;ko00903 Limonene and pinene degradation;ko00281 Geraniol d…	COG1250-3-hydroxyacyl-CoA dehydrogenase[I]
GE02112	9.45	22.53	-1.25346	7.37e-07	2.48e-06	down	GE02112	Fumarate reductase flavoprotein subunit (Precursor)	-	-	-
GE00739	24.45	49.52	-1.01818	7.41e-07	2.49e-06	down	GE00739	Ribosomal RNA small subunit methyltransferase H	GO:0000154,GO:0001510,GO:0003674,GO:0003824,GO:0005575,GO:0005622,GO:0005737,GO:0005886,GO:0006139,GO:0006364,GO:0006396,GO:0006725,GO:0006807,GO:0008150,GO:0008152,GO:0008168,GO:0008170,GO:0008173,GO:0008649,GO:0008757,GO:0009451,GO:0009987,GO:0010467,GO:0016020,GO:0016070,GO:0016072,GO:0016434,GO:0016740,GO:0016741,GO:0022613,GO:0031167,GO:0032259,GO:0034470,GO:0034641,GO:0034660,GO:0040007,GO:…	-	COG0275-Predicted S-adenosylmethionine-dependent methyltransferase involved in cell envelope biogenesis[M]
GE04322	9.3	22.4	-1.2682	7.46e-07	2.51e-06	down	GE04322	putative protein Mb1352c	-	K01768-ko00230 Purine metabolism;ko04113 Meiosis - yeast;ko04213 Longevity regulating pathway - multiple species	COG2114-Adenylate cyclase, family 3 (some proteins contain HAMP domain)[T]
GE03711	12.21	30.72	-1.33112	7.48e-07	2.52e-06	down	GE03711	Membrane protein insertase YidC	GO:0005575,GO:0005886,GO:0005887,GO:0008150,GO:0016020,GO:0016021,GO:0031224,GO:0031226,GO:0040007,GO:0071944	K03217-ko03060 Protein export;ko03070 Bacterial secretion system;ko02024 Quorum sensing	COG0706-Preprotein translocase subunit YidC[U]
GE02309	10.26	52.92	-2.36678	7.48e-07	2.51e-06	down	GE02309	COP-associated protein	-	-	COG2608-Copper chaperone[P]
GE01871	1.85	8.29	-2.16385	7.88e-07	2.64e-06	down	GE01871	Lactate utilization protein B	-	-	COG1139-Uncharacterized conserved protein containing a ferredoxin-like domain[C]
GE00554	2.57	17.74	-2.78717	8.05e-07	2.7e-06	down	GE00554	putative N-acetyltransferase YjaB	-	-	COG0456-Acetyltransferases[R]
GE02545	2.75	18.98	-2.78698	8.05e-07	2.7e-06	down	GE02545	putative HTH-type transcriptional regulator Mb0904	-	-	COG1846-Transcriptional regulators[K]
GE02814	1.03	9.27	-3.16993	8.39e-07	2.81e-06	down	GE02814	Putative thiosulfate sulfurtransferase	GO:0005575,GO:0005618,GO:0005622,GO:0005737,GO:0005829,GO:0005886,GO:0016020,GO:0030312,GO:0071944	K01011-ko00920 Sulfur metabolism;ko00270 Cysteine and methionine metabolism;ko04122 Sulfur relay system	COG2897-Rhodanese-related sulfurtransferase[P]
GE02085	15.88	35.15	-1.14631	8.9e-07	2.97e-06	down	GE02085	LL-diaminopimelate aminotransferase	-	-	COG0436-Aspartate/tyrosine/aromatic aminotransferase[E]
GE02356	13.49	36.22	-1.4249	9.22e-07	3.08e-06	down	GE02356	Response regulator MprA	GO:0000160,GO:0003674,GO:0003676,GO:0003677,GO:0005488,GO:0005575,GO:0005618,GO:0005886,GO:0006355,GO:0007154,GO:0007165,GO:0008150,GO:0009268,GO:0009628,GO:0009889,GO:0009890,GO:0009891,GO:0009892,GO:0009893,GO:0009987,GO:0010446,GO:0010468,GO:0010556,GO:0010557,GO:0010558,GO:0010604,GO:0010605,GO:0010628,GO:0010629,GO:0016020,GO:0019219,GO:0019222,GO:0023052,GO:0030312,GO:0031323,GO:0031324,GO:…	K07669-ko02020 Two-component system	COG0745-Response regulators consisting of a CheY-like receiver domain and a winged-helix DNA-binding domain[TK]
GE03112	31.38	72.38	-1.20575	9.37e-07	3.12e-06	down	GE03112	Proline--tRNA ligase	-	-	COG2606-Uncharacterized conserved protein[S]
GE02175	1.66	10.36	-2.64177	9.56e-07	3.18e-06	down	GE02175	hypothetical protein	-	-	-
GE00743	13.89	29.07	-1.06548	9.6e-07	3.19e-06	down	GE00743	UDP-N-acetylmuramoyl-tripeptide--D-alanyl-D- alanine ligase	GO:0008150,GO:0040007	K01929-ko00300 Lysine biosynthesis;ko00550 Peptidoglycan biosynthesis;ko01502 Vancomycin resistance	COG0770-UDP-N-acetylmuramyl pentapeptide synthase[M]
GE04502	11.06	25.95	-1.23038	9.85e-07	3.27e-06	down	GE04502	putative transcriptional regulatory protein YxjL	-	-	COG2771-DNA-binding HTH domain-containing proteins[K]
GE00170	0.71	7.63	-3.42579	1.03e-06	3.41e-06	down	GE00170	hypothetical protein	-	-	-
GE00822	2.63	28.48	-3.43681	1.03e-06	3.41e-06	down	GE00822	putative protein Mb1616	GO:0002682,GO:0002684,GO:0008150,GO:0009605,GO:0009607,GO:0035821,GO:0043207,GO:0044003,GO:0044403,GO:0044419,GO:0048518,GO:0048583,GO:0048584,GO:0050776,GO:0050778,GO:0050789,GO:0050896,GO:0051701,GO:0051704,GO:0051707,GO:0051817,GO:0052031,GO:0052173,GO:0052200,GO:0052553,GO:0052572,GO:0065007,GO:0075136	-	-
GE03710	1.91	20.67	-3.43589	1.03e-06	3.41e-06	down	GE03710	Putative membrane protein insertion efficiency factor	-	-	COG0759-Uncharacterized conserved protein[S]
GE01521	8.84	50.8	-2.52271	1.08e-06	3.58e-06	down	GE01521	hypothetical protein	-	-	-
GE02200	11.21	38.84	-1.79276	1.08e-06	3.58e-06	down	GE02200	Epoxide hydrolase EphG	GO:0003674,GO:0003824,GO:0004301,GO:0005575,GO:0005886,GO:0008150,GO:0008152,GO:0009987,GO:0016020,GO:0016787,GO:0016801,GO:0016803,GO:0018904,GO:0033963,GO:0044237,GO:0044281,GO:0046483,GO:0071704,GO:0071944,GO:0097176,GO:1901360	K10533-ko00903 Limonene and pinene degradation	COG4308-Limonene-1,2-epoxide hydrolase[Q]
GE01505	0.66	5.08	-2.94429	1.13e-06	3.72e-06	down	GE01505	hypothetical protein	-	-	-
GE01014	2.85	21.73	-2.93065	1.13e-06	3.72e-06	down	GE01014	hypothetical protein	-	-	-
GE01751	3.01	7.85	-1.38293	1.16e-06	3.81e-06	down	GE01751	putative arabinosyltransferase C	-	-	-
GE01424	6.7	18.5	-1.46529	1.18e-06	3.9e-06	down	GE01424	hypothetical protein	GO:0008150,GO:0040007	-	-
GE01294	13.11	42.91	-1.71065	1.18e-06	3.9e-06	down	GE01294	Putative pyridoxine/pyridoxamine 5'-phosphate oxidase	-	-	-
GE01308	17.61	44.61	-1.34097	1.21e-06	3.96e-06	down	GE01308	Riboflavin synthase	GO:0003674,GO:0003824,GO:0004746,GO:0005575,GO:0005622,GO:0005737,GO:0005829,GO:0006766,GO:0006767,GO:0006771,GO:0006807,GO:0008150,GO:0008152,GO:0009058,GO:0009110,GO:0009231,GO:0009987,GO:0016740,GO:0016765,GO:0017144,GO:0018130,GO:0034641,GO:0042364,GO:0042726,GO:0042727,GO:0044237,GO:0044249,GO:0044271,GO:0044281,GO:0044283,GO:0046483,GO:0071704,GO:1901360,GO:1901362,GO:1901564,GO:1901566,GO:…	K00793-ko00740 Riboflavin metabolism	COG0307-Riboflavin synthase alpha chain[H]
GE01218	12.12	29.6	-1.28821	1.22e-06	4.01e-06	down	GE01218	hypothetical protein	-	-	-
GE02874	2.54	10.81	-2.08947	1.24e-06	4.07e-06	down	GE02874	Rhodocoxin reductase	GO:0003674,GO:0003824,GO:0005575,GO:0005622,GO:0005634,GO:0005737,GO:0005739,GO:0005740,GO:0005743,GO:0005758,GO:0005829,GO:0006323,GO:0006915,GO:0006919,GO:0006950,GO:0006996,GO:0007005,GO:0007154,GO:0007165,GO:0007275,GO:0007399,GO:0008150,GO:0008152,GO:0008219,GO:0009893,GO:0009987,GO:0010257,GO:0010604,GO:0010941,GO:0010942,GO:0010950,GO:0010952,GO:0012501,GO:0016020,GO:0016043,GO:0016174,GO:…	-	COG1251-NAD(P)H-nitrite reductase[C]
GE02989	12.42	28.46	-1.19627	1.26e-06	4.14e-06	down	GE02989	Putative cytochrome P450 142	GO:0003674,GO:0003824,GO:0004497,GO:0005488,GO:0005575,GO:0005618,GO:0006066,GO:0006629,GO:0006706,GO:0006707,GO:0008150,GO:0008152,GO:0008202,GO:0008203,GO:0008395,GO:0009056,GO:0016042,GO:0016125,GO:0016127,GO:0016491,GO:0016705,GO:0016709,GO:0020037,GO:0030312,GO:0031073,GO:0036199,GO:0044238,GO:0044281,GO:0044282,GO:0046164,GO:0046906,GO:0055114,GO:0071704,GO:0071944,GO:0097159,GO:1901360,GO:…	K16046-ko00984 Steroid degradation	COG2124-Cytochrome P450[Q]
GE02465	5.49	26.29	-2.25964	1.28e-06	4.19e-06	down	GE02465	Toxin Rv0910	GO:0005575,GO:0005886,GO:0016020,GO:0071944	-	-
GE03330	8.62	39.46	-2.19463	1.29e-06	4.21e-06	down	GE03330	Nucleoid-associated protein RHA1_ro04210	GO:0005575,GO:0005886,GO:0016020,GO:0071944	-	COG0718-Uncharacterized protein conserved in bacteria[S]
GE02492	20.86	45.61	-1.12861	1.33e-06	4.34e-06	down	GE02492	putative oxidoreductase MSMEG_2408/MSMEI_2347	GO:0005575,GO:0005618,GO:0005886,GO:0008150,GO:0016020,GO:0030312,GO:0040007,GO:0071944	-	COG0656-Aldo/keto reductases, related to diketogulonate reductase[R]
GE02840	8.55	19.91	-1.2195	1.33e-06	4.36e-06	down	GE02840	Sensor protein CitS	-	-	COG3290-Signal transduction histidine kinase regulating citrate/malate metabolism[T]
GE01500	19.84	51.88	-1.38677	1.35e-06	4.41e-06	down	GE01500	Transcriptional repressor NrdR	GO:0005575,GO:0005622,GO:0005737,GO:0005829	-	COG1327-Predicted transcriptional regulator, consists of a Zn-ribbon and ATP-cone domains[K]
GE03294	14.19	36.55	-1.365	1.39e-06	4.52e-06	down	GE03294	Cobyric acid synthase	-	-	COG3442-Predicted glutamine amidotransferase[R]
GE04436	1.11	7.46	-2.74862	1.4e-06	4.55e-06	down	GE04436	3-ketosteroid-9-alpha-monooxygenase oxygenase subunit	-	K15982-ko00984 Steroid degradation	COG4638-Phenylpropionate dioxygenase and related ring-hydroxylating dioxygenases, large terminal subunit[PR]
GE00556	13.53	28.94	-1.0969	1.51e-06	4.89e-06	down	GE00556	putative amino acid permease YtnA	-	-	COG1113-Gamma-aminobutyrate permease and related permeases[E]
GE00149	9.17	34.27	-1.90195	1.55e-06	5.04e-06	down	GE00149	hypothetical protein	-	-	-
GE02410	9.58	35.8	-1.90186	1.55e-06	5.04e-06	down	GE02410	hypothetical protein	-	-	-
GE00356	6.26	16.17	-1.36909	1.62e-06	5.26e-06	down	GE00356	putative 1,4-alpha-glucan branching enzyme Rv3031	GO:0005575,GO:0005576,GO:0005886,GO:0008150,GO:0016020,GO:0040007,GO:0071944	K16149-ko00500 Starch and sucrose metabolism	COG1543-Uncharacterized conserved protein[S]
GE04190	3.49	21.25	-2.60616	1.64e-06	5.29e-06	down	GE04190	putative protein Mb1573	-	-	-
GE03058	1.86	11.33	-2.60677	1.64e-06	5.29e-06	down	GE03058	hypothetical protein	-	-	-
GE02211	6.22	21.24	-1.7718	1.65e-06	5.33e-06	down	GE02211	(2Z,6E)-farnesyl diphosphate synthase	GO:0000287,GO:0002094,GO:0003674,GO:0003824,GO:0004659,GO:0005488,GO:0005575,GO:0005622,GO:0005737,GO:0005829,GO:0005886,GO:0006066,GO:0006629,GO:0006720,GO:0008150,GO:0008152,GO:0008299,GO:0008610,GO:0009058,GO:0009987,GO:0016020,GO:0016093,GO:0016094,GO:0016740,GO:0016765,GO:0030145,GO:0033850,GO:0043167,GO:0043169,GO:0044237,GO:0044238,GO:0044249,GO:0044255,GO:0044281,GO:0044283,GO:0046165,GO:…	K12503-ko00900 Terpenoid backbone biosynthesis	COG0020-Undecaprenyl pyrophosphate synthase[I]
GE03468	4.15	15.89	-1.93694	1.67e-06	5.4e-06	down	GE03468	O-antigen export system permease protein RfbD	-	-	COG1682-ABC-type polysaccharide/polyol phosphate export systems, permease component[GM]
GE03706	22.39	46.54	-1.05562	1.73e-06	5.57e-06	down	GE03706	Putative 6-phosphogluconate dehydrogenase YqeC	-	K00033-ko01200 Carbon metabolism;ko00030 Pentose phosphate pathway;ko00480 Glutathione metabolism	COG1023-Predicted 6-phosphogluconate dehydrogenase[G]
GE04792	4.4	11.78	-1.42076	1.78e-06	5.72e-06	down	GE04792	Biotin carboxyl carrier protein	-	K01965-ko01200 Carbon metabolism;ko00630 Glyoxylate and dicarboxylate metabolism;ko00640 Propanoate metabolism;ko00280 Valine, leucine and isoleucine degradation	COG4770-Acetyl/propionyl-CoA carboxylase, alpha subunit[I]
GE00286	7.38	21.87	-1.56726	1.79e-06	5.76e-06	down	GE00286	putative MscS family protein YkuT	-	-	COG0668-Small-conductance mechanosensitive channel[M]
GE04624	10.19	23.56	-1.20919	1.8e-06	5.8e-06	down	GE04624	putative protein sll0005	-	-	COG0661-Predicted unusual protein kinase[R]
GE03979	10.13	35.14	-1.79448	1.83e-06	5.87e-06	down	GE03979	hypothetical protein	-	-	-
GE00654	6.28	17.59	-1.48592	1.85e-06	5.92e-06	down	GE00654	Arsenical pump membrane protein	-	-	COG1055-Na+/H+ antiporter NhaD and related arsenite permeases[P]
GE02213	0.43	4.45	-3.3714	1.86e-06	5.98e-06	down	GE02213	Putative diacylglycerol O-acyltransferase Rv1425	-	K00635-ko00561 Glycerolipid metabolism	-
GE04566	16.99	34.47	-1.02066	1.89e-06	6.07e-06	down	GE04566	hypothetical protein	-	-	-
GE00282	21.56	62.23	-1.52925	1.97e-06	6.32e-06	down	GE00282	hypothetical protein	-	-	-
GE03675	2.81	20.76	-2.88516	1.98e-06	6.33e-06	down	GE03675	putative HTH-type transcriptional regulator YybR	-	-	COG1733-Predicted transcriptional regulators[K]
GE00547	6.41	20.96	-1.70924	2e-06	6.39e-06	down	GE00547	NAD-dependent protein deacetylase 1	-	-	COG0846-NAD-dependent protein deacetylases, SIR2 family[K]
GE03513	0.85	3.64	-2.0984	2.05e-06	6.55e-06	down	GE03513	putative arabinosyltransferase B	GO:0005575,GO:0005618,GO:0005886,GO:0008150,GO:0016020,GO:0030312,GO:0040007,GO:0071944	-	-
GE02533	0.47	6.56	-3.80296	2.1e-06	6.7e-06	down	GE02533	Fructokinase	-	K00847-ko00051 Fructose and mannose metabolism;ko00500 Starch and sucrose metabolism;ko00520 Amino sugar and nucleotide sugar metabolism	COG0524-Sugar kinases, ribokinase family[G]
GE02419	64.59	133	-1.04204	2.1e-06	6.71e-06	down	GE02419	hypothetical protein	-	-	-
GE04553	15.69	36.58	-1.22121	2.18e-06	6.94e-06	down	GE04553	Hydroxymethylpyrimidine/phosphomethylpyrimidine kinase	GO:0008150,GO:0040007	K00941-ko00730 Thiamine metabolism	COG0351-Hydroxymethylpyrimidine/phosphomethylpyrimidine kinase[H]
GE03055	15.83	38.46	-1.2807	2.32e-06	7.37e-06	down	GE03055	Putative 2-succinyl-6-hydroxy-2,4-cyclohexadiene-1-carboxylate synthase	-	-	COG0596-Predicted hydrolases or acyltransferases (alpha/beta hydrolase superfamily) [R]
GE01301	20.59	42.72	-1.05297	2.39e-06	7.59e-06	down	GE01301	Putative sporulation transcription regulator WhiA	GO:0005575,GO:0005618,GO:0005886,GO:0008150,GO:0016020,GO:0030312,GO:0043937,GO:0050789,GO:0050793,GO:0065007,GO:0071944	-	COG1481-Uncharacterized protein conserved in bacteria[S]
GE01597	6.25	22.95	-1.87657	2.41e-06	7.65e-06	down	GE01597	hypothetical protein	-	-	COG1434-Uncharacterized conserved protein[S]
GE03064	27.63	87.97	-1.67078	2.66e-06	8.41e-06	down	GE03064	hypothetical protein	-	-	-
GE00430	10.4	35.55	-1.77327	2.79e-06	8.8e-06	down	GE00430	putative protein Mb2948c	GO:0005575,GO:0005886,GO:0016020,GO:0071944	-	COG1765-Predicted redox protein, regulator of disulfide bond formation[O]
GE02181	14.17	31.54	-1.15434	2.93e-06	9.23e-06	down	GE02181	Ribosome-binding ATPase YchF	-	-	COG0012-Predicted GTPase, probable translation factor[J]
GE04494	30.79	121.96	-1.98587	2.99e-06	9.41e-06	down	GE04494	hypothetical protein	-	-	-
GE00948	37.24	75.9	-1.02725	2.99e-06	9.41e-06	down	GE00948	Phosphoheptose isomerase	-	K03271-ko00540 Lipopolysaccharide biosynthesis	COG0279-Phosphoheptose isomerase[G]
GE03845	7.56	24.37	-1.68865	3e-06	9.43e-06	down	GE03845	hypothetical protein	-	-	-
GE02867	2.29	12.51	-2.44966	3.08e-06	9.66e-06	down	GE02867	Ferredoxin, 2Fe-2S	-	-	COG3411-Ferredoxin[C]
GE04704	3.64	14.88	-2.03136	3.16e-06	9.89e-06	down	GE04704	Cytochrome c-type biogenesis protein CcdA	-	-	COG0785-Cytochrome c biogenesis protein[O]
GE00519	26.64	57.47	-1.10921	3.22e-06	1.01e-05	down	GE00519	putative protein Rv2286c	GO:0005575,GO:0005618,GO:0030312,GO:0071944	-	-
GE03368	9.49	25.89	-1.44791	3.27e-06	1.02e-05	down	GE03368	hypothetical protein	-	-	COG2264-Ribosomal protein L11 methylase[J]
GE02375	5.01	25.6	-2.35326	3.28e-06	1.02e-05	down	GE02375	putative protein YurT	-	-	-
GE00613	5.3	24.32	-2.19808	3.42e-06	1.07e-05	down	GE00613	Zinc uptake regulation protein	GO:0000976,GO:0001067,GO:0001217,GO:0003674,GO:0003676,GO:0003677,GO:0003690,GO:0003700,GO:0005488,GO:0005515,GO:0005575,GO:0005886,GO:0006355,GO:0008150,GO:0008270,GO:0009889,GO:0009890,GO:0009891,GO:0009892,GO:0009893,GO:0010035,GO:0010038,GO:0010043,GO:0010468,GO:0010556,GO:0010557,GO:0010558,GO:0010604,GO:0010605,GO:0010628,GO:0010629,GO:0016020,GO:0019219,GO:0019222,GO:0031323,GO:0031324,GO:…	-	COG0735-Fe2+/Zn2+ uptake regulation proteins[P]
GE03313	5.26	14.05	-1.41744	3.42e-06	1.07e-05	down	GE03313	Long-chain-fatty-acid--CoA ligase	-	-	COG0318-Acyl-CoA synthetases (AMP-forming)/AMP-acid ligases II[IQ]
GE00181	8.44	22.56	-1.41845	3.42e-06	1.07e-05	down	GE00181	2-phospho-L-lactate transferase	-	K11212-ko00680 Methane metabolism	COG0391-Uncharacterized conserved protein[S]
GE00448	8.61	26.72	-1.63383	3.49e-06	1.09e-05	down	GE00448	Putative mycofactocin biosynthesis transcriptional regulator MftR	-	-	COG1309-Transcriptional regulator[K]
GE00932	23.95	79.31	-1.72748	3.79e-06	1.18e-05	down	GE00932	Gas vesicle protein GvpS	-	-	-
GE04615	5.5	15.08	-1.45513	3.8e-06	1.18e-05	down	GE04615	putative HTH-type transcriptional regulator Rv0465c	GO:0001666,GO:0003674,GO:0003676,GO:0003677,GO:0005488,GO:0005575,GO:0005886,GO:0006355,GO:0006950,GO:0008150,GO:0009628,GO:0009889,GO:0010468,GO:0010556,GO:0016020,GO:0019219,GO:0019222,GO:0031323,GO:0031326,GO:0036293,GO:0050789,GO:0050794,GO:0050896,GO:0051171,GO:0051252,GO:0060255,GO:0065007,GO:0070482,GO:0071944,GO:0080090,GO:0097159,GO:1901363,GO:1903506,GO:2000112,GO:2001141	-	COG3800-Predicted transcriptional regulator[R]
GE00991	0.82	10.98	-3.74311	3.87e-06	1.2e-05	down	GE00991	hypothetical protein	-	-	-
GE00202	0.62	14.71	-4.56839	3.96e-06	1.23e-05	down	GE00202	hypothetical protein	-	-	-
GE00560	11.05	29.67	-1.42496	3.99e-06	1.24e-05	down	GE00560	putative nicotinate-nucleotide adenylyltransferase	GO:0000309,GO:0003674,GO:0003824,GO:0004515,GO:0006082,GO:0006139,GO:0006520,GO:0006531,GO:0006725,GO:0006753,GO:0006793,GO:0006796,GO:0006807,GO:0008150,GO:0008152,GO:0009058,GO:0009066,GO:0009117,GO:0009165,GO:0009435,GO:0009987,GO:0016740,GO:0016772,GO:0016779,GO:0018130,GO:0019355,GO:0019359,GO:0019362,GO:0019363,GO:0019438,GO:0019637,GO:0019674,GO:0019752,GO:0034627,GO:0034628,GO:0034641,GO:…	K00969-ko00760 Nicotinate and nicotinamide metabolism	COG1057-Nicotinic acid mononucleotide adenylyltransferase[H]
GE03712	22.65	52.96	-1.22539	4.2e-06	1.3e-05	down	GE03712	Protein jag	-	-	COG1847-Predicted RNA-binding protein[R]
GE01449	4.02	11.72	-1.54371	4.39e-06	1.35e-05	down	GE01449	putative MFS-type transporter YusP	-	-	-
GE03682	7.15	17.71	-1.30855	4.44e-06	1.37e-05	down	GE03682	PP2C-family Ser/Thr phosphatase	GO:0000287,GO:0001932,GO:0001933,GO:0003674,GO:0003824,GO:0004647,GO:0004721,GO:0005488,GO:0005575,GO:0005618,GO:0005886,GO:0005887,GO:0006464,GO:0006469,GO:0006470,GO:0006793,GO:0006796,GO:0006807,GO:0008150,GO:0008152,GO:0009892,GO:0009987,GO:0010563,GO:0010605,GO:0016020,GO:0016021,GO:0016311,GO:0016787,GO:0016788,GO:0016791,GO:0019220,GO:0019222,GO:0019538,GO:0030145,GO:0030312,GO:0031224,GO:…	-	COG0631-Serine/threonine protein phosphatase[T]
GE03109	16.1	42.58	-1.40312	4.85e-06	1.49e-05	down	GE03109	hypothetical protein	-	-	-
GE04315	50.89	101.79	-1.00014	5.06e-06	1.56e-05	down	GE04315	hypothetical protein	-	-	-
GE03523	3.82	10.59	-1.47106	5.13e-06	1.57e-05	down	GE03523	hypothetical protein	GO:0008150,GO:0040007	-	-
GE00399	13.53	34.03	-1.33065	5.19e-06	1.59e-05	down	GE00399	2-phospho-L-lactate guanylyltransferase	GO:0003674,GO:0003824,GO:0008150,GO:0008152,GO:0009058,GO:0009987,GO:0016740,GO:0016772,GO:0016779,GO:0043814,GO:0044237,GO:0044249,GO:0070568	K14941-ko00680 Methane metabolism	COG1920-Uncharacterized conserved protein[S]
GE04840	3.68	12.81	-1.79949	5.22e-06	1.6e-05	down	GE04840	Putative alcohol dehydrogenase D	GO:0005575,GO:0005618,GO:0008150,GO:0009268,GO:0009628,GO:0010447,GO:0030312,GO:0040007,GO:0044110,GO:0044117,GO:0044119,GO:0044403,GO:0044419,GO:0050896,GO:0051704,GO:0071944	-	COG1062-Zn-dependent alcohol dehydrogenases, class III[C]
GE01353	6.26	21.79	-1.79943	5.22e-06	1.6e-05	down	GE01353	hypothetical protein	-	-	-
GE04734	0.0001	7.54	-16.2023	5.4e-06	1.65e-05	down	GE04734	hypothetical protein	-	-	-
GE02910	5.09	25.37	-2.31739	5.44e-06	1.66e-05	down	GE02910	hypothetical protein	-	-	-
GE02844	24.61	53.32	-1.11543	5.55e-06	1.69e-05	down	GE02844	UPF0173 metal-dependent hydrolase CHY_0920	-	-	COG2220-Predicted Zn-dependent hydrolases of the beta-lactamase fold[R]
GE03891	1.86	8.74	-2.23233	5.56e-06	1.7e-05	down	GE03891	hypothetical protein	-	-	-
GE04327	5.77	18.81	-1.70486	5.71e-06	1.74e-05	down	GE04327	tRNA (guanine-N(7)-)-methyltransferase	GO:0001510,GO:0003674,GO:0003824,GO:0005575,GO:0005622,GO:0005737,GO:0006139,GO:0006396,GO:0006399,GO:0006400,GO:0006725,GO:0006807,GO:0008033,GO:0008150,GO:0008152,GO:0008168,GO:0008173,GO:0008175,GO:0008176,GO:0008757,GO:0009451,GO:0009987,GO:0010467,GO:0016070,GO:0016423,GO:0016740,GO:0016741,GO:0030488,GO:0032259,GO:0032991,GO:0034470,GO:0034641,GO:0034660,GO:0034708,GO:0036265,GO:0040007,GO:…	-	COG0220-Predicted S-adenosylmethionine-dependent methyltransferase[R]
GE04764	25.96	60.79	-1.22754	5.84e-06	1.78e-05	down	GE04764	50S ribosomal protein L1	GO:0000470,GO:0003674,GO:0003676,GO:0003723,GO:0005488,GO:0005575,GO:0005618,GO:0005622,GO:0005737,GO:0005829,GO:0005840,GO:0005886,GO:0006139,GO:0006364,GO:0006396,GO:0006412,GO:0006518,GO:0006725,GO:0006807,GO:0008150,GO:0008152,GO:0009058,GO:0009059,GO:0009987,GO:0010467,GO:0015934,GO:0016020,GO:0016070,GO:0016072,GO:0019538,GO:0022613,GO:0022625,GO:0022626,GO:0030312,GO:0032991,GO:0034470,GO:…	K02863-ko03010 Ribosome	COG0081-Ribosomal protein L1[J]
GE02490	4.74	13.21	-1.47867	5.95e-06	1.81e-05	down	GE02490	putative MFS-type transporter Rv1250	-	-	COG2270-Permeases of the major facilitator superfamily[R]
GE02256	16.05	40.48	-1.33464	6.09e-06	1.85e-05	down	GE02256	HTH-type transcriptional repressor DhaR	-	-	COG1309-Transcriptional regulator[K]
GE00111	12.21	33.23	-1.44442	6.31e-06	1.92e-05	down	GE00111	hypothetical protein	-	-	COG3212-Predicted membrane protein[S]
GE04830	4.65	12.65	-1.44383	6.31e-06	1.92e-05	down	GE04830	3-oxocholest-4-en-26-oate--CoA ligase	-	-	COG0318-Acyl-CoA synthetases (AMP-forming)/AMP-acid ligases II[IQ]
GE00292	3.75	12.42	-1.7277	6.41e-06	1.95e-05	down	GE00292	putative inactive lipase Rv1592c	-	-	-
GE02826	5.19	16.25	-1.64663	6.69e-06	2.03e-05	down	GE02826	hypothetical protein	-	-	COG4448-L-asparaginase II[E]
GE04100	3.45	12.82	-1.89373	6.86e-06	2.07e-05	down	GE04100	UPF0336 protein SAV_4901	-	-	COG1545-Predicted nucleic-acid-binding protein containing a Zn-ribbon[R]
GE01234	9.84	33.1	-1.7501	7.17e-06	2.17e-05	down	GE01234	hypothetical protein	-	-	COG3607-Predicted lactoylglutathione lyase[R]
GE00874	1.25	7.68	-2.61918	7.2e-06	2.17e-05	down	GE00874	Aliphatic amidase	-	K01426-ko00330 Arginine and proline metabolism;ko00360 Phenylalanine metabolism;ko00380 Tryptophan metabolism;ko00627 Aminobenzoate degradation;ko00643 Styrene degradation	COG0388-Predicted amidohydrolase[R]
GE00903	0.3	6.79	-4.50038	7.34e-06	2.21e-05	down	GE00903	hypothetical protein	-	-	-
GE01063	4.19	15.98	-1.93125	7.4e-06	2.23e-05	down	GE01063	UPF0749 protein Mb1856 (Precursor)	GO:0005575,GO:0005576,GO:0005886,GO:0005887,GO:0016020,GO:0016021,GO:0031224,GO:0031226,GO:0071944	-	COG3879-Uncharacterized protein conserved in bacteria[S]
GE03137	7.92	16.33	-1.04395	7.45e-06	2.25e-05	down	GE03137	putative ATP-dependent helicase YprA	-	-	COG1205-Distinct helicase family with a unique C-terminal domain including a metal-binding cysteine cluster[R]
GE04590	2.74	8.27	-1.59371	7.63e-06	2.29e-05	down	GE04590	putative peptidase y4nA	-	K01322-ko04614 Renin-angiotensin system	COG1505-Serine proteases of the peptidase family S9A[E]
GE03193	4.7	14.2	-1.59516	7.63e-06	2.29e-05	down	GE03193	Serine protease Rv3671c	GO:0005575,GO:0005576,GO:0005618,GO:0005886,GO:0005887,GO:0008150,GO:0009268,GO:0009405,GO:0009628,GO:0010447,GO:0016020,GO:0016021,GO:0030312,GO:0031224,GO:0031226,GO:0044419,GO:0050896,GO:0051704,GO:0071944	-	COG0265-Trypsin-like serine proteases, typically periplasmic, contain C-terminal PDZ domain[O]
GE00446	4.26	16.72	-1.97265	7.91e-06	2.38e-05	down	GE00446	hypothetical protein	-	-	-
GE00901	20.07	68.69	-1.77506	7.98e-06	2.39e-05	down	GE00901	hypothetical protein	-	-	-
GE04816	8.31	23.44	-1.49605	8e-06	2.4e-05	down	GE04816	hypothetical protein	-	-	-
GE00097	8.4	21.67	-1.36724	8.23e-06	2.47e-05	down	GE00097	Inner membrane protein YhjD	-	-	COG1295-Predicted membrane protein[S]
GE02381	5.43	14.01	-1.36743	8.23e-06	2.47e-05	down	GE02381	IMP cyclohydrolase	GO:0005575,GO:0005886,GO:0008150,GO:0016020,GO:0040007,GO:0071944	K00602-ko00230 Purine metabolism;ko00670 One carbon pool by folate	COG0138-AICAR transformylase/IMP cyclohydrolase PurH (only IMP cyclohydrolase domain in Aful)[F]
GE01418	0.6	4.71	-2.97269	8.45e-06	2.53e-05	down	GE01418	Beta-glucosidase A	-	K05350-ko00500 Starch and sucrose metabolism;ko00460 Cyanoamino acid metabolism;ko00940 Phenylpropanoid biosynthesis	COG2723-Beta-glucosidase/6-phospho-beta-glucosidase/beta-galactosidase[G]
GE01622	1.03	8.11	-2.97706	8.45e-06	2.53e-05	down	GE01622	Methionine-binding lipoprotein MetQ (Precursor)	-	K02073-ko02010 ABC transporters	COG1464-ABC-type metal ion transport system, periplasmic component/surface antigen[P]
GE03770	5.27	12.81	-1.2814	8.47e-06	2.53e-05	down	GE03770	hypothetical protein	-	-	-
GE02549	2.19	6.4	-1.54714	8.49e-06	2.53e-05	down	GE02549	hypothetical protein	-	-	-
GE02640	6.76	18.59	-1.45943	8.54e-06	2.55e-05	down	GE02640	Magnesium transport protein CorA	-	-	COG0598-Mg2+ and Co2+ transporters[P]
GE04556	7.79	24.99	-1.68166	8.58e-06	2.55e-05	down	GE04556	hypothetical protein	-	-	-
GE04405	24.86	53.44	-1.10409	8.63e-06	2.57e-05	down	GE04405	hypothetical protein	-	-	-
GE04719	6.79	28.54	-2.0715	8.75e-06	2.6e-05	down	GE04719	putative protein SCO3922	-	-	COG1950-Predicted membrane protein[S]
GE05006	3.24	11.3	-1.80226	8.84e-06	2.62e-05	down	GE05006	hypothetical protein	-	-	-
GE01318	9.08	39.8	-2.132	9e-06	2.67e-05	down	GE01318	hypothetical protein	-	-	-
GE00687	2.13	9.31	-2.12793	9e-06	2.67e-05	down	GE00687	Aminomethyltransferase	GO:0005575,GO:0005618,GO:0008150,GO:0030312,GO:0040007,GO:0071944	K00605-ko01200 Carbon metabolism;ko00630 Glyoxylate and dicarboxylate metabolism;ko00260 Glycine, serine and threonine metabolism;ko00670 One carbon pool by folate	COG0404-Glycine cleavage system T protein (aminomethyltransferase)[E]
GE00418	9.29	26.38	-1.50569	9.26e-06	2.74e-05	down	GE00418	Ribonuclease 3	GO:0003674,GO:0003676,GO:0003723,GO:0003725,GO:0003824,GO:0004518,GO:0004519,GO:0004521,GO:0004525,GO:0004540,GO:0005488,GO:0006139,GO:0006396,GO:0006725,GO:0006807,GO:0008150,GO:0008152,GO:0009987,GO:0010467,GO:0016070,GO:0016787,GO:0016788,GO:0016891,GO:0016893,GO:0032296,GO:0034641,GO:0040007,GO:0043170,GO:0044237,GO:0044238,GO:0046483,GO:0071704,GO:0090304,GO:0090305,GO:0090501,GO:0090502,GO:…	K03685-ko03008 Ribosome biogenesis in eukaryotes;ko05205 Proteoglycans in cancer	COG0571-dsRNA-specific ribonuclease[K]
GE00879	9.99	26.34	-1.3987	9.37e-06	2.77e-05	down	GE00879	putative oxidoreductase YohF	-	-	COG1028-Dehydrogenases with different specificities (related to short-chain alcohol dehydrogenases)[IQR]
GE04335	7.43	24.2	-1.70357	9.67e-06	2.86e-05	down	GE04335	hypothetical protein	-	-	-
GE04431	0.0001	17.26	-17.3971	9.67e-06	2.86e-05	down	GE04431	hypothetical protein	-	-	-
GE01453	13.92	34.83	-1.32317	9.95e-06	2.93e-05	down	GE01453	Trk system potassium uptake protein TrkA	-	-	COG0569-K+ transport systems, NAD-binding component[P]
GE01139	14.63	32.07	-1.13229	1e-05	2.96e-05	down	GE01139	F420-dependent glucose-6-phosphate dehydrogenase	-	-	COG2141-Coenzyme F420-dependent N5,N10-methylene tetrahydromethanopterin reductase and related flavin-dependent oxidoreductases[C]
GE03291	1.4	9.44	-2.75336	1.06e-05	3.12e-05	down	GE03291	Nitrate reductase-like protein NarX	GO:0001666,GO:0006950,GO:0008150,GO:0009628,GO:0036293,GO:0050896,GO:0070482	K00374-ko00910 Nitrogen metabolism;ko02020 Two-component system	COG2181-Nitrate reductase gamma subunit[C]
GE02985	2.51	16.9	-2.75126	1.06e-05	3.12e-05	down	GE02985	hypothetical protein	-	-	-
GE02214	16.58	61.95	-1.90166	1.16e-05	3.39e-05	down	GE02214	hypothetical protein	-	-	-
GE01203	20.59	41.4	-1.00769	1.19e-05	3.5e-05	down	GE01203	putative protein Synpcc7942_2318	-	-	COG3224-Uncharacterized protein conserved in bacteria[S]
GE01238	5.77	18.22	-1.65888	1.28e-05	3.76e-05	down	GE01238	hypothetical protein	-	-	COG2050-Uncharacterized protein, possibly involved in aromatic compounds catabolism[Q]
GE00747	6.96	18.13	-1.38122	1.32e-05	3.87e-05	down	GE00747	UDP-N-acetylglucosamine--N-acetylmuramyl- (pentapeptide) pyrophosphoryl-undecaprenol N-acetylglucosamine transferase	-	K02563-ko00550 Peptidoglycan biosynthesis;ko04112 Cell cycle - Caulobacter;ko01502 Vancomycin resistance	COG0707-UDP-N-acetylglucosamine:LPS N-acetylglucosamine transferase[M]
GE02055	7.55	19.32	-1.35555	1.35e-05	3.96e-05	down	GE02055	hypothetical protein	-	-	COG2951-Membrane-bound lytic murein transglycosylase B[M]
GE02511	0.56	11.86	-4.40453	1.36e-05	3.98e-05	down	GE02511	hypothetical protein	-	-	COG3759-Predicted membrane protein[S]
GE02538	1.74	9.44	-2.4397	1.36e-05	3.98e-05	down	GE02538	putative protein Mb0907c	GO:0008150,GO:0040007	-	-
GE00954	6.07	24.96	-2.03985	1.4e-05	4.09e-05	down	GE00954	hypothetical protein	-	-	-
GE03444	13.61	37.17	-1.44947	1.42e-05	4.15e-05	down	GE03444	Putative xanthine dehydrogenase YagT iron-sulfur-binding subunit (Precursor)	-	K13483-ko00230 Purine metabolism	COG2080-Aerobic-type carbon monoxide dehydrogenase, small subunit CoxS/CutS homologs[C]
GE00852	9.15	26.59	-1.53904	1.43e-05	4.15e-05	down	GE00852	Imidazole glycerol phosphate synthase subunit HisH	GO:0005575,GO:0005618,GO:0008150,GO:0030312,GO:0040007,GO:0071944	K02501-ko01230 Biosynthesis of amino acids;ko00340 Histidine metabolism	COG0118-Glutamine amidotransferase[E]
GE04196	1.08	5.43	-2.32992	1.44e-05	4.21e-05	down	GE04196	Long-chain-fatty-acid--CoA ligase	-	-	COG0318-Acyl-CoA synthetases (AMP-forming)/AMP-acid ligases II[IQ]
GE00892	10.96	51.87	-2.24265	1.48e-05	4.31e-05	down	GE00892	hypothetical protein	-	-	-
GE00009	9.33	41.84	-2.16493	1.48e-05	4.31e-05	down	GE00009	Amicyanin (Precursor)	-	-	COG3794-Plastocyanin[C]
GE04757	0.57	4.36	-2.93529	1.5e-05	4.35e-05	down	GE04757	Geranial dehydrogenase	-	-	COG1012-NAD-dependent aldehyde dehydrogenases[C]
GE00823	29.83	63.58	-1.09181	1.58e-05	4.59e-05	down	GE00823	putative protein Mb1617	-	-	-
GE00938	25.93	61.77	-1.25228	1.59e-05	4.62e-05	down	GE00938	Gas vesicle structural protein	-	-	-
GE00521	6.21	19.08	-1.6194	1.68e-05	4.85e-05	down	GE00521	Endonuclease 8 1	GO:0000702,GO:0000703,GO:0003674,GO:0003676,GO:0003677,GO:0003690,GO:0003697,GO:0003824,GO:0003906,GO:0004844,GO:0005488,GO:0006139,GO:0006259,GO:0006281,GO:0006289,GO:0006725,GO:0006807,GO:0006950,GO:0006974,GO:0006979,GO:0008150,GO:0008152,GO:0008534,GO:0009987,GO:0016787,GO:0016798,GO:0016799,GO:0019104,GO:0033554,GO:0034599,GO:0034641,GO:0042221,GO:0043170,GO:0044237,GO:0044238,GO:0044260,GO:…	K05522-ko03410 Base excision repair	COG0266-Formamidopyrimidine-DNA glycosylase[L]
GE01563	27.15	55.67	-1.03595	1.68e-05	4.85e-05	down	GE01563	Iron-dependent repressor IdeR	-	-	COG1321-Mn-dependent transcriptional regulator[K]
GE01674	0.0001	7.69	-16.2307	1.74e-05	5.01e-05	down	GE01674	UPF0336 protein MAP_4107	GO:0001676,GO:0003674,GO:0003824,GO:0005575,GO:0005618,GO:0005886,GO:0006082,GO:0006629,GO:0006631,GO:0006633,GO:0008150,GO:0008152,GO:0008610,GO:0009058,GO:0009987,GO:0016020,GO:0016053,GO:0016829,GO:0016835,GO:0016836,GO:0019171,GO:0019752,GO:0030312,GO:0030497,GO:0032787,GO:0040007,GO:0042759,GO:0043436,GO:0044237,GO:0044238,GO:0044249,GO:0044255,GO:0044281,GO:0044283,GO:0046394,GO:0071704,GO:…	-	-
GE02626	0.0001	7.06	-16.1074	1.74e-05	5.01e-05	down	GE02626	HTH-type transcriptional repressor KstR2	-	-	COG1309-Transcriptional regulator[K]
GE03443	5.93	16.87	-1.50836	1.79e-05	5.16e-05	down	GE03443	putative protein MT1889	-	-	COG1253-Hemolysins and related proteins containing CBS domains[R]
GE02402	7.33	47.66	-2.70089	1.84e-05	5.29e-05	down	GE02402	hypothetical protein	-	-	-
GE00257	11.71	26.24	-1.16403	1.88e-05	5.38e-05	down	GE00257	Glutathione-regulated potassium-efflux system protein KefC	-	-	COG1226-Kef-type K+ transport systems, predicted NAD-binding component[P]
GE01544	16.23	38.72	-1.25442	1.88e-05	5.39e-05	down	GE01544	hypothetical protein	-	-	-
GE02437	8.22	20.78	-1.33799	1.89e-05	5.42e-05	down	GE02437	putative deferrochelatase/peroxidase YfeX	-	-	COG2837-Predicted iron-dependent peroxidase[P]
GE02978	4.81	14.93	-1.63411	1.91e-05	5.48e-05	down	GE02978	Acryloyl-CoA reductase (NADH)	-	-	COG1960-Acyl-CoA dehydrogenases[I]
GE02554	29.16	65.95	-1.17738	1.95e-05	5.56e-05	down	GE02554	Cold shock-like protein CspD	-	-	COG1278-Cold shock proteins[K]
GE00806	1.9	7.14	-1.90992	1.95e-05	5.58e-05	down	GE00806	Alkyl hydroperoxide reductase subunit F	-	-	COG3634-Alkyl hydroperoxide reductase, large subunit[O]
GE01903	0.62	5.6	-3.17509	1.99e-05	5.68e-05	down	GE01903	Putative aliphatic sulfonates-binding protein (Precursor)	-	K15553-ko00920 Sulfur metabolism;ko02010 ABC transporters	COG4521-ABC-type taurine transport system, periplasmic component[P]
GE00966	0.86	7.73	-3.16806	1.99e-05	5.68e-05	down	GE00966	hypothetical protein	-	-	-
GE04621	6.62	17.87	-1.43264	2.03e-05	5.79e-05	down	GE04621	NADP-dependent alcohol dehydrogenase C 2	-	-	COG1064-Zn-dependent alcohol dehydrogenases[R]
GE03785	2.51	8.44	-1.74956	2.06e-05	5.87e-05	down	GE03785	Multidrug resistance protein B-like protein	-	-	-
GE01744	2.13	8.27	-1.95703	2.1e-05	5.96e-05	down	GE01744	Homoserine dehydrogenase	GO:0005575,GO:0005618,GO:0005886,GO:0008150,GO:0016020,GO:0030312,GO:0040007,GO:0071944	K00003-ko01230 Biosynthesis of amino acids;ko00260 Glycine, serine and threonine metabolism;ko00270 Cysteine and methionine metabolism;ko00300 Lysine biosynthesis	COG0460-Homoserine dehydrogenase[E]
GE03834	4.84	28.05	-2.53492	2.11e-05	5.99e-05	down	GE03834	Putative heat shock protein HspR	-	-	COG0789-Predicted transcriptional regulators[K]
GE00443	1.31	7.59	-2.53453	2.11e-05	5.99e-05	down	GE00443	hypothetical protein	-	-	COG5485-Predicted ester cyclase[R]
GE04563	2.26	13.07	-2.53186	2.11e-05	5.99e-05	down	GE04563	hypothetical protein	-	-	-
GE01565	11.63	27.11	-1.22097	2.13e-05	6.04e-05	down	GE01565	tRNA pseudouridine synthase B	GO:0001522,GO:0003674,GO:0003824,GO:0005575,GO:0005618,GO:0006139,GO:0006396,GO:0006399,GO:0006400,GO:0006725,GO:0006807,GO:0008033,GO:0008150,GO:0008152,GO:0009451,GO:0009982,GO:0009987,GO:0010467,GO:0016070,GO:0016071,GO:0016556,GO:0016853,GO:0016866,GO:0030312,GO:0034470,GO:0034641,GO:0034660,GO:0043170,GO:0043412,GO:0044237,GO:0044238,GO:0046483,GO:0071704,GO:0071944,GO:0090304,GO:1901360,GO:…	-	COG0130-Pseudouridine synthase[J]
GE02134	11.64	25.28	-1.11891	2.18e-05	6.18e-05	down	GE02134	Acetyl-CoA:oxalate CoA-transferase	-	-	COG1804-Predicted acyl-CoA transferases/carnitine dehydratase[C]
GE01621	2.54	10.18	-2.00284	2.23e-05	6.3e-05	down	GE01621	Methionine import ATP-binding protein MetN	-	K02071-ko02010 ABC transporters	COG1135-ABC-type metal ion transport system, ATPase component[P]
GE01260	6.43	22.04	-1.77723	2.29e-05	6.47e-05	down	GE01260	HTH-type transcriptional repressor AcnR	GO:0000287,GO:0003674,GO:0003676,GO:0003677,GO:0005488,GO:0006355,GO:0008150,GO:0009889,GO:0010468,GO:0010556,GO:0019219,GO:0019222,GO:0031323,GO:0031326,GO:0043167,GO:0043169,GO:0046872,GO:0050789,GO:0050794,GO:0051171,GO:0051252,GO:0060255,GO:0065007,GO:0080090,GO:0097159,GO:1901363,GO:1903506,GO:2000112,GO:2001141	-	-
GE03318	3.16	16.72	-2.40358	2.29e-05	6.47e-05	down	GE03318	hypothetical protein	-	-	-
GE03080	2.48	12.15	-2.29254	2.4e-05	6.76e-05	down	GE03080	Lysine--tRNA ligase	GO:0008150,GO:0040007	K04567-ko00970 Aminoacyl-tRNA biosynthesis	COG1190-Lysyl-tRNA synthetase (class II)[J]
GE03705	1.76	7.68	-2.12553	2.41e-05	6.77e-05	down	GE03705	DNA replication and repair protein RecF	GO:0000731,GO:0005575,GO:0005622,GO:0005737,GO:0005829,GO:0005886,GO:0006139,GO:0006259,GO:0006281,GO:0006302,GO:0006725,GO:0006807,GO:0006950,GO:0006974,GO:0008150,GO:0008152,GO:0009058,GO:0009059,GO:0009987,GO:0016020,GO:0018130,GO:0019438,GO:0033554,GO:0034641,GO:0034645,GO:0034654,GO:0043170,GO:0044237,GO:0044238,GO:0044249,GO:0044260,GO:0044271,GO:0046483,GO:0050896,GO:0051716,GO:0071704,GO:…	K03629-ko03440 Homologous recombination	COG1195-Recombinational DNA repair ATPase (RecF pathway)[L]
GE01060	3.17	14.61	-2.2044	2.43e-05	6.84e-05	down	GE01060	Putative CDP-diacylglycerol--glycerol-3-phosphate 3-phosphatidyl-transferase	GO:0003674,GO:0003824,GO:0006629,GO:0006644,GO:0006650,GO:0006793,GO:0006796,GO:0008150,GO:0008152,GO:0008444,GO:0008610,GO:0008654,GO:0009058,GO:0009987,GO:0016740,GO:0016772,GO:0016780,GO:0017169,GO:0019637,GO:0044237,GO:0044238,GO:0044249,GO:0044255,GO:0045017,GO:0046474,GO:0046486,GO:0071704,GO:0090407,GO:1901576	K08744-ko00564 Glycerophospholipid metabolism	-
GE01231	10.33	31.21	-1.59517	2.49e-05	6.97e-05	down	GE01231	hypothetical protein	-	-	-
GE01167	4.81	16.85	-1.80864	2.54e-05	7.12e-05	down	GE01167	putative protein Mb2118c	GO:0005575,GO:0005618,GO:0005886,GO:0005887,GO:0016020,GO:0016021,GO:0030312,GO:0031224,GO:0031226,GO:0071944	-	-
GE00641	1.83	13.34	-2.86584	2.64e-05	7.39e-05	down	GE00641	UPF0719 transmembrane protein MAP_1032c	-	-	-
GE00995	1.13	8.21	-2.86106	2.64e-05	7.39e-05	down	GE00995	Glutamine transport ATP-binding protein GlnQ	-	-	COG1126-ABC-type polar amino acid transport system, ATPase component[E]
GE01219	5.03	14.66	-1.54325	2.77e-05	7.72e-05	down	GE01219	Dihydroorotate dehydrogenase (quinone)	GO:0005575,GO:0005886,GO:0016020,GO:0071944	K00254-ko00240 Pyrimidine metabolism	COG0167-Dihydroorotate dehydrogenase[F]
GE02277	2.16	5.75	-1.41253	2.89e-05	8.07e-05	down	GE02277	Putative type I restriction enzyme HindVIIP R protein	-	-	COG0610-Type I site-specific restriction-modification system, R (restriction) subunit and related helicases[V]
GE01866	4.76	9.94	-1.06228	3.01e-05	8.4e-05	down	GE01866	RecBCD enzyme subunit RecC	GO:0003674,GO:0003678,GO:0003824,GO:0004386,GO:0004518,GO:0004519,GO:0005575,GO:0005576,GO:0005618,GO:0005886,GO:0006139,GO:0006259,GO:0006281,GO:0006302,GO:0006310,GO:0006725,GO:0006807,GO:0006950,GO:0006974,GO:0006996,GO:0008094,GO:0008150,GO:0008152,GO:0009987,GO:0016020,GO:0016043,GO:0016462,GO:0016787,GO:0016788,GO:0016817,GO:0016818,GO:0016887,GO:0017111,GO:0030312,GO:0032392,GO:0032508,GO:…	K03583-ko03440 Homologous recombination	COG1330-Exonuclease V gamma subunit[L]
GE03425	28.82	61.25	-1.08764	3.06e-05	8.51e-05	down	GE03425	hypothetical protein	-	-	COG3554-Uncharacterized protein conserved in bacteria[S]
GE01051	0.0001	5.42	-15.726	3.15e-05	8.75e-05	down	GE01051	Segregation and condensation protein B	-	-	COG1386-Predicted transcriptional regulator containing the HTH domain[K]
GE00779	0.0001	0.82	-13.0014	3.15e-05	8.75e-05	down	GE00779	hypothetical protein	-	-	-
GE01808	0.0001	11.82	-16.8509	3.15e-05	8.75e-05	down	GE01808	NAD(P) transhydrogenase subunit alpha part 2	-	K00324-ko00760 Nicotinate and nicotinamide metabolism	COG3288-NAD/NADP transhydrogenase alpha subunit[C]
GE00425	2.43	7.16	-1.559	3.19e-05	8.84e-05	down	GE00425	Potassium-transporting ATPase B chain	-	K01547-ko02020 Two-component system	COG2216-High-affinity K+ transport system, ATPase chain B[P]
GE00021	0.62	3.91	-2.65683	3.19e-05	8.84e-05	down	GE00021	hypothetical protein	-	-	-
GE00961	2.14	13.42	-2.6487	3.19e-05	8.84e-05	down	GE00961	hypothetical protein	-	-	-
GE02588	19.29	52.95	-1.45678	3.22e-05	8.9e-05	down	GE02588	putative transcriptional regulator WhiB7	GO:0001101,GO:0008150,GO:0010033,GO:0033993,GO:0042221,GO:0046677,GO:0050896,GO:0070542,GO:1901700	-	-
GE04996	29.3	78.42	-1.42032	3.38e-05	9.35e-05	down	GE04996	hypothetical protein	-	-	-
GE02202	0.38	3.26	-3.1008	3.58e-05	9.88e-05	down	GE02202	3-oxosteroid 1-dehydrogenase	-	K05898-ko00984 Steroid degradation	COG1249-Pyruvate/2-oxoglutarate dehydrogenase complex, dihydrolipoamide dehydrogenase (E3) component, and related enzymes[C]
GE04809	2.02	17.31	-3.09918	3.58e-05	9.88e-05	down	GE04809	hypothetical protein	-	-	-
GE02227	3.63	10.8	-1.57299	3.66e-05	0.000100979	down	GE02227	putative endopeptidase p60 (Precursor)	-	-	COG0791-Cell wall-associated hydrolases (invasion-associated proteins)[M]
GE00371	8.21	25.77	-1.65024	3.69e-05	0.000101588	down	GE00371	hypothetical protein	-	-	-
GE00308	1.43	6.11	-2.09516	3.89e-05	0.000107008	down	GE00308	ATP-dependent RNA helicase RhlE	-	-	COG0513-Superfamily II DNA and RNA helicases[LKJ]
GE01509	3.72	12.77	-1.77938	3.9e-05	0.000107144	down	GE01509	tRNA dimethylallyltransferase	GO:0003674,GO:0003824,GO:0006139,GO:0006396,GO:0006399,GO:0006400,GO:0006725,GO:0006807,GO:0008033,GO:0008150,GO:0008152,GO:0009451,GO:0009987,GO:0010467,GO:0016070,GO:0016740,GO:0016765,GO:0034470,GO:0034641,GO:0034660,GO:0040007,GO:0043170,GO:0043412,GO:0044237,GO:0044238,GO:0046483,GO:0052381,GO:0071704,GO:0090304,GO:0140098,GO:0140101,GO:1901360	K00791-ko00908 Zeatin biosynthesis	COG0324-tRNA delta(2)-isopentenylpyrophosphate transferase[J]
GE00378	3.39	10.79	-1.67034	4.18e-05	0.000114835	down	GE00378	Putative Na(+)/H(+) antiporter YjbQ	-	-	-
GE04274	12.35	37.12	-1.58769	4.2e-05	0.000115344	down	GE04274	Transcriptional repressor SmtB-like protein	-	-	COG0640-Predicted transcriptional regulators[K]
GE03375	5.99	18	-1.58737	4.2e-05	0.000115344	down	GE03375	Oxidoreductase UcpA	-	-	COG0300-Short-chain dehydrogenases of various substrate specificities[R]
GE01683	8.77	22.11	-1.33405	4.29e-05	0.000117421	down	GE01683	hypothetical protein	-	-	-
GE00145	12.03	30.34	-1.33458	4.29e-05	0.000117421	down	GE00145	Maf-like protein RER_21290	GO:0005575,GO:0005618,GO:0030312,GO:0071944	-	COG0424-Nucleotide-binding protein implicated in inhibition of septum formation[D]
GE02972	5.18	18.2	-1.81291	4.31e-05	0.000118014	down	GE02972	HTH-type transcriptional repressor KstR2	GO:0003674,GO:0003676,GO:0003677,GO:0003700,GO:0005488,GO:0005515,GO:0006355,GO:0008150,GO:0009889,GO:0010468,GO:0010556,GO:0010565,GO:0019216,GO:0019217,GO:0019219,GO:0019222,GO:0031323,GO:0031326,GO:0042802,GO:0042803,GO:0046983,GO:0050789,GO:0050794,GO:0051171,GO:0051252,GO:0060255,GO:0062012,GO:0065007,GO:0080090,GO:0097159,GO:0140110,GO:1901363,GO:1903506,GO:2000112,GO:2001141	-	COG1309-Transcriptional regulator[K]
GE03782	0.45	5.05	-3.48829	4.42e-05	0.000120555	down	GE03782	Trehalose transport system permease protein SugB	-	-	COG0395-ABC-type sugar transport system, permease component[G]
GE03463	1.26	14.13	-3.48727	4.42e-05	0.000120555	down	GE03463	putative protein aq_250	-	-	COG1734-DnaK suppressor protein[T]
GE03067	2.48	27.77	-3.48512	4.42e-05	0.000120555	down	GE03067	Thiocyanate hydrolase subunit alpha	-	-	-
GE02116	1.94	21.77	-3.48821	4.42e-05	0.000120555	down	GE02116	hypothetical protein	-	-	-
GE03604	0.66	7.39	-3.48504	4.42e-05	0.000120555	down	GE03604	putative protein YcnI (Precursor)	-	-	COG4549-Uncharacterized protein conserved in bacteria[S]
GE00945	0.67	4.69	-2.80735	4.65e-05	0.000126582	down	GE00945	putative sugar efflux transporter	-	-	COG2814-Arabinose efflux permease[G]
GE00660	11.42	33.07	-1.53396	4.66e-05	0.000126772	down	GE00660	hypothetical protein	-	-	-
GE00785	0.27	5.05	-4.22525	4.72e-05	0.000128342	down	GE00785	Putative short-chain type dehydrogenase/reductase MSMEG_6031/MSMEI_5872	-	-	COG1028-Dehydrogenases with different specificities (related to short-chain alcohol dehydrogenases)[IQR]
GE00808	0.25	4.69	-4.22959	4.72e-05	0.000128342	down	GE00808	putative protein Mb0965c	GO:0005575,GO:0005886,GO:0016020,GO:0071944	-	COG2141-Coenzyme F420-dependent N5,N10-methylene tetrahydromethanopterin reductase and related flavin-dependent oxidoreductases[C]
GE00962	3.17	10.26	-1.69448	4.72e-05	0.000128257	down	GE00962	hypothetical protein	-	-	-
GE04373	22.05	58.21	-1.40049	4.8e-05	0.00013033	down	GE04373	hypothetical protein	-	-	-
GE02575	9.99	26.36	-1.39979	4.8e-05	0.00013033	down	GE02575	hypothetical protein	-	-	-
GE00616	6.72	14.25	-1.08443	5.02e-05	0.00013571	down	GE00616	UPF0603 protein Rv2345 (Precursor)	GO:0005575,GO:0005618,GO:0005886,GO:0005887,GO:0016020,GO:0016021,GO:0030312,GO:0031224,GO:0031226,GO:0071944	-	-
trna19	14.76	89.36	-2.59794	5.5e-05	0.000148558	down	trna19	tRNA-Met	-	-	-
GE01004	2.59	15.64	-2.59422	5.5e-05	0.000148558	down	GE01004	hypothetical protein	-	-	-
GE04640	2.15	13.02	-2.59832	5.5e-05	0.000148558	down	GE04640	putative protein Mb0491c	-	-	-
GE01552	0.0001	8.33	-16.346	5.73e-05	0.000154429	down	GE01552	hypothetical protein	-	-	-
GE04681	0.0001	13.73	-17.067	5.73e-05	0.000154429	down	GE04681	putative protein Mb0520	-	-	-
GE01724	16.47	38.59	-1.22839	5.76e-05	0.000155017	down	GE01724	Cob(I)yrinic acid a,c-diamide adenosyltransferase	-	K00798-ko00860 Porphyrin and chlorophyll metabolism	COG2096-Uncharacterized conserved protein[S]
GE00355	11.77	24.45	-1.05472	5.82e-05	0.000156557	down	GE00355	Glycogen synthase	GO:0000271,GO:0003674,GO:0003824,GO:0005975,GO:0005976,GO:0005977,GO:0005978,GO:0006073,GO:0006091,GO:0006112,GO:0006629,GO:0008150,GO:0008152,GO:0008610,GO:0008653,GO:0009058,GO:0009059,GO:0009103,GO:0009250,GO:0009987,GO:0015980,GO:0016051,GO:0016740,GO:0016757,GO:0033692,GO:0034637,GO:0034645,GO:0040007,GO:0043170,GO:0044042,GO:0044237,GO:0044238,GO:0044249,GO:0044255,GO:0044260,GO:0044262,GO:…	K16150-ko00500 Starch and sucrose metabolism	COG0438-Glycosyltransferase[M]
GE04824	2.75	7.77	-1.49848	5.86e-05	0.000157584	down	GE04824	putative N-methylproline demethylase	-	-	COG1902-NADH:flavin oxidoreductases, Old Yellow Enzyme family[C]
GE04991	10.68	42.44	-1.99051	5.95e-05	0.000159885	down	GE04991	hypothetical protein	-	-	-
GE00096	3.92	12.27	-1.64621	6.26e-05	0.000168099	down	GE00096	Tryptophan--tRNA ligase	GO:0005575,GO:0005886,GO:0008150,GO:0016020,GO:0040007,GO:0071944	K01867-ko00970 Aminoacyl-tRNA biosynthesis	COG0180-Tryptophanyl-tRNA synthetase[J]
GE04201	3.8	11.89	-1.64568	6.26e-05	0.000168099	down	GE04201	Putative metal ion transporter YfjQ	-	-	COG0598-Mg2+ and Co2+ transporters[P]
GE01869	1.63	13.42	-3.04144	6.42e-05	0.000172054	down	GE01869	putative protein Mb0911c	-	-	COG2764-Uncharacterized protein conserved in bacteria[S]
GE04586	3.22	26.44	-3.03759	6.42e-05	0.000172054	down	GE04586	putative membrane protein YvlC	-	-	COG1983-Putative stress-responsive transcriptional regulator[KT]
GE03942	1.03	8.52	-3.04821	6.42e-05	0.000172054	down	GE03942	putative HTH-type transcriptional regulator YvkB	-	-	-
GE01533	0.95	7.81	-3.03932	6.42e-05	0.000172054	down	GE01533	Putative ABC transporter ATP-binding protein BQ02700	-	K16784-ko02010 ABC transporters	COG1122-ABC-type cobalt transport system, ATPase component[P]
GE03002	0.71	3.55	-2.32193	6.42e-05	0.000171823	down	GE03002	hypothetical protein	-	-	-
GE03342	1.13	4.93	-2.12526	6.46e-05	0.000172707	down	GE03342	Glutamyl-tRNA(Gln) amidotransferase subunit A	-	K02433-ko00970 Aminoacyl-tRNA biosynthesis	COG0154-Asp-tRNAAsn/Glu-tRNAGln amidotransferase A subunit and related amidases[J]
GE01994	2.54	11.1	-2.12766	6.46e-05	0.000172707	down	GE01994	putative short-chain type dehydrogenase/reductase blr2146	-	-	COG1028-Dehydrogenases with different specificities (related to short-chain alcohol dehydrogenases)[IQR]
GE03602	3.08	13.42	-2.12338	6.46e-05	0.000172707	down	GE03602	hypothetical protein	-	-	-
GE02604	9.13	31.39	-1.78162	6.63e-05	0.000176717	down	GE02604	putative HTH-type transcriptional regulator YuzN	-	-	COG0640-Predicted transcriptional regulators[K]
GE00287	6.61	22.73	-1.78188	6.63e-05	0.000176717	down	GE00287	hypothetical protein	-	-	-
GE00007	15.58	32.32	-1.05273	6.86e-05	0.000182503	down	GE00007	hypothetical protein	-	-	-
GE02372	12.7	30.2	-1.24972	6.93e-05	0.000184173	down	GE02372	putative transcriptional regulatory protein YhcZ	-	-	COG2909-ATP-dependent transcriptional regulator[K]
GE02504	7.15	22.69	-1.66604	7.11e-05	0.000188855	down	GE02504	hypothetical protein	-	-	-
GE01187	3.4	11.97	-1.81582	7.33e-05	0.000194667	down	GE01187	ATP-dependent helicase/deoxyribonuclease subunit B	-	-	COG2887-RecB family exonuclease[L]
GE03980	9.1	24.41	-1.42353	7.68e-05	0.000203508	down	GE03980	Lon protease	-	-	COG2802-Uncharacterized protein, similar to the N-terminal domain of Lon protease[R]
GE03898	3.22	9.26	-1.52395	7.86e-05	0.000207955	down	GE03898	Long-chain-fatty-acid--CoA ligase	-	-	COG0318-Acyl-CoA synthetases (AMP-forming)/AMP-acid ligases II[IQ]
GE04486	1.28	8.59	-2.74651	8.16e-05	0.000215272	down	GE04486	hypothetical protein	-	-	-
GE03029	8.35	19.15	-1.1975	8.99e-05	0.000236551	down	GE03029	HTH-type transcriptional repressor PurR	-	-	COG1609-Transcriptional regulators[K]
GE03793	12.37	25.95	-1.06889	9.16e-05	0.000240577	down	GE03793	Putative aminoglycoside phosphotransferase	-	-	COG3173-Predicted aminoglycoside phosphotransferase[R]
GE00456	2.55	7.83	-1.61852	9.33e-05	0.000244818	down	GE00456	hypothetical protein	-	-	-
GE03254	2.92	17.03	-2.54404	9.45e-05	0.000247901	down	GE03254	Transcriptional repressor SmtB-like protein	-	-	COG0640-Predicted transcriptional regulators[K]
GE04277	13.51	31.77	-1.23364	9.48e-05	0.000248376	down	GE04277	putative HTH-type transcriptional regulator TtgW	-	-	-
GE02323	3.71	8.23	-1.14947	9.5e-05	0.000248952	down	GE02323	putative WD repeat-containing protein all2124	-	-	COG2319-FOG: WD40 repeat[R]
GE04794	1.64	8.57	-2.3856	0.000102791	0.000268614	down	GE04794	putative enoyl-CoA hydratase	-	K01692-ko01212 Fatty acid metabolism;ko00640 Propanoate metabolism;ko00650 Butanoate metabolism;ko00071 Fatty acid degradation;ko00280 Valine, leucine and isoleucine degradation;ko00310 Lysine degradation;ko00360 Phenylalanine metabolism;ko00380 Tryptophan metabolism;ko00410 beta-Alanine metabolism;ko00903 Limonene and pinene degradation;ko00281 Geraniol degradation;ko00362 Benzoate degradation;k…	COG1024-Enoyl-CoA hydratase/carnithine racemase[I]
GE00515	15.58	48.52	-1.63888	0.000106412	0.000277753	down	GE00515	hypothetical protein	-	-	-
GE03037	2.17	9.72	-2.16326	0.000107073	0.000279319	down	GE03037	hypothetical protein	-	-	-
GE01189	3.54	12.2	-1.78506	0.000112922	0.000293726	down	GE01189	ATP phosphoribosyltransferase	GO:0000105,GO:0000166,GO:0000287,GO:0003674,GO:0003824,GO:0003879,GO:0005488,GO:0005524,GO:0005575,GO:0005886,GO:0006082,GO:0006520,GO:0006547,GO:0006725,GO:0006807,GO:0008144,GO:0008150,GO:0008152,GO:0008652,GO:0009058,GO:0009987,GO:0016020,GO:0016053,GO:0016208,GO:0016740,GO:0016757,GO:0016763,GO:0017076,GO:0018130,GO:0019438,GO:0019752,GO:0030554,GO:0032553,GO:0032555,GO:0032559,GO:0034641,GO:…	K00765-ko01230 Biosynthesis of amino acids;ko00340 Histidine metabolism	COG0040-ATP phosphoribosyltransferase[E]
GE01112	18.57	44.38	-1.25694	0.000113868	0.000296018	down	GE01112	putative HTH-type transcriptional regulator YdeC	-	-	COG2207-AraC-type DNA-binding domain-containing proteins[K]
GE02002	5.93	14.94	-1.33308	0.000114569	0.000297496	down	GE02002	Lactate 2-monooxygenase	-	K00467-ko00620 Pyruvate metabolism	COG1304-L-lactate dehydrogenase (FMN-dependent) and related alpha-hydroxy acid dehydrogenases[C]
GE04385	0.42	3.29	-2.96963	0.000114907	0.000298203	down	GE04385	Galactosyl transferase CpsE	-	-	COG2148-Sugar transferases involved in lipopolysaccharide synthesis[M]
GE00154	6.94	21.97	-1.66253	0.000120952	0.00031335	down	GE00154	hypothetical protein	-	-	COG2246-Predicted membrane protein[S]
GE02888	15.9	34.61	-1.12216	0.000121029	0.00031337	down	GE02888	Putative carboxymethylenebutenolidase	-	K01061-ko00364 Fluorobenzoate degradation;ko00361 Chlorocyclohexane and chlorobenzene degradation;ko00623 Toluene degradation	COG0412-Dienelactone hydrolase and related enzymes[Q]
GE03221	11.29	30.9	-1.45256	0.000122102	0.000315968	down	GE03221	putative protein YqeY	-	-	COG1610-Uncharacterized conserved protein[S]
GE00767	6.24	16.57	-1.40896	0.00012803	0.000331116	down	GE00767	Protein RarD	-	-	COG2962-Predicted permeases[R]
GE04567	2.54	16.39	-2.68992	0.000142533	0.000366735	down	GE04567	Putative antiporter subunit mnhG2	-	-	COG1320-Multisubunit Na+/H+ antiporter, MnhG subunit[P]
GE00923	8.43	19.11	-1.18072	0.000143712	0.000369557	down	GE00923	Lipopolysaccharide core heptosyltransferase RfaQ	-	-	COG0859-ADP-heptose:LPS heptosyltransferase[M]
GE02269	0.74	7.51	-3.34322	0.000148407	0.000381195	down	GE02269	Peptidyl-tRNA hydrolase	GO:0003674,GO:0003824,GO:0004045,GO:0005575,GO:0005886,GO:0008150,GO:0016020,GO:0016787,GO:0016788,GO:0040007,GO:0052689,GO:0071944,GO:0140098,GO:0140101	-	COG0193-Peptidyl-tRNA hydrolase[J]
GE01878	2.32	8.76	-1.91681	0.000148745	0.000381628	down	GE01878	hypothetical protein	-	-	-
GE01742	2.45	9.22	-1.91199	0.000148745	0.000381628	down	GE01742	Homoserine kinase	GO:0000096,GO:0000097,GO:0003674,GO:0003824,GO:0004413,GO:0005575,GO:0005622,GO:0005737,GO:0005829,GO:0006082,GO:0006520,GO:0006555,GO:0006566,GO:0006790,GO:0006793,GO:0006796,GO:0006807,GO:0008150,GO:0008152,GO:0008652,GO:0009058,GO:0009066,GO:0009067,GO:0009069,GO:0009086,GO:0009088,GO:0009092,GO:0009987,GO:0016053,GO:0016301,GO:0016310,GO:0016740,GO:0016772,GO:0016773,GO:0019202,GO:0019752,GO:…	K00872-ko01230 Biosynthesis of amino acids;ko00260 Glycine, serine and threonine metabolism	COG0083-Homoserine kinase[E]
GE03056	7.53	28.38	-1.91415	0.000148745	0.000381628	down	GE03056	Heme-degrading monooxygenase HmoB	GO:0003674,GO:0003824,GO:0004392,GO:0005488,GO:0005575,GO:0005618,GO:0005886,GO:0006725,GO:0006778,GO:0006787,GO:0006807,GO:0008150,GO:0008152,GO:0009056,GO:0009987,GO:0016020,GO:0016491,GO:0016705,GO:0019439,GO:0020037,GO:0030312,GO:0033013,GO:0033015,GO:0034641,GO:0042167,GO:0042168,GO:0042440,GO:0044237,GO:0044248,GO:0044270,GO:0046149,GO:0046483,GO:0046700,GO:0046906,GO:0055114,GO:0071704,GO:…	-	COG2329-Uncharacterized enzyme involved in biosynthesis of extracellular polysaccharides[R]
GE01160	7.47	19.97	-1.41865	0.000149789	0.000383871	down	GE01160	Precorrin-4 C(11)-methyltransferase	-	K05936-ko00860 Porphyrin and chlorophyll metabolism	COG2875-Precorrin-4 methylase[H]
GE03912	3.52	19.74	-2.48747	0.000161771	0.00041352	down	GE03912	Urease subunit gamma	-	K01430-ko00230 Purine metabolism;ko00220 Arginine biosynthesis;ko00791 Atrazine degradation	COG0831-Urea amidohydrolase (urease) gamma subunit[E]
GE01716	2.9	16.24	-2.48543	0.000161771	0.00041352	down	GE01716	Putative membrane protein SCO5905	-	-	-
GE02216	0.21	3.51	-4.06301	0.000164986	0.000421262	down	GE02216	Protein PS1 (Precursor)	-	-	COG0627-Predicted esterase[R]
GE02965	0.18	3.03	-4.07325	0.000164986	0.000421262	down	GE02965	hypothetical protein	-	-	-
GE02001	3.86	10.73	-1.47498	0.000165656	0.000422615	down	GE02001	Tryptophan synthase beta chain 2	-	K06001-ko01230 Biosynthesis of amino acids;ko00260 Glycine, serine and threonine metabolism;ko00400 Phenylalanine, tyrosine and tryptophan biosynthesis	COG1350-Predicted alternative tryptophan synthase beta-subunit (paralog of TrpB)[R]
GE03022	4.58	18.85	-2.04115	0.000168507	0.000429402	down	GE03022	hypothetical protein	-	-	-
GE02246	3.21	13.95	-2.11962	0.000174596	0.000443916	down	GE02246	hypothetical protein	-	-	COG1507-Uncharacterized conserved protein[S]
GE03413	3.84	10.33	-1.42766	0.000175141	0.000444926	down	GE03413	putative protein Mb1321c	-	-	COG4325-Predicted membrane protein[S]
GE00063	10.32	27.77	-1.42808	0.000175141	0.000444926	down	GE00063	hypothetical protein	-	-	-
GE02212	5.48	16.97	-1.63074	0.000181178	0.000459358	down	GE02212	UPF0073 membrane protein Mb1114c	-	-	COG1272-Predicted membrane protein, hemolysin III homolog[R]
GE01545	18.46	43.62	-1.24059	0.000184569	0.000467693	down	GE01545	hypothetical protein	-	-	-
GE01800	23.95	51.59	-1.10707	0.000189893	0.000480913	down	GE01800	hypothetical protein	-	-	COG0824-Predicted thioesterase[R]
GE04969	0.0001	13.96	-17.0909	0.000192921	0.000488172	down	GE04969	hypothetical protein	-	-	-
GE04071	0.0001	3.29	-15.0058	0.000192921	0.000488172	down	GE04071	4,5:9,10-diseco-3-hydroxy-5,9, 17-trioxoandrosta-1(10),2-diene-4-oate hydrolase	-	-	COG0596-Predicted hydrolases or acyltransferases (alpha/beta hydrolase superfamily) [R]
GE03546	12.44	25.42	-1.03098	0.000203486	0.000514184	down	GE03546	putative membrane protein Rv3835	GO:0005575,GO:0005576,GO:0005618,GO:0005886,GO:0016020,GO:0030312,GO:0071944	-	-
GE04313	2.79	8.23	-1.56063	0.000204468	0.000516376	down	GE04313	putative transporter YclF	-	-	COG3104-Dipeptide/tripeptide permease[E]
GE01746	0.39	2.92	-2.90442	0.000204964	0.00051734	down	GE01746	Arginine--tRNA ligase	GO:0003674,GO:0003824,GO:0004812,GO:0004814,GO:0005575,GO:0005622,GO:0005737,GO:0005829,GO:0005886,GO:0006082,GO:0006139,GO:0006399,GO:0006412,GO:0006418,GO:0006420,GO:0006518,GO:0006520,GO:0006725,GO:0006807,GO:0008150,GO:0008152,GO:0009058,GO:0009059,GO:0009987,GO:0010467,GO:0016020,GO:0016070,GO:0016874,GO:0016875,GO:0019538,GO:0019752,GO:0034641,GO:0034645,GO:0034660,GO:0040007,GO:0043038,GO:…	K01887-ko00970 Aminoacyl-tRNA biosynthesis	COG0018-Arginyl-tRNA synthetase[J]
GE04743	3.86	12.16	-1.65547	0.000206235	0.000519966	down	GE04743	1,4-dihydroxy-2-naphthoyl-CoA synthase	GO:0003674,GO:0003824,GO:0005575,GO:0005886,GO:0008150,GO:0008152,GO:0008935,GO:0009058,GO:0009233,GO:0009234,GO:0009987,GO:0016020,GO:0016043,GO:0016829,GO:0016830,GO:0016833,GO:0022607,GO:0034214,GO:0042180,GO:0042181,GO:0043933,GO:0044085,GO:0044237,GO:0044249,GO:0044281,GO:0044283,GO:0051259,GO:0065003,GO:0071704,GO:0071840,GO:0071944,GO:1901576,GO:1901661,GO:1901663	K01661-ko00130 Ubiquinone and other terpenoid-quinone biosynthesis	COG0447-Dihydroxynaphthoic acid synthase[H]
GE04407	8.14	17.37	-1.0935	0.00021254	0.000535562	down	GE04407	Alpha-lytic protease (Precursor)	-	-	-
GE02459	9.43	20.9	-1.14817	0.000219732	0.000553376	down	GE02459	HTH-type transcriptional regulator VirS	-	-	COG2207-AraC-type DNA-binding domain-containing proteins[K]
GE04337	6.78	16.97	-1.32363	0.000222137	0.000559121	down	GE04337	hypothetical protein	-	-	COG0053-Predicted Co/Zn/Cd cation transporters[P]
GE02262	13.77	33.76	-1.29379	0.000222752	0.000560357	down	GE02262	Histidine-specific methyltransferase EgtD	-	K18911-ko00340 Histidine metabolism	COG4301-Uncharacterized conserved protein[S]
GE00773	24.6	52.96	-1.10624	0.000224513	0.000564473	down	GE00773	Putative nitroreductase Mb1584	-	-	-
GE00483	3.68	11.82	-1.68345	0.000233806	0.000587181	down	GE00483	putative HTH-type transcriptional regulator Rv0377	-	-	-
GE01042	12.13	25.65	-1.08038	0.000237171	0.000595302	down	GE01042	NAD kinase	GO:0000166,GO:0003674,GO:0003824,GO:0003951,GO:0005488,GO:0005524,GO:0006082,GO:0006139,GO:0006725,GO:0006739,GO:0006741,GO:0006753,GO:0006793,GO:0006796,GO:0006797,GO:0006807,GO:0008144,GO:0008150,GO:0008152,GO:0009058,GO:0009117,GO:0009165,GO:0009987,GO:0016301,GO:0016310,GO:0016740,GO:0016772,GO:0016773,GO:0017076,GO:0018130,GO:0019359,GO:0019362,GO:0019363,GO:0019438,GO:0019637,GO:0030554,GO:…	K00858-ko00760 Nicotinate and nicotinamide metabolism	COG0061-Predicted sugar kinase[G]
GE03789	4.12	9.35	-1.18232	0.000237811	0.000596576	down	GE03789	Penicillin-binding protein 1A	GO:0001666,GO:0003674,GO:0005488,GO:0005575,GO:0006950,GO:0008144,GO:0008150,GO:0008658,GO:0009628,GO:0009987,GO:0030288,GO:0030313,GO:0031406,GO:0031975,GO:0033218,GO:0033293,GO:0033554,GO:0036094,GO:0036293,GO:0036294,GO:0042221,GO:0042597,GO:0043167,GO:0043168,GO:0043177,GO:0050896,GO:0051716,GO:0070482,GO:0070887,GO:0071453,GO:0071456,GO:0097159,GO:1901363,GO:1901681	-	COG0744-Membrane carboxypeptidase (penicillin-binding protein)[M]
GE02149	5.5	12.66	-1.20277	0.000245697	0.000616016	down	GE02149	Baeyer-Villiger monooxygenase	-	-	COG2072-Predicted flavoprotein involved in K+ transport[P]
GE01689	1.24	7.6	-2.61566	0.000248046	0.000621045	down	GE01689	tRNA (guanine-N(1)-)-methyltransferase	GO:0001510,GO:0003674,GO:0003824,GO:0006139,GO:0006396,GO:0006399,GO:0006400,GO:0006725,GO:0006807,GO:0008033,GO:0008150,GO:0008152,GO:0008168,GO:0008173,GO:0008175,GO:0008757,GO:0009019,GO:0009451,GO:0009987,GO:0010467,GO:0016070,GO:0016423,GO:0016740,GO:0016741,GO:0016772,GO:0016779,GO:0030488,GO:0032259,GO:0034470,GO:0034641,GO:0034660,GO:0040007,GO:0043170,GO:0043412,GO:0043414,GO:0044237,GO:…	-	COG0336-tRNA-(guanine-N1)-methyltransferase[J]
GE01532	1.41	8.69	-2.62366	0.000248046	0.000621045	down	GE01532	Biotin transporter BioY	-	K03523-ko02010 ABC transporters	COG1268-Uncharacterized conserved protein[R]
GE02546	0.58	3.57	-2.6218	0.000248046	0.000621045	down	GE02546	Guanine/hypoxanthine permease PbuG	-	-	COG2252-Permeases[R]
GE04839	0.58	3.56	-2.61775	0.000248046	0.000621045	down	GE04839	Putative aldehyde dehydrogenase DhaS	-	K00146-ko00360 Phenylalanine metabolism;ko00643 Styrene degradation	COG1012-NAD-dependent aldehyde dehydrogenases[C]
GE04791	6.2	13.6	-1.13327	0.000248396	0.000621058	down	GE04791	putative carboxylase YngE	-	-	COG4799-Acetyl-CoA carboxylase, carboxyltransferase component (subunits alpha and beta)[I]
GE01515	2.55	9.71	-1.92897	0.0002528	0.000631719	down	GE01515	Glutamate-binding protein (Precursor)	-	K10005-ko02010 ABC transporters	COG0834-ABC-type amino acid transport/signal transduction systems, periplasmic component/domain[ET]
GE01090	3.14	10.32	-1.71661	0.000263794	0.000658464	down	GE01090	hypothetical protein	-	-	-
GE00183	22.67	45.35	-1.00032	0.000269346	0.00067195	down	GE00183	hypothetical protein	-	-	-
GE03414	3.12	12.45	-1.99653	0.000269964	0.00067312	down	GE03414	putative HTH-type transcriptional regulator YdcN	-	-	COG1476-Predicted transcriptional regulators[K]
GE02898	8.04	24.37	-1.59984	0.000270052	0.000672969	down	GE02898	putative HIT-like protein ML2237	-	-	COG0537-Diadenosine tetraphosphate (Ap4A) hydrolase and other HIT family hydrolases[FGR]
GE00119	10.04	20.72	-1.04526	0.000274466	0.00068359	down	GE00119	2-aminoadipate transaminase	-	K05825-ko01210 2-Oxocarboxylic acid metabolism;ko01230 Biosynthesis of amino acids;ko00300 Lysine biosynthesis	COG1167-Transcriptional regulators containing a DNA-binding HTH domain and an aminotransferase domain (MocR family) and their eukaryotic orthologs[KE]
GE01332	15.45	31.47	-1.02637	0.000283028	0.000704138	down	GE01332	Orotidine 5'-phosphate decarboxylase	-	K01591-ko00240 Pyrimidine metabolism	-
GE00591	4.19	20.33	-2.27859	0.000288742	0.000717958	down	GE00591	hypothetical protein	-	-	-
GE01599	1.62	7.25	-2.16199	0.000290337	0.000721327	down	GE01599	hypothetical protein	-	-	COG3662-Uncharacterized protein conserved in bacteria[S]
GE02520	1.26	5.64	-2.16227	0.000290337	0.000721327	down	GE02520	putative N-methylproline demethylase	-	-	COG1902-NADH:flavin oxidoreductases, Old Yellow Enzyme family[C]
GE02118	1.06	3.58	-1.7559	0.000295934	0.000734222	down	GE02118	hypothetical protein	-	-	-
GE01923	10.8	27.93	-1.37078	0.000302672	0.000750114	down	GE01923	hypothetical protein	-	-	-
GE01608	8.11	20.46	-1.33503	0.000308182	0.000762933	down	GE01608	UPF0246 protein Cgl1995/cg2186	GO:0005575,GO:0005622,GO:0005737,GO:0005829,GO:0006950,GO:0006979,GO:0008150,GO:0033194,GO:0042221,GO:0050896,GO:1901700	-	COG3022-Uncharacterized protein conserved in bacteria[S]
GE03696	9.2	28.35	-1.62364	0.000309011	0.000764564	down	GE03696	Steroid Delta-isomerase	-	K01822-ko00140 Steroid hormone biosynthesis;ko00984 Steroid degradation	-
GE00459	0.97	15.24	-3.97373	0.00030924	0.000764293	down	GE00459	hypothetical protein	-	-	-
GE02519	0.26	4.03	-3.9542	0.00030924	0.000764293	down	GE02519	hypothetical protein	-	-	-
GE01614	0.35	5.5	-3.974	0.00030924	0.000764293	down	GE01614	Cob(I)yrinic acid a,c-diamide adenosyltransferase	-	K19221-ko00860 Porphyrin and chlorophyll metabolism	COG2109-ATP:corrinoid adenosyltransferase[H]
GE04788	12.92	27.75	-1.10288	0.000314022	0.000775262	down	GE04788	putative protein Mb0037c	GO:0005575,GO:0005618,GO:0005886,GO:0016020,GO:0030312,GO:0071944	-	-
GE01887	9.27	32.04	-1.78923	0.000329717	0.000812455	down	GE01887	hypothetical protein	-	-	COG2388-Predicted acetyltransferase[R]
GE03196	3.7	12.79	-1.78942	0.000329717	0.000812455	down	GE03196	Endonuclease III	GO:0003674,GO:0003676,GO:0003677,GO:0003690,GO:0003824,GO:0005488,GO:0005575,GO:0005618,GO:0005886,GO:0006139,GO:0006259,GO:0006281,GO:0006725,GO:0006807,GO:0006950,GO:0006974,GO:0008150,GO:0008152,GO:0009987,GO:0016020,GO:0016787,GO:0016798,GO:0016799,GO:0019104,GO:0030312,GO:0033554,GO:0034641,GO:0043170,GO:0044237,GO:0044238,GO:0044260,GO:0046483,GO:0050896,GO:0051716,GO:0071704,GO:0071944,GO:…	K10773-ko03410 Base excision repair	COG0177-Predicted EndoIII-related endonuclease[L]
GE02009	10.79	21.93	-1.02321	0.000333843	0.0008215	down	GE02009	hypothetical protein	-	-	COG3616-Predicted amino acid aldolase or racemase[E]
GE00882	5.28	16.58	-1.65083	0.000352327	0.000864864	down	GE00882	hypothetical protein	-	-	-
GE03994	6.41	20.14	-1.65167	0.000352327	0.000864864	down	GE03994	Methylated-DNA--protein-cysteine methyltransferase	GO:0003674,GO:0003824,GO:0003908,GO:0005575,GO:0005886,GO:0006139,GO:0006259,GO:0006281,GO:0006304,GO:0006307,GO:0006725,GO:0006807,GO:0006950,GO:0006974,GO:0008150,GO:0008152,GO:0008168,GO:0008172,GO:0009987,GO:0016020,GO:0016740,GO:0016741,GO:0032259,GO:0033554,GO:0034641,GO:0035510,GO:0043170,GO:0043412,GO:0044237,GO:0044238,GO:0044260,GO:0046483,GO:0050896,GO:0051409,GO:0051716,GO:0071704,GO:…	-	COG0350-Methylated DNA-protein cysteine methyltransferase[L]
GE03780	4.19	10.91	-1.38063	0.000355564	0.000872098	down	GE03780	Trehalose-binding lipoprotein LpqY (Precursor)	-	-	COG1653-ABC-type sugar transport system, periplasmic component[G]
GE01759	0.0001	3.7	-15.1752	0.000357345	0.000875752	down	GE01759	1,6-dihydroxycyclohexa-2,4-diene-1-carboxylate dehydrogenase	GO:0003674,GO:0003824,GO:0004799,GO:0006725,GO:0006807,GO:0006950,GO:0006979,GO:0008150,GO:0008152,GO:0008168,GO:0009987,GO:0016491,GO:0016645,GO:0016646,GO:0016740,GO:0016741,GO:0019889,GO:0032259,GO:0033554,GO:0034599,GO:0042083,GO:0042221,GO:0042558,GO:0044237,GO:0046483,GO:0047040,GO:0050896,GO:0051716,GO:0055114,GO:0070887,GO:0071704,GO:1901360,GO:1901564	-	COG4221-Short-chain alcohol dehydrogenase of unknown specificity[R]
GE03128	0.0001	4.43	-15.435	0.000357345	0.000875752	down	GE03128	putative HTH-type transcriptional regulator in unstable DNA locus	-	-	COG1802-Transcriptional regulators[K]
GE01399	5.47	12.11	-1.14659	0.000364207	0.000891843	down	GE01399	Protein translocase subunit SecD	GO:0005575,GO:0005576,GO:0005618,GO:0005622,GO:0005737,GO:0005829,GO:0005886,GO:0005887,GO:0006810,GO:0008104,GO:0008150,GO:0015031,GO:0015833,GO:0016020,GO:0016021,GO:0030312,GO:0031224,GO:0031226,GO:0033036,GO:0042886,GO:0045184,GO:0051179,GO:0051234,GO:0071702,GO:0071705,GO:0071944	K03072-ko03060 Protein export;ko03070 Bacterial secretion system	COG0342-Preprotein translocase subunit SecD[U]
GE02495	2.97	10.6	-1.83553	0.0003643	0.000891586	down	GE02495	Fatty acyl-CoA reductase	-	-	COG0300-Short-chain dehydrogenases of various substrate specificities[R]
GE01510	13.67	29.34	-1.10186	0.000371492	0.000908204	down	GE01510	hypothetical protein	-	-	-
GE02608	1.74	6.45	-1.89021	0.00039839	0.000971594	down	GE02608	Steroid C26-monooxygenase	-	K15981-ko00984 Steroid degradation	COG2124-Cytochrome P450[Q]
GE01609	2.49	9.2	-1.88549	0.00039839	0.000971594	down	GE01609	putative protein Cgl0250/cg0304	-	-	-
GE02201	7.34	23.52	-1.68004	0.000400017	0.000974244	down	GE02201	4-carboxymuconolactone decarboxylase	-	K01607-ko01220 Degradation of aromatic compounds;ko00362 Benzoate degradation	COG0599-Uncharacterized homolog of gamma-carboxymuconolactone decarboxylase subunit[S]
GE03961	16.11	42.15	-1.38758	0.000417548	0.00101421	down	GE03961	hypothetical protein	-	-	-
GE04213	6.07	15.43	-1.34597	0.000427361	0.00103692	down	GE04213	hypothetical protein	-	-	-
GE04434	2.08	8.03	-1.94882	0.000430103	0.00104302	down	GE04434	Iron-dependent extradiol dioxygenase	-	-	-
GE03389	7.95	19.32	-1.28107	0.000430843	0.00104369	down	GE03389	putative protein Mb1524	-	-	COG0330-Membrane protease subunits, stomatin/prohibitin homologs[O]
GE01466	2.32	7.61	-1.71377	0.000451865	0.00109344	down	GE01466	K(+)/H(+) antiporter YhaU	-	-	COG4651-Kef-type K+ transport system, predicted NAD-binding component[P]
GE01874	1.47	7.59	-2.36828	0.000466909	0.00112894	down	GE01874	Transcriptional regulator NanR	-	-	COG2186-Transcriptional regulators[K]
GE01579	0.69	3.56	-2.36721	0.000466909	0.00112894	down	GE01579	Tetracenomycin C resistance and export protein	-	-	-
GE00530	3.75	10.22	-1.44643	0.000469159	0.00113316	down	GE00530	hypothetical protein	-	-	-
GE01927	8.87	24.16	-1.44561	0.000469159	0.00113316	down	GE01927	HTH-type transcriptional regulator PetP	-	-	-
GE03892	0.36	3.25	-3.17437	0.000495498	0.00119199	down	GE03892	Putative aminoglycoside phosphotransferase	-	-	COG3173-Predicted aminoglycoside phosphotransferase[R]
GE01172	2.63	8.84	-1.74898	0.00050732	0.00121914	down	GE01172	Protein PafC	GO:0005575,GO:0005618,GO:0030312,GO:0071944	-	COG2378-Predicted transcriptional regulator[K]
GE01253	5.96	16.37	-1.45767	0.000547943	0.00131326	down	GE01253	3-oxoacyl-[acyl-carrier-protein] reductase FabG1	GO:0000166,GO:0003674,GO:0003824,GO:0004312,GO:0004316,GO:0005488,GO:0005575,GO:0005886,GO:0006082,GO:0006629,GO:0006631,GO:0006633,GO:0008150,GO:0008152,GO:0008610,GO:0009058,GO:0009059,GO:0009273,GO:0009987,GO:0016020,GO:0016053,GO:0016491,GO:0016614,GO:0016616,GO:0016740,GO:0016746,GO:0016747,GO:0018454,GO:0019752,GO:0030497,GO:0032787,GO:0034645,GO:0036094,GO:0042546,GO:0043167,GO:0043168,GO:…	-	COG1028-Dehydrogenases with different specificities (related to short-chain alcohol dehydrogenases)[IQR]
GE02580	9.39	20.32	-1.1137	0.000549003	0.0013151	down	GE02580	Phytoene synthase	-	K02291-ko00906 Carotenoid biosynthesis	COG1562-Phytoene/squalene synthetase[I]
GE03873	5.19	11.81	-1.1862	0.000553014	0.00132401	down	GE03873	Transcriptional activator PmfR	-	-	COG2508-Regulator of polyketide synthase expression[TQ]
GE00705	6.71	15.49	-1.20695	0.000570894	0.00136284	down	GE00705	Anthranilate phosphoribosyltransferase	GO:0000162,GO:0003674,GO:0003824,GO:0004048,GO:0005575,GO:0005576,GO:0005886,GO:0006082,GO:0006520,GO:0006568,GO:0006576,GO:0006586,GO:0006725,GO:0006807,GO:0008150,GO:0008152,GO:0008652,GO:0009058,GO:0009072,GO:0009073,GO:0009308,GO:0009309,GO:0009987,GO:0016020,GO:0016053,GO:0016740,GO:0016757,GO:0016763,GO:0018130,GO:0019438,GO:0019752,GO:0034641,GO:0040007,GO:0042401,GO:0042430,GO:0042435,GO:…	K00766-ko01230 Biosynthesis of amino acids;ko00400 Phenylalanine, tyrosine and tryptophan biosynthesis	COG0547-Anthranilate phosphoribosyltransferase[E]
GE02957	8.01	18.49	-1.20687	0.000570894	0.00136284	down	GE02957	Putative short-chain type dehydrogenase/reductase Rv0148	GO:0003674,GO:0003824,GO:0004303,GO:0005488,GO:0005515,GO:0005575,GO:0005622,GO:0005737,GO:0005777,GO:0006066,GO:0006629,GO:0007568,GO:0008150,GO:0008152,GO:0008202,GO:0008203,GO:0009719,GO:0009725,GO:0009987,GO:0010033,GO:0014070,GO:0016125,GO:0016229,GO:0016491,GO:0016614,GO:0016616,GO:0016829,GO:0016835,GO:0016836,GO:0018812,GO:0030283,GO:0032502,GO:0033764,GO:0033993,GO:0042221,GO:0042493,GO:…	-	COG1028-Dehydrogenases with different specificities (related to short-chain alcohol dehydrogenases)[IQR]
GE03470	5.2	13.77	-1.40495	0.00057504	0.00137165	down	GE03470	Galactofuranosyl transferase GlfT1	GO:0003674,GO:0003824,GO:0005575,GO:0005886,GO:0008150,GO:0008152,GO:0008378,GO:0009058,GO:0009059,GO:0009987,GO:0016020,GO:0016043,GO:0016740,GO:0016757,GO:0016758,GO:0034645,GO:0040007,GO:0042546,GO:0043170,GO:0044036,GO:0044038,GO:0044085,GO:0044237,GO:0044249,GO:0044260,GO:0045229,GO:0070589,GO:0071554,GO:0071555,GO:0071704,GO:0071840,GO:0071944,GO:1901576	-	COG1216-Predicted glycosyltransferases[R]
GE00505	0.23	3.33	-3.85582	0.0005806	0.00138272	down	GE00505	2,3-dihydroxyphenylpropionate/2, 3-dihydroxicinnamic acid 1,2-dioxygenase	-	K05713-ko01220 Degradation of aromatic compounds;ko00360 Phenylalanine metabolism	-
GE00791	0.55	7.93	-3.84982	0.0005806	0.00138272	down	GE00791	hypothetical protein	-	-	-
GE03914	0.1	1.45	-3.85798	0.0005806	0.00138272	down	GE03914	Urease subunit alpha	-	K01428-ko00230 Purine metabolism;ko00220 Arginine biosynthesis;ko00791 Atrazine degradation;ko05120 Epithelial cell signaling in Helicobacter pylori infection	COG0804-Urea amidohydrolase (urease) alpha subunit[E]
GE01142	0.41	6.05	-3.88324	0.0005806	0.00138272	down	GE01142	hypothetical protein	-	-	-
GE03405	0.26	3.82	-3.87699	0.0005806	0.00138272	down	GE03405	hypothetical protein	-	-	-
GE01058	11.16	26.19	-1.23068	0.000585569	0.00139235	down	GE01058	putative Nudix hydrolase NudL	-	-	-
GE02092	7.59	15.45	-1.02544	0.000588304	0.00139738	down	GE02092	UPF0699 transmembrane protein YdbT	-	-	COG3428-Predicted membrane protein[S]
GE01150	2.46	7.13	-1.53524	0.000590706	0.00140197	down	GE01150	Precorrin-3B C17-methyltransferase	GO:0005575,GO:0005886,GO:0016020,GO:0071944	K13540-ko00860 Porphyrin and chlorophyll metabolism	COG1010-Precorrin-3B methylase[H]
GE01714	2.53	7.35	-1.53861	0.000590706	0.00140197	down	GE01714	hypothetical protein	-	-	-
GE00618	4.68	11.43	-1.28824	0.00060152	0.00142577	down	GE00618	Deoxyguanosinetriphosphate triphosphohydrolase-like protein	GO:0003674,GO:0003824,GO:0005575,GO:0005886,GO:0006139,GO:0006163,GO:0006195,GO:0006203,GO:0006725,GO:0006753,GO:0006793,GO:0006796,GO:0006807,GO:0008150,GO:0008152,GO:0008832,GO:0009056,GO:0009058,GO:0009117,GO:0009141,GO:0009143,GO:0009144,GO:0009146,GO:0009151,GO:0009155,GO:0009166,GO:0009200,GO:0009204,GO:0009215,GO:0009217,GO:0009262,GO:0009264,GO:0009394,GO:0009987,GO:0016020,GO:0016787,GO:…	K01129-ko00230 Purine metabolism	COG0232-dGTP triphosphohydrolase[F]
GE01357	1.92	5.98	-1.63904	0.000603224	0.00142868	down	GE01357	Heme-binding protein A (Precursor)	-	K02035-ko02024 Quorum sensing	COG0747-ABC-type dipeptide transport system, periplasmic component[E]
GE02977	2.65	8.26	-1.64015	0.000603224	0.00142868	down	GE02977	Acyl-CoA dehydrogenase	-	-	COG1960-Acyl-CoA dehydrogenases[I]
GE02292	21.08	45.1	-1.09725	0.000615878	0.00145597	down	GE02292	putative HTH-type transcriptional regulator YkoM	-	-	COG1846-Transcriptional regulators[K]
GE01371	2.1	7.54	-1.84418	0.000624193	0.00147255	down	GE01371	putative protein Mb2609c	-	-	-
GE01243	4.23	15.16	-1.84154	0.000624193	0.00147255	down	GE01243	hypothetical protein	-	-	-
GE02578	1.72	6.15	-1.83818	0.000624193	0.00147255	down	GE02578	Putative ABC transporter-binding protein HI_1085	-	K02067-ko02010 ABC transporters	COG1463-ABC-type transport system involved in resistance to organic solvents, periplasmic component[Q]
GE03826	0.54	3.62	-2.74496	0.000645073	0.00151823	down	GE03826	2,5-dichloro-2,5-cyclohexadiene-1,4-diol dehydrogenase	-	-	COG1028-Dehydrogenases with different specificities (related to short-chain alcohol dehydrogenases)[IQR]
GE04094	0.71	4.75	-2.74204	0.000645073	0.00151823	down	GE04094	putative protein Mb0978c	-	-	COG2141-Coenzyme F420-dependent N5,N10-methylene tetrahydromethanopterin reductase and related flavin-dependent oxidoreductases[C]
GE02979	6.64	15.09	-1.18434	0.000655193	0.00154085	down	GE02979	Acyl-CoA dehydrogenase	-	-	COG1960-Acyl-CoA dehydrogenases[I]
GE03256	0.0001	20.6	-17.6523	0.000666447	0.00156487	down	GE03256	hypothetical protein	-	-	-
GE03280	0.0001	11.36	-16.7936	0.000666447	0.00156487	down	GE03280	hypothetical protein	-	-	-
GE03381	0.0001	5.64	-15.7834	0.000666447	0.00156487	down	GE03381	putative protein Mb2590	-	-	COG5473-Predicted integral membrane protein[S]
GE02970	0.0001	3.82	-15.2213	0.000666447	0.00156487	down	GE02970	putative 37.1 kDa protein in transposon TN4556	-	-	COG2226-Methylase involved in ubiquinone/menaquinone biosynthesis[H]
GE01823	0.0001	6.92	-16.0785	0.000666447	0.00156487	down	GE01823	hypothetical protein	-	-	-
GE04102	4.34	16.22	-1.90201	0.000681213	0.00159622	down	GE04102	hypothetical protein	-	-	-
GE00256	1.97	11.03	-2.48517	0.000740798	0.00172464	down	GE00256	hypothetical protein	-	-	COG4270-Predicted membrane protein[S]
GE04087	0.99	5.53	-2.48178	0.000740798	0.00172464	down	GE04087	(R)-specific enoyl-CoA hydratase	-	-	-
GE03312	1.06	5.97	-2.49367	0.000740798	0.00172464	down	GE03312	putative ABC transporter permease protein RBE_1340	-	K02066-ko02010 ABC transporters	COG0767-ABC-type transport system involved in resistance to organic solvents, permease component[Q]
GE00673	1.01	5.69	-2.49407	0.000740798	0.00172464	down	GE00673	Hydroxyethylthiazole kinase	-	K00878-ko00730 Thiamine metabolism	COG2145-Hydroxyethylthiazole kinase, sugar kinase family[H]
GE00435	16.55	35.74	-1.11071	0.00077018	0.00178798	down	GE00435	Glutathione peroxidase	-	K00432-ko00590 Arachidonic acid metabolism;ko00480 Glutathione metabolism;ko04918 Thyroid hormone synthesis	COG0386-Glutathione peroxidase[O]
GE00706	15.62	42.02	-1.42768	0.000790063	0.00183319	down	GE00706	hypothetical protein	-	-	COG1522-Transcriptional regulators[K]
GE00930	1.46	6.53	-2.16111	0.000793765	0.00183989	down	GE00930	Putative mycofactocin biosynthesis glycosyltransferase MftF	-	-	COG1216-Predicted glycosyltransferases[R]
GE04580	1.64	7.35	-2.16405	0.000793765	0.00183989	down	GE04580	CDP-diacylglycerol--serine O-phosphatidyltransferase	GO:0003674,GO:0003824,GO:0003882,GO:0005575,GO:0005576,GO:0005622,GO:0005737,GO:0005886,GO:0006629,GO:0006644,GO:0006650,GO:0006793,GO:0006796,GO:0008150,GO:0008152,GO:0008610,GO:0008654,GO:0009058,GO:0009987,GO:0016020,GO:0016740,GO:0016772,GO:0016780,GO:0017169,GO:0019637,GO:0044237,GO:0044238,GO:0044249,GO:0044255,GO:0045017,GO:0046474,GO:0046486,GO:0071704,GO:0071944,GO:0090407,GO:1901576	K17103-ko00564 Glycerophospholipid metabolism;ko00260 Glycine, serine and threonine metabolism	COG1183-Phosphatidylserine synthase[I]
GE04355	3.45	15.46	-2.16387	0.000793765	0.00183989	down	GE04355	hypothetical protein	-	-	-
GE01711	16.77	34.52	-1.04155	0.000797054	0.00184467	down	GE01711	hypothetical protein	-	-	-
GE04712	8.73	22.69	-1.378	0.000819785	0.00189582	down	GE04712	hypothetical protein	-	-	COG0456-Acetyltransferases[R]
GE02634	9.3	24.16	-1.37732	0.000819785	0.00189582	down	GE02634	putative HTH-type transcriptional regulator Mb0790c	GO:0000976,GO:0001067,GO:0003674,GO:0003676,GO:0003677,GO:0003690,GO:0003700,GO:0005488,GO:0005575,GO:0005622,GO:0005737,GO:0005829,GO:0006355,GO:0008150,GO:0009889,GO:0010468,GO:0010556,GO:0019219,GO:0019222,GO:0031323,GO:0031326,GO:0043565,GO:0050789,GO:0050794,GO:0051171,GO:0051252,GO:0060255,GO:0065007,GO:0080090,GO:0097159,GO:0140110,GO:1901363,GO:1903506,GO:1990837,GO:2000112,GO:2001141	-	-
GE00813	11.41	32.36	-1.50391	0.000866543	0.00200036	down	GE00813	hypothetical protein	-	-	-
GE00580	7.96	17.84	-1.16428	0.000886733	0.00204383	down	GE00580	Sulfate/thiosulfate import ATP-binding protein CysA	-	K02045-ko00920 Sulfur metabolism;ko02010 ABC transporters	COG1118-ABC-type sulfate/molybdate transport systems, ATPase component[P]
GE01873	0.26	2.17	-3.06111	0.000902285	0.00207862	down	GE01873	L-lactate permease	-	-	COG1620-L-lactate permease[C]
GE01671	2.62	7.97	-1.60501	0.000904415	0.00208246	down	GE01671	putative MFS-type transporter YdgK	-	-	-
GE03442	7.55	15.51	-1.03865	0.000942388	0.00216327	down	GE03442	UPF0053 protein MT1890	-	-	COG1253-Hemolysins and related proteins containing CBS domains[R]
GE01470	4.72	10.29	-1.12438	0.000960822	0.00220447	down	GE01470	putative protein MT2985	GO:0005575,GO:0005886,GO:0016020,GO:0071944	-	COG1061-DNA or RNA helicases of superfamily II[KL]
GE02423	7.15	18.7	-1.38702	0.000964003	0.00221064	down	GE02423	Transcriptional regulatory protein DevR (DosR)	-	-	COG2197-Response regulator containing a CheY-like receiver domain and an HTH DNA-binding domain[TK]
GE00766	2.1	7.3	-1.79751	0.000972016	0.00222619	down	GE00766	Acetyl esterase	-	-	COG0657-Esterase/lipase[I]
GE04025	3.15	10.95	-1.79751	0.000972016	0.00222619	down	GE04025	hypothetical protein	-	-	COG1414-Transcriptional regulator[K]
GE01554	10.39	26.34	-1.34206	0.000985838	0.00225556	down	GE01554	Flavodoxin	-	-	-
GE01933	2.88	7.3	-1.34183	0.000985838	0.00225556	down	GE01933	Allophanate hydrolase	-	K01457-ko00220 Arginine biosynthesis;ko00791 Atrazine degradation	COG0154-Asp-tRNAAsn/Glu-tRNAGln amidotransferase A subunit and related amidases[J]
GE01488	8.54	20.58	-1.26894	0.000987821	0.00225723	down	GE01488	hypothetical protein	-	-	-
GE04696	7.32	21.03	-1.52253	0.00100632	0.00229602	down	GE04696	hypothetical protein	-	-	-
GE00180	6.46	13.77	-1.09192	0.00102327	0.00233234	down	GE00180	Coenzyme F420:L-glutamate ligase	GO:0005575,GO:0005886,GO:0008150,GO:0008152,GO:0009058,GO:0009987,GO:0016020,GO:0044237,GO:0044249,GO:0071944	K12234-ko00680 Methane metabolism	COG1478-Uncharacterized conserved protein[S]
GE02053	5.75	12.88	-1.1635	0.00105153	0.00239553	down	GE02053	Magnesium transporter MgtE	-	-	COG2239-Mg/Co/Ni transporter MgtE (contains CBS domain)[P]
GE01279	4.86	13.32	-1.45457	0.0010819	0.00246348	down	GE01279	hypothetical protein	-	-	-
GE02279	0.32	4.29	-3.74483	0.00109174	0.00248401	down	GE02279	hypothetical protein	-	-	-
GE01497	0.22	2.9	-3.72048	0.00109174	0.00248401	down	GE01497	Ribose operon repressor	-	-	COG1609-Transcriptional regulators[K]
GE01266	0.62	3.96	-2.67516	0.00113709	0.00258069	down	GE01266	Lycopene beta cyclase	-	K06443-ko00906 Carotenoid biosynthesis	-
GE02498	0.8	5.05	-2.65821	0.00113709	0.00258069	down	GE02498	putative enoyl-CoA hydratase echA8	-	-	COG1024-Enoyl-CoA hydratase/carnithine racemase[I]
GE04591	0.67	4.28	-2.67538	0.00113709	0.00258069	down	GE04591	Transcriptional regulator AzlB	-	-	COG1522-Transcriptional regulators[K]
GE01050	0.78	4.96	-2.66879	0.00113709	0.00258069	down	GE01050	Segregation and condensation protein A	-	-	COG1354-Uncharacterized conserved protein[S]
GE03544	4.76	11.26	-1.24217	0.00115256	0.00261185	down	GE03544	Serine--tRNA ligase	GO:0005575,GO:0005886,GO:0008150,GO:0016020,GO:0040007,GO:0071944	K01875-ko00970 Aminoacyl-tRNA biosynthesis	COG0172-Seryl-tRNA synthetase[J]
GE00993	6.73	15.89	-1.23944	0.00115256	0.00261185	down	GE00993	Glutamine-binding periplasmic protein (Precursor)	-	-	COG0834-ABC-type amino acid transport/signal transduction systems, periplasmic component/domain[ET]
GE05033	15.39	44.87	-1.54376	0.00116614	0.00263932	down	GE05033	hypothetical protein	-	-	-
GE03101	6.57	19.15	-1.54338	0.00116614	0.00263932	down	GE03101	Inorganic pyrophosphatase	GO:0000287,GO:0003674,GO:0003824,GO:0004427,GO:0005488,GO:0005575,GO:0005622,GO:0005737,GO:0005829,GO:0005886,GO:0006793,GO:0006796,GO:0008150,GO:0008152,GO:0009987,GO:0016020,GO:0016462,GO:0016787,GO:0016817,GO:0016818,GO:0043167,GO:0043169,GO:0044237,GO:0046872,GO:0071944	K01507-ko00190 Oxidative phosphorylation	COG0221-Inorganic pyrophosphatase[C]
GE03113	5.82	16.98	-1.54475	0.00116614	0.00263932	down	GE03113	NADH:riboflavin 5'-phosphate oxidoreductase	-	-	COG1853-Conserved protein/domain typically associated with flavoprotein oxygenases, DIM6/NTAB family[R]
GE00171	2.13	6.78	-1.67043	0.00117986	0.00266635	down	GE00171	Beta-ketothiolase BktB	-	K00626-ko01200 Carbon metabolism;ko01212 Fatty acid metabolism;ko00620 Pyruvate metabolism;ko00630 Glyoxylate and dicarboxylate metabolism;ko00640 Propanoate metabolism;ko00650 Butanoate metabolism;ko00720 Carbon fixation pathways in prokaryotes;ko00071 Fatty acid degradation;ko00072 Synthesis and degradation of ketone bodies;ko00280 Valine, leucine and isoleucine degradation;ko00310 Lysine degra…	COG0183-Acetyl-CoA acetyltransferase[I]
GE03927	2.21	7.02	-1.66742	0.00117986	0.00266635	down	GE03927	Maleylacetate reductase 1	-	-	COG1454-Alcohol dehydrogenase, class IV[C]
GE01121	2.07	6.58	-1.66846	0.00117986	0.00266635	down	GE01121	putative inactive lipase MT1628	-	-	-
GE02534	1.18	4.72	-2	0.0012484	0.00281701	down	GE02534	Enterobactin exporter EntS	-	-	-
GE00985	1.26	5.06	-2.00571	0.0012484	0.00281701	down	GE00985	hypothetical protein	-	-	COG0183-Acetyl-CoA acetyltransferase[I]
GE02862	1.06	4.26	-2.00679	0.0012484	0.00281701	down	GE02862	putative MFS-type transporter YusP	-	-	-
GE02875	0.0001	1.63	-13.9926	0.00125208	0.00282249	down	GE02875	Amino-acid permease RocE	-	-	-
GE03424	2.72	7.54	-1.47096	0.00126396	0.00284785	down	GE03424	Glutamyl-tRNA(Gln) amidotransferase subunit A	-	K02433-ko00970 Aminoacyl-tRNA biosynthesis	COG0154-Asp-tRNAAsn/Glu-tRNAGln amidotransferase A subunit and related amidases[J]
GE03314	1.1	5.86	-2.4134	0.00127009	0.00285882	down	GE03314	1,2-epoxyphenylacetyl-CoA isomerase	-	-	COG1024-Enoyl-CoA hydratase/carnithine racemase[I]
GE02846	1.15	6.15	-2.41895	0.00127009	0.00285882	down	GE02846	Tetracycline repressor protein class E	-	-	-
GE00466	0.64	3.41	-2.41363	0.00127009	0.00285882	down	GE00466	Diaminopimelate decarboxylase	-	K01586-ko01230 Biosynthesis of amino acids;ko00300 Lysine biosynthesis	COG0019-Diaminopimelate decarboxylase[E]
GE03603	2.66	11.43	-2.10333	0.00130413	0.00292813	down	GE03603	hypothetical protein	-	-	-
GE03278	0.6	2.55	-2.08746	0.00130413	0.00292813	down	GE03278	Arylsulfatase	-	K01130-ko00140 Steroid hormone biosynthesis;ko00600 Sphingolipid metabolism	COG3119-Arylsulfatase A and related enzymes[P]
GE03396	2.26	9.7	-2.10166	0.00130413	0.00292813	down	GE03396	Membrane protein YdfJ	-	-	-
GE03241	2.53	11.91	-2.23496	0.00131819	0.00295088	down	GE03241	hypothetical protein	-	-	-
GE01013	8.16	38.44	-2.23597	0.00131819	0.00295088	down	GE01013	hypothetical protein	-	-	-
GE02285	0.66	3.13	-2.24562	0.00131819	0.00295088	down	GE02285	Putative type I restriction enzyme HindVIIP M protein	-	-	COG0286-Type I restriction-modification system methyltransferase subunit[V]
GE02514	6.59	21.48	-1.70464	0.00133684	0.00298819	down	GE02514	hypothetical protein	-	-	-
GE04456	10.9	25.79	-1.24248	0.00136604	0.00304969	down	GE04456	Orotate phosphoribosyltransferase	-	K00762-ko00240 Pyrimidine metabolism	COG0461-Orotate phosphoribosyltransferase[F]
GE00561	13.95	33.02	-1.24307	0.00136604	0.00304969	down	GE00561	Ribosomal silencing factor RsfS	-	-	COG0799-Uncharacterized homolog of plant Iojap protein[S]
GE01097	2.9	9.74	-1.74787	0.00150394	0.00334183	down	GE01097	hypothetical protein	-	-	-
GE01568	4.72	10.75	-1.18748	0.00153644	0.00340903	down	GE01568	DNA-damage-inducible protein F	-	-	COG0534-Na+-driven multidrug efflux pump[V]
GE04790	3.75	9.67	-1.36663	0.001616	0.00357589	down	GE04790	putative acyl-CoA dehydrogenase YngJ	-	K00249-ko01200 Carbon metabolism;ko01212 Fatty acid metabolism;ko00640 Propanoate metabolism;ko00071 Fatty acid degradation;ko00280 Valine, leucine and isoleucine degradation;ko00410 beta-Alanine metabolism;ko03320 PPAR signaling pathway	COG1960-Acyl-CoA dehydrogenases[I]
GE01884	11.41	29.4	-1.36552	0.001616	0.00357589	down	GE01884	hypothetical protein	-	-	-
GE02399	0.45	3.51	-2.96347	0.00163821	0.00362059	down	GE02399	Daunorubicin/doxorubicin resistance ATP-binding protein DrrA	-	-	COG1131-ABC-type multidrug transport system, ATPase component[V]
GE00296	13.06	32.62	-1.3206	0.00164002	0.00362282	down	GE00296	Putative fluoride ion transporter CrcB 1	-	-	-
GE00586	1.99	6.15	-1.62782	0.00178234	0.00392663	down	GE00586	Adenylyl-sulfate kinase	-	K00956-ko00920 Sulfur metabolism;ko00230 Purine metabolism;ko00450 Selenocompound metabolism;ko00261 Monobactam biosynthesis	COG2895-GTPases - Sulfate adenylate transferase subunit 1[P]
GE03755	2.45	7.55	-1.62369	0.00178234	0.00392663	down	GE03755	putative ABC transporter permease protein YclO	-	K02015-ko02010 ABC transporters	COG4605-ABC-type enterochelin transport system, permease component[P]
GE02151	11.6	24.1	-1.05491	0.00178463	0.00392879	down	GE02151	hypothetical protein	-	-	-
GE03011	2.86	10.42	-1.86527	0.00184732	0.00406087	down	GE03011	hypothetical protein	-	-	-
GE01439	8.26	16.54	-1.00175	0.00188787	0.00414395	down	GE01439	3-ketoacyl-CoA thiolase	-	K00632-ko01212 Fatty acid metabolism;ko00071 Fatty acid degradation;ko00592 alpha-Linolenic acid metabolism;ko00280 Valine, leucine and isoleucine degradation;ko00281 Geraniol degradation;ko00362 Benzoate degradation;ko00642 Ethylbenzene degradation	COG0183-Acetyl-CoA acetyltransferase[I]
GE02302	4.7	9.85	-1.06746	0.00190224	0.00417143	down	GE02302	putative ABC transporter ATP-binding protein YfmR	-	-	COG0488-ATPase components of ABC transporters with duplicated ATPase domains[R]
GE00695	5.53	13.13	-1.24752	0.0019206	0.00420965	down	GE00695	Adenosine kinase	GO:0000166,GO:0000287,GO:0001882,GO:0001883,GO:0003674,GO:0003824,GO:0004001,GO:0005488,GO:0005524,GO:0005525,GO:0005575,GO:0005622,GO:0005737,GO:0005886,GO:0005975,GO:0006139,GO:0006163,GO:0006164,GO:0006167,GO:0006725,GO:0006753,GO:0006793,GO:0006796,GO:0006807,GO:0008144,GO:0008150,GO:0008152,GO:0009058,GO:0009117,GO:0009123,GO:0009124,GO:0009126,GO:0009127,GO:0009150,GO:0009152,GO:0009156,GO:…	K00856-ko00230 Purine metabolism	COG0524-Sugar kinases, ribokinase family[G]
GE01603	3.05	7.45	-1.28843	0.00194206	0.00425049	down	GE01603	2-succinylbenzoate--CoA ligase	-	-	COG0318-Acyl-CoA synthetases (AMP-forming)/AMP-acid ligases II[IQ]
GE00936	35.92	73.83	-1.03942	0.00197756	0.004324	down	GE00936	hypothetical protein	-	-	-
GE04202	1.23	7.36	-2.58105	0.00199437	0.00435652	down	GE04202	hypothetical protein	-	-	COG1765-Predicted redox protein, regulator of disulfide bond formation[O]
GE00735	1.04	6.22	-2.58033	0.00199437	0.00435652	down	GE00735	hypothetical protein	-	-	-
GE00510	0.84	4.99	-2.57058	0.00199437	0.00435652	down	GE00510	3-alpha-(or 20-beta)-hydroxysteroid dehydrogenase	-	K00038-ko00140 Steroid hormone biosynthesis	COG1028-Dehydrogenases with different specificities (related to short-chain alcohol dehydrogenases)[IQR]
GE02308	39.09	82.9	-1.08457	0.00202172	0.00441201	down	GE02308	Cold shock protein	-	-	COG1278-Cold shock proteins[K]
GE03126	1.8	5.69	-1.66043	0.00203579	0.00443733	down	GE03126	Aminopeptidase N	-	-	COG0308-Aminopeptidase N[E]
GE04998	11.8	37.27	-1.65923	0.00203579	0.00443733	down	GE04998	hypothetical protein	-	-	-
GE03315	0.22	2.71	-3.62272	0.00205555	0.00447393	down	GE03315	Nitronate monooxygenase	-	K00459-ko00910 Nitrogen metabolism	COG2070-Dioxygenases related to 2-nitropropane dioxygenase[R]
GE04662	0.65	8.05	-3.63048	0.00205555	0.00447393	down	GE04662	Resuscitation-promoting factor RpfE (Precursor)	GO:0005575,GO:0005576,GO:0008150,GO:0009892,GO:0009893,GO:0010468,GO:0010604,GO:0010605,GO:0010628,GO:0010629,GO:0019222,GO:0040008,GO:0040009,GO:0040010,GO:0045927,GO:0048518,GO:0048519,GO:0050789,GO:0060255,GO:0065007	-	-
GE01553	1.97	8.09	-2.03794	0.00212829	0.00461889	down	GE01553	hypothetical protein	-	-	-
GE04220	2.2	9.04	-2.03882	0.00212829	0.00461889	down	GE04220	hypothetical protein	-	-	COG4341-Predicted HD phosphohydrolase[R]
GE01280	0.82	3.36	-2.03477	0.00212829	0.00461889	down	GE01280	hypothetical protein	-	-	-
GE03139	3.62	14.89	-2.04028	0.00212829	0.00461889	down	GE03139	hypothetical protein	-	-	-
GE03227	1.81	9.12	-2.33304	0.00216447	0.00468501	down	GE03227	hypothetical protein	-	-	COG0251-Putative translation initiation inhibitor, yjgF family[J]
GE03818	0.34	1.71	-2.33039	0.00216447	0.00468501	down	GE03818	hypothetical protein	-	-	-
GE00303	2.9	14.64	-2.33579	0.00216447	0.00468501	down	GE00303	putative protein YczJ	-	-	-
GE04234	2.5	12.6	-2.33342	0.00216447	0.00468501	down	GE04234	putative protein R00369	-	-	COG3795-Uncharacterized protein conserved in bacteria[S]
GE03937	1.09	5.49	-2.33248	0.00216447	0.00468501	down	GE03937	3-alpha-(or 20-beta)-hydroxysteroid dehydrogenase	-	K00038-ko00140 Steroid hormone biosynthesis	COG1028-Dehydrogenases with different specificities (related to short-chain alcohol dehydrogenases)[IQR]
GE03775	5.16	10.49	-1.02357	0.00218387	0.00471908	down	GE03775	Arginine transport system permease protein ArtQ	-	-	COG4160-ABC-type arginine/histidine transport system, permease component[E]
GE04343	7.67	15.59	-1.02332	0.00218387	0.00471908	down	GE04343	hypothetical protein	-	-	-
GE03429	6.56	17.17	-1.38812	0.00224335	0.00484297	down	GE03429	hypothetical protein	-	-	-
GE03965	4.65	12.17	-1.38803	0.00224335	0.00484297	down	GE03965	(-)-trans-carveol dehydrogenase	-	-	COG1028-Dehydrogenases with different specificities (related to short-chain alcohol dehydrogenases)[IQR]
GE04500	11.24	24.43	-1.12001	0.00225956	0.00487447	down	GE04500	putative protein aq_2135	-	-	COG0491-Zn-dependent hydrolases, including glyoxylases[R]
GE04134	1.79	5.81	-1.69858	0.00231118	0.00497869	down	GE04134	hypothetical protein	-	-	-
GE03305	2.31	6.78	-1.55339	0.00231413	0.0049803	down	GE03305	hypothetical protein	-	K02067-ko02010 ABC transporters	COG1463-ABC-type transport system involved in resistance to organic solvents, periplasmic component[Q]
GE04038	2.7	7.92	-1.55254	0.00231413	0.0049803	down	GE04038	Alcohol dehydrogenase	-	K13953-ko01220 Degradation of aromatic compounds;ko00010 Glycolysis / Gluconeogenesis;ko00071 Fatty acid degradation;ko00350 Tyrosine metabolism;ko00830 Retinol metabolism;ko00625 Chloroalkane and chloroalkene degradation;ko00626 Naphthalene degradation;ko00980 Metabolism of xenobiotics by cytochrome P450;ko00982 Drug metabolism - cytochrome P450	COG1064-Zn-dependent alcohol dehydrogenases[R]
GE00447	2.99	8.78	-1.55408	0.00231413	0.0049803	down	GE00447	putative oxidoreductase YccK	-	-	COG0667-Predicted oxidoreductases (related to aryl-alcohol dehydrogenases)[C]
GE02102	10.91	22.37	-1.03591	0.00234228	0.00502888	down	GE02102	hypothetical protein	-	-	-
GE02463	0.0001	3.36	-15.0362	0.00237104	0.00508217	down	GE02463	putative succinyl-CoA:3-ketoacid coenzyme A transferase subunit B	-	K01029-ko00650 Butanoate metabolism;ko00072 Synthesis and degradation of ketone bodies;ko00280 Valine, leucine and isoleucine degradation	COG2057-Acyl CoA:acetate/3-ketoacid CoA transferase, beta subunit[I]
GE04846	0.0001	4.59	-15.4862	0.00237104	0.00508217	down	GE04846	Mesaconyl-CoA hydratase	-	-	COG2030-Acyl dehydratase[I]
GE04925	0.0001	5.8	-15.8238	0.00237104	0.00508217	down	GE04925	hypothetical protein	-	-	-
GE00297	0.0001	5.84	-15.8337	0.00237104	0.00508217	down	GE00297	Putative fluoride ion transporter CrcB 2	GO:0003674,GO:0005215,GO:0005575,GO:0005886,GO:0005887,GO:0006810,GO:0006811,GO:0006820,GO:0008150,GO:0008509,GO:0015075,GO:0015103,GO:0015318,GO:0015698,GO:0016020,GO:0016021,GO:0022857,GO:0031224,GO:0031226,GO:0034220,GO:0051179,GO:0051234,GO:0055085,GO:0071944,GO:0098656,GO:0098660,GO:0098661,GO:1903424,GO:1903425	-	-
GE01939	0.0001	1.92	-14.2288	0.00237104	0.00508217	down	GE01939	putative alcohol dehydrogenase adh	-	-	COG1064-Zn-dependent alcohol dehydrogenases[R]
GE03175	0.0001	1.08	-13.3987	0.00237104	0.00508217	down	GE03175	putative monooxygenase y4iD	-	-	COG2072-Predicted flavoprotein involved in K+ transport[P]
GE01365	6.47	14.51	-1.16521	0.00247915	0.00528753	down	GE01365	hypothetical protein	-	-	-
GE01809	7.53	15.59	-1.0499	0.00250659	0.00534099	down	GE01809	NAD(P) transhydrogenase subunit alpha part 1	-	K00324-ko00760 Nicotinate and nicotinamide metabolism	COG3288-NAD/NADP transhydrogenase alpha subunit[C]
trna20	50.19	132.39	-1.39932	0.00264131	0.00561347	down	trna20	tRNA-Trp	-	-	-
GE01707	3.98	10.49	-1.39817	0.00264131	0.00561347	down	GE01707	putative ABC transporter ATP-binding protein YhaQ	-	-	COG1131-ABC-type multidrug transport system, ATPase component[V]
GE03352	2.34	6.98	-1.57672	0.00267444	0.00567989	down	GE03352	hypothetical protein	-	-	-
GE02411	11.38	24.72	-1.11918	0.00268405	0.00569492	down	GE02411	hypothetical protein	-	-	-
GE03977	4.3	10.28	-1.25743	0.00270355	0.0057336	down	GE03977	hypothetical protein	-	-	-
GE04789	4.92	10.07	-1.03333	0.00277499	0.00587408	down	GE04789	hypothetical protein	-	-	-
GE03476	2.75	9.63	-1.8081	0.00290312	0.00612949	down	GE03476	putative PPE family protein PPE24	-	-	-
GE00156	3.38	11.84	-1.80857	0.00290312	0.00612949	down	GE00156	N5-carboxyaminoimidazole ribonucleotide mutase	GO:0008150,GO:0040007	K01588-ko00230 Purine metabolism	COG0041-Phosphoribosylcarboxyaminoimidazole (NCAIR) mutase[F]
GE01135	0.28	2.06	-2.87915	0.00296384	0.00623435	down	GE01135	hypothetical protein	-	-	COG5361-Uncharacterized conserved protein[S]
GE05010	1.38	10.07	-2.86732	0.00296384	0.00623435	down	GE05010	hypothetical protein	-	-	-
GE01663	11.14	23.01	-1.04651	0.00297197	0.00624418	down	GE01663	putative S-adenosylmethionine-dependent methyltransferase MSMEG_2350/MSMEI_2290	-	-	COG2226-Methylase involved in ubiquinone/menaquinone biosynthesis[H]
GE03992	4.7	14.38	-1.61333	0.0030787	0.0064624	down	GE03992	hypothetical protein	-	-	-
GE01277	3.09	7.23	-1.22639	0.00314851	0.00659974	down	GE01277	hypothetical protein	-	-	-
GE03522	1.51	5.56	-1.88054	0.00319359	0.00668801	down	GE03522	Diacylglycerol acyltransferase/mycolyltransferase Ag85C (Precursor)	-	K18851-ko00561 Glycerolipid metabolism	COG0627-Predicted esterase[R]
GE03408	15.21	38.85	-1.35289	0.0032011	0.00670064	down	GE03408	hypothetical protein	-	-	-
GE03791	4.63	13.16	-1.50708	0.00342506	0.00715615	down	GE03791	HTH-type transcriptional regulator LuxR	-	-	-
GE04308	0.61	3.42	-2.48712	0.00347811	0.00725859	down	GE04308	Protease HtpX	-	-	-
GE03763	1.28	7.15	-2.4818	0.00347811	0.00725859	down	GE03763	Organic hydroperoxide resistance transcriptional regulator	-	-	COG1846-Transcriptional regulators[K]
GE00039	1.49	8.33	-2.483	0.00347811	0.00725859	down	GE00039	Putative esterase PA1618	-	K19222-ko00130 Ubiquinone and other terpenoid-quinone biosynthesis	COG2050-Uncharacterized protein, possibly involved in aromatic compounds catabolism[Q]
GE01921	0.89	5.01	-2.49293	0.00347811	0.00725859	down	GE01921	putative protein Rv1815 (Precursor)	-	-	-
GE02420	1.75	7.46	-2.09182	0.00362553	0.00754879	down	GE02420	hypothetical protein	-	-	-
GE01743	0.98	4.16	-2.08573	0.00362553	0.00754879	down	GE01743	Threonine synthase	-	K01733-ko01230 Biosynthesis of amino acids;ko00260 Glycine, serine and threonine metabolism;ko00750 Vitamin B6 metabolism	COG0498-Threonine synthase[E]
GE03023	3.21	8.63	-1.42679	0.00365387	0.00760253	down	GE03023	UPF0336 protein SAV_4901	-	-	COG1545-Predicted nucleic-acid-binding protein containing a Zn-ribbon[R]
GE03613	0.63	3	-2.25154	0.00366408	0.00760976	down	GE03613	Shikimate transporter	-	-	-
GE04995	2.93	13.97	-2.25336	0.00366408	0.00760976	down	GE04995	hypothetical protein	-	-	-
GE01296	0.94	4.49	-2.25598	0.00366408	0.00760976	down	GE01296	Putative tyrosine-protein phosphatase H16_A0669 (Precursor)	-	-	COG2365-Protein tyrosine/serine phosphatase[T]
GE03098	1.5	7.13	-2.24894	0.00366408	0.00760976	down	GE03098	tRNA(Ile)-lysidine synthase	GO:0008150,GO:0040007	-	-
GE00022	1.44	6.88	-2.25634	0.00366408	0.00760976	down	GE00022	putative HTH-type transcriptional regulator y4dJ	-	-	-
GE00578	8.55	17.81	-1.05869	0.00376836	0.00780836	down	GE00578	Sulfate transport system permease protein CysT	-	K02046-ko00920 Sulfur metabolism;ko02010 ABC transporters	COG0555-ABC-type sulfate transport system, permease component[O]
GE03690	13.73	29.75	-1.11556	0.00379223	0.00784701	down	GE03690	putative protein Rv0010c	-	-	-
GE02803	4.15	10.28	-1.30866	0.00382894	0.00791028	down	GE02803	hypothetical protein	-	-	-
GE03431	10.11	25.06	-1.3096	0.00382894	0.00791028	down	GE03431	NaeI very short patch repair endonuclease	-	-	COG3727-DNA G:T-mismatch repair endonuclease[L]
GE03888	0.18	2.01	-3.48113	0.00387413	0.007989	down	GE03888	putative protein YxaH	-	-	COG2311-Predicted membrane protein[S]
GE03306	0.21	2.32	-3.46566	0.00387413	0.007989	down	GE03306	hypothetical protein	-	K02067-ko02010 ABC transporters	COG1463-ABC-type transport system involved in resistance to organic solvents, periplasmic component[Q]
GE01576	0.44	4.88	-3.47131	0.00387413	0.007989	down	GE01576	hypothetical protein	-	-	-
GE04218	0.38	4.28	-3.49354	0.00387413	0.007989	down	GE04218	hypothetical protein	-	-	COG4341-Predicted HD phosphohydrolase[R]
GE03801	2.62	7.59	-1.53453	0.00398487	0.00820051	down	GE03801	putative protein Rv0048c (Precursor)	GO:0005575,GO:0005618,GO:0005886,GO:0005887,GO:0016020,GO:0016021,GO:0030312,GO:0031224,GO:0031226,GO:0071944	-	-
GE02099	4.94	15.98	-1.69368	0.00401292	0.00825447	down	GE02099	Putative 8-oxo-dGTP diphosphatase 2	-	-	COG1051-ADP-ribose pyrophosphatase[F]
GE01450	14.73	31.01	-1.07398	0.00401643	0.00825793	down	GE01450	putative HTH-type transcriptional regulator YpoP	-	-	COG1846-Transcriptional regulators[K]
GE00638	13	26.71	-1.03887	0.00418204	0.00858279	down	GE00638	putative protein Mb2628	-	-	-
GE03129	3.67	9.99	-1.4447	0.00429134	0.00879111	down	GE03129	putative ABC transporter ATP-binding protein YlmA	-	K02013-ko02010 ABC transporters	COG1119-ABC-type molybdenum transport system, ATPase component/photorepair protein PhrA[P]
GE01462	5.06	13.13	-1.37566	0.00446795	0.00913219	down	GE01462	hypothetical protein	-	-	-
GE01146	2.7	9.08	-1.74973	0.00452778	0.00923148	down	GE01146	hypothetical protein	-	-	-
GE01960	1.99	6.71	-1.75354	0.00452778	0.00923148	down	GE01960	hypothetical protein	-	-	COG2159-Predicted metal-dependent hydrolase of the TIM-barrel fold[R]
rrna1	0.0001	1.27	-13.6325	0.00452887	0.00922537	down	rrna1	16S ribosomal RNA	-	-	-
GE03988	0.0001	18.95	-17.5318	0.00452887	0.00922537	down	GE03988	hypothetical protein	-	-	-
GE00004	2.9	7.22	-1.31595	0.00453879	0.00923723	down	GE00004	Phosphoglucosamine mutase	GO:0008150,GO:0040007	K03431-ko00520 Amino sugar and nucleotide sugar metabolism	COG1109-Phosphomannomutase[G]
GE04259	4.02	10	-1.31473	0.00453879	0.00923723	down	GE04259	Formimidoylglutamase	-	K01479-ko00340 Histidine metabolism	COG0010-Arginase/agmatinase/formimionoglutamate hydrolase, arginase family[E]
GE04093	7.39	16.57	-1.16493	0.00496263	0.0100522	down	GE04093	putative HTH-type transcriptional regulator in mcrB 3'region	-	-	-
GE03838	1.48	5.21	-1.81569	0.00505006	0.0102156	down	GE03838	putative protein y4oD	-	-	-
GE01758	1.29	4.55	-1.8185	0.00505006	0.0102156	down	GE01758	hypothetical protein	-	-	-
GE01242	1.74	6.11	-1.81209	0.00505006	0.0102156	down	GE01242	hypothetical protein	-	-	-
GE02591	22.38	44.89	-1.00418	0.00509006	0.0102872	down	GE02591	Anti-sigma-F factor antagonist RsfB	-	-	COG1366-Anti-anti-sigma regulatory factor (antagonist of anti-sigma factor)[T]
GE00899	7.64	19.99	-1.38763	0.00527567	0.0106433	down	GE00899	hypothetical protein	-	-	-
GE03378	5.8	15.15	-1.38519	0.00527567	0.0106433	down	GE03378	hypothetical protein	-	-	-
GE01737	3.62	9.46	-1.38585	0.00527567	0.0106433	down	GE01737	Release factor glutamine methyltransferase	GO:0003674,GO:0003824,GO:0005575,GO:0005622,GO:0005737,GO:0005829,GO:0008150,GO:0008152,GO:0008168,GO:0008757,GO:0016740,GO:0016741,GO:0032259,GO:0040007	-	COG2890-Methylase of polypeptide chain release factors[J]
GE02876	0.41	2.76	-2.75097	0.00533928	0.0107452	down	GE02876	Alcohol dehydrogenase	-	K18382-ko00640 Propanoate metabolism	COG1064-Zn-dependent alcohol dehydrogenases[R]
GE04897	0.78	5.23	-2.74526	0.00533928	0.0107452	down	GE04897	FMN-dependent NADPH-azoreductase	-	-	-
GE03310	0.37	2.45	-2.72718	0.00533928	0.0107452	down	GE03310	hypothetical protein	-	-	-
GE00709	0.41	2.72	-2.72991	0.00533928	0.0107452	down	GE00709	putative endopeptidase Mb2213c	GO:0005575,GO:0005576	-	COG0791-Cell wall-associated hydrolases (invasion-associated proteins)[M]
GE00857	1.24	8.33	-2.74798	0.00533928	0.0107452	down	GE00857	Phosphoribosyl-AMP cyclohydrolase	GO:0008150,GO:0040007	K01496-ko01230 Biosynthesis of amino acids;ko00340 Histidine metabolism	COG0139-Phosphoribosyl-AMP cyclohydrolase[E]
GE00465	0.39	2.59	-2.73141	0.00533928	0.0107452	down	GE00465	NDMA-dependent alcohol dehydrogenase	-	-	COG1062-Zn-dependent alcohol dehydrogenases, class III[C]
GE03900	4.06	12.29	-1.59793	0.00533969	0.0107245	down	GE03900	Thermoresistant gluconokinase	-	K00851-ko01200 Carbon metabolism;ko00030 Pentose phosphate pathway	COG3265-Gluconate kinase[G]
GE04275	1.35	4.07	-1.59207	0.00533969	0.0107245	down	GE04275	Glutathione-binding protein GsiB (Precursor)	-	K02035-ko02024 Quorum sensing	COG0747-ABC-type dipeptide transport system, periplasmic component[E]
GE04724	4.03	12.21	-1.59921	0.00533969	0.0107245	down	GE04724	hypothetical protein	-	-	-
GE00458	2.75	10.26	-1.89953	0.00554296	0.0111155	down	GE00458	Putative peroxiredoxin Rv2521	GO:0005575,GO:0005622,GO:0005737,GO:0005829,GO:0005886,GO:0016020,GO:0071944	-	COG1225-Peroxiredoxin[O]
GE01228	2.45	9.15	-1.90099	0.00554296	0.0111155	down	GE01228	Mini-circle uncharacterized 19.1 kDa protein	-	-	-
GE01987	5.06	10.62	-1.06957	0.00567513	0.0113528	down	GE01987	NAD-reducing hydrogenase HoxS subunit beta	-	-	COG3259-Coenzyme F420-reducing hydrogenase, alpha subunit[C]
GE02962	2.43	6.8	-1.48458	0.00589358	0.0117611	down	GE02962	Nitronate monooxygenase	GO:0000166,GO:0001775,GO:0002252,GO:0002263,GO:0002274,GO:0002275,GO:0002283,GO:0002366,GO:0002376,GO:0002443,GO:0002444,GO:0002446,GO:0003674,GO:0003824,GO:0003938,GO:0005488,GO:0005575,GO:0005576,GO:0005622,GO:0005634,GO:0005737,GO:0005829,GO:0006139,GO:0006163,GO:0006164,GO:0006183,GO:0006725,GO:0006753,GO:0006793,GO:0006796,GO:0006807,GO:0006810,GO:0006887,GO:0006955,GO:0007623,GO:0008150,GO:…	-	COG2070-Dioxygenases related to 2-nitropropane dioxygenase[R]
GE03732	6.34	17.77	-1.48689	0.00589358	0.0117611	down	GE03732	hypothetical protein	-	-	COG3585-Molybdopterin-binding protein[H]
GE03036	1.96	7.92	-2.01465	0.00594488	0.011853	down	GE03036	HTH-type transcriptional regulator SinR	-	-	COG0662-Mannose-6-phosphate isomerase[G]
GE01151	1.43	5.78	-2.01505	0.00594488	0.011853	down	GE01151	hypothetical protein	-	-	-
GE04718	1.89	9.89	-2.38758	0.00602656	0.011992	down	GE04718	hypothetical protein	-	K01507-ko00190 Oxidative phosphorylation	-
GE01409	6.14	13.07	-1.08995	0.00603658	0.0120067	down	GE01409	putative 45.4 kDa protein in thiaminase I 5'region	-	-	COG1051-ADP-ribose pyrophosphatase[F]
GE02342	2.07	9.27	-2.16294	0.00615682	0.0122135	down	GE02342	Nucleoid-associated protein EspR	GO:0002791,GO:0003674,GO:0003676,GO:0003677,GO:0005488,GO:0005515,GO:0005575,GO:0005576,GO:0005618,GO:0005622,GO:0005737,GO:0005829,GO:0005886,GO:0006355,GO:0008150,GO:0009605,GO:0009607,GO:0009889,GO:0010468,GO:0010556,GO:0016020,GO:0019219,GO:0019222,GO:0030312,GO:0031323,GO:0031326,GO:0032879,GO:0032880,GO:0032991,GO:0032993,GO:0042802,GO:0043207,GO:0043565,GO:0044403,GO:0044419,GO:0050708,GO:…	-	-
GE00793	2.38	10.65	-2.16182	0.00615682	0.0122135	down	GE00793	hypothetical protein	-	-	-
GE01316	1.1	4.95	-2.16993	0.00615682	0.0122135	down	GE01316	putative deacetylase YojG	-	-	COG2120-Uncharacterized proteins, LmbE homologs[S]
GE04438	1.03	4.64	-2.17148	0.00615682	0.0122135	down	GE04438	Putative short-chain type dehydrogenase/reductase MSMEG_6031/MSMEI_5872	-	-	COG1028-Dehydrogenases with different specificities (related to short-chain alcohol dehydrogenases)[IQR]
GE04468	0.75	3.35	-2.1592	0.00615682	0.0122135	down	GE04468	hypothetical protein	-	-	-
GE03618	0.55	2.48	-2.17284	0.00615682	0.0122135	down	GE03618	Para-nitrobenzyl esterase	-	-	COG2272-Carboxylesterase type B[I]
GE00858	0.71	3.2	-2.17218	0.00615682	0.0122135	down	GE00858	Transcription regulatory protein OpdE	-	-	-
GE01752	15.22	33.44	-1.13561	0.00673303	0.0132981	down	GE01752	HTH-type transcriptional regulator Rv2034	-	-	COG1777-Predicted transcriptional regulators[K]
GE01265	2.75	7.83	-1.50958	0.00688552	0.0135933	down	GE01265	3-oxoacyl-[acyl-carrier-protein] reductase FabG	-	-	COG1028-Dehydrogenases with different specificities (related to short-chain alcohol dehydrogenases)[IQR]
GE00261	21.36	43.53	-1.0271	0.00699965	0.0137885	down	GE00261	putative transcriptional regulator WhiB7	GO:0001101,GO:0008150,GO:0010033,GO:0033993,GO:0042221,GO:0046677,GO:0050896,GO:0070542,GO:1901700	-	-
GE04323	1.43	4.61	-1.68875	0.00700453	0.0137861	down	GE04323	UPF0118 membrane protein Rv0205	GO:0003674,GO:0005215,GO:0005575,GO:0005886,GO:0005887,GO:0006810,GO:0008150,GO:0016020,GO:0016021,GO:0031224,GO:0031226,GO:0040007,GO:0051179,GO:0051234,GO:0055085,GO:0071944	-	COG0628-Predicted permease[R]
GE03107	3.94	12.69	-1.68742	0.00700453	0.0137861	down	GE03107	putative protein YdfG	-	-	COG2128-Uncharacterized conserved protein[S]
GE02864	1.67	5.37	-1.68507	0.00700453	0.0137861	down	GE02864	putative ABC transporter substrate-binding lipoprotein YvrC (Precursor)	-	K02016-ko02010 ABC transporters	COG0614-ABC-type Fe3+-hydroxamate transport system, periplasmic component[P]
GE02815	0.71	7.11	-3.32396	0.00730603	0.0143264	down	GE02815	putative protein MT0836	GO:0005575,GO:0005618,GO:0005886,GO:0016020,GO:0030312,GO:0071944	-	-
GE02506	0.39	3.94	-3.33665	0.00730603	0.0143264	down	GE02506	hypothetical protein	-	-	-
GE00905	0.41	4.12	-3.32895	0.00730603	0.0143264	down	GE00905	putative protein Mb2604	-	-	-
GE04900	0.16	1.56	-3.2854	0.00730603	0.0143264	down	GE04900	Thermophilic serine proteinase (Precursor)	GO:0005575,GO:0005576	-	COG1404-Subtilisin-like serine proteases[O]
GE00113	5.76	13.22	-1.19858	0.00730972	0.014318	down	GE00113	Purine nucleoside phosphorylase	GO:0003674,GO:0003824,GO:0004731,GO:0006139,GO:0006152,GO:0006161,GO:0006725,GO:0006807,GO:0008150,GO:0008152,GO:0009056,GO:0009116,GO:0009120,GO:0009164,GO:0009987,GO:0016740,GO:0016757,GO:0016763,GO:0019439,GO:0034641,GO:0034655,GO:0034656,GO:0042278,GO:0042453,GO:0044237,GO:0044238,GO:0044248,GO:0044270,GO:0044281,GO:0044282,GO:0046121,GO:0046122,GO:0046124,GO:0046483,GO:0046700,GO:0055086,GO:…	K03783-ko00230 Purine metabolism;ko00240 Pyrimidine metabolism;ko00760 Nicotinate and nicotinamide metabolism	COG0005-Purine nucleoside phosphorylase[F]
GE03643	8.69	20.52	-1.2396	0.00750541	0.0146663	down	GE03643	Putative 4-hydroxy-4-methyl-2-oxoglutarate aldolase	-	-	COG0684-Demethylmenaquinone methyltransferase[H]
GE01258	7.34	17.32	-1.23859	0.00750541	0.0146663	down	GE01258	hypothetical protein	-	-	-
GE00721	2.8	6.83	-1.28646	0.00760221	0.014833	down	GE00721	Polyprenol-phosphate-mannose-dependent alpha-(1-2)-phosphatidylinositol mannoside mannosyltransferase	GO:0000026,GO:0000030,GO:0003674,GO:0003824,GO:0006629,GO:0006643,GO:0006664,GO:0008150,GO:0008152,GO:0008610,GO:0009058,GO:0009247,GO:0009987,GO:0016740,GO:0016757,GO:0016758,GO:0044237,GO:0044238,GO:0044249,GO:0044255,GO:0046467,GO:0070085,GO:0071704,GO:0097502,GO:1901135,GO:1901137,GO:1901576,GO:1903509	-	-
GE02635	3.45	7.45	-1.11064	0.00761664	0.0148483	down	GE02635	3-oxo-5-alpha-steroid 4-dehydrogenase	-	K16051-ko00984 Steroid degradation	-
GE00086	14.46	29.07	-1.00746	0.00772235	0.0150479	down	GE00086	Aminoglycoside N(6')-acetyltransferase type 1	-	-	COG1247-Sortase and related acyltransferases[M]
GE04439	1.83	6.15	-1.74874	0.00791931	0.0154084	down	GE04439	1-deoxy-11-beta-hydroxypentalenate dehydrogenase	-	-	COG4221-Short-chain alcohol dehydrogenase of unknown specificity[R]
GE03108	4.26	14.33	-1.75011	0.00791931	0.0154084	down	GE03108	hypothetical protein	-	-	-
GE02209	1.61	4.71	-1.54867	0.00802093	0.0155961	down	GE02209	putative monooxygenase Mb0916	-	-	COG2072-Predicted flavoprotein involved in K+ transport[P]
GE03024	4.13	9.25	-1.16331	0.00840148	0.0162659	down	GE03024	Acyl-CoA dehydrogenase fadE12	GO:0000166,GO:0003674,GO:0005488,GO:0006066,GO:0006082,GO:0006629,GO:0006631,GO:0006635,GO:0006706,GO:0006707,GO:0008150,GO:0008152,GO:0008202,GO:0008203,GO:0009056,GO:0009062,GO:0009987,GO:0016042,GO:0016054,GO:0016125,GO:0016127,GO:0019395,GO:0019752,GO:0030258,GO:0032787,GO:0033539,GO:0034440,GO:0036094,GO:0040007,GO:0043167,GO:0043168,GO:0043436,GO:0044110,GO:0044117,GO:0044237,GO:0044238,GO:…	-	COG1960-Acyl-CoA dehydrogenases[I]
GE00064	4.49	12.17	-1.43854	0.00864901	0.0167236	down	GE00064	hypothetical protein	-	-	COG4430-Uncharacterized protein conserved in bacteria[S]
GE04372	0.0001	9.72	-16.5687	0.00873277	0.0168387	down	GE04372	hypothetical protein	-	-	-
GE00795	0.0001	1.3	-13.6662	0.00873277	0.0168387	down	GE00795	putative protein Rv1945	-	-	-
GE02316	0.0001	1.5	-13.8727	0.00873277	0.0168387	down	GE02316	Resuscitation-promoting factor RpfB (Precursor)	GO:0005575,GO:0005576,GO:0008150,GO:0009892,GO:0009893,GO:0010468,GO:0010604,GO:0010605,GO:0010628,GO:0010629,GO:0019222,GO:0022611,GO:0032502,GO:0040008,GO:0040009,GO:0040010,GO:0044111,GO:0044114,GO:0044115,GO:0044403,GO:0044419,GO:0045927,GO:0048518,GO:0048519,GO:0050789,GO:0051704,GO:0060255,GO:0065007,GO:0085016	-	COG3583-Uncharacterized protein conserved in bacteria[S]
GE00338	0.0001	3.42	-15.0617	0.00873277	0.0168387	down	GE00338	hypothetical protein	-	-	-
GE04430	0.0001	1.94	-14.2438	0.00873277	0.0168387	down	GE04430	putative protein Mb0965c	-	-	COG2141-Coenzyme F420-dependent N5,N10-methylene tetrahydromethanopterin reductase and related flavin-dependent oxidoreductases[C]
GE01297	0.0001	1.85	-14.1752	0.00873277	0.0168387	down	GE01297	Putative tyrosine-protein phosphatase H16_A0669 (Precursor)	-	-	COG2365-Protein tyrosine/serine phosphatase[T]
GE00019	0.0001	1.2	-13.5507	0.00873277	0.0168387	down	GE00019	hypothetical protein	-	-	-
GE04467	0.0001	1.82	-14.1517	0.00873277	0.0168387	down	GE04467	hypothetical protein	-	-	COG3687-Predicted metal-dependent hydrolase[R]
GE02370	0.0001	3.84	-15.2288	0.00873277	0.0168387	down	GE02370	Putative heat shock protein HspR	-	-	COG0789-Predicted transcriptional regulators[K]
GE00289	0.0001	1.87	-14.1908	0.00873277	0.0168387	down	GE00289	Cell division protein FtsX	GO:0005575,GO:0005576,GO:0005618,GO:0005886,GO:0005887,GO:0008150,GO:0009987,GO:0016020,GO:0016021,GO:0030312,GO:0031224,GO:0031226,GO:0040007,GO:0051301,GO:0071944	K09811-ko02010 ABC transporters	COG2177-Cell division protein[D]
GE03176	0.0001	1.61	-13.9748	0.00873277	0.0168387	down	GE03176	hypothetical protein	-	-	-
GE02647	0.0001	3.46	-15.0785	0.00873277	0.0168387	down	GE02647	hypothetical protein	-	-	-
GE01072	0.52	1.85	-1.83094	0.00883473	0.0169773	down	GE01072	HTH-type transcriptional regulator MalT	-	-	COG2909-ATP-dependent transcriptional regulator[K]
GE00262	2.02	7.15	-1.82359	0.00883473	0.0169773	down	GE00262	hypothetical protein	-	-	-
GE04233	4.21	9.97	-1.24377	0.00894383	0.017165	down	GE04233	AB hydrolase superfamily protein YfhM	-	-	COG0596-Predicted hydrolases or acyltransferases (alpha/beta hydrolase superfamily) [R]
GE02157	8.13	19.25	-1.24353	0.00894383	0.017165	down	GE02157	hypothetical protein	-	-	COG3865-Uncharacterized protein conserved in bacteria[S]
GE04269	1.8	4.61	-1.35677	0.00896549	0.0171919	down	GE04269	Urocanate hydratase	-	K01712-ko00340 Histidine metabolism	COG2987-Urocanate hydratase[E]
GE03417	1.69	4.33	-1.35734	0.00896549	0.0171919	down	GE03417	putative oxidoreductase CzcO-like	-	-	COG2072-Predicted flavoprotein involved in K+ transport[P]
trna50	40.57	99.49	-1.29414	0.0090432	0.0173299	down	trna50	tRNA-Leu	-	-	-
GE04346	1.23	2.64	-1.10188	0.00908092	0.0173874	down	GE04346	hypothetical protein	GO:0005575,GO:0005886,GO:0008150,GO:0016020,GO:0040007,GO:0071944	-	-
GE02469	1.19	7.32	-2.62088	0.00956903	0.0182678	down	GE02469	3-ketosteroid-9-alpha-monooxygenase oxygenase subunit	-	K15982-ko00984 Steroid degradation	COG4638-Phenylpropionate dioxygenase and related ring-hydroxylating dioxygenases, large terminal subunit[PR]
GE01438	0.35	2.14	-2.61218	0.00956903	0.0182678	down	GE01438	Ribonuclease D	-	-	COG0349-Ribonuclease D[J]
GE01376	0.28	1.73	-2.62727	0.00956903	0.0182678	down	GE01376	Copper resistance protein A (Precursor)	-	-	COG2132-Putative multicopper oxidases[Q]
GE03203	0.8	3.06	-1.93546	0.00966513	0.0184201	down	GE03203	Shikimate transporter	-	-	-
GE03020	1.12	4.26	-1.92735	0.00966513	0.0184201	down	GE03020	Carboxylesterase NlhH	-	-	COG0657-Esterase/lipase[I]
GE00331	1.73	6.58	-1.92732	0.00966513	0.0184201	down	GE00331	putative HTH-type transcriptional regulator YvkB	-	-	-
GE01864	3.62	7.33	-1.01782	0.00988759	0.0188202	down	GE01864	RecBCD enzyme subunit RecD	GO:0005575,GO:0005618,GO:0005622,GO:0005737,GO:0005829,GO:0005886,GO:0016020,GO:0030312,GO:0071944	K03581-ko03440 Homologous recombination	COG0507-ATP-dependent exoDNAse (exonuclease V), alpha subunit - helicase superfamily I member[L]
GE02973	5.59	12.53	-1.16447	0.0100269	0.0190533	down	GE02973	putative oxidoreductase Mb1385	GO:0003674,GO:0003824,GO:0004303,GO:0005488,GO:0005515,GO:0005575,GO:0005622,GO:0005737,GO:0005777,GO:0006066,GO:0006629,GO:0007568,GO:0008150,GO:0008152,GO:0008202,GO:0008203,GO:0009719,GO:0009725,GO:0009987,GO:0010033,GO:0014070,GO:0016125,GO:0016229,GO:0016491,GO:0016614,GO:0016616,GO:0016829,GO:0016835,GO:0016836,GO:0018812,GO:0030283,GO:0032502,GO:0033764,GO:0033993,GO:0042221,GO:0042493,GO:…	K00059-ko01212 Fatty acid metabolism;ko00061 Fatty acid biosynthesis;ko01040 Biosynthesis of unsaturated fatty acids;ko00780 Biotin metabolism	COG1028-Dehydrogenases with different specificities (related to short-chain alcohol dehydrogenases)[IQR]
GE02078	1.36	5.72	-2.07241	0.0102602	0.0194516	down	GE02078	hypothetical protein	-	-	-
GE01149	1.37	5.78	-2.07689	0.0102602	0.0194516	down	GE01149	Precorrin-8X methylmutase	-	K06042-ko00860 Porphyrin and chlorophyll metabolism	COG2082-Precorrin isomerase[H]
GE03931	0.77	3.73	-2.27625	0.0103654	0.0196344	down	GE03931	hypothetical protein	-	-	-
GE00831	1.07	5.21	-2.28367	0.0103654	0.0196344	down	GE00831	putative NAD(P)H oxidoreductase HI_1544	-	-	COG2249-Putative NADPH-quinone reductase (modulator of drug activity B)[R]
GE04007	2.61	6.02	-1.20571	0.0104026	0.0196924	down	GE04007	DNA polymerase I	-	K02335-ko00230 Purine metabolism;ko00240 Pyrimidine metabolism;ko03030 DNA replication;ko03410 Base excision repair;ko03420 Nucleotide excision repair;ko03440 Homologous recombination	COG0749-DNA polymerase I - 3'-5' exonuclease and polymerase domains[L]
GE03054	3.04	7.87	-1.37229	0.0106259	0.0200984	down	GE03054	A/G-specific adenine glycosylase	GO:0003674,GO:0003824,GO:0005575,GO:0005886,GO:0006139,GO:0006259,GO:0006281,GO:0006284,GO:0006725,GO:0006807,GO:0006950,GO:0006974,GO:0008150,GO:0008152,GO:0009987,GO:0016020,GO:0016787,GO:0033554,GO:0034641,GO:0043170,GO:0044237,GO:0044238,GO:0044260,GO:0046483,GO:0050896,GO:0051716,GO:0071704,GO:0071944,GO:0090304,GO:1901360	K03575-ko03410 Base excision repair	COG1194-A/G-specific DNA glycosylase[L]
GE03982	2.12	6.54	-1.62523	0.0107424	0.020306	down	GE03982	putative NAD-dependent oxidoreductase MAP_4146	-	-	COG1028-Dehydrogenases with different specificities (related to short-chain alcohol dehydrogenases)[IQR]
GE01323	1.73	5.33	-1.62336	0.0107424	0.020306	down	GE01323	Extracellular esterase EstB (Precursor)	-	-	COG1075-Predicted acetyltransferases and hydrolases with the alpha/beta hydrolase fold[R]
GE04598	3.22	6.91	-1.10163	0.0108342	0.0204623	down	GE04598	Puromycin resistance protein pur8	-	-	-
GE02636	4.28	9.19	-1.10245	0.0108342	0.0204623	down	GE02636	Flavin-dependent monooxygenase, oxygenase subunit HsaA	-	K16047-ko00984 Steroid degradation	COG1960-Acyl-CoA dehydrogenases[I]
GE03688	1.97	6.32	-1.68173	0.0123075	0.0231288	down	GE03688	UPF0749 protein YlxW (Precursor)	-	-	COG3879-Uncharacterized protein conserved in bacteria[S]
GE01061	1.74	5.57	-1.67859	0.0123075	0.0231288	down	GE01061	UPF0749 protein Mb1854 (Precursor)	GO:0005575,GO:0005886,GO:0005887,GO:0016020,GO:0016021,GO:0031224,GO:0031226,GO:0071944	-	COG3879-Uncharacterized protein conserved in bacteria[S]
GE01857	2.58	8.26	-1.67877	0.0123075	0.0231288	down	GE01857	hypothetical protein	-	-	-
GE01934	2.48	7.94	-1.6788	0.0123075	0.0231288	down	GE01934	hypothetical protein	-	-	-
GE01044	3.24	7.47	-1.20511	0.0124236	0.0233227	down	GE01044	hypothetical protein	-	-	COG4825-Uncharacterized membrane-anchored protein conserved in bacteria[S]
GE02838	2.29	6	-1.38961	0.0125893	0.0235993	down	GE02838	hypothetical protein	-	-	COG3804-Uncharacterized conserved protein related to dihydrodipicolinate reductase[S]
GE03568	2.17	5.68	-1.3882	0.0125893	0.0235993	down	GE03568	hypothetical protein	-	-	-
GE01422	4.37	10.41	-1.25226	0.0127245	0.0238181	down	GE01422	2,5-diamino-6-ribosylamino-4(3H)-pyrimidinone 5'-phosphate reductase	-	-	COG1985-Pyrimidine reductase, riboflavin biosynthesis[H]
GE03601	2.21	5.27	-1.25376	0.0127245	0.0238181	down	GE03601	hypothetical protein	-	-	COG2251-Predicted nuclease (RecB family)[R]
GE03404	7.51	17.9	-1.25307	0.0127245	0.0238181	down	GE03404	putative HTH-type transcriptional regulator Mb0904	-	-	COG1846-Transcriptional regulators[K]
GE03267	6.45	16	-1.3107	0.0128099	0.0239582	down	GE03267	hypothetical protein	-	-	-
GE04728	16.36	35.08	-1.10048	0.0129356	0.0241833	down	GE04728	hypothetical protein	-	-	-
GE04057	0.23	2.05	-3.15592	0.0137789	0.0256218	down	GE04057	putative HTH-type transcriptional regulator YbhD	-	-	COG0583-Transcriptional regulator[K]
GE03268	0.59	5.28	-3.16175	0.0137789	0.0256218	down	GE03268	RutC family protein YjgH	-	-	COG0251-Putative translation initiation inhibitor, yjgF family[J]
GE02154	0.36	3.22	-3.16099	0.0137789	0.0256218	down	GE02154	Thiol-disulfide oxidoreductase ResA	-	-	COG0526-Thiol-disulfide isomerase and thioredoxins[OC]
GE04538	0.54	4.81	-3.15501	0.0137789	0.0256218	down	GE04538	hypothetical protein	-	-	-
GE03577	0.22	2	-3.18442	0.0137789	0.0256218	down	GE03577	Ribonucleoside-diphosphate reductase subunit beta nrdF1	-	K00526-ko00230 Purine metabolism;ko00240 Pyrimidine metabolism	COG0208-Ribonucleotide reductase, beta subunit[F]
GE04391	0.17	1.53	-3.16993	0.0137789	0.0256218	down	GE04391	hypothetical protein	-	-	-
GE02294	0.26	2.33	-3.16375	0.0137789	0.0256218	down	GE02294	putative oxidoreductase MSMEG_2408/MSMEI_2347	-	-	COG0656-Aldo/keto reductases, related to diketogulonate reductase[R]
GE01370	1.12	3.78	-1.75489	0.0139517	0.0258791	down	GE01370	Beta-ketoadipyl-CoA thiolase	-	K00626-ko01200 Carbon metabolism;ko01212 Fatty acid metabolism;ko00620 Pyruvate metabolism;ko00630 Glyoxylate and dicarboxylate metabolism;ko00640 Propanoate metabolism;ko00650 Butanoate metabolism;ko00720 Carbon fixation pathways in prokaryotes;ko00071 Fatty acid degradation;ko00072 Synthesis and degradation of ketone bodies;ko00280 Valine, leucine and isoleucine degradation;ko00310 Lysine degra…	COG0183-Acetyl-CoA acetyltransferase[I]
GE00902	1.11	3.73	-1.74862	0.0139517	0.0258791	down	GE00902	Tetracycline resistance protein from transposon Tn4351/Tn4400	-	-	COG0654-2-polyprenyl-6-methoxyphenol hydroxylase and related FAD-dependent oxidoreductases[HC]
GE00639	2.57	8.63	-1.74759	0.0139517	0.0258791	down	GE00639	putative protein Mb2629	-	-	-
GE00507	1.12	3.22	-1.52356	0.01399	0.0259237	down	GE00507	3-(3-hydroxy-phenyl)propionate/3-hydroxycinnamic acid hydroxylase	-	K05712-ko01220 Degradation of aromatic compounds;ko00360 Phenylalanine metabolism	COG0654-2-polyprenyl-6-methoxyphenol hydroxylase and related FAD-dependent oxidoreductases[HC]
GE01360	1.19	3.4	-1.51457	0.01399	0.0259237	down	GE01360	Glutathione import ATP-binding protein GsiA	-	K02031-ko02024 Quorum sensing	COG1123-ATPase components of various ABC-type transport systems, contain duplicated ATPase[R]
GE02447	10.58	23.73	-1.16537	0.0143168	0.0265019	down	GE02447	hypothetical protein	-	-	-
GE01601	9.63	20.24	-1.0716	0.0145304	0.0268642	down	GE01601	HTH-type transcriptional regulator RutR	-	-	COG1309-Transcriptional regulator[K]
GE01087	7.31	16.88	-1.20737	0.0148497	0.0274098	down	GE01087	Guanine deaminase	-	-	COG0590-Cytosine/adenosine deaminases[FJ]
GE04257	3.31	8.76	-1.4041	0.0149064	0.0274919	down	GE04257	hypothetical protein	-	K16163-ko00350 Tyrosine metabolism	-
GE04807	2.37	6.29	-1.40817	0.0149064	0.0274919	down	GE04807	hypothetical protein	-	-	COG1302-Uncharacterized protein conserved in bacteria[S]
GE00843	5.94	15.74	-1.4059	0.0149064	0.0274919	down	GE00843	hypothetical protein	-	-	COG5478-Predicted small integral membrane protein[S]
GE00382	9.41	20.14	-1.0978	0.0154572	0.0284554	down	GE00382	Low molecular weight protein antigen 6	GO:0005575,GO:0005576	-	-
GE03606	5.02	10.74	-1.09723	0.0154572	0.0284554	down	GE03606	hypothetical protein	-	-	-
GE02237	0.99	3.55	-1.84232	0.0155666	0.0286335	down	GE02237	putative protein YtmO	-	-	COG2141-Coenzyme F420-dependent N5,N10-methylene tetrahydromethanopterin reductase and related flavin-dependent oxidoreductases[C]
GE01817	3.46	12.39	-1.84033	0.0155666	0.0286335	down	GE01817	hypothetical protein	-	-	-
GE04045	3.44	10.13	-1.55815	0.0163224	0.0299687	down	GE04045	hypothetical protein	-	-	-
GE01968	8.58	25.24	-1.55666	0.0163224	0.0299687	down	GE01968	hypothetical protein	-	-	-
GE04703	2.8	8.25	-1.55897	0.0163224	0.0299687	down	GE04703	Thiol-disulfide oxidoreductase ResA	-	-	COG0526-Thiol-disulfide isomerase and thioredoxins[OC]
GE03561	4.71	10.3	-1.12885	0.0163394	0.0299755	down	GE03561	hypothetical protein	-	-	-
GE04095	12.49	25.01	-1.00173	0.01666	0.0305203	down	GE04095	Methanesulfonate monooxygenase hydroxylase subunit beta	-	-	-
GE03031	1.02	4	-1.97143	0.0169411	0.0309975	down	GE03031	Zinc import ATP-binding protein ZnuC	-	-	COG1121-ABC-type Mn/Zn transport systems, ATPase component[P]
GE02646	6.68	26.22	-1.97275	0.0169411	0.0309975	down	GE02646	hypothetical protein	-	-	-
GE03820	0.52	2.91	-2.48444	0.0170426	0.0311264	down	GE03820	hypothetical protein	-	-	-
GE02496	0.54	3.03	-2.48829	0.0170426	0.0311264	down	GE02496	Fatty acyl-CoA reductase	-	-	COG0300-Short-chain dehydrogenases of various substrate specificities[R]
GE03172	0.63	3.55	-2.4944	0.0170426	0.0311264	down	GE03172	HTH-type transcriptional regulator McbR	-	-	COG1802-Transcriptional regulators[K]
GE03901	5.25	14.11	-1.42633	0.0176338	0.032154	down	GE03901	Leucine-responsive regulatory protein	-	-	COG1522-Transcriptional regulators[K]
GE01325	1.76	7.92	-2.16993	0.0176772	0.0321553	down	GE01325	hypothetical protein	-	-	-
GE02204	1.05	4.72	-2.1684	0.0176772	0.0321553	down	GE02204	hypothetical protein	-	-	-
GE01359	0.75	3.34	-2.15489	0.0176772	0.0321553	down	GE01359	Dipeptide transport system permease protein DppC	-	K02034-ko02024 Quorum sensing	COG1173-ABC-type dipeptide/oligopeptide/nickel transport systems, permease components[EP]
GE00178	1	4.47	-2.16027	0.0176772	0.0321553	down	GE00178	putative succinyl-CoA:3-ketoacid coenzyme A transferase subunit B	GO:0001666,GO:0006950,GO:0008150,GO:0009628,GO:0036293,GO:0050896,GO:0070482	K01029-ko00650 Butanoate metabolism;ko00072 Synthesis and degradation of ketone bodies;ko00280 Valine, leucine and isoleucine degradation	COG2057-Acyl CoA:acetate/3-ketoacid CoA transferase, beta subunit[I]
GE00169	0.55	2.44	-2.14938	0.0176772	0.0321553	down	GE00169	p-hydroxybenzoate hydroxylase	-	K00481-ko01220 Degradation of aromatic compounds;ko00362 Benzoate degradation	COG0654-2-polyprenyl-6-methoxyphenol hydroxylase and related FAD-dependent oxidoreductases[HC]
GE02983	1.12	5.04	-2.16993	0.0176772	0.0321553	down	GE02983	Bile acid 7-alpha dehydratase	-	-	-
GE03387	1.89	8.48	-2.16568	0.0176772	0.0321553	down	GE03387	hypothetical protein	-	-	-
GE03406	1.92	8.63	-2.16825	0.0176772	0.0321553	down	GE03406	Nucleoid-associated protein Lsr2	-	-	-
GE00529	1.02	4.56	-2.16046	0.0176772	0.0321553	down	GE00529	hypothetical protein	-	-	-
GE03104	3.49	8.39	-1.26544	0.0181537	0.0329092	down	GE03104	putative ECF RNA polymerase sigma factor SigI	-	-	-
GE00392	6.06	14.55	-1.26363	0.0181537	0.0329092	down	GE00392	hypothetical protein	-	-	COG3871-Uncharacterized stress protein (general stress protein 26)[R]
GE02042	4.03	8.62	-1.09691	0.0184867	0.0334726	down	GE02042	Carnitine transport ATP-binding protein OpuCA	-	K05847-ko02010 ABC transporters	COG1125-ABC-type proline/glycine betaine transport systems, ATPase components[E]
GE01627	2.95	6.3	-1.09464	0.0184867	0.0334726	down	GE01627	Cobyric acid synthase	-	K02232-ko00860 Porphyrin and chlorophyll metabolism	COG1492-Cobyric acid synthase[H]
GE03304	2.55	7.77	-1.60742	0.0189426	0.0342293	down	GE03304	hypothetical protein	-	-	-
GE03857	2.02	6.15	-1.60623	0.0189426	0.0342293	down	GE03857	Ethanolamine ammonia-lyase light chain	-	K03736-ko00564 Glycerophospholipid metabolism	COG4302-Ethanolamine ammonia-lyase, small subunit[E]
GE02595	0.9	2.73	-1.6009	0.0189426	0.0342293	down	GE02595	hypothetical protein	-	-	-
GE03503	1.62	4.92	-1.60266	0.0189426	0.0342293	down	GE03503	hypothetical protein	-	-	-
GE04797	3.85	10.55	-1.45431	0.0208307	0.0374538	down	GE04797	Putative lipoprotein LprB (Precursor)	-	-	-
GE00900	4.31	11.81	-1.45425	0.0208307	0.0374538	down	GE00900	hypothetical protein	-	-	COG1339-Transcriptional regulator of a riboflavin/FAD biosynthetic operon[KH]
GE03439	4.55	12.48	-1.45568	0.0208307	0.0374538	down	GE03439	Acyl-coenzyme A thioesterase PaaI	-	-	COG2050-Uncharacterized protein, possibly involved in aromatic compounds catabolism[Q]
GE04061	3.52	8.16	-1.21299	0.0212758	0.0381174	down	GE04061	hypothetical protein	-	-	COG2159-Predicted metal-dependent hydrolase of the TIM-barrel fold[R]
GE02602	6.58	15.88	-1.27105	0.0217084	0.0388307	down	GE02602	hypothetical protein	-	-	-
GE01687	1.38	4.37	-1.66297	0.0218112	0.0389606	down	GE01687	Putative lipoprotein LppW (Precursor)	GO:0005575,GO:0005576	-	-
GE03073	2.06	6.55	-1.66885	0.0218112	0.0389606	down	GE03073	hypothetical protein	-	-	-
GE00964	1.61	5.11	-1.66626	0.0218112	0.0389606	down	GE00964	putative short-chain type dehydrogenase/reductase blr2146	-	-	COG1028-Dehydrogenases with different specificities (related to short-chain alcohol dehydrogenases)[IQR]
GE00967	1.6	5.09	-1.66959	0.0218112	0.0389606	down	GE00967	Arabinose operon regulatory protein	-	-	COG2207-AraC-type DNA-binding domain-containing proteins[K]
GE01062	13.88	28.43	-1.03441	0.0231343	0.0411692	down	GE01062	putative protein Mb1855	-	-	COG3856-Uncharacterized conserved protein (small basic protein)[S]
GE00141	2.72	5.92	-1.12199	0.0234412	0.0415515	down	GE00141	Acyltransferase papA3	-	-	-
GE00495	3.02	6.77	-1.16461	0.0246048	0.0434774	down	GE00495	hypothetical protein	-	-	-
GE00653	0.78	2.61	-1.7425	0.0248133	0.0437773	down	GE00653	Proton/sodium-glutamate symport protein	-	-	COG1301-Na+/H+-dicarboxylate symporters[C]
GE03862	2.55	8.57	-1.7488	0.0248133	0.0437773	down	GE03862	hypothetical protein	-	-	-
GE03855	1.62	5.44	-1.74761	0.0248133	0.0437773	down	GE03855	hypothetical protein	-	-	-
GE00345	6.03	12.57	-1.05975	0.0248363	0.0437665	down	GE00345	hypothetical protein	-	-	-
GE04027	3.77	7.85	-1.05813	0.0248363	0.0437665	down	GE04027	Putative dioxygenase VC_1345	-	K00451-ko00350 Tyrosine metabolism;ko00643 Styrene degradation	COG3508-Homogentisate 1,2-dioxygenase[Q]
GE02297	3.43	7.14	-1.05772	0.0248363	0.0437665	down	GE02297	Sensor-type histidine kinase PrrB	-	K07655-ko02020 Two-component system	COG3850-Signal transduction histidine kinase, nitrate/nitrite-specific[T]
GE03902	4.09	9.49	-1.21431	0.0255071	0.0448612	down	GE03902	putative membrane protein jhp_1251	-	-	COG1296-Predicted branched-chain amino acid permease (azaleucine resistance)[E]
[truncated: 18 more rows]

## Sheet: Table S2
Table S2. 15 mg/L BPA-treated group (A2) significantly differentially expressed genes
[truncated: 4,119 more rows]

## Sheet: Table S3
Table S3. 40 mg/L BPA-treated group (A3) significantly differentially expressed genes
[truncated: 3,555 more rows]

[truncated: 6 more sheets: Table S4, Table S5, Table S6, Table S7, Table S8, Table S9]
